# Supplementary material for: PelD is required downstream of c-di-GMP for host specialization of Pseudomonas lurida
Source: BMC Microbiol. 2025 Apr 16;25:220. doi: 10.1186/s12866-025-03945-1 (PMC12001729; doi:10.1186/s12866-025-03945-1)
Supplement: Supplementary file 2 — Supplementary Material 2 [file 12866_2025_3945_MOESM2_ESM.xlsx]

## Sheet: Content
Supplementary Table 1	logCPM values (liquid and solid conditions)
Supplementary Table 2	DEG wspE liquid medium
Supplementary Table 3	DEG wspF liquid medium
Supplementary Table 4	DEG rph liquid medium
Supplementary Table 5	DEG wspE solid medium
Supplementary Table 6	DEG wspF solid medium
Supplementary Table 7	DEG rph solid medium
Supplementary Table 8	Shared gene expression signature liquid medium
Supplementary Table 9	Shared gene expression signature solid medium
Supplementary Table 10	GSEA liquid medium
Supplementary Table 11	GSEA solid medium
Supplementary Table 12	GO terms
Supplementary Table 13	KEGG Orthology
Supplementary Table 14	Statistic details Fig2a
Supplementary Table 15	Statistic details Fig2b (comparision with anc)
Supplementary Table 16	Statistic details Fig2b (comparinson with wspE)
Supplementary Table 17	Statistic details FigS1 (comparision with anc)
Supplementary Table 18	Statistic details FigS1 (comparision with wspE)
Supplementary Table 19	Statistic details Fig2c
Supplementary Table 20	List of bacteria for and from genetic manipulation
Supplementary Table 21	List of primers

## Sheet: Supplementary Table 1
logCPM liquid medium																						logCPM colony
	Synonym	anc_liquid_5_S44	wspF_liquid_1_S35	wspF_liquid_2_S31	rph_liquid_3_S22	anc_liquid_4_S43	wspF_liquid_5_S24	wspF_liquid_3_S42	wspE_liquid_5_S54	wspE_liquid_1_S30	rph_liquid_5_S29	anc_liquid_2_S46	rph_liquid_4_S23	wspE_liquid_2_S16	rph_liquid_1_S25	anc_liquid_3_S17	wspF_liquid_4_S38	anc_liquid_1_S40	wspE_liquid_3_S37	rph_liquid_2_S36	wspE_liquid_4_S48	Synonym	anc_colony_5_S34	wspE_colony_5_S39	wspE_colony_1_S50	rph_colony_3_S27	wspF_colony_4_S18	anc_colony_1_S15	rph_colony_5_S19	wspF_colony_1_S45	wspF_colony_3_S32	wspF_colony_5_S49	wspF_colony_2_S26	anc_colony_4_S33	anc_colony_2_S51	wspE_colony_4_S53	rph_colony_1_S20	rph_colony_2_S41	anc_colony_3_S47	wspE_colony_3_S52	rph_colony_4_S28	wspE_colony_2_S21
	CLM75_RS00005	8.43131	8.48442	8.35723	8.98538	8.48056	9.38516	8.74539	8.85661	8.69933	8.85892	8.14704	8.20372	8.73864	8.84399	8.53825	8.48313	8.53541	8.57889	9.13262	7.96164	CLM75_RS00005	6.87044	7.92218	7.47835	7.59816	7.38665	6.73719	7.76001	7.33624	7.26283	7.12472	7.19177	7.51138	7.327	7.20518	8.1313	7.62962	7.148	7.5447	7.79153	7.88027
	CLM75_RS00010	8.84405	8.10453	8.59097	8.9156	8.94555	8.87502	8.35429	8.90425	8.26031	9.01863	8.49362	8.43015	8.46871	8.69026	8.89066	8.66091	8.93647	8.32346	8.65202	8.34904	CLM75_RS00010	8.1482	8.14245	8.16836	8.68233	7.99731	8.15825	8.32456	8.51694	8.4695	8.38987	8.38702	8.20608	8.29626	8.24105	8.23748	8.42374	8.3832	8.20066	8.5255	8.31245
	CLM75_RS00015	7.82263	8.11	7.73428	7.783	7.92333	8.43015	8.02893	7.97476	8.04945	7.55269	7.59266	7.64635	8.28179	8.06748	7.86273	7.88829	8.15879	8.18709	8.39372	7.36432	CLM75_RS00015	6.46361	7.14195	6.88018	6.91304	6.81133	6.19302	7.12233	6.81034	6.60967	6.6157	6.57724	6.89736	6.42807	6.66776	7.64151	7.06422	6.48596	6.78474	7.0296	7.00055
	CLM75_RS00020	10.3243	9.41216	9.91679	9.91063	10.3992	10.4172	9.56316	10.6302	9.34754	9.92653	10.0431	9.72915	9.8187	10.3923	10.48	10.0016	10.5616	9.43494	10.4939	9.29888	CLM75_RS00020	9.03816	9.53726	9.69714	10.0701	9.5598	9.18414	9.91557	9.77705	9.70565	9.50987	9.69496	9.55622	9.63603	9.52493	10.0354	10.0037	9.53908	9.62376	9.98995	9.76286
	CLM75_RS00025	6.28969	6.30942	6.12388	6.6225	6.05611	6.5746	6.47909	6.61393	6.43703	6.35373	6.33377	6.44455	6.15652	6.39209	6.20646	6.42176	6.48662	6.33062	5.95487	6.41648	CLM75_RS00025	5.66268	5.7372	6.34567	6.02577	5.53448	6.37883	5.67601	6.29617	6.32518	5.28668	6.00284	5.86781	5.73206	6.25915	6.13892	5.78461	6.2507	5.97856	6.09331	5.54306
	CLM75_RS00030	3.78168	4.29787	4.0209	3.99854	4.10829	4.35346	4.23273	4.27939	4.30296	3.98295	3.95098	3.92321	4.2404	3.87081	3.99035	4.35247	4.03619	4.03137	3.94019	4.02755	CLM75_RS00030	4.16167	3.87225	4.07342	3.60323	4.0558	4.61527	3.81399	3.93879	3.99067	3.55887	4.10588	3.69171	4.51357	3.98556	3.78618	3.92273	4.31968	4.12986	3.69821	3.98092
	CLM75_RS00035	6.22706	6.43896	6.08501	6.21948	6.13576	6.099	6.18589	6.1498	6.51129	6.10524	6.12072	6.30274	6.43603	5.94632	6.17714	6.25693	6.30681	6.32225	5.97467	6.41939	CLM75_RS00035	6.74971	6.17649	6.41522	5.90288	6.4198	6.88464	5.76849	6.49979	6.49968	6.60916	6.57418	6.34982	6.21941	6.55326	6.03828	5.99676	6.56738	6.30109	5.9842	6.32068
	CLM75_RS00040	7.97445	7.21387	7.60384	7.56669	8.06855	8.10209	7.34146	7.89078	7.02769	7.41831	7.56531	7.58693	7.39052	7.78251	7.88909	7.81602	8.07175	7.53091	8.09491	7.58864	CLM75_RS00040	5.93331	6.30541	6.25002	6.46255	6.24922	5.96598	6.44655	6.05552	6.07807	6.26636	6.18868	6.25868	6.24285	5.98253	6.85709	6.50196	6.26472	6.32338	6.58285	6.26909
	CLM75_RS00045	7.87583	6.58387	7.3171	6.9538	8.01729	7.36789	6.68576	7.45282	6.26631	6.74282	7.61105	7.08324	6.84289	7.44287	7.7906	7.33794	7.85679	6.69683	7.36296	6.92398	CLM75_RS00045	5.86194	6.34923	6.25419	6.32346	6.17464	5.8153	6.45814	6.20575	6.15499	6.01586	6.05342	6.24677	6.37248	5.96932	6.76897	6.44983	6.19428	6.31271	6.50775	6.29244
	CLM75_RS00050	9.22493	8.04159	8.8825	8.85355	9.35062	8.91015	8.22047	9.14846	8.09908	8.86481	9.02282	8.40438	8.71233	9.04193	9.43557	8.68441	9.15402	8.24094	8.9239	8.27234	CLM75_RS00050	7.63385	8.31851	7.92894	8.18653	7.82493	7.5168	8.22321	7.92195	7.94384	7.84752	7.88721	8.12053	8.1323	7.78481	8.31413	8.17504	7.96572	8.07213	8.22472	8.17084
	CLM75_RS00055	7.30959	7.10272	7.1779	7.6572	7.25587	8.19092	7.58918	7.66265	7.44568	7.85445	6.91607	7.13829	7.73326	7.67052	7.24445	7.29248	7.46886	7.51997	8.04012	6.91427	CLM75_RS00055	6.3018	7.15872	6.51055	6.82956	6.54351	6.00209	6.88772	6.47507	6.45538	6.47334	6.34257	6.87099	6.70621	6.49302	7.16396	6.76564	6.39422	6.47162	6.87912	6.9018
	CLM75_RS00060	5.79135	6.05175	5.70388	5.67057	5.64965	5.96403	5.97235	5.84304	5.92311	5.68472	5.30985	6.02687	5.67334	5.93778	5.5926	5.96508	5.93301	6.00703	6.04358	5.74557	CLM75_RS00060	4.25117	4.74458	4.54085	4.55279	4.25183	4.25829	4.55753	4.52805	4.43686	4.01529	4.15848	4.77638	3.85805	4.14124	4.96683	4.36636	4.59793	4.4261	4.7012	4.35993
	CLM75_RS00065	7.34024	7.86448	7.56904	7.50096	7.35239	7.95695	7.76197	7.69431	7.74494	7.60643	7.08091	7.4367	7.9267	7.63533	7.61674	7.62174	7.36562	7.97165	8.12441	7.34649	CLM75_RS00065	5.87818	6.50618	6.25465	6.30114	6.16791	5.94031	6.47509	6.12675	6.01499	6.13798	6.02014	6.24591	6.72297	6.16809	6.73653	6.40374	6.11913	6.39759	6.47455	6.19762
	CLM75_RS00070	5.99365	5.59301	5.70205	5.33444	5.8857	5.64841	5.6091	5.99815	5.27994	5.37626	5.64197	5.49105	5.18627	5.73437	5.90138	5.84034	5.66348	5.53661	5.69461	5.66716	CLM75_RS00070	4.98379	4.78875	5.09598	5.27812	4.90257	5.58074	5.26277	5.27689	5.26462	5.20424	4.98125	5.17338	5.53094	5.33145	5.25713	5.50762	5.74647	5.2534	5.52468	4.80927
	CLM75_RS00075	7.03032	6.83038	6.80034	6.92132	6.97614	6.84321	6.75101	7.05436	6.62316	6.75739	6.76855	7.04509	7.04083	6.98615	7.05009	6.97919	7.11509	6.68938	6.86419	6.72494	CLM75_RS00075	5.67	5.74926	5.75075	6.188	5.75348	5.68293	6.02979	5.77081	5.88083	5.80189	5.94727	5.54818	6.03478	5.78969	5.99323	6.00686	5.93607	5.89973	6.01588	5.84229
	CLM75_RS00080	6.24614	5.95341	6.10943	6.20627	6.54396	6.20723	5.93263	6.28649	6.22073	6.24732	6.05146	5.85158	6.37297	6.31034	6.40187	6.11976	6.30716	6.15782	6.35002	5.4915	CLM75_RS00080	4.66512	5.02321	4.54993	5.05017	4.45788	4.44171	4.76557	4.70677	4.59245	4.92887	4.63557	4.43614	4.6831	4.64937	5.20672	4.83182	4.80667	4.82744	4.83897	4.52069
	CLM75_RS00085	4.45624	4.72022	4.7878	4.78658	4.69907	4.73382	5.02071	4.66317	5.18609	5.13627	4.16527	4.76608	5.46263	5.06866	4.76899	4.9024	4.50264	5.18114	4.98488	4.02973	CLM75_RS00085	3.40533	4.3253	3.70745	3.75843	3.79084	3.44854	3.83447	3.49688	3.62433	3.81771	3.90017	3.24154	3.35454	3.40843	4.1486	3.76102	3.54666	3.63029	3.99607	3.41394
	CLM75_RS00090	7.58172	8.24707	7.77977	8.53939	7.5719	8.90599	8.46814	8.17011	8.21099	8.30415	7.35288	8.13593	8.42473	8.20115	7.74136	8.07407	7.98587	8.31411	8.35546	7.93381	CLM75_RS00090	5.91767	6.82924	6.50122	6.40134	6.52097	5.97916	6.64558	6.36379	6.20446	6.29199	6.29699	6.16502	6.40748	6.22104	6.988	6.49958	6.35265	6.3846	6.52321	6.70029
	CLM75_RS00095	3.69486	3.95845	3.96388	3.76498	3.28126	3.42861	3.86852	4.08508	3.93243	3.99958	3.40505	4.14596	3.99846	3.82424	3.45155	3.81471	3.40199	3.67226	3.38653	4.23843	CLM75_RS00095	5.00324	4.39364	4.89807	4.73649	4.48412	5.25005	4.69826	4.9558	5.06732	4.98382	4.83414	4.90973	5.11438	5.23324	4.09843	4.74395	5.27472	4.69692	4.49902	4.70334
	CLM75_RS00100	5.401	5.5435	5.25368	5.12391	5.38574	4.90712	5.44547	5.18831	5.63285	5.01703	5.60605	5.10693	5.60802	4.7887	5.53276	5.24295	5.36267	5.62896	4.89113	5.53516	CLM75_RS00100	6.2555	5.98093	6.11735	5.65241	6.02403	6.01955	5.51618	6.1113	6.09769	6.18075	6.29204	6.20692	5.99851	6.11473	5.29103	5.56971	6.01992	5.87382	5.37654	6.0001
	CLM75_RS00105	7.23675	7.69173	7.45579	7.50505	7.14988	7.55521	7.71739	7.67977	7.60325	7.5428	6.98028	7.70463	7.65973	7.61584	7.02882	7.7106	7.46965	7.52498	7.57643	7.41841	CLM75_RS00105	7.26709	7.05285	7.24389	7.55646	6.8501	7.27839	7.42344	7.39333	7.36654	7.32953	7.3106	7.35249	7.46794	7.30665	7.55115	7.4526	7.47521	7.14776	7.46173	7.04353
	CLM75_RS00110	7.72194	7.67459	7.74857	7.40937	7.52731	7.37839	7.55891	7.65453	7.69948	7.74605	7.92708	7.52142	7.61701	7.63459	7.36006	7.74024	7.52278	7.68461	7.51212	7.48193	CLM75_RS00110	6.92381	6.98556	6.9025	7.31296	6.77148	6.96479	7.30217	7.08204	7.10276	7.20014	6.9646	6.94554	7.05195	6.88957	6.988	7.33973	6.96636	7.04883	7.3192	6.81079
	CLM75_RS00115	7.08961	8.54357	7.91871	8.51969	7.06683	8.24217	8.95711	8.41273	8.63152	8.77307	7.28894	8.52886	9.2118	8.3403	7.38343	8.12083	7.20086	8.7915	8.29628	8.3049	CLM75_RS00115	6.30807	7.28931	6.57831	7.00018	6.50611	6.10191	6.96869	6.64007	6.51496	6.40787	6.42567	6.73992	6.61334	6.43977	7.17005	6.8499	6.3185	6.63443	7.08034	6.68951
	CLM75_RS00120	7.58422	8.88296	8.20982	8.32292	7.75137	7.45	8.4811	8.84835	8.74893	8.72904	7.91413	8.69376	8.78186	8.47533	7.77573	8.41472	7.64883	8.73408	7.94632	8.35612	CLM75_RS00120	6.54373	7.13119	6.67277	7.24847	6.66319	6.55966	7.1977	6.922	6.92566	6.97849	6.97852	6.82022	6.99096	6.6319	7.36919	7.08523	6.81265	6.9155	7.29103	6.70432
	CLM75_RS00125	4.39678	5.4962	4.73318	4.70006	4.15887	4.70939	5.58161	4.91114	5.42603	4.94893	4.15062	5.31865	5.57611	5.05206	4.41841	5.17955	4.40303	5.63548	4.88499	4.8977	CLM75_RS00125	4.42278	4.35933	4.59303	4.40853	4.38779	4.59623	4.31193	4.63997	4.68506	4.02842	4.39144	4.23718	4.1502	4.39667	4.29685	4.47951	4.72502	4.43558	4.3989	3.913
	CLM75_RS00130	5.19826	5.54514	5.30049	5.31889	5.37993	5.28076	5.24084	5.29462	5.42736	4.89533	5.32732	5.22003	5.44715	5.03082	5.41068	5.46462	5.15069	5.41596	5.21093	5.39325	CLM75_RS00130	4.81501	4.60879	4.68519	4.67404	5.00731	5.01929	4.82647	4.92845	4.91991	4.49043	4.97817	4.61097	4.44785	4.95286	4.54177	4.8185	4.94986	5.01611	4.69709	4.79927
	CLM75_RS00135	5.06375	5.02785	4.95729	4.85491	5.26393	4.99969	4.90278	4.93011	4.97052	4.91049	4.95461	5.18331	4.778	4.8415	4.9349	5.2042	4.87281	5.17564	4.81175	5.25556	CLM75_RS00135	5.09071	4.71096	5.05299	4.81704	4.92669	5.24044	4.93318	5.01837	4.96867	5.04108	5.00412	4.76926	5.01803	5.07787	4.4245	4.83938	5.30022	4.78234	4.90545	4.88212
	CLM75_RS00140	3.64462	4.07514	3.83926	4.26279	3.60689	4.16687	4.14594	3.91319	4.17358	4.42249	3.20539	4.15442	4.00412	4.02378	3.61357	4.10944	3.5949	4.40924	4.09511	4.13684	CLM75_RS00140	4.17545	4.46697	4.27305	3.88634	4.14349	4.58108	3.68085	4.17686	4.33033	4.14149	4.6569	4.52902	3.83767	4.30154	3.53276	3.8176	4.79843	4.34628	3.90286	4.26868
	CLM75_RS00145	4.87512	4.84894	4.79298	4.44025	4.78355	4.90173	4.73027	4.80207	4.61007	4.52125	4.19729	4.70214	4.46404	4.68487	4.84244	4.95418	4.86899	4.67471	4.99518	5.32826	CLM75_RS00145	4.40143	4.34187	4.67692	3.33917	4.40849	4.78587	3.77214	4.48803	4.23759	4.51551	4.48329	4.84346	4.43434	4.0167	4.23627	3.70213	4.54313	4.35463	3.43028	4.32202
	CLM75_RS00150	4.41188	5.97792	4.75987	4.53044	4.61757	3.75417	6.24934	4.23865	5.90348	4.49132	4.48099	4.71744	5.46674	3.92937	4.41562	5.36274	3.73383	5.57885	3.91146	6.26959	CLM75_RS00150	3.75047	3.58366	3.64102	3.378	3.57178	3.60645	3.25914	3.59868	3.55506	3.76639	3.59336	3.53258	3.29599	4.16305	3.58228	3.42913	3.76523	3.39473	3.53523	3.60971
	CLM75_RS00155	3.4645	5.56685	4.07575	3.59835	3.26456	2.70043	5.49271	3.67367	5.52301	3.83324	3.97149	3.92979	5.2097	3.0785	3.29047	3.90124	3.5786	4.5718	2.98844	4.62502	CLM75_RS00155	3.90186	3.17647	3.40456	3.75575	3.54294	3.62536	3.38942	3.75558	3.71603	3.35163	3.88382	3.36635	3.61623	3.67017	3.66503	3.27325	3.8313	3.49785	3.20875	3.68223
	CLM75_RS00160	4.3007	6.25697	4.96496	4.70918	4.32716	4.35346	6.12601	4.62708	6.07293	4.80899	4.53711	4.7624	6.43864	4.51553	4.40301	4.50197	4.3409	5.5642	4.31394	5.28142	CLM75_RS00160	4.17316	4.04948	4.28216	4.11039	3.96555	4.28742	4.16336	4.04304	4.32895	4.09649	4.03658	4.25088	3.17122	4.23543	3.78618	4.04543	4.15314	4.04779	4.11012	4.2795
	CLM75_RS00165	2.77745	3.51155	2.79966	3.06765	2.69533	2.99541	3.21941	3.06194	3.20521	2.45716	2.67015	2.78201	3.49923	2.56608	2.83227	2.94352	2.51203	3.04422	3.06868	2.78754	CLM75_RS00165	4.11475	3.90681	3.83673	3.95332	4.11858	4.23209	3.66569	3.99112	3.95705	4.06286	4.10588	4.16666	3.93682	4.01327	3.19363	3.92273	4.3538	3.92533	3.86492	3.8122
	CLM75_RS00170	4.18024	4.51107	4.58382	4.44843	4.21428	4.34714	4.37988	4.38335	4.43322	4.57059	4.05949	4.82378	4.13355	4.25813	3.66142	3.70055	4.1477	4.39512	4.49586	5.48277	CLM75_RS00170	5.92109	5.46711	5.87637	6.00844	5.27744	5.9026	6.10477	6.10079	5.98238	5.77098	5.56278	5.62119	5.39805	5.66857	5.99552	6.00182	5.6763	5.46717	6.03471	5.34595
	CLM75_RS00175	6.17658	6.39018	6.18096	6.00075	6.18096	5.29889	6.26229	6.18746	6.27743	6.33208	5.71291	6.55727	6.21131	6.2705	6.18084	6.59018	6.26341	6.46028	5.62923	6.37074	CLM75_RS00175	5.9387	5.7961	5.9531	6.32662	5.92453	6.13952	6.10687	6.09636	6.12224	5.75132	6.24928	5.76297	5.87893	6.12111	5.67734	6.18167	5.99491	5.79931	5.96255	5.73623
	CLM75_RS00180	7.00067	6.85705	7.02161	7.46256	6.99872	6.89802	6.86844	7.37062	6.99784	7.33404	6.40987	7.32656	6.84131	7.1965	6.87927	7.05374	7.0543	6.57846	6.62308	6.94205	CLM75_RS00180	6.49876	6.54461	6.66374	6.94042	6.44897	6.66819	6.61975	6.9164	6.89982	6.59893	6.82514	6.52844	6.41093	6.69849	6.39242	6.75768	6.73424	6.49334	6.78841	6.62092
	CLM75_RS00185	4.59993	5.08539	5.10061	4.93188	4.814	4.95882	5.1672	5.04024	4.85394	5.00355	4.67084	5.12856	4.74462	5.08593	4.74366	5.09452	4.51002	5.03328	4.69159	5.53823	CLM75_RS00185	8.04795	7.29017	7.58728	7.3987	7.46314	7.84103	7.40759	7.60325	7.77058	7.79759	7.7835	7.74287	7.58873	7.67279	6.85331	7.43103	7.61931	7.43814	7.09388	7.27533
	CLM75_RS00190	8.26592	8.08134	9.03698	9.04689	7.72586	8.75369	8.03649	8.62805	8.36508	9.45329	9.23441	9.53965	7.70099	8.84836	6.89937	7.1384	8.1845	7.60355	8.3896	10.3298	CLM75_RS00190	12.5006	11.6793	12.2606	12.6837	11.8728	12.2879	12.7638	12.4654	12.2214	12.5024	12.1275	12.4181	12.3489	12.1902	12.4654	12.7459	12.3035	12.0107	12.4016	12.0658
	CLM75_RS00195	9.57259	9.27699	9.57489	9.3041	9.36342	8.75503	8.85424	8.89065	9.38875	9.10496	10.2417	9.24627	8.87486	8.4942	9.28557	8.98125	9.50612	8.67305	8.08677	10.2884	CLM75_RS00195	11.5365	11.1109	11.5807	11.6469	11.7449	11.7082	11.7395	11.7315	11.5209	11.4439	11.703	11.575	11.6732	11.4455	11.2767	11.8417	11.6813	11.5975	11.5164	11.6858
	CLM75_RS00200	9.70003	9.8352	9.85649	9.59162	9.75228	9.9172	9.46834	9.59646	10.2236	8.94145	10.1997	9.32838	9.94601	9.02944	9.59564	9.18504	9.78987	9.70962	8.87344	10.4009	CLM75_RS00200	10.4909	10.9085	10.7035	10.2712	11.4707	10.2837	10.6722	10.7133	10.6552	10.9843	10.8391	10.7576	10.9636	10.6398	10.4011	10.504	10.6457	11.2083	10.2617	11.2428
	CLM75_RS00205	5.56191	5.7137	5.97767	5.1799	5.86853	5.99216	6.41093	5.53933	5.37774	6.01433	4.8477	6.95193	5.40611	5.99099	6.55981	6.63069	5.74188	6.51161	5.10391	7.22941	CLM75_RS00205	4.91835	5.58963	5.44243	5.68725	5.59995	4.69927	5.94758	5.35826	5.37927	5.80444	5.52216	5.45805	5.86892	5.13417	5.64275	5.75195	5.06875	5.40099	5.38678	5.69503
	CLM75_RS00210	8.61548	7.82043	8.7708	8.72898	8.34054	8.41927	7.83265	8.17338	7.8844	8.87877	9.7041	8.76199	7.52956	7.87692	7.84263	7.51813	8.38213	7.53185	8.0233	9.67963	CLM75_RS00210	11.3991	11.2717	11.2672	11.7414	11.2966	11.1363	11.814	11.2769	11.2721	11.5379	11.4607	11.6046	11.6767	11.1727	11.3951	11.8443	11.4866	11.3992	11.5349	11.5155
	CLM75_RS00215	7.37989	8.67974	8.17966	7.78489	7.53712	7.44409	8.21392	8.36335	8.49347	7.7262	7.69601	8.69037	8.33421	8.18571	7.83104	8.3575	7.45856	8.32074	7.16246	8.81662	CLM75_RS00215	7.48337	7.43426	7.82322	7.50696	7.52869	8.10559	7.2662	7.81952	8.02325	7.6725	7.69139	7.27416	7.92453	7.65174	7.33619	7.62608	8.05253	8.01322	7.73118	7.42791
	CLM75_RS00220	6.51263	7.36028	6.9372	6.58058	6.46118	6.22156	7.3643	6.86275	7.0447	6.50452	6.53166	7.31435	6.98081	6.8611	6.76236	7.26993	6.19251	7.35916	5.9336	7.62913	CLM75_RS00220	7.80322	7.21106	7.82447	7.33533	7.15854	8.25782	6.80583	7.77831	7.94892	7.47448	7.6231	7.2068	7.40872	7.71981	6.83556	7.29782	8.00829	7.56013	7.44575	7.01628
	CLM75_RS00225	4.98393	6.11978	5.2066	4.8311	5.13089	4.78382	6.09367	5.25002	5.87482	5.09926	4.88455	5.61061	5.67068	5.14396	5.0731	5.85097	4.998	5.91811	4.95469	5.79964	CLM75_RS00225	5.20488	5.68578	6.13556	5.15956	5.19113	5.58903	4.87999	6.01132	6.18319	5.36467	5.90253	5.03377	5.18868	6.31589	5.24949	5.13409	5.57549	5.84921	5.51071	5.11154
	CLM75_RS00230	4.96869	5.67425	5.32334	5.14338	5.08882	5.09331	5.64571	5.33891	5.74171	5.5605	4.76038	5.30606	5.71789	5.10044	5.30091	5.45218	4.72517	5.65437	5.27152	5.47798	CLM75_RS00230	4.29181	4.74955	4.49143	4.70074	4.44011	4.82963	4.73503	4.42529	4.61418	4.26865	4.55526	4.47751	4.66006	4.71201	4.71823	4.79828	4.88912	4.9831	4.83056	4.58029
	CLM75_RS00235	4.46893	4.60849	4.66138	5.0929	4.75693	5.30787	5.06615	5.02267	5.00539	5.12169	4.18136	4.81669	5.12662	4.92734	4.79175	4.54533	4.36146	4.81739	5.09436	4.58255	CLM75_RS00235	3.7163	4.39258	3.9208	4.30244	3.81861	3.64667	3.91999	3.76076	3.84157	3.55282	3.80613	3.88857	3.23495	3.81498	4.3262	3.95091	3.4164	3.96949	4.00938	4.32551
	CLM75_RS00240	8.02011	7.90945	8.21063	8.00269	8.34812	8.08319	8.19937	8.18908	7.80292	8.42941	7.67271	8.65417	8.07659	8.33408	8.67828	8.43094	8.15133	8.42211	7.75933	8.71182	CLM75_RS00240	7.82343	8.13383	8.19742	8.56229	8.43108	7.96962	8.58893	8.22557	8.15246	8.46261	8.3701	8.24574	8.17862	7.95924	8.02228	8.50529	8.12429	8.01493	8.21074	8.22763
	CLM75_RS00245	7.26508	7.36354	7.32218	6.68938	7.55633	6.80998	7.24577	7.17118	6.95326	6.94834	7.06581	7.63733	7.40555	7.1953	7.64602	7.69236	7.36086	7.90598	6.76163	7.862	CLM75_RS00245	6.49327	6.65546	6.62917	6.78692	6.8404	6.64983	7.11676	6.68069	6.5922	6.88595	6.8358	6.80579	6.96065	6.51984	6.67225	7.02187	6.90056	6.69848	6.81471	6.59731
	CLM75_RS00250	2.812	2.92257	2.75082	2.09948	2.67651	2.57622	3.38556	2.66886	2.75473	2.37577	2.10811	2.83909	3.41685	3.03293	2.78121	3.3958	2.96313	3.33784	2.31046	3.28801	CLM75_RS00250	2.95076	2.6991	2.75883	2.29293	3.20711	3.10405	2.38343	2.96225	2.8415	2.78796	2.51356	2.92863	2.71522	2.29158	3.14503	2.38864	3.08742	2.19131	2.47196	2.07734
	CLM75_RS00255	6.15767	5.76672	5.9478	6.31886	6.0267	5.98097	6.17419	6.09441	6.60915	6.03752	5.86519	5.74175	6.85311	5.97255	6.18371	5.75354	6.21377	6.36965	5.50655	6.1648	CLM75_RS00255	5.7451	4.86333	5.36994	5.05562	4.91548	5.8786	4.80068	5.64253	5.75315	5.18873	5.53582	5.10149	4.98134	5.68266	4.89027	5.08089	5.88902	5.1574	5.15041	5.20159
	CLM75_RS00260	7.36469	7.01364	7.11623	6.75082	7.37031	6.65036	7.0136	7.25741	7.36497	6.66283	6.88397	6.8336	7.52022	7.15946	7.27649	7.03473	7.39017	7.19198	6.83898	6.96332	CLM75_RS00260	6.62383	5.73679	6.48395	6.65375	5.92693	6.94503	6.17604	6.79508	6.8709	6.24683	6.57927	6.25274	6.58916	6.82604	6.27876	6.46182	7.10302	6.1307	6.50687	5.94675
	CLM75_RS00265	7.45104	7.38049	7.21598	6.60582	7.43144	7.04464	7.16787	7.35917	7.44874	6.59252	6.89816	6.99574	7.61563	7.25853	7.38183	7.44799	7.29132	7.57697	7.13606	7.24287	CLM75_RS00265	6.76878	5.8021	6.22284	6.6559	5.63355	6.90634	6.04452	6.74262	6.88531	6.11355	6.55469	6.21393	6.72575	6.75447	6.30848	6.46274	7.12129	6.06302	6.60713	5.72967
	CLM75_RS00270	4.99148	4.68393	4.88315	4.53557	5.07691	4.36758	4.59172	4.45248	4.67725	4.44869	4.77742	4.85698	4.59905	4.57788	4.92121	4.60737	4.9857	4.42322	4.14326	4.97899	CLM75_RS00270	4.90738	4.92767	5.44892	5.14837	4.98758	5.13693	4.36919	5.22664	5.42787	4.77898	5.06194	4.83894	4.48764	5.4234	5.11717	5.01317	4.84981	4.98418	5.19623	4.89626
	CLM75_RS00275	8.4536	8.47376	8.55586	8.78488	8.4436	8.85344	8.81007	8.82147	8.53352	8.84728	8.51918	8.77199	8.62112	8.66599	8.48481	8.71237	8.64393	8.60448	8.38264	8.86867	CLM75_RS00275	9.5429	9.82836	9.97479	9.58036	9.44703	9.65393	9.44434	9.91009	9.87571	9.69759	9.89487	9.72774	9.7765	9.62809	9.84985	9.53548	9.70264	9.75579	9.58318	9.42451
	CLM75_RS00280	5.72792	5.87117	5.8942	5.3337	6.0476	5.41147	5.77372	5.66033	5.74278	5.5585	6.25228	5.9251	5.65997	5.518	6.11061	5.82112	5.66182	5.8229	5.43686	5.96609	CLM75_RS00280	7.13017	6.76354	7.08509	7.64232	6.35847	7.31109	7.01204	7.61402	7.76753	7.29237	7.31822	6.98193	7.20699	7.33163	7.5819	7.34554	7.87889	7.50849	7.9547	6.40633
	CLM75_RS00285	6.76934	6.46896	6.25413	6.90926	6.73981	7.4634	6.85238	6.45129	6.6591	6.97817	6.4776	6.21044	6.88026	6.65442	6.47365	6.42887	6.96107	6.69563	7.12385	6.17715	CLM75_RS00285	6.86123	7.35907	7.63232	6.83115	7.11686	6.86004	6.90396	7.23448	7.11725	7.08652	7.23366	6.69679	6.79346	7.19084	7.0454	6.89751	6.87337	7.43637	6.67839	7.22253
	CLM75_RS00290	8.75436	7.76258	7.84957	7.92755	8.72495	7.24599	7.1152	7.64697	7.66407	7.54026	8.78027	7.55242	6.93825	7.15497	8.49021	7.71535	8.85013	6.94147	6.67063	8.24454	CLM75_RS00290	9.03194	8.31935	8.83563	8.36602	8.93518	9.44365	8.17535	9.08132	9.03877	8.86453	9.03263	8.65862	8.85062	8.9564	7.93981	8.35026	9.13903	8.8134	8.21739	8.72666
	CLM75_RS00295	6.01667	5.41475	5.47817	5.39501	5.83781	4.60199	5.36953	4.87941	5.35693	5.43727	5.60724	5.71817	4.70698	4.77173	5.47836	5.4485	5.94077	5.33201	4.42141	6.26358	CLM75_RS00295	7.12604	6.17372	6.72348	6.13592	6.88704	6.99315	5.81818	6.89145	6.89399	6.7286	6.91034	6.58564	6.92245	6.88536	5.7332	5.97377	7.02752	6.74209	5.92529	6.74721
	CLM75_RS00300	2.94248	3.77106	3.46837	3.28747	2.97742	2.37344	3.82129	2.33642	4.38836	3.79154	2.84203	3.25546	3.43371	2.35441	2.54655	3.10929	3.14488	3.77395	1.80643	4.26461	CLM75_RS00300	5.41215	4.64485	4.94011	4.28583	5.29855	5.27079	4.07432	5.16745	5.17358	5.16316	5.32068	4.99156	4.69448	5.17462	4.205	4.25915	4.95481	5.06883	4.31026	5.15923
	CLM75_RS00305	5.24853	5.03488	4.74925	4.51102	5.18847	3.80579	4.9502	4.31694	5.35507	4.44782	4.96859	4.80241	4.85979	4.12414	4.93295	4.83298	5.48575	4.79427	3.46769	5.65378	CLM75_RS00305	6.04701	4.86026	5.38355	4.82089	5.84661	5.91803	4.77266	5.66801	5.52404	5.67823	5.83014	5.37449	5.82818	5.76851	4.49082	5.09358	5.47917	5.52823	4.72862	5.528
	CLM75_RS00310	5.64571	4.63133	4.52695	4.64056	5.449	3.77786	4.07389	4.77384	4.86183	4.3994	5.20823	4.58606	4.2404	4.27779	5.10287	4.67946	5.90201	3.5438	3.56004	5.17702	CLM75_RS00310	5.18571	4.09188	4.91573	4.33688	4.84467	5.21034	4.33606	4.98263	4.80229	4.64333	5.01917	4.78817	4.43434	4.98471	3.93653	4.5035	4.87091	4.47594	3.9944	4.7892
	CLM75_RS00315	3.77001	4.56708	4.38327	3.94938	3.75773	3.67563	4.27131	3.72734	4.3654	4.00548	3.8316	4.4734	4.20648	3.67249	3.83628	4.21196	3.78748	4.31242	3.64393	4.83171	CLM75_RS00315	4.68292	4.09319	4.2876	3.65875	4.91065	4.65657	3.97329	4.59334	4.51918	4.98382	4.86279	4.37178	4.84503	4.60225	3.52012	3.89941	4.7308	4.38756	3.81083	4.61775
	CLM75_RS00320	1.3265	1.95066	1.57997	1.5792	1.403	1.14414	1.46853	0.710352	1.92079	1.98034	1.0818	1.30547	1.4215	0.848434	1.13047	1.61061	1.54217	1.62962	1.04287	2.64111	CLM75_RS00320	3.68773	2.58125	2.8645	1.60571	3.25362	3.21879	1.47067	2.87264	3.25074	3.57088	2.7044	2.72777	2.52436	2.89346	1.47754	2.03423	2.99435	2.6801	2.10745	2.78298
	CLM75_RS00325	6.79043	7.0919	7.01313	6.80151	6.98221	7.09431	6.97883	6.84715	7.13748	7.00755	6.67756	6.74164	7.18219	6.9702	6.93363	6.95034	6.89233	7.40096	7.31464	6.74666	CLM75_RS00325	5.9779	6.02571	5.59205	5.90831	5.91893	5.7583	5.96935	5.79077	5.88883	5.91225	5.8903	5.82267	5.59306	5.66748	5.94673	5.84123	5.91845	5.92406	5.85007	5.93538
	CLM75_RS00330	4.60486	4.92151	4.47204	4.59579	4.55026	4.43768	4.78668	4.60869	4.85394	4.69835	4.73878	4.68862	4.84253	4.39464	4.71786	4.65668	4.4383	4.96643	4.39226	5.06979	CLM75_RS00330	4.90048	4.42818	4.72314	4.20961	4.70846	4.92866	4.4107	4.63434	4.78222	4.81731	4.86279	4.74042	5.09733	4.66037	4.45139	4.42781	4.80118	4.64885	4.44983	4.72727
	CLM75_RS00335	6.71446	7.06298	6.76476	6.92988	6.7273	6.68992	7.11582	6.83318	7.15299	7.05947	7.35324	7.29631	6.98009	6.78887	6.9735	6.82057	7.00638	6.99879	6.63959	7.43825	CLM75_RS00335	7.43143	7.11232	7.31818	7.31524	7.39244	7.59838	7.31741	7.17319	7.17476	7.3401	7.18144	7.37299	7.61292	7.42647	7.338	7.39494	7.23295	7.23447	7.22053	7.09348
	CLM75_RS00340	8.12646	7.30516	7.96035	7.79362	8.15831	8.2444	7.68917	8.327	7.38338	8.18766	7.49508	8.25328	7.90212	8.29879	8.34704	7.92052	8.18392	7.70347	8.24083	7.79062	CLM75_RS00340	6.2997	6.59224	6.51326	6.54783	6.30856	6.36483	6.55542	6.548	6.45475	6.28289	6.32693	6.52704	6.82745	6.46194	6.87955	6.62895	6.70296	6.48423	6.65556	6.43809
	CLM75_RS00345	6.11565	5.40876	5.7365	5.79298	6.17762	6.12418	5.46737	6.11765	5.8198	5.96829	5.51497	5.51643	6.01249	5.94821	6.18534	5.42996	6.00707	5.54302	6.11198	5.25556	CLM75_RS00345	4.75354	4.79036	4.74308	4.91629	4.63814	4.98623	4.98447	4.80943	4.78525	4.44546	4.61393	4.65284	4.57643	4.89259	4.99453	4.71753	4.89428	4.83938	4.94495	4.48058
	CLM75_RS00350	5.36848	5.45431	5.48245	5.79405	5.35155	6.30546	6.17105	5.75837	5.96251	5.89842	4.75608	5.41566	6.40163	5.78494	5.54556	5.73735	5.41409	6.06651	6.22816	5.19949	CLM75_RS00350	4.59506	5.48562	4.81388	5.19557	4.8328	4.57831	5.17584	4.83828	4.83187	4.20454	4.74281	4.89889	4.93412	5.05305	5.78434	5.18466	4.74801	4.94822	5.31623	5.05174
	CLM75_RS00355	6.82008	6.53212	7.18152	7.07819	6.68987	6.67012	6.51137	6.83964	6.93607	7.25954	8.20045	7.17754	6.65891	6.84268	6.62733	6.33792	6.82609	6.43233	6.48164	8.07241	CLM75_RS00355	12.1877	11.3205	11.969	12.2171	12.2852	12.1586	12.3038	11.9466	11.9016	12.1209	11.9872	12.1753	12.2553	11.9434	11.4705	12.2701	12.1519	11.9423	11.6976	12.2699
	CLM75_RS00360	6.66767	6.70824	6.51295	6.32517	6.87833	6.70946	6.49861	6.47271	6.59264	6.29526	6.57405	6.39366	6.89403	6.40934	6.9935	6.61993	6.51136	6.83983	6.50386	6.21168	CLM75_RS00360	5.30022	5.82821	5.45538	5.53863	5.58891	5.31639	5.71243	5.25015	5.44328	4.97481	5.45844	5.38229	5.67001	5.44136	5.83373	5.51884	5.59939	5.80359	5.6167	5.49586
	CLM75_RS00365	5.76293	5.92763	5.56044	5.59881	5.95239	5.45327	5.72109	5.509	6.02304	5.38216	5.1216	5.60445	6.00405	5.49233	5.75524	5.84315	5.35312	6.19054	5.56458	5.41928	CLM75_RS00365	4.8669	4.89361	4.6306	4.63814	4.61457	4.72831	4.77443	4.54715	4.81716	4.76859	4.85442	4.61362	4.24611	4.98296	4.57272	4.57428	4.73656	4.75232	4.69091	4.64871
	CLM75_RS00370	6.08713	6.16781	5.69745	5.73503	6.11436	5.67009	6.18317	5.7787	6.24911	5.65015	5.59887	5.99975	6.1679	5.76846	6.16888	5.94954	5.71817	6.33155	5.60626	5.87681	CLM75_RS00370	5.89702	5.91971	5.81932	5.37116	5.80557	5.91034	5.20628	5.47835	5.73969	5.98589	5.71378	5.77369	5.25166	5.83213	5.28356	5.35648	5.97556	5.66074	5.33287	5.48343
	CLM75_RS00375	5.48459	5.4911	5.07957	5.37724	5.42007	4.78499	5.81047	4.94618	5.82654	5.3487	5.17565	5.28695	5.57231	5.12821	5.44047	5.30368	5.37081	5.47083	4.63414	5.20529	CLM75_RS00375	7.10638	6.82375	7.15172	6.30663	6.3679	7.32582	5.98927	7.06068	7.11284	6.72054	7.05827	6.80811	7.00702	7.24881	6.18772	6.28076	7.11578	6.85469	5.97956	6.62305
	CLM75_RS00380	6.85052	7.25573	6.73861	6.62972	6.88756	6.56135	7.05183	6.55097	7.17521	6.49576	6.56763	6.86142	6.96278	6.73926	6.99747	6.97178	6.84056	7.06195	6.58455	6.71514	CLM75_RS00380	5.82888	5.95926	6.13757	5.63138	5.93567	6.21325	5.65122	6.0037	6.03928	5.97236	5.99372	5.85217	5.99392	5.96223	5.84898	5.75295	6.11582	6.01694	5.84079	5.69098
	CLM75_RS00385	8.17026	8.20909	8.17388	8.32608	8.03556	7.99674	8.41495	8.53728	8.06685	8.38601	7.51903	9.00466	8.35731	8.47008	7.97302	8.61921	8.10423	8.45381	8.07237	8.79978	CLM75_RS00385	7.31924	7.21691	7.55851	7.7669	6.95897	7.67995	7.3477	7.64631	7.73358	7.09591	7.46557	7.36002	7.45629	7.51818	7.73546	7.60974	7.74425	7.27308	7.71197	6.85551
	CLM75_RS00390	10.352	11.0536	10.6984	10.4249	10.3378	9.94621	10.4889	10.5198	10.9648	10.6265	10.2136	11.5508	10.8227	10.4045	10.1176	10.8458	10.2761	10.7588	10.1439	11.3877	CLM75_RS00390	8.4649	8.59903	8.76053	9.33629	8.53253	8.64211	9.3149	8.98834	8.98475	8.61053	8.92038	8.88372	8.89876	8.65318	9.28087	9.24407	9.05526	8.63544	9.37186	8.59991
	CLM75_RS00395	8.20426	8.02844	8.19978	8.13847	8.22106	8.1444	8.08249	8.39467	8.03548	8.08256	7.98211	8.04466	8.31401	8.27292	8.19734	8.21696	8.21814	8.22332	8.16895	7.94988	CLM75_RS00395	7.81959	7.79298	7.81524	8.00424	7.93188	7.80504	7.98085	7.92262	7.93615	8.00304	7.983	7.90624	8.13544	7.89132	7.89704	7.97771	8.02103	7.78405	7.87831	7.99831
	CLM75_RS00400	8.35111	8.49529	8.20303	8.31967	8.34291	8.48201	8.43805	8.42041	8.48161	8.10539	8.05174	8.21606	8.49002	8.38318	8.40132	8.36884	8.58345	8.24497	8.27471	8.24137	CLM75_RS00400	8.05682	7.88337	8.44372	8.05086	7.51735	8.60974	7.68	8.2895	8.26093	7.60327	7.82306	7.87535	8.06814	8.2643	8.36894	8.06884	8.39667	7.964	8.09201	7.59255
	CLM75_RS00405	8.23813	8.88922	8.34817	8.39954	8.34663	8.92176	9.00726	8.2103	8.6809	8.17366	8.46447	8.67514	9.28402	8.60868	8.42057	8.55153	8.40054	9.11959	9.00601	8.68404	CLM75_RS00405	7.36732	7.9613	7.676	7.91435	8.04473	7.28966	8.06342	7.47316	7.63367	7.55229	7.7901	7.75374	7.8128	7.68684	8.21755	8.09443	7.60836	8.13649	8.07035	8.30364
	CLM75_RS00410	8.59661	8.85963	8.93028	8.8318	8.66646	9.21834	8.95072	8.83493	8.91516	9.18982	8.79571	8.82516	8.92592	8.94005	8.4907	8.60267	8.6071	8.96049	9.38287	8.90046	CLM75_RS00410	8.02514	8.24811	8.11468	8.47045	8.01691	7.79807	8.59194	8.06944	8.20645	8.19841	7.98951	8.17138	8.28689	8.05859	8.59155	8.48849	8.21706	8.25531	8.65448	8.28652
	CLM75_RS00415	8.48349	9.05363	8.73672	8.84362	8.34141	8.98369	8.92722	9.05748	8.84327	8.72655	8.18337	9.3782	9.09935	8.99769	8.56931	9.17394	8.70874	8.95869	8.88841	9.16919	CLM75_RS00415	7.91733	8.26218	8.28045	8.15449	8.48025	7.92547	8.2377	8.25185	8.12872	8.14893	8.2841	8.37763	8.48992	8.06108	8.37246	8.25395	8.10995	8.25017	8.16854	8.63125
	CLM75_RS00420	7.23117	7.73456	7.62165	7.46559	7.28412	7.4891	7.7043	7.61696	7.56082	7.50637	6.99106	7.89098	7.83272	7.56995	7.48582	7.90556	7.20333	7.88424	7.52145	7.93293	CLM75_RS00420	6.95178	7.23743	7.1032	7.1847	7.11861	7.08555	7.27403	7.12415	7.11464	7.14294	7.08319	7.18734	7.24618	7.07275	7.36477	7.21273	7.31846	7.16281	7.22856	7.27893
	CLM75_RS00425	6.70223	7.16222	6.96232	7.06294	6.72196	6.92347	6.98464	6.86838	7.27333	7.08627	6.48151	7.02908	7.11259	6.84217	6.68258	7.16443	6.43195	7.18909	6.63337	7.18433	CLM75_RS00425	7.18259	7.1952	6.99876	7.02708	7.05328	7.23397	7.15288	7.17884	7.15441	7.23925	7.0451	7.11053	7.25581	7.16983	7.18214	7.07546	7.45657	7.04935	7.11212	7.04459
	CLM75_RS00430	6.06283	6.32766	6.13684	6.10025	6.18707	5.88169	6.32713	6.00648	6.46062	5.87896	5.92903	6.29128	6.3504	6.09443	6.06152	6.22975	5.77954	6.39233	5.79107	6.48725	CLM75_RS00430	6.15009	6.17063	6.08232	5.56487	6.37726	6.04837	5.86621	5.97651	6.00982	6.06447	5.98148	6.11534	6.24672	6.15727	5.47267	5.76043	5.97434	6.06709	5.78722	6.00119
	CLM75_RS00435	6.77226	7.19796	7.11209	6.7588	6.80118	6.68241	7.03511	6.88619	7.11522	6.72202	6.61552	7.25889	7.18188	6.92558	6.75245	6.84569	6.60341	7.29551	6.55738	7.65639	CLM75_RS00435	7.57938	7.66967	7.66141	7.3987	7.91691	7.62228	7.44912	7.70075	7.7551	7.72687	7.66747	7.72274	7.74875	7.63455	7.56661	7.53984	7.84797	7.86358	7.60013	7.82189
	CLM75_RS00440	7.04945	7.2068	7.3317	7.46861	7.09249	7.15957	7.2771	7.34207	7.37593	7.37969	7.03712	7.4022	7.21882	7.21623	7.07769	6.96793	6.92285	7.18568	6.95232	7.61794	CLM75_RS00440	8.38201	8.3977	8.43241	8.27906	8.6103	8.43614	8.29885	8.48268	8.54966	8.44231	8.52994	8.52019	8.39459	8.50764	8.03456	8.23769	8.52095	8.41253	8.16166	8.55457
	CLM75_RS00445	6.50341	6.0273	7.20178	7.28951	6.04026	7.09478	5.9041	6.60763	5.51385	7.81077	6.05277	7.57254	6.26469	6.49875	5.96186	7.19747	6.10582	5.9856	7.25325	6.75261	CLM75_RS00445	8.67264	7.96246	8.7124	8.85388	8.43023	9.23774	8.75312	9.19683	8.70342	8.56151	8.51953	8.7582	9.04705	8.46985	8.88551	8.60413	9.09964	8.18248	8.91861	8.17689
	CLM75_RS00450	6.09592	6.39109	7.93578	8.21066	5.38477	7.58607	5.87453	7.54053	6.36662	8.40163	6.11988	8.3992	6.24453	7.31655	5.26574	6.07703	5.63449	6.02891	7.10468	8.99338	CLM75_RS00450	11.479	10.332	11.0913	11.3922	10.7878	11.7435	11.2945	11.6164	11.4694	11.3451	11.4912	11.353	11.7495	11.252	11.0907	11.4765	11.903	11.2679	11.4398	10.9073
	CLM75_RS00455	5.51724	6.04905	6.98776	7.43105	5.0008	7.55641	6.00133	6.95364	5.83893	7.7515	5.33309	7.7218	6.29613	7.08112	4.82574	6.12115	5.70268	5.93162	7.24919	7.55154	CLM75_RS00455	11.0735	10.0071	10.555	10.7374	10.1497	10.9391	10.4848	10.9847	10.8734	10.7744	10.8168	10.9245	11.1737	10.5941	10.3749	10.704	11.1628	10.4781	10.548	10.3191
	CLM75_RS00460	7.68359	6.58387	7.61631	7.84531	7.81692	8.52508	6.78859	7.6307	6.79092	8.03581	7.03823	7.44534	6.85036	7.91098	8.11392	7.44781	7.50795	6.80399	8.58188	6.68154	CLM75_RS00460	7.31975	7.30122	7.9791	7.23219	6.89154	8.02051	6.54043	7.90305	7.99017	7.30096	7.61346	7.01342	7.58415	7.98986	7.70015	7.12346	7.99664	7.59437	7.67955	6.93242
	CLM75_RS00465	6.93394	6.93528	6.84007	6.68245	6.99429	7.01229	6.82321	6.63018	6.90646	6.64859	6.63961	6.74257	7.15513	6.80251	6.9182	7.03767	6.71917	7.30828	7.14302	6.76674	CLM75_RS00465	5.86831	6.03593	5.85943	5.92211	5.8305	6.08689	6.02905	5.85551	5.74384	5.9735	5.56072	5.92874	5.93757	5.94435	6.12854	6.13637	5.87734	6.02115	6.10343	5.73623
	CLM75_RS00470	5.57286	6.84	5.93068	5.60004	5.51138	5.17767	6.48383	5.54021	6.6962	5.83661	5.24009	6.25635	6.46193	5.62582	5.31892	6.15811	5.45292	6.86671	5.15586	6.49319	CLM75_RS00470	6.35223	5.77104	5.86308	6.24544	5.8073	6.53272	6.16866	6.18407	6.16819	5.99148	6.13995	5.8986	6.27352	6.34413	5.76571	6.33456	6.43641	6.01431	6.17532	5.84229
	CLM75_RS00475	6.10813	7.50631	6.57389	6.51647	6.28968	5.99469	7.48917	6.52402	7.43557	6.717	6.09757	7.25365	7.05315	6.50229	6.3005	7.00898	6.17907	7.43586	5.8035	7.3913	CLM75_RS00475	6.5065	6.28785	6.49614	6.57125	6.34182	6.86374	6.52896	6.58446	6.61052	6.47893	6.56396	6.60777	6.79081	6.67483	6.51859	6.56144	6.79206	6.46624	6.57923	6.36202
	CLM75_RS00480	7.04522	7.36988	7.17888	6.68794	7.00627	6.12233	7.69614	6.92082	7.15834	6.72952	6.50888	7.61555	7.02319	6.74769	6.70986	7.62712	6.8283	7.60713	6.27166	7.71383	CLM75_RS00480	5.86619	5.9639	5.84536	5.96505	5.83391	6.00673	5.95851	5.85228	6.02953	5.71659	5.94806	5.90511	5.74306	5.85337	6.0755	6.01439	6.09916	6.04456	6.26197	5.82268
	CLM75_RS00485	7.46784	7.51094	7.44185	7.37738	7.30315	6.78272	7.54186	7.47421	7.47804	7.20744	6.97267	7.89834	7.31776	7.35498	7.11769	7.77562	7.44433	7.57514	6.71425	7.86047	CLM75_RS00485	6.70685	6.37736	6.53895	6.474	6.32921	6.78062	6.4343	6.61908	6.70468	6.20215	6.44697	6.49861	6.84287	6.66175	6.49777	6.42587	6.73998	6.48042	6.59062	6.26183
	CLM75_RS00490	6.4491	7.44125	6.77221	6.74861	6.25997	7.08461	7.02624	7.03758	7.11012	6.77682	5.96063	7.2848	7.21364	7.12459	6.30012	7.16241	6.35305	7.30608	6.95173	7.24146	CLM75_RS00490	6.27217	6.33716	6.37662	6.47278	6.10236	6.46909	6.45098	6.41559	6.41066	6.30823	6.17194	6.0927	6.29237	6.24899	6.65644	6.34555	6.64597	6.39516	6.47994	6.19952
	CLM75_RS00495	5.259	6.50511	6.03124	5.7097	5.28479	5.26325	6.5845	5.62333	6.5188	5.99312	5.25462	6.32788	6.27758	5.61931	5.25876	6.01966	5.38091	6.5195	4.96288	6.78203	CLM75_RS00495	6.78198	6.75366	6.68484	6.45885	6.7843	6.85976	6.40037	6.80513	6.68806	6.58196	6.69014	6.7142	6.95357	6.72282	6.52176	6.47643	6.95034	6.60603	6.59945	6.77362
	CLM75_RS00500	7.75006	7.63339	7.60334	7.37165	7.81495	6.81084	7.4644	7.57496	7.54681	7.39324	7.59836	7.78512	7.21089	7.41974	7.54728	7.66424	7.63271	7.60291	6.54379	8.05163	CLM75_RS00500	8.41142	7.73698	8.35908	8.2021	7.59014	8.85794	7.60897	8.6873	8.65589	7.85276	8.38456	8.13029	8.37793	8.51826	7.74296	7.90101	9.04978	7.99384	8.08967	7.59652
	CLM75_RS00505	6.4344	6.81618	6.4273	6.4619	6.31322	7.18682	6.9349	6.51641	6.75763	6.49051	6.0693	6.74537	6.99578	6.7228	6.34073	6.49956	6.69832	7.09162	7.10626	6.77262	CLM75_RS00505	6.46361	6.94166	6.9131	6.70218	6.63565	6.37084	6.91281	6.88652	6.86447	6.62509	6.75315	6.87487	7.03191	6.62574	7.46304	6.86433	6.94972	7.01446	6.92834	7.0152
	CLM75_RS00510	4.77505	4.82212	4.63663	5.12391	4.98177	5.09048	4.41344	4.88359	4.57127	4.5674	4.07508	4.43689	4.40757	4.87962	4.95232	4.74931	4.84583	4.85139	4.97681	4.53265	CLM75_RS00510	4.3618	5.23493	4.96295	4.69376	4.60862	4.85732	5.04137	4.62586	4.61759	4.12121	4.47458	4.62681	5.39805	4.80611	5.69151	5.00227	4.96711	4.85359	5.04367	4.58029
	CLM75_RS00515	6.19415	6.70897	6.46509	6.80018	6.30303	6.73692	6.64678	6.59961	6.97512	6.61698	5.80567	6.43936	6.76136	6.60228	6.41449	6.28402	5.8389	6.81065	6.50707	6.36081	CLM75_RS00515	5.84622	6.1419	5.90437	5.79225	6.09173	5.89483	6.08994	5.82823	5.93455	5.90278	5.91223	5.86781	6.16319	5.90143	6.12018	5.88389	6.0021	5.9904	5.94014	5.82637
	CLM75_RS00520	5.74739	6.35536	6.08922	6.91789	5.45546	6.77332	6.79165	6.20871	6.82179	6.93959	5.62618	6.4272	7.08151	6.47076	5.95995	5.7666	6.18022	6.5909	6.55661	6.60752	CLM75_RS00520	5.9387	6.16008	5.80675	6.08243	5.80384	6.12725	6.10757	6.09807	6.03081	6.01036	5.79734	5.63562	5.54358	5.72727	6.5026	6.24457	6.12023	5.94964	6.36911	5.97033
	CLM75_RS00525	5.78846	6.24591	6.03051	6.40202	5.69865	6.70761	6.68136	6.06896	6.4126	6.26659	5.42858	6.19139	6.87023	6.43044	5.99071	6.31264	6.21904	6.75671	6.67313	6.09775	CLM75_RS00525	5.18002	5.98585	5.55118	5.63939	5.40311	5.48192	5.71611	5.33416	5.40048	5.50434	5.18314	5.15893	5.45268	5.55767	6.0581	5.78217	5.17647	5.49312	5.77656	5.528
	CLM75_RS00530	5.43926	5.4797	5.60037	6.69484	5.52196	6.53378	6.20173	6.20148	6.02773	6.82327	4.81609	6.22457	5.80224	6.18695	5.16726	5.9901	5.22885	6.07575	5.93776	6.03342	CLM75_RS00530	6.00775	6.30344	6.03136	6.21798	5.65007	5.91199	6.26861	5.92633	6.06484	6.31895	5.60926	6.12002	6.04815	5.97726	5.96784	6.16823	5.91083	5.82838	6.29835	5.51431
	CLM75_RS00535	3.70409	4.12721	3.56436	3.87032	3.87789	3.44053	3.95676	4.08991	4.24275	3.57398	3.89741	4.02511	3.86191	3.92937	3.8935	4.05434	4.12864	3.91912	3.41068	4.38368	CLM75_RS00535	3.5882	3.75344	4.01123	3.28077	3.64339	4.00954	3.60738	3.67379	3.70115	3.18185	3.71295	3.80747	3.89797	3.84227	3.02483	3.2954	4.28866	3.77666	3.24296	3.35373
	CLM75_RS00540	10.6367	10.8424	10.3314	11.1454	10.7493	10.7559	10.5238	10.5755	11.2571	10.5741	10.9683	10.4922	10.5841	10.1814	11.0073	10.3022	10.8122	10.4171	10.0167	10.7714	CLM75_RS00540	9.18465	8.75768	9.32514	9.29447	9.31459	9.33732	9.28994	9.60396	9.20541	8.86773	9.20811	9.22146	9.01734	9.49744	9.52692	9.13333	9.65012	8.89588	9.123	9.16803
	CLM75_RS00545	8.71601	8.49529	8.3736	8.78636	8.46351	8.89973	8.97773	8.88796	8.63905	8.77514	7.17617	8.46839	9.06958	9.03728	8.24748	8.43746	8.60473	8.67901	8.95978	8.29326	CLM75_RS00545	6.76688	7.10813	7.14724	7.22034	6.81478	6.90192	7.24627	7.1706	7.21142	7.00585	7.04215	6.81907	7.29372	7.04659	7.8352	7.14839	7.05889	7.05499	7.42805	6.88771
	CLM75_RS00550	6.81192	6.65957	6.98701	7.2796	6.96874	6.73933	6.68466	6.86557	6.66776	6.91272	6.91294	7.02946	6.80371	6.78279	6.74025	6.73163	6.78203	6.92129	6.81107	6.73099	CLM75_RS00550	5.58391	5.56256	5.53298	5.77714	5.68819	5.26046	5.88923	5.27388	5.55453	5.76577	5.54729	5.57566	5.43921	5.31066	6.03606	5.69893	5.46016	5.66275	5.87027	5.84836
	CLM75_RS00555	3.73142	4.23418	3.78138	4.73172	3.88611	3.94205	4.39475	3.91319	4.59515	4.24653	3.9566	4.20415	4.34657	4.0148	3.8508	3.72266	3.84116	4.21801	3.92829	3.83887	CLM75_RS00555	3.18683	3.43304	2.99876	3.44602	3.73366	2.92809	3.71438	2.93197	3.09678	3.64094	2.71183	3.05893	3.13826	3.09494	3.68783	3.53997	2.93549	3.22295	3.71456	3.52731
	CLM75_RS00560	5.04814	5.53857	5.37029	5.91471	5.09119	5.19449	5.93448	5.49905	5.77066	5.75429	5.22696	5.40507	6.01669	5.44962	5.25486	5.36664	5.16479	5.82246	5.33148	5.31491	CLM75_RS00560	5.60528	5.83875	5.57584	5.54018	5.69383	5.47449	5.48845	5.40034	5.53428	5.69617	5.56483	5.35242	5.50532	5.67509	5.7222	5.45324	5.6778	5.81392	5.56918	5.72703
	CLM75_RS00565	5.50936	5.51084	5.13092	5.20428	5.55496	5.28656	5.39663	5.18267	5.5	5.00532	5.42182	5.3716	5.12791	5.00382	5.53211	5.46971	5.45356	5.03176	4.96754	5.57679	CLM75_RS00565	4.99808	4.74291	4.98655	4.64539	5.17779	4.99975	4.77795	4.97151	5.15107	4.76336	4.84262	4.45698	4.80359	4.72254	4.72927	4.71342	5.17647	5.06476	4.83431	4.94922
	CLM75_RS00570	5.24432	5.58452	5.30775	6.60093	5.38187	5.58065	5.6091	5.42263	5.61193	5.95159	5.6472	5.4027	5.33947	5.36304	5.33966	5.25142	5.37216	5.16251	5.49449	5.27039	CLM75_RS00570	5.63302	5.79731	5.38101	5.24509	6.09031	4.7233	6.13535	5.18424	5.02098	5.6216	5.46725	5.99739	5.59306	5.16075	5.27606	5.38581	5.05729	5.70058	5.11621	6.50575
	CLM75_RS00575	5.24326	5.66472	5.21563	5.40064	5.26393	4.91568	5.37772	5.08568	5.34524	5.2779	5.2622	5.34352	4.97366	5.08593	5.29258	5.12342	5.3681	5.25334	4.74548	5.44648	CLM75_RS00575	5.93533	5.45244	5.48881	5.36502	5.60494	5.69449	5.89168	5.55435	5.54026	5.82465	5.55969	5.84992	5.96131	5.65983	5.41576	5.42715	5.72636	5.74	5.28237	5.90073
	CLM75_RS00615	6.14587	6.42298	5.98749	6.00028	6.25205	6.14573	6.19942	6.05606	6.31315	5.9381	5.98284	6.31474	6.28457	6.1664	6.33484	6.3179	6.56375	6.28127	6.09452	6.39548	CLM75_RS00615	5.7801	5.49504	6.03028	5.60856	5.76065	6.1282	5.47003	5.94805	5.99027	5.43044	5.88456	5.7855	6.01222	5.8155	6.04271	5.68011	6.17851	5.81634	5.64895	5.63446
	CLM75_RS00620	4.63573	4.77627	4.90244	5.30091	4.7099	5.43402	4.87317	4.8822	4.64786	5.72601	4.36596	4.89112	4.72763	5.04237	4.94073	5.33829	4.75759	4.92528	5.79172	4.91787	CLM75_RS00620	4.96804	4.68695	4.80253	5.02259	4.97837	5.03352	4.53685	4.84561	4.96867	4.72892	5.02515	4.90973	4.2615	5.06469	4.46465	4.80312	4.51325	4.95592	4.649	4.86784
	CLM75_RS00625	3.72237	3.04208	3.61202	4.58345	3.58688	4.61914	2.90142	3.58752	3.18647	4.96293	2.99924	3.78115	2.81562	4.05041	3.49181	3.78234	3.6781	3.323	5.26775	3.29891	CLM75_RS00625	3.85123	3.60212	3.6153	3.51097	4.13799	3.13077	3.74715	3.56554	3.74949	3.71859	3.52753	3.33454	2.36258	3.80312	3.20947	3.8628	3.04163	3.4612	3.62876	3.9451
	CLM75_RS00630	8.16024	7.68988	7.9567	7.69784	8.19884	7.69539	7.27363	7.99099	8.05477	7.70471	7.89973	7.84186	7.54297	8.02772	8.24425	7.55931	8.07196	7.24853	7.78447	7.92372	CLM75_RS00630	7.48798	6.95447	7.51184	7.69324	6.45008	8.0113	7.45987	7.16914	7.19178	6.46693	6.9521	7.43468	7.75419	7.48794	7.49732	7.62417	8.14447	7.15972	7.6089	7.0297
	CLM75_RS00635	3.1946	3.45679	3.40665	3.06054	2.98763	3.38915	2.98594	3.35456	3.37485	2.83625	3.20539	3.48738	3.61459	3.23528	3.56156	3.18908	3.36174	3.39097	3.23247	3.47576	CLM75_RS00635	2.44379	2.21943	2.51481	2.79873	2.12443	2.47705	2.31707	2.3524	2.27383	1.88893	2.16957	2.55081	3.54259	2.64155	2.70543	2.59471	3.3428	2.31284	2.96411	1.78481
	CLM75_RS00640	4.47792	4.76692	4.5977	4.27818	4.48867	4.56161	4.4553	4.50585	4.43763	4.39312	4.26533	4.61085	4.77635	4.47679	4.56775	4.76004	4.44986	4.79427	4.35541	4.53879	CLM75_RS00640	4.19814	4.17683	4.20379	4.19189	4.41305	4.33086	3.7967	4.17298	4.37523	4.45197	4.5859	4.27118	4.8853	4.10949	4.18911	3.9648	4.41971	4.16447	4.09303	4.22079
	CLM75_RS00645	2.15275	2.36665	2.24624	2.35315	2.2626	2.55443	2.45215	2.12685	2.42589	2.03208	2.38886	2.11944	2.54014	2.17886	2.30885	1.91361	2.3012	2.16695	2.10592	2.33724	CLM75_RS00645	1.47382	1.74866	1.65232	1.54497	1.4399	2.15138	1.68129	2.05376	1.61505	1.2468	1.717	1.1481	1.63627	1.37392	2.2946	1.38894	2.56021	1.9393	1.51968	2.27786
	CLM75_RS00650	1.35802	0.694165	1.11229	0.721879	0.829685	0.99038	1.24816	0.85353	1.54264	0.803661	1.13567	1.01477	2.07593	1.26702	1.30932	0.987869	1.14688	1.48607	1.60589	0.783469	CLM75_RS00650	1.14068	1.2558	1.31153	1.04597	1.49255	1.74004	1.00056	1.09003	1.3021	0.522957	0.620818	1.1481	1.53863	0.129664	0.827434	0.814533	1.74383	1.42125	1.22103	0.726514
	CLM75_RS00655	5.88898	6.92145	6.21479	6.06917	5.85952	6.51311	6.93142	6.28807	7.11081	6.16676	5.78791	6.60176	6.89669	6.07164	5.92215	6.75088	6.36022	6.92047	6.16162	6.71481	CLM75_RS00655	6.65122	6.44154	6.75588	6.34678	6.27011	6.66526	6.06993	6.73716	6.59364	6.37998	6.60742	6.45416	6.47502	6.67916	6.37145	6.28734	6.63984	6.2959	6.41484	6.29422
	CLM75_RS00660	7.60592	7.12667	6.75285	6.65736	7.43913	6.58706	7.13626	6.74943	7.32471	6.28173	7.56685	6.3799	7.19182	5.81838	7.42993	7.0908	7.95023	7.21108	5.90595	7.6422	CLM75_RS00660	7.96242	7.25707	7.81163	7.58408	7.28116	8.29984	7.57869	8.07638	7.8906	7.7505	7.73625	7.77552	8.11864	8.06564	7.55348	7.45214	8.15014	7.6776	7.63409	7.31051
	CLM75_RS00665	3.57926	3.74273	3.56032	3.26909	3.6102	3.11557	3.47728	3.00171	4.04884	3.04753	3.60687	3.18015	4.77304	3.08881	3.57911	3.49331	3.49424	3.8397	3.02018	3.30252	CLM75_RS00665	3.49234	3.18873	3.58618	3.63272	3.50071	3.85559	3.25914	3.64421	3.49715	3.2281	3.48046	3.42794	3.41082	3.9715	3.17761	3.4115	3.77085	3.56846	3.25418	3.67678
	CLM75_RS00670	3.59919	3.20599	3.39761	2.85002	3.25191	2.70043	3.5124	3.07661	3.34699	2.7518	3.27305	3.25546	4.45581	3.01502	3.53098	3.12044	2.9083	3.82749	2.29571	3.50428	CLM75_RS00670	3.89076	3.21055	3.46661	3.12349	3.1037	4.21613	3.15444	3.59095	3.44959	3.67473	3.27012	2.95397	2.24368	3.28313	3.22514	3.30635	3.93511	2.87843	3.1195	3.00801
	CLM75_RS00675	2.98852	3.47986	3.2894	2.60345	3.04254	2.92501	3.47982	2.92812	3.46575	2.59489	2.94746	3.16348	3.76867	2.71556	2.84476	3.1926	2.92681	3.48059	2.57752	3.18606	CLM75_RS00675	2.73192	2.26647	2.77956	2.53702	2.57869	2.99609	2.29754	2.40184	2.65988	1.59155	2.38935	2.67794	2.1141	2.94473	2.48886	2.48334	3.16633	2.47481	2.62248	2.3753
	CLM75_RS00680	5.10845	5.40213	5.18049	5.13748	4.84101	5.54657	5.67534	5.00105	5.33582	5.30492	4.55329	5.28053	5.50612	5.16361	4.97994	5.43666	4.76789	5.6774	5.60102	5.27959	CLM75_RS00680	4.22931	4.48597	4.29301	4.1312	4.10172	4.08174	4.55753	4.05713	4.01322	4.04574	3.9355	3.61434	3.99319	4.28458	4.36208	4.24357	4.2729	4.19826	4.32231	4.32202
	CLM75_RS00685	4.00716	3.70994	3.21419	3.09573	3.89969	3.49014	3.43346	3.48493	3.69227	3.28704	3.02445	3.25021	3.39119	3.59743	3.86926	3.73237	3.82744	3.43992	3.85978	3.20549	CLM75_RS00685	2.98247	2.99563	2.69477	3.04231	2.57055	3.19728	2.69101	2.79738	2.76177	2.99831	2.66667	2.31035	2.41855	2.87091	3.07757	3.0858	3.26525	3.04453	2.9811	1.92014
	CLM75_RS00690	3.59919	3.35317	3.83926	3.3146	3.71534	4.06847	3.41502	3.18439	3.65488	3.49239	3.76693	3.23434	3.3955	3.32818	3.83211	3.49045	3.555	3.62063	3.55076	3.97643	CLM75_RS00690	3.71316	3.87529	3.59498	3.51731	3.50926	3.42097	3.53415	3.91886	3.80026	3.75064	3.84718	3.69171	2.36258	3.58962	3.59439	3.5584	4.24084	4.22219	3.98937	3.55728
	CLM75_RS00695	4.49042	3.80616	3.6657	3.73851	4.44857	3.93153	3.84903	3.68329	3.89187	3.71303	3.46151	3.70643	3.91089	3.9427	4.2154	4.17503	4.26873	3.98028	3.85978	3.78822	CLM75_RS00695	3.8194	3.67017	3.73159	3.71497	3.57991	4.06205	3.61134	3.79312	3.70328	3.5828	3.73863	4.02238	3.38296	3.45464	3.11169	3.69798	4.26893	3.56846	3.67543	3.43991
	CLM75_RS00700	4.75003	3.7748	4.05578	4.95697	4.61592	4.57384	3.70033	4.62375	3.888	5.21468	4.17011	4.27567	3.46274	4.36241	4.82048	4.58207	4.67787	3.68392	4.88376	4.06419	CLM75_RS00700	3.99808	3.5706	4.11072	4.2596	3.96865	4.22147	3.83447	4.29457	4.15573	3.80759	4.18541	3.56035	3.51718	4.25587	4.08131	3.82332	4.14451	4.04985	3.83533	3.94056
	CLM75_RS00705	4.8504	4.45047	4.68942	5.31889	4.91511	4.88438	4.51217	4.68248	4.49037	5.42896	4.48099	4.97468	4.09434	4.75239	4.99215	5.13446	4.23496	4.85225	4.94291	4.79883	CLM75_RS00705	4.78385	4.44362	4.63345	4.41703	4.24929	4.88337	4.46205	4.72895	4.65889	4.37183	4.37281	4.36234	3.85805	4.80413	4.25166	4.33328	4.77344	4.37119	4.18094	4.19814
	CLM75_RS00710	4.92596	5.34987	5.24615	5.05318	5.21152	5.02367	5.26751	5.06865	5.02663	5.25285	4.97137	5.37523	5.14848	5.04237	5.18046	5.31423	5.2281	5.22967	5.16806	5.3822	CLM75_RS00710	5.16973	4.97163	5.03586	4.8982	5.05186	5.22724	4.75665	5.1064	5.21534	4.88864	5.32916	4.70851	4.9906	5.18684	4.80942	4.90747	5.14434	5.01084	4.90723	4.99593
	CLM75_RS00715	5.40194	4.50546	4.90723	4.63219	5.3944	5.11487	4.27862	4.95943	4.25679	4.71715	4.91857	4.69829	4.93718	4.97353	5.41417	5.1011	5.16946	5.11018	5.15688	4.61923	CLM75_RS00715	3.76574	3.93184	3.52303	3.99251	3.72635	3.5368	4.12231	3.41825	3.68611	3.4846	3.7495	3.89731	4.11675	3.35528	4.15679	3.74702	4.10943	3.75412	3.91705	3.63803
	CLM75_RS00720	7.35472	6.59448	6.97756	6.98346	7.44863	7.27375	6.55684	7.20995	6.70207	7.06696	7.20224	6.47469	7.09647	6.99965	7.57268	6.88324	7.17438	6.8952	7.11022	6.37417	CLM75_RS00720	6.0901	6.40074	5.94107	6.19395	6.13102	6.01546	6.2661	5.85188	5.98238	5.98364	5.88292	6.06873	6.1384	6.03078	6.14716	6.10262	6.13557	6.06658	6.22572	6.28798
	CLM75_RS00725	7.2617	7.12227	7.05863	6.70513	7.27528	6.79264	6.87279	6.97305	7.05335	6.82777	7.13171	6.97718	6.90124	6.84014	7.10973	7.22569	7.15724	7.14426	6.86325	7.19166	CLM75_RS00725	6.58434	6.27841	6.18981	6.48091	6.31649	6.5187	6.4038	6.31536	6.46107	6.31806	6.36806	6.43328	6.25443	6.44931	6.47502	6.34688	6.68223	6.32805	6.50247	6.17267
	CLM75_RS00730	7.00814	6.41433	6.29302	5.85179	7.05413	5.56779	6.15804	6.36478	6.3473	5.57524	6.96293	6.3787	5.84145	5.81941	6.53145	6.57811	7.11226	6.11432	5.3977	6.77685	CLM75_RS00730	5.50241	5.37191	5.47934	5.43113	5.65777	5.36864	5.4347	5.50379	5.6193	5.48701	5.52953	5.53285	5.81781	5.50374	5.39166	5.13332	5.96824	5.53118	5.37268	5.69503
	CLM75_RS00735	5.68196	4.80578	5.17786	4.73619	5.82006	4.44953	5.03889	5.39266	4.94658	4.7804	4.55452	4.83259	4.46404	4.96982	5.69559	5.80567	5.67338	4.90633	4.17381	5.13812	CLM75_RS00735	8.29839	7.73207	8.19934	6.75644	7.19673	8.58597	5.872	8.25743	8.432	7.59887	8.30682	7.74318	7.94254	8.48493	6.48807	6.6822	8.56955	7.89884	6.59587	7.17306
	CLM75_RS00740	6.72998	6.71555	6.40323	6.00815	6.86489	6.10604	6.99687	6.43715	6.71048	5.90852	5.71734	6.7931	6.63132	6.12941	6.84989	7.2216	6.7866	7.13314	5.95252	6.83446	CLM75_RS00740	6.08646	6.60122	6.97704	5.52218	6.09953	6.66133	4.87999	6.74153	7.01155	6.31628	6.70836	5.61855	6.44164	7.12528	5.68586	5.21911	6.45748	6.65452	6.14473	6.03353
	CLM75_RS00745	4.20645	5.23931	4.23896	3.42107	4.33318	3.62427	5.11837	4.13966	5.16816	3.46527	3.69698	4.4461	4.69829	3.77186	4.38317	5.06791	4.54519	5.67788	3.31522	4.48097	CLM75_RS00745	2.86263	2.92994	2.37875	2.78829	2.51224	2.92809	2.50765	2.75304	2.82591	2.76723	3.08801	2.45938	2.52436	3.00118	3.25598	2.74714	3.06012	2.62041	2.73892	2.86195
	CLM75_RS00750	5.68817	6.81821	5.87967	5.07891	5.64562	5.33847	6.66473	5.67406	6.75162	5.1859	5.17082	6.09363	6.85858	5.41109	5.76841	6.39715	5.85203	7.45696	5.26491	5.90263	CLM75_RS00750	4.54991	4.40314	4.47405	4.51687	4.58052	4.58247	4.28242	4.50252	4.73602	4.4649	4.52184	4.32073	5.12282	4.69072	4.41769	4.24783	4.79015	4.52115	4.63404	4.21328
	CLM75_RS00755	6.25663	7.02917	6.35035	5.31963	6.09383	5.77035	6.55503	6.00136	6.96782	5.75078	5.92378	6.21651	7.0569	5.87758	6.2427	6.62646	6.10175	7.43514	5.69321	6.24961	CLM75_RS00755	5.17546	5.02663	5.04445	5.00353	4.82084	5.22015	4.89144	5.02053	5.17666	5.20231	4.99197	5.09201	5.35567	5.05472	5.11717	5.03472	5.41419	5.08096	5.22789	5.15531
	CLM75_RS00760	6.12312	4.91475	5.30533	4.86208	6.13288	4.08566	4.61383	4.70311	4.98083	4.55057	5.96202	4.7401	4.57835	4.10394	6.0744	5.00917	5.94532	4.64221	3.57233	5.38731	CLM75_RS00760	6.83541	5.53833	6.35347	5.66173	6.01206	7.12167	5.23223	6.48813	6.54564	6.12684	6.69577	6.25018	6.54897	6.69368	5.06588	5.52237	6.81945	6.28152	5.42266	6.07763
	CLM75_RS00765	8.81648	8.44129	8.74665	8.4758	8.92245	9.34424	8.46599	9.2045	8.50701	8.6585	8.30095	8.44559	8.52951	8.88673	9.06417	8.67656	8.79124	8.31638	9.08719	8.40998	CLM75_RS00765	7.95128	8.67896	8.50092	8.30688	8.29517	7.88415	8.43792	8.20119	8.31911	8.2607	8.0775	8.48005	8.55379	8.22374	8.51154	8.41452	8.33111	8.67839	8.47528	8.63336
	CLM75_RS00770	6.1515	5.58824	6.1011	6.20304	5.9201	6.93721	5.77785	5.71995	5.81743	6.21411	6.03339	5.47876	5.53764	5.596	5.76129	5.70995	5.97319	5.60974	6.08276	5.89547	CLM75_RS00770	7.35601	6.28414	6.58532	6.42428	6.53778	7.20351	6.2811	6.78304	6.82308	7.17133	6.89696	7.04176	6.88072	6.89981	5.74955	6.32719	6.88638	6.78071	6.15375	6.80519
	CLM75_RS00775	4.7321	4.75562	5.29076	5.00403	4.83678	5.7733	4.80905	4.59347	4.89042	4.94587	5.14888	4.75686	4.9268	4.63648	4.83203	4.7987	4.54519	4.77259	5.00315	4.96765	CLM75_RS00775	6.44714	5.34313	5.86126	5.7424	5.69663	6.61646	5.30252	6.15357	6.26138	5.89204	6.10229	6.0946	6.31835	6.06924	5.10875	5.55027	6.57221	5.91505	5.5596	5.92737
	CLM75_RS00780	4.29053	4.5874	4.63855	4.59825	4.24866	5.56983	4.67821	4.12562	4.678	4.61522	4.74962	4.82907	4.52626	4.40981	4.28426	4.56177	4.30597	4.54754	4.7056	4.78598	CLM75_RS00780	5.61458	4.8464	5.31596	5.08151	5.31935	5.69001	4.74768	5.73706	5.65781	5.18873	5.72576	5.54818	5.92313	5.37081	4.99453	4.79925	5.92476	5.09099	4.91521	5.29528
	CLM75_RS00785	2.94248	3.44277	3.57643	2.98374	2.67019	4.19177	3.52964	3.05701	3.41834	2.78234	3.9622	3.44204	3.36945	2.73758	2.9905	3.25122	2.83179	3.08875	3.20512	3.18214	CLM75_RS00785	5.04138	3.93329	4.44514	3.67868	4.71586	4.62336	4.01874	4.6978	4.63783	4.52481	4.63166	5.0397	5.25166	4.32661	2.87395	4.05032	4.64767	4.42134	3.68376	4.7299
	CLM75_RS00790	4.01953	5.08464	4.35787	4.51493	4.42997	4.59667	5.10529	4.28361	5.32729	4.54572	3.97334	4.16562	5.36606	4.61879	4.18626	4.21716	4.01559	5.31524	4.35363	4.84044	CLM75_RS00790	5.2609	5.04294	4.64338	4.61173	5.01033	5.43905	4.90763	4.79268	4.79229	4.75812	4.86944	5.46542	5.64676	4.57228	4.90494	4.77876	5.69121	4.78729	4.83804	4.70869
	CLM75_RS00795	7.848	7.79168	8.07053	7.72351	7.71111	7.72996	7.52308	7.92124	7.74512	7.56472	7.75972	7.97873	7.70034	8.03407	7.75244	7.75208	7.54602	7.57788	7.63654	8.2066	CLM75_RS00795	8.38064	7.91306	7.87863	8.2545	7.97435	8.60813	8.30864	7.97785	7.91246	7.94364	7.84624	8.45881	8.68437	7.88688	8.4661	8.32331	8.71955	7.98513	8.24385	7.85062
	CLM75_RS00800	6.32002	7.02113	6.641	6.69942	6.22748	7.08461	7.08199	6.88202	7.00157	6.49282	6.25228	6.8849	7.20936	6.8773	6.3745	6.79906	6.74574	6.77749	6.78985	6.79972	CLM75_RS00800	5.98249	6.30005	6.16885	6.25495	5.98091	6.03681	6.41574	6.1493	6.06318	5.94954	5.9637	6.26207	6.34747	5.94974	6.7703	6.30109	6.37681	6.18836	6.43964	6.0568
	CLM75_RS00805	5.34803	5.93642	5.45331	5.24716	5.23207	5.27245	5.71248	5.47341	5.975	5.3394	5.0938	5.62995	5.82558	5.48389	5.19109	5.57876	5.41409	5.58818	5.20206	5.54511	CLM75_RS00805	5.04514	5.20807	5.23946	5.12677	4.97221	5.36301	5.18384	5.20212	5.21309	4.86688	4.93121	5.22461	4.91479	5.10871	5.46938	5.33258	5.38699	5.26939	5.38423	4.92183
	CLM75_RS00810	5.3042	5.61245	5.17786	4.89441	5.28686	4.89308	5.13376	5.17814	5.47061	4.79817	5.0904	5.31111	5.19742	5.21944	5.36878	5.36274	5.64739	5.20561	4.87635	5.19074	CLM75_RS00810	3.86548	4.02506	4.54085	4.30793	3.9278	4.70182	4.17143	4.46178	4.40178	3.91517	4.11712	4.5733	4.11675	4.22361	4.71823	4.31713	4.26893	3.92981	4.62542	3.76161
	CLM75_RS00820	7.71929	5.51587	6.43615	7.08784	7.55333	6.78827	5.43113	6.70645	5.68386	6.94513	6.54136	6.74491	5.43883	7.65773	7.6934	6.15811	7.79655	5.44993	7.97336	5.64313	CLM75_RS00820	3.97724	4.23594	4.07552	5.19754	3.53459	4.47635	5.21672	3.88607	3.9819	3.74534	3.54427	4.39046	5.06262	3.91018	5.64275	5.21983	5.19958	4.21487	5.36364	4.12397
	CLM75_RS00825	6.36725	4.66694	5.40114	5.96457	6.36457	6.14983	4.63105	5.76443	4.98324	5.95708	5.14642	5.40625	5.2097	6.41174	6.61493	5.1884	6.2066	4.93426	7.09566	4.71725	CLM75_RS00825	3.83106	3.56308	3.71015	4.40169	2.6881	4.02794	4.38316	2.87582	3.16656	2.65884	2.79112	4.25088	4.63666	3.67451	5.09176	4.38584	4.50989	3.35866	4.73964	3.06753
	CLM75_RS00830	5.19935	4.62927	5.01899	5.2067	5.11467	5.80363	4.83603	5.22828	4.99586	5.29051	4.32596	4.89953	5.23996	5.28744	5.0784	5.03295	5.43299	5.00877	6.02415	4.58106	CLM75_RS00830	4.07117	4.0958	4.10046	4.11875	3.76253	3.98046	3.74355	4.11082	4.20631	4.0671	4.11151	4.16305	4.67163	3.82283	4.69028	4.17054	4.01309	3.65213	4.24845	3.63241
	CLM75_RS00835	6.58059	6.30588	6.07654	6.6755	6.69299	7.36006	6.26781	6.66255	6.37515	6.69328	6.19753	5.98875	6.72202	6.84623	6.88759	6.41837	6.5875	6.50888	7.77303	5.86769	CLM75_RS00835	4.86548	5.12564	5.1861	5.4879	4.82598	5.03048	5.71519	4.91691	4.85126	4.78157	4.70794	5.14982	5.42562	5.05971	5.88888	5.54969	5.1701	5.19415	5.46374	5.04541
	CLM75_RS00840	8.53665	7.16275	7.98488	8.11412	8.73408	8.43621	7.18469	8.40766	7.24983	8.196	8.18836	7.96657	7.72836	8.60928	9.04027	7.91599	8.66724	7.32327	8.96124	7.22251	CLM75_RS00840	5.5744	5.99322	5.98246	6.53696	5.37534	5.61224	6.50148	5.72739	5.78778	5.46625	5.61819	5.8488	6.28486	5.7917	7.02092	6.56058	6.16682	5.95788	6.61041	6.21277
	CLM75_RS00845	7.79015	6.31649	7.35056	7.3454	8.03171	7.72875	6.59683	7.81879	6.24685	7.48733	7.32544	7.23416	6.94415	7.78158	8.30001	7.48276	7.65426	6.83221	8.20627	6.72427	CLM75_RS00845	4.92517	5.36058	5.15569	5.91313	4.89769	5.1649	5.94209	5.04124	5.18662	4.71275	4.86612	5.58515	5.53094	5.4221	6.06465	5.9222	5.55771	5.45867	6.02819	5.38491
	CLM75_RS00850	7.91493	6.62584	7.56021	7.63061	8.14354	7.93512	6.73783	8.00719	6.5092	7.86064	7.51379	7.3921	6.95404	8.06193	8.42205	7.73919	7.60884	7.05655	8.42771	6.94984	CLM75_RS00850	5.4561	5.57382	5.41784	6.0851	5.02827	5.33785	6.2414	5.20971	5.44456	5.25538	5.05027	5.3993	5.10588	5.48283	6.2484	5.99676	5.66427	5.81574	6.20599	5.2935
	CLM75_RS00855	5.57202	5.18911	5.28954	5.22588	5.40301	5.15342	5.15851	5.18944	5.14838	5.23088	5.29956	5.23739	5.19988	5.1886	5.51789	5.38755	5.22511	5.06706	5.21093	5.45706	CLM75_RS00855	5.35374	4.43025	4.93203	5.17567	4.96911	5.33785	4.7186	5.12325	5.2704	5.19456	5.17242	4.86143	5.54358	5.31205	4.39709	5.08645	5.29438	4.96903	5.03881	4.90094
	CLM75_RS00860	5.34114	4.82392	4.91675	4.84874	4.98687	4.36758	5.406	4.83696	4.96319	4.93417	5.05676	5.13427	5.03845	4.74806	4.98088	4.87635	5.17024	5.1109	4.20571	5.54358	CLM75_RS00860	6.9802	5.90306	6.68003	5.93755	6.11221	7.08311	5.42235	6.49203	6.59392	6.07716	6.59643	6.58834	6.64301	6.51984	5.5953	5.81368	6.8147	6.13991	5.65055	6.01637
	CLM75_RS00865	4.07037	4.65483	4.35087	3.67711	4.2121	3.23678	5.00053	3.84912	4.9329	3.70436	4.17173	4.67888	4.38608	3.8263	4.45145	4.25135	4.32563	4.32488	3.31522	4.683	CLM75_RS00865	5.17546	4.37337	4.84741	4.45053	4.73784	5.19595	4.17411	4.55809	4.83674	5.00833	4.84938	4.7952	4.8552	4.79418	4.05525	4.26337	4.95728	4.55487	4.16765	4.7816
	CLM75_RS00870	7.58172	7.72964	7.22687	7.62505	7.27033	8.13892	7.69136	7.70812	7.63672	7.19588	6.76134	7.6904	7.9138	7.6873	7.34182	7.63313	7.84151	7.62563	7.99191	7.47834	CLM75_RS00870	5.96275	6.22582	6.36552	6.21992	6.43278	5.95267	6.37903	6.28753	6.29929	6.12174	6.20588	6.01856	5.95186	6.46508	6.57165	6.35876	6.03752	6.27185	6.18854	6.51418
	CLM75_RS00875	10.7826	10.8505	10.43	10.1483	10.5836	10.6354	10.4826	11.0428	10.8145	10.0913	10.5362	10.7137	10.889	10.5321	10.6816	10.4614	11.2961	10.5558	10.649	10.7803	CLM75_RS00875	9.30572	9.1191	9.59781	9.52074	9.49049	9.28905	9.62111	9.78617	9.57914	9.44352	9.49816	9.6244	9.45594	9.55242	9.48828	9.53115	9.33751	9.31865	9.35249	9.79859
	CLM75_RS00880	9.48407	9.46615	8.89409	8.83487	9.51448	9.19092	9.27215	9.32703	9.50798	8.22943	9.17429	9.2517	9.68727	9.04652	9.49689	9.36523	9.69209	9.60296	8.94339	9.50984	CLM75_RS00880	6.63343	7.09825	7.32304	6.70981	7.5321	6.84629	6.93353	7.08049	7.11043	7.06066	7.1203	7.111	7.44959	7.17252	7.11854	6.92951	6.94164	7.32818	6.99823	7.68131
	CLM75_RS00885	7.57357	7.62449	7.27701	7.30501	7.22032	6.97383	7.50529	7.41844	7.66332	6.96644	7.2494	7.72559	7.248	7.26897	7.14739	7.52478	7.91509	7.12372	6.58758	7.81296	CLM75_RS00885	7.44192	7.19763	7.68307	7.26951	7.31231	7.65945	7.15492	7.72291	7.5603	7.13285	7.54441	7.49024	7.69169	7.44503	7.41943	7.28785	7.71063	7.35381	7.30628	7.47185
	CLM75_RS00890	8.27974	8.74749	8.54427	8.00269	8.26002	8.63246	8.55424	8.84853	8.57033	8.10497	8.26939	8.79572	8.62456	8.68708	8.53745	8.69749	8.55063	8.54079	8.62795	8.78654	CLM75_RS00890	8.07915	7.99731	8.62515	8.47218	8.31815	8.51721	8.49906	8.69036	8.61585	8.24156	8.40818	8.42749	8.59839	8.46139	8.726	8.52754	8.66417	8.45877	8.56555	8.33079
	CLM75_RS00895	7.29261	7.59297	7.34616	7.59063	7.22949	7.59776	7.58786	7.78532	7.68916	7.3386	6.76749	7.9454	7.35058	7.57133	7.04424	7.82782	7.4324	7.49634	7.17736	7.8597	CLM75_RS00895	5.60952	5.52967	5.92255	5.90952	5.66735	5.78257	5.79311	5.96534	5.81273	5.80825	5.75302	5.9872	5.53094	5.70938	5.97944	5.83652	5.68675	5.56899	5.90318	5.596
	CLM75_RS00900	5.54916	6.30717	5.80389	5.53103	5.45454	5.95782	6.1248	5.92234	6.04806	5.51123	5.31058	6.22858	6.23854	5.94821	5.52373	6.17068	5.79171	6.11073	5.76855	6.04209	CLM75_RS00900	5.19814	5.09664	5.43346	5.4006	5.19643	5.32303	5.26529	5.43313	5.54979	5.04539	5.3219	5.35242	5.635	5.44008	5.69714	5.40631	5.49964	5.32908	5.54995	5.29705
	CLM75_RS00905	6.01172	6.41043	5.96397	5.92892	5.78096	6.47122	6.33625	6.17899	6.27694	6.09366	5.61259	6.36358	6.34651	6.20918	5.9652	6.28526	6.23101	6.26649	6.46773	5.97801	CLM75_RS00905	5.63634	5.56914	5.9301	5.47167	5.53029	5.84499	5.43805	5.89528	5.78325	5.71389	5.55247	5.79955	5.96602	5.77762	5.60432	5.56059	5.70449	5.64244	5.51129	5.74537
	CLM75_RS00910	2.67481	2.67323	2.86012	2.61804	2.28761	2.53788	2.37248	2.76861	2.62463	2.6471	2.16103	3.0289	2.61594	2.95238	3.09525	2.88374	3.0535	2.26335	2.53421	3.03351	CLM75_RS00910	2.3975	2.01423	2.77956	2.53077	2.40643	3.00024	1.91717	2.47926	2.43673	1.81003	2.66667	2.34907	3.51718	2.57802	2.43597	2.11117	2.67261	1.93039	2.17988	2.33434
	CLM75_RS00915	0.769529	1.04291	1.57997	1.73013	0.959877	1.85509	1.60493	1.36464	1.36881	0.679383	1.1748	1.53007	1.5352	2.01546	1.34492	1.3068	1.49333	1.70784	1.78547	1.80669	CLM75_RS00915	1.61538	1.34617	1.68565	1.16377	1.45766	1.74992	0.583147	1.07902	1.38958	1.49397	1.68716	1.39014	1.06451	1.33052	1.62658	1.28207	0.855507	0.670835	0.751953	-1.74078
	CLM75_RS00920	-0.556574	0.662254	0.451287	0.487674	0.441143	0.704184	0.73963	0.274315	0.517809	0.449644	0.0972183	0.481347	0.0662321	0.712746	0.184887	0.292717	-0.190062	0.807037	0.932829	-0.221978	CLM75_RS00920	0.982411	0.501345	0.464488	-0.600676	-0.155817	0.849699	0.258845	0.502502	0.232422	0.7929	1.03033	0.126596	-4.12869	-0.14876	0.0940717	0.0678951	0.977235	0.605168	0.222087	-0.107005
	CLM75_RS00925	-0.241102	-0.108194	-0.437959	-1.01165	0.181273	-1.40346	0.397181	-0.520192	0.0859757	-0.492405	-0.138223	0.0206032	0.108835	-0.0406465	-1.07009	-0.790475	-0.679175	-0.258586	-0.869756	-0.711777	CLM75_RS00925	-0.268238	0.0635983	-1.00563	-1.58549	-0.327766	0.0627374	-0.160159	0.0172871	-0.0260446	1.05484	0.046845	-0.450338	1.19843	-0.749514	0.907312	-1.03732	-0.05915	-2.51268	-0.327949	-1.02081
	CLM75_RS00935	0.792781	0.843921	0.647007	0.331148	0.499403	0.836427	0.4395	0.807365	0.657441	0.035869	0.0698053	1.15624	0.968603	0.0466005	0.425582	-0.319792	-0.0387337	0.849065	0.204733	0.921467	CLM75_RS00935	-0.425801	-0.535245	-0.578823	-1.12442	-0.523019	0.0627374	-0.107124	-1.06502	-0.175011	-0.420758	-0.326522	-0.541846	-4.12869	-0.659252	-0.592281	-0.124539	-0.641058	-0.627082	-0.432054	-2.30478
	CLM75_RS00940	3.49671	3.54693	3.53993	3.52281	3.6135	3.4316	3.25539	3.31799	3.45882	3.19099	3.13769	3.77019	2.92099	3.34835	3.95815	3.64248	3.19461	3.25429	3.04243	3.70875	CLM75_RS00940	2.40532	2.33428	2.81514	2.58004	2.89134	2.97518	2.92543	2.79065	2.47223	2.62466	2.76279	3.00337	3.35454	2.72771	3.04262	2.9597	2.30514	2.55235	2.88689	1.70137
	CLM75_RS00945	0.721871	1.4964	1.68768	1.49737	1.09826	1.95823	1.96504	1.57214	2.24851	1.81297	0.906942	1.11061	2.46834	1.78115	1.50034	1.68254	0.757766	1.99043	1.65292	1.32832	CLM75_RS00945	0.655227	1.32854	0.864505	0.917697	0.416475	0.886	1.20312	0.927673	0.27899	0.872716	0.880171	1.36517	0.103417	1.06523	1.71802	1.06716	0.768247	1.01223	1.35219	0.593987
	CLM75_RS00950	3.80759	4.38599	4.18483	3.92024	3.67483	3.72765	4.14434	4.243	4.21013	3.7737	3.54352	4.84658	4.13613	4.07483	4.01451	4.35405	3.64941	4.19103	3.39347	4.7213	CLM75_RS00950	4.88937	4.59872	4.60759	4.5404	4.67658	5.45424	4.16605	4.79856	4.87798	4.69639	5.10349	4.62418	5.28967	4.64495	3.84822	4.50943	5.06647	4.71649	4.39129	3.87066
	CLM75_RS00955	2.377	2.18206	1.7315	2.00641	2.34434	2.24333	1.97227	2.25276	2.20364	1.85014	1.537	1.76912	2.40991	1.73811	2.06026	2.67791	2.5555	2.01525	1.69847	2.30157	CLM75_RS00955	1.31685	1.43944	1.99138	1.28758	1.98437	2.15138	0.820647	1.62465	1.84137	1.21653	2.2121	1.90518	2.30436	1.16743	1.31131	0.719436	2.36585	1.32935	0.529804	0.923475
	CLM75_RS00960	3.25863	3.3049	3.37016	2.91055	3.12812	3.10437	3.42295	2.92812	3.10896	2.9433	2.71064	3.32704	3.23167	3.12601	3.03113	3.49901	3.08351	3.3452	3.18125	3.33111	CLM75_RS00960	2.73813	2.62161	2.87417	2.66241	3.08096	2.73761	2.34589	2.64521	2.65988	2.61309	2.63576	2.97063	2.1141	2.53086	2.66003	2.25939	2.56021	2.36006	2.73492	3.24744
	CLM75_RS00965	8.09918	8.5538	8.2976	7.99595	8.0394	8.27761	8.27973	8.48691	8.35788	7.81891	7.74259	8.5066	8.2469	8.31919	8.12655	8.47203	8.36246	8.35381	8.051	8.4151	CLM75_RS00965	6.62843	6.76824	7.14898	6.90219	6.81262	7.00815	6.71395	7.19168	7.15344	6.81385	6.79878	6.71543	7.02742	7.01138	7.31896	6.88342	7.31414	7.06291	7.1777	6.90063
	CLM75_RS00970	7.3296	7.3287	7.25372	7.284	7.34719	7.46614	7.22985	7.45703	7.18298	7.13683	7.1594	7.53309	7.23032	7.23744	7.48598	7.37116	7.45426	7.24853	7.21605	7.56476	CLM75_RS00970	6.39899	6.42816	6.63416	6.43269	6.47918	6.69145	6.25855	6.64217	6.66742	6.33048	6.71068	6.51715	6.52686	6.69689	6.66796	6.49958	6.77608	6.54788	6.52986	6.34063
	CLM75_RS00980	8.05283	8.55929	7.77083	8.1782	7.87222	7.42659	8.80071	8.24522	8.38519	7.99455	7.41326	8.75587	8.43875	8.27282	7.57456	8.13223	8.2717	8.26588	7.29277	8.23559	CLM75_RS00980	9.27544	8.8991	8.84103	9.12812	9.06147	8.84438	9.16993	9.04022	8.98667	9.2138	9.23107	9.04203	8.78826	8.81336	8.66196	9.06239	8.81381	9.0636	8.73625	9.26985
	CLM75_RS00985	7.41473	8.65728	7.79232	8.19736	7.28903	7.51171	8.68153	8.00064	8.68577	7.9777	7.12527	8.32465	8.92908	8.1808	7.18614	7.73542	7.52354	8.52542	7.41654	8.0972	CLM75_RS00985	9.16564	9.18799	8.98683	9.02688	9.29774	8.7117	9.4023	8.92658	8.9061	9.37537	9.19649	9.27377	8.97072	8.74049	8.43401	9.12306	8.70678	9.21727	8.62931	9.60753
	CLM75_RS00990	8.66829	7.95091	8.31511	8.58552	8.75833	8.56256	7.90486	8.42747	8.02789	8.45623	8.39092	7.82717	7.7445	8.21661	8.5038	8.09964	8.54712	7.57566	8.33025	7.98825	CLM75_RS00990	7.61395	7.31374	7.08925	7.32068	7.12835	7.56308	7.37475	7.28341	7.30141	7.40781	7.28717	7.32847	7.18698	7.46492	7.27916	7.16878	7.48122	7.31283	7.2883	7.12334
	CLM75_RS00995	5.09682	5.69263	5.25368	5.06477	5.22129	5.62312	5.7259	4.95017	5.69237	5.15442	5.13902	5.10838	5.61357	5.00836	4.85895	4.80907	4.99362	5.66176	5.14562	5.59826	CLM75_RS00995	5.70843	6.71433	6.19127	5.40145	6.54403	5.45575	5.41444	6.19591	6.14481	6.62004	6.11004	6.05025	5.90365	5.94165	5.58623	5.38645	5.77473	6.25188	5.43196	6.64694
	CLM75_RS01000	9.03941	9.21308	9.02685	9.18857	9.00623	9.28243	9.24024	9.31927	9.21545	9.10149	8.80918	9.41906	9.25956	9.29517	9.17598	9.21524	9.02815	9.19082	9.08772	9.32388	CLM75_RS01000	8.00325	8.48121	8.32422	8.27988	8.39421	8.10535	8.48752	8.13087	8.09394	8.24649	8.1193	8.33647	8.53334	8.15911	8.53609	8.34537	8.13414	8.31322	8.26351	8.48727
	CLM75_RS01005	7.59666	7.37712	7.41243	7.32126	7.65073	7.67298	7.14767	7.46425	7.36578	7.29763	7.36668	7.11645	7.47767	7.30535	7.7107	7.34903	7.52613	7.3584	7.63471	7.14235	CLM75_RS01005	5.56046	5.8469	5.58397	5.49031	5.65681	5.55067	5.86787	5.49035	5.60852	5.63883	5.53687	5.64213	5.4858	5.59941	5.98865	5.65249	5.86425	5.74255	5.66113	5.75833
	CLM75_RS01010	2.98852	5.42964	4.03553	2.26934	2.8711	2.48128	5.74817	3.02711	5.44805	1.86058	3.11104	2.96623	6.30074	2.95614	2.92144	4.59544	2.80402	6.32381	2.47	2.33724	CLM75_RS01010	0.0437414	1.92322	1.0466	0.667172	1.00506	1.0708	1.50514	0.658567	1.05692	1.2468	0.798792	0.783615	0.916884	1.2396	0.907312	1.2484	1.74383	1.12586	1.51035	1.12904
	CLM75_RS01015	4.47073	5.97183	4.74034	4.10425	4.75394	4.40306	5.66979	4.11618	6.26483	4.0495	4.4481	4.5024	6.32748	4.25355	4.55007	5.16885	4.33952	5.95746	4.24653	4.15294	CLM75_RS01015	3.32516	3.60395	3.62965	3.61214	3.42145	3.49922	3.51314	3.29044	3.51428	3.30923	3.38145	2.83169	2.66982	3.32243	3.75414	3.40642	3.06012	3.4918	3.45967	3.29802
	CLM75_RS01020	4.1625	4.79662	4.62312	4.49661	4.26344	4.55614	5.26531	4.04834	5.23657	4.25645	3.9566	4.40652	6.06347	4.35246	4.34997	4.44401	3.91534	5.54409	4.26368	4.34915	CLM75_RS01020	3.25765	3.68756	3.39787	3.70945	3.31825	3.25393	3.34728	3.34431	3.4445	3.20516	3.08229	3.59299	3.75313	3.85381	4.01975	3.29265	3.73102	3.62201	3.63736	3.17196
	CLM75_RS01025	5.06375	5.41655	5.20789	5.08417	4.98559	5.19273	5.33282	4.89191	5.69163	4.94218	4.93954	4.75686	5.83274	4.89929	4.93393	5.06695	4.72093	5.54941	5.03234	4.68716	CLM75_RS01025	3.64544	4.08008	3.97124	4.00384	3.52198	3.63872	3.98555	3.94487	3.96241	3.99314	3.92914	3.70172	3.77473	3.88039	4.0899	3.84601	4.61366	3.96295	4.13917	3.98534
	CLM75_RS01030	6.33147	6.21015	6.41839	5.85076	6.11028	5.92106	6.11422	5.94717	6.01066	6.01199	6.32365	5.96009	6.46706	5.81476	6.09153	5.8709	6.12278	6.16164	5.96131	5.89307	CLM75_RS01030	5.4561	5.30251	5.55495	5.65313	5.09365	5.66998	4.96138	5.62324	5.74384	5.30118	5.54417	5.34286	5.37701	5.65214	5.56484	5.60506	5.65061	5.33921	5.62213	5.02625
	CLM75_RS01035	5.19717	4.77067	4.88477	4.1734	5.17065	3.84221	4.24172	4.41063	4.57207	4.02418	5.08613	4.60264	4.31508	4.05918	4.99589	4.73851	5.08957	4.36164	3.31156	5.27039	CLM75_RS01035	6.07547	4.91	5.39871	5.10274	5.2573	6.03832	4.87999	5.64347	5.68238	5.67546	5.56995	5.65249	5.85884	5.79868	5.26094	5.25558	6.24061	5.16311	5.29872	5.13359
	CLM75_RS01040	5.79279	5.72533	5.68358	5.92012	5.58554	5.4459	5.77321	5.52958	5.85781	5.70261	5.59587	5.9625	5.65639	5.52688	5.83512	5.93699	5.63787	5.75129	4.90213	6.02579	CLM75_RS01040	4.75813	4.475	4.78469	4.67687	4.67088	5.01315	4.44217	4.75166	4.82796	4.78673	4.55938	4.49776	4.40693	4.72464	4.48432	4.40634	5.00099	4.62281	4.66696	4.34969
	CLM75_RS01045	5.16412	4.95811	5.19099	4.68513	4.96636	4.60199	5.01984	5.02772	5.01841	4.87873	4.38693	5.25454	4.63957	4.7887	4.69506	5.37829	5.08463	5.03707	4.85639	5.33092	CLM75_RS01045	4.49601	4.47299	4.37193	4.64105	4.25183	4.73827	4.46424	4.61827	4.66657	4.29424	4.58185	4.54022	4.75006	4.5908	4.6444	4.71445	4.80667	4.38756	4.71345	3.99851
	CLM75_RS01050	5.70206	5.51587	5.81241	5.34178	5.42478	4.81622	5.5998	5.43312	5.51552	5.41087	5.38476	5.92015	5.259	5.37151	5.28725	5.82793	5.69622	5.77328	4.81175	6.13623	CLM75_RS01050	4.47573	4.5643	4.46127	4.41193	4.02634	4.42639	4.42202	4.54014	4.51918	4.48091	4.43248	4.42712	4.4207	4.59768	4.73475	4.23786	4.31584	4.32774	4.43387	4.17126
	CLM75_RS01055	4.74259	4.6272	4.34147	4.18814	4.52594	4.24374	4.48085	4.42025	4.60224	4.15509	4.26079	4.3634	4.55158	4.16533	4.4364	4.58877	4.43959	4.58533	4.02532	4.79755	CLM75_RS01055	4.2271	3.84307	4.3889	4.3006	4.11578	4.42946	4.20064	4.2251	4.25225	4.01529	4.38448	3.75556	4.2615	4.29026	3.88814	4.22349	4.65985	4.29688	4.20138	3.76675
	CLM75_RS01060	3.34375	4.03209	3.85585	3.5535	3.35805	3.66296	4.15073	3.22885	4.35891	3.69564	3.26401	3.50953	4.17925	3.26591	3.29047	3.77295	3.36718	4.55814	3.62636	3.95363	CLM75_RS01060	3.83974	3.69446	3.86369	3.6151	3.76253	3.87152	3.53832	3.84442	3.78824	3.72398	3.65632	3.7841	4.2615	3.77101	3.87826	3.58338	4.35754	3.63852	3.46692	3.50287
	CLM75_RS01065	4.43053	4.55735	4.2005	3.93585	4.66765	4.0315	4.11853	4.2815	4.44466	4.0889	3.85789	4.0343	4.24518	4.10902	4.44872	4.59677	4.20494	4.49004	3.77992	4.25718	CLM75_RS01065	4.27484	4.01132	4.02215	3.22378	4.13523	4.17638	3.72904	3.76248	3.81218	3.97968	3.96378	4.08871	3.87815	3.96442	3.5453	3.3885	4.14883	3.80131	3.48847	4.09566
	CLM75_RS01070	4.6971	4.48166	4.25656	4.55845	4.66606	4.52987	4.54645	4.27303	4.54943	4.29064	4.17816	4.58397	4.63228	4.441	4.57026	4.5161	4.53799	4.68442	4.42988	4.50782	CLM75_RS01070	4.12898	4.27212	4.08596	3.90338	4.37849	4.36662	3.91359	3.88449	3.77611	4.30507	4.20397	4.28123	4.63666	4.29591	3.72136	3.95787	4.05517	3.99749	3.41035	4.19433
	CLM75_RS01075	5.38865	4.74137	5.41352	4.69319	5.48098	4.2807	5.07792	5.04771	4.71843	5.02924	4.64089	5.51752	4.19416	4.64931	5.1714	5.68702	5.14438	4.77077	4.20768	5.54358	CLM75_RS01075	6.33339	6.00748	6.10045	5.77052	5.55629	6.3045	5.22708	6.02142	6.19614	6.41372	6.22548	6.23131	6.5521	6.22623	5.1748	5.56231	6.54868	5.90996	5.65532	5.79527
	CLM75_RS01080	4.247	4.65077	4.7581	3.33535	4.38432	4.21799	4.66266	4.14663	4.45861	3.58976	4.54833	3.9265	4.67367	3.25068	4.33382	4.6932	3.64941	5.17358	3.58451	4.67327	CLM75_RS01080	3.24027	2.92115	3.13372	2.95163	3.14267	3.49922	3.12149	3.42043	3.65555	3.3655	3.1385	3.15677	3.66332	3.03537	2.66003	3.12652	3.5202	3.62754	3.00123	2.47915
	CLM75_RS01085	3.87994	4.08119	3.60025	2.96864	3.796	3.20218	3.80115	3.34247	3.72871	3.19513	3.84379	3.60724	3.82406	3.08881	3.7526	3.87517	3.53583	3.7812	2.88388	3.93745	CLM75_RS01085	3.04887	2.827	2.79492	2.29293	3.03436	3.20089	2.47323	2.96225	2.68603	3.39283	2.8326	2.82255	3.20344	3.1459	2.03493	2.61247	3.08742	2.94187	2.4958	2.42816
	CLM75_RS01090	4.70478	5.39911	4.81521	4.20274	4.49226	4.49312	4.84491	4.72501	5.12943	4.15933	4.80262	5.04763	4.98942	4.28529	4.58894	4.86425	4.79131	4.76895	3.4644	5.41428	CLM75_RS01090	3.78385	4.01821	4.05015	3.57313	3.70791	4.22325	3.49181	4.26086	4.20931	3.88181	3.73134	4.08107	4.63666	3.84227	3.55773	3.73492	4.52992	4.32944	3.93983	3.53335
	CLM75_RS01095	4.29053	5.19957	4.44598	3.78451	3.99136	3.73008	5.41	3.93214	5.54198	3.69126	4.37997	4.0404	5.7851	3.55342	4.32047	4.39744	3.85669	5.45107	3.44449	4.63652	CLM75_RS01095	5.54285	4.36798	5.00317	4.70629	5.18448	5.35898	4.56163	5.10165	5.25228	5.49491	5.43955	5.07671	4.8952	5.18074	4.1811	4.73486	5.08915	4.98095	4.31696	5.06223
	CLM75_RS01100	3.33585	3.97479	3.79177	3.0024	3.53211	3.16313	4.01913	3.00683	4.44378	2.87797	3.28204	3.39047	4.82985	2.84695	3.04563	3.43202	3.03314	4.35436	3.13645	3.53225	CLM75_RS01100	3.61204	3.5612	3.78896	3.332	3.84247	3.65721	3.24391	3.65166	3.59242	3.87698	3.4137	3.61963	2.75923	3.62597	3.401	3.14494	3.45183	3.83034	3.20586	3.43991
	CLM75_RS01105	7.17643	6.91533	6.94769	6.58183	6.91692	7.26162	7.39989	7.12311	7.44239	6.7329	6.69224	6.56628	7.88403	6.59204	6.97634	6.70874	6.93776	7.44958	6.88249	6.32705	CLM75_RS01105	6.2528	6.77761	6.46527	6.39404	6.56262	6.10577	6.49987	6.39382	6.33864	6.31092	6.38965	6.45638	6.65179	6.51197	6.65644	6.4523	6.20678	6.60918	6.2734	6.80706
	CLM75_RS01110	3.36329	4.67995	3.91088	3.23162	3.4347	3.52136	4.89709	3.17533	5.09411	2.97007	3.16709	3.66362	5.02322	3.57803	3.41014	4.50339	3.48428	5.11306	3.54141	3.2807	CLM75_RS01110	2.97723	2.81439	3.17734	3.06412	3.3519	3.50798	3.17064	3.33045	3.14472	3.2205	3.53173	2.84078	3.38296	3.50431	3.38714	3.39364	3.21664	2.79254	2.86509	3.21772
	CLM75_RS01115	1.87626	3.59632	1.25921	1.65663	1.70485	1.63406	2.87082	1.10322	4.11752	1.64189	1.37845	1.4407	3.94949	1.31467	1.92566	3.00894	0.618958	3.14044	1.2559	1.38395	CLM75_RS01115	2.32514	1.75527	1.33973	1.64097	1.16502	2.41007	1.28475	2.03679	1.6241	1.46851	1.68716	2.49435	1.19843	2.0981	1.62658	1.34714	1.74383	1.76985	1.07675	0.995299
	CLM75_RS01120	2.55073	3.74273	2.60141	2.02843	2.55129	2.17359	3.38826	1.98888	4.24476	2.22225	2.55129	2.27233	5.37044	1.7896	2.35614	2.28767	2.3012	4.47893	2.172	2.01485	CLM75_RS01120	0.85116	1.19874	0.864505	0.0508413	1.47521	-0.178329	1.1387	0.730693	0.960209	0.522957	0.712548	0.960765	0.916884	1.03851	1.67302	0.932301	1.22674	1.40848	1.22103	1.46886
	CLM75_RS01125	5.36461	5.51363	5.27111	4.34257	4.71606	4.57925	5.07792	4.76933	5.0464	4.24354	5.40478	4.46889	5.97051	4.38909	4.83412	4.90991	4.6724	5.39129	4.65017	4.12872	CLM75_RS01125	3.40533	3.12123	3.01196	3.48534	3.07521	3.59278	2.99984	3.31176	3.47732	3.43944	3.06499	3.30201	3.20344	3.21316	3.45516	3.31992	3.52686	3.37188	3.31172	2.80313
	CLM75_RS01135	4.95845	5.49903	5.24992	5.02517	4.85083	4.71798	5.3544	5.14372	5.39371	5.3225	4.68559	5.57955	5.13437	5.07818	4.85484	5.26821	4.48026	5.18866	4.5023	5.76469	CLM75_RS01135	5.42374	4.8277	5.06992	5.25176	5.03421	5.95694	4.60797	5.3237	5.37793	5.03459	5.18448	5.13881	5.20469	5.40128	4.95748	5.2584	5.58829	4.92261	5.06375	4.68988
	CLM75_RS01140	6.22171	6.16887	6.34566	5.98723	6.09265	6.13706	6.22346	5.80022	6.38272	6.11072	6.32038	6.2057	5.93543	5.7173	5.92166	5.76424	6.04188	6.3615	5.62923	7.08082	CLM75_RS01140	7.0442	7.16928	6.9084	6.93895	6.85681	7.19856	6.81444	7.09559	7.17514	7.05426	6.97119	7.14899	7.04308	6.92054	6.973	6.8641	7.283	6.92478	7.03449	6.94325
	CLM75_RS01145	5.30521	5.53251	5.96473	5.7165	5.36825	5.69706	5.61546	5.65382	6.04777	5.78922	5.71291	5.67277	5.77935	5.52561	5.102	5.16527	5.2459	5.85891	5.12179	6.61299	CLM75_RS01145	7.10818	6.92472	6.84403	6.93836	6.68268	7.32293	6.89505	6.98786	7.05422	7.01797	6.86857	7.07535	6.7961	6.94053	6.55314	6.83059	7.1453	6.88354	6.76971	6.72955
	CLM75_RS01150	7.27492	7.16578	7.88293	7.21787	7.10544	7.37761	6.85507	7.24258	7.37605	7.31376	7.72746	7.59757	7.31349	7.24515	6.86785	6.56933	6.9489	7.20435	7.00538	8.42093	CLM75_RS01150	8.635	8.57937	8.55426	8.61919	8.6037	8.80249	8.53038	8.72592	8.76625	8.61688	8.53204	8.75865	8.95662	8.58412	8.66878	8.59843	9.05425	8.71266	8.68908	8.66364
	CLM75_RS01155	4.52554	4.7144	5.3552	4.59825	4.50476	4.83328	4.67489	4.6968	4.8165	4.7442	5.16516	4.86902	5.02044	4.59245	4.22817	4.52311	4.30172	4.99089	4.53248	5.57455	CLM75_RS01155	6.34259	6.13875	6.07552	5.97199	6.01955	6.28934	5.86787	6.03715	6.06068	6.50108	6.06507	6.2148	5.97538	6.07089	6.25796	6.04209	6.47308	6.16576	6.07325	6.09817
	CLM75_RS01160	5.13599	5.41953	5.09503	4.79303	4.77621	4.74948	4.9447	5.33281	4.85591	4.78794	4.49135	5.37039	5.01904	5.10129	4.72351	5.54055	4.91421	4.90882	4.97334	5.21587	CLM75_RS01160	4.55344	4.53386	4.60033	4.52161	4.72689	4.66443	4.5074	4.70587	4.65338	4.68538	4.59597	4.74768	4.71697	4.45845	4.43127	4.53293	4.7163	4.49116	4.52474	4.4264
	CLM75_RS01165	3.89076	3.94691	3.96999	3.72284	4.20993	3.35491	3.48488	3.89675	3.93368	3.55321	3.68122	4.32145	3.72141	3.70861	3.91932	4.1353	3.8353	3.86381	3.42768	4.15494	CLM75_RS01165	3.27483	2.46506	2.91222	2.52449	2.81758	3.58176	2.61413	2.94719	2.7982	3.30204	3.05334	3.17125	2.88375	3.46471	2.70543	2.62126	3.17484	2.5754	2.69429	2.62213
	CLM75_RS01170	2.38468	2.32649	2.67805	2.55876	2.15797	2.18072	2.5079	2.32007	2.31521	2.21413	2.14141	2.37239	2.18946	2.3601	2.36773	2.38328	1.84435	2.49718	2.07171	2.54065	CLM75_RS01170	2.11233	1.38079	1.81179	1.94355	1.50969	2.32669	1.43536	1.64719	2.54072	1.92682	1.77489	2.25704	2.04466	1.5163	1.80401	1.66894	1.4948	2.19875	1.80564	1.51846
	CLM75_RS01175	2.28161	2.91582	2.51213	2.33559	2.35227	1.9665	2.97159	1.98888	2.58701	2.65613	2.53133	2.81083	2.30389	2.25411	2.468	2.71268	2.12004	2.85437	1.89713	2.75098	CLM75_RS01175	2.84549	2.63959	2.61627	2.31492	2.87159	3.02079	2.29754	3.06905	2.73696	3.11778	2.55546	3.05112	2.5745	2.52124	3.12846	2.49774	2.74295	2.76774	2.33065	2.66681
	CLM75_RS01180	3.67622	3.58785	3.10739	2.97998	3.15102	2.75875	3.13502	3.17533	3.42546	2.76854	2.97728	3.527	3.34739	3.05414	3.22511	3.01691	3.47927	3.51581	2.94185	3.62752	CLM75_RS01180	2.50329	2.73299	2.74835	2.61592	2.84484	3.00024	2.49054	2.7461	2.82591	3.02475	2.54718	2.80408	1.81372	3.02179	2.10436	2.74311	3.23303	2.71164	2.89766	2.46657
	CLM75_RS01185	2.42987	2.86416	2.43473	2.45961	2.29585	2.10031	2.41021	2.62296	2.98187	1.94643	2.46974	3.05925	2.59362	2.0858	2.24119	2.70777	2.14555	2.72867	2.0543	2.68607	CLM75_RS01185	2.00321	1.88152	1.78128	1.79497	2.02068	1.79834	1.57171	1.55484	1.57829	1.1217	1.9102	0.624352	2.41855	1.45699	1.76165	1.22551	1.95613	1.70863	1.7748	1.46886
	CLM75_RS01190	4.93774	5.36172	4.98772	4.86004	4.74945	5.23442	5.23709	5.0711	5.50967	4.71356	4.61385	4.7898	5.09782	4.88851	4.87629	5.26236	4.91329	5.49585	4.83615	5.04519	CLM75_RS01190	4.85695	4.46898	4.74308	4.65261	4.67847	5.18598	4.65093	4.80776	4.75262	4.80464	4.9039	4.66312	4.9998	4.66474	4.1811	4.69584	5.06418	4.71649	4.54773	4.48994
	CLM75_RS01195	1.96081	2.04648	1.93258	1.77423	1.18956	2.152	1.56725	2.01957	2.03229	1.51541	1.12239	1.8267	2.28544	2.05808	1.37966	2.22711	1.42205	2.26852	2.03668	2.18894	CLM75_RS01195	2.36579	1.60232	1.70746	1.31694	1.60843	2.36577	1.60388	2.26766	1.76163	2.69222	1.94844	2.11447	0.916884	1.93381	1.31131	2.1663	1.35206	1.51958	1.25496	1.92014
	CLM75_RS01200	5.31428	6.01076	5.57353	6.1913	5.38477	5.88333	6.07868	5.8881	6.24332	5.90946	4.94521	5.79411	6.39734	5.87311	5.19679	5.80106	5.26712	6.24697	5.72382	5.72216	CLM75_RS01200	5.06007	5.53353	5.40038	5.28092	5.40769	5.26735	5.46785	5.2823	5.31158	5.38011	5.24334	5.66406	5.58084	5.05971	5.15038	5.22921	5.32528	5.46022	5.31489	5.40153
	CLM75_RS01205	5.23586	5.57062	5.40452	5.6411	5.34957	5.52713	5.70762	5.68607	5.76154	5.48489	4.71132	5.54565	5.91607	5.59841	5.05262	5.46608	5.16557	5.75359	5.53114	5.40591	CLM75_RS01205	4.80765	5.11539	4.83261	5.06538	4.87968	4.82847	5.09328	4.91226	4.91899	4.91715	4.91521	5.16617	4.92449	4.67779	5.07888	4.99721	5.01764	4.94822	5.02413	5.13558
	CLM75_RS01210	7.24204	7.46601	7.42749	7.60214	7.15782	7.54644	7.58256	7.70831	7.47954	7.59728	6.72666	7.53687	7.56417	7.6531	7.26589	7.43949	7.43353	7.60675	7.40091	7.41068	CLM75_RS01210	6.9687	6.95303	7.23875	7.36198	6.98141	7.25754	7.18181	7.26395	7.19653	7.20111	7.059	7.02642	7.327	7.14342	7.06838	7.35332	7.01514	7.08742	7.23707	7.10316
	CLM75_RS01215	6.27274	6.57023	6.54144	6.68303	6.37773	6.5383	6.6997	6.40748	6.63011	6.77905	6.18161	6.42953	6.65936	6.27578	6.33706	6.61928	6.18369	6.60118	6.41285	6.51982	CLM75_RS01215	6.03257	6.22195	6.00684	6.04673	6.00528	6.33928	6.08068	6.06566	6.0274	6.17879	6.16317	6.08985	6.28109	5.95867	5.80273	5.95475	6.3423	6.12437	6.16829	5.85562
	CLM75_RS01220	5.07565	5.90182	5.46957	4.96365	5.21261	5.12506	6.00354	5.1838	5.81879	5.37671	5.02321	5.38364	6.04302	5.25955	5.12437	5.85653	5.24073	5.98207	5.38034	5.29419	CLM75_RS01220	4.86264	4.90183	4.62631	4.83871	4.45567	5.02439	4.88491	4.92385	4.85799	5.08573	4.94704	4.90973	4.95319	4.70353	4.90494	4.91822	5.16157	4.76491	4.94582	4.31853
	CLM75_RS01225	7.86009	7.97099	8.03181	7.39143	7.86532	7.54195	7.94604	7.59696	8.07875	7.37571	7.78206	7.59446	8.23898	7.45688	7.91696	7.54732	7.70353	8.02829	7.62663	7.39617	CLM75_RS01225	6.82488	7.51926	7.31574	7.41046	7.0338	7.12524	7.20165	7.50911	7.38445	7.15596	7.1931	7.54269	7.67311	7.04994	7.73341	7.35018	7.65319	7.39851	7.51825	7.12184
	CLM75_RS01230	3.66367	4.20125	4.08422	3.707	3.44956	3.9895	4.21609	3.87173	4.07059	3.40233	3.47464	3.98773	4.33988	3.6118	3.81317	4.17859	3.69332	4.29985	3.99141	4.0011	CLM75_RS01230	3.11235	3.33493	3.40122	3.76643	3.24341	3.59004	3.2025	3.72766	3.57386	3.35858	3.62911	3.23467	2.66982	3.09494	3.69909	3.42663	4.10499	3.52473	3.86675	2.58769
	CLM75_RS01235	8.32978	8.23144	8.70982	8.13425	8.08291	8.2274	8.26776	8.50159	8.1748	8.47313	8.41929	8.52845	8.26614	8.24071	7.98858	8.41633	8.30666	8.1096	8.35023	8.58959	CLM75_RS01235	7.70626	7.71171	7.93126	8.3439	7.69965	7.85454	8.23529	8.11614	8.10529	8.11112	7.94824	8.02908	7.87037	7.7661	7.9773	8.24784	8.04501	7.88146	8.20144	7.77356
	CLM75_RS01240	4.79534	4.98254	4.95112	3.85191	4.32515	3.87773	4.86446	3.74582	4.58246	3.67508	5.00884	4.05553	5.62371	3.78249	4.43227	4.2897	4.1012	5.02871	3.98683	3.91874	CLM75_RS01240	2.26625	2.54355	2.50239	2.87967	2.74709	2.67156	2.55777	2.45817	2.89481	2.93465	2.49646	2.43558	2.1141	2.52124	3.24064	2.8703	2.975	2.40577	2.79764	2.59927
	CLM75_RS01245	4.41937	4.41261	4.5228	3.98922	4.56056	3.67563	4.32873	3.94552	4.46121	4.06765	4.36031	4.10582	4.97222	3.87677	4.37027	4.32545	3.66714	4.65115	4.13913	4.24032	CLM75_RS01245	3.6255	3.35684	3.4698	3.67301	3.588	3.47856	3.43929	3.70635	3.50206	3.63523	3.57311	3.37263	2.62294	3.47969	3.45516	3.86465	3.95005	3.37517	3.49322	3.34688
	CLM75_RS01250	4.26374	4.71148	4.17428	3.71833	4.25501	3.81498	4.37034	3.73969	4.72132	4.00665	4.04019	4.0003	5.443	3.91785	4.05627	4.2864	4.06322	5.05064	3.95669	3.87572	CLM75_RS01250	4.08584	3.74017	3.82182	3.98338	3.80132	4.17088	3.57934	3.91422	4.04051	3.61796	4.02171	4.09252	3.97464	3.91018	3.87826	3.68125	3.91493	3.55113	3.63307	3.42048
	CLM75_RS01255	3.1946	4.66191	3.39307	2.41016	3.10954	2.90363	4.57283	2.51937	5.19132	2.85204	3.07703	2.77472	5.62371	2.70666	3.20588	3.78934	2.95233	4.93994	2.63136	1.67906	CLM75_RS01255	2.02367	2.06833	1.46021	1.81569	2.09067	1.5495	1.36202	1.64719	1.56895	1.66064	1.94844	1.20551	1.97171	1.66347	1.76165	1.77522	1.32174	1.94816	1.87273	1.86369
	CLM75_RS01260	7.73925	7.85987	7.91377	7.94321	7.8056	8.81509	8.20886	7.98387	7.90501	8.40654	7.27494	8.18337	8.12523	8.03973	8.43234	8.13544	7.75959	8.23179	8.34341	8.28928	CLM75_RS01260	7.86549	7.98303	8.00147	8.25355	7.7651	8.04179	8.02495	8.11504	8.1855	7.9127	8.04736	7.92719	7.89771	7.96346	8.16875	8.21381	8.08534	7.91262	8.2313	7.81818
	CLM75_RS01265	5.47384	4.73372	5.135	5.23064	5.59976	5.92265	4.87317	5.48994	4.68246	5.11407	5.32732	4.75315	5.40824	5.20608	5.66774	5.37287	5.33591	5.01801	5.52246	4.61633	CLM75_RS01265	3.74123	4.46898	4.35994	4.41193	4.21835	3.78526	4.43101	4.18459	4.18964	4.27967	4.32032	3.87978	4.06509	4.32107	4.31892	4.32926	4.01309	4.21853	4.34873	4.15958
	CLM75_RS01270	7.61859	7.09359	7.65379	7.81304	7.67523	8.3985	7.3962	7.85594	7.37329	8.04693	7.45044	7.07473	7.81735	7.83106	7.91609	7.24406	7.61969	7.39905	8.15511	6.87749	CLM75_RS01270	6.28918	7.38021	6.71375	6.97652	6.51197	6.12583	6.94063	6.67316	6.77896	6.49794	6.53021	6.34264	6.73955	6.67537	7.43804	6.82084	6.45573	6.80346	7.07085	6.87527
	CLM75_RS01275	8.67876	9.29267	9.26689	9.12443	8.66477	9.34255	9.23462	9.18298	9.07433	9.17757	8.82771	9.15606	9.3127	8.95181	8.82389	9.20758	8.66434	9.18314	9.09499	9.1834	CLM75_RS01275	8.00244	8.57931	8.34077	8.67216	8.30118	7.99165	8.69737	8.44901	8.42425	8.31907	8.35906	8.18125	8.07903	8.20076	8.78567	8.63865	8.28715	8.29468	8.70457	8.47555
	CLM75_RS01280	6.76934	7.09415	6.99452	6.60887	6.80118	6.82428	6.87617	7.05219	6.86679	6.71862	6.76722	7.13473	7.06976	6.93799	6.94261	7.06436	6.78787	7.0887	6.89569	7.06575	CLM75_RS01280	6.41118	6.54175	6.47881	6.38843	6.47809	6.62991	6.67663	6.51901	6.56925	6.47893	6.45308	6.67091	6.42124	6.64303	6.79151	6.52879	6.53882	6.54824	6.49598	6.61023
	CLM75_RS01285	4.67537	5.58558	5.37835	4.75171	4.86475	5.09142	5.28937	4.98039	5.6263	4.58168	4.77318	5.10257	5.52492	4.89538	4.88539	5.0221	4.64023	5.17908	5.00881	5.41094	CLM75_RS01285	6.04639	5.84341	6.00794	5.86238	6.11641	6.11774	6.14221	6.09568	6.11664	6.04737	6.03872	6.17494	6.42124	6.03247	6.04712	6.14783	6.26273	6.1185	6.02246	6.16976
	CLM75_RS01290	3.68557	4.35264	3.97607	3.89649	3.56659	3.94415	4.50097	3.46276	4.69651	3.81052	3.7965	4.40652	4.82347	3.88666	3.73706	4.16968	3.32872	4.52719	3.86478	4.45847	CLM75_RS01290	4.5268	4.5184	4.7151	4.74731	4.53731	4.6247	4.62374	4.68151	4.73707	4.65466	4.46142	4.97308	4.57643	4.77205	4.57272	4.32523	4.46203	4.78852	4.50019	4.55377
	CLM75_RS01295	4.999	5.1947	5.10061	5.02882	4.88401	5.06181	5.3293	5.04398	5.40186	4.87036	4.84164	5.51861	5.23155	5.10468	4.93198	4.89377	5.27726	5.03176	4.82079	5.47639	CLM75_RS01295	5.3936	5.40225	5.53603	5.30585	5.4681	5.39486	5.40191	5.71678	5.571	5.09823	5.46175	5.523	5.14787	5.48531	5.55557	5.3761	5.45143	5.13237	5.25539	5.61607
	CLM75_RS01300	6.65106	6.70261	6.57539	6.24596	6.65545	6.49643	6.68988	6.6532	6.46322	6.33161	6.22458	6.90342	6.39788	6.45888	6.47733	6.87997	6.52266	6.7802	6.6297	6.88384	CLM75_RS01300	5.47201	5.32879	5.3017	5.70402	5.29361	5.5286	5.61123	5.50328	5.56396	5.51837	5.52637	5.46688	5.62908	5.33831	5.46279	5.65837	5.58988	5.65399	5.76091	5.47403
	CLM75_RS01305	8.72907	8.85003	8.65565	8.12619	8.83333	8.83004	8.73792	8.65925	8.66505	8.3173	8.40599	8.48999	8.71168	8.63781	8.80171	8.87588	8.69949	8.96692	8.9102	8.43664	CLM75_RS01305	6.73039	6.88023	6.95699	7.10962	6.71858	6.76395	7.08862	6.94587	6.95688	6.76566	6.83622	6.84413	7.15027	6.90722	7.47455	7.08145	7.07204	6.96978	7.23989	6.72955
	CLM75_RS01310	7.36542	7.42218	7.4286	7.78839	7.26509	8.00667	7.50824	7.84367	7.55007	7.72566	6.89597	7.53417	7.72323	7.72952	7.37143	7.60746	7.38533	7.42243	7.87388	7.41257	CLM75_RS01310	6.01798	6.52637	6.37959	6.40219	6.18267	6.0277	6.36854	6.27703	6.20333	6.15405	6.20785	6.36249	6.32934	6.28425	6.55159	6.38965	6.03167	6.31271	6.35907	6.42271
	CLM75_RS01315	8.49815	8.37255	8.67273	8.93272	8.59822	9.52307	8.71576	8.98245	8.68118	9.04033	8.24393	8.42928	9.06045	8.96546	9.00321	8.65964	8.39598	8.79302	9.49078	7.88357	CLM75_RS01315	6.55168	7.5013	7.16901	7.58842	7.06637	6.36	7.3927	7.09473	7.19691	7.00972	6.96654	6.79648	6.78816	7.01609	7.92968	7.42036	6.8181	7.24169	7.75927	7.35599
	CLM75_RS01320	6.69492	6.44776	6.40999	6.07843	6.54526	5.98912	6.76694	6.5191	6.41685	5.96254	6.10477	6.90551	6.56211	6.38059	6.48034	6.79704	6.49192	6.79864	5.93598	6.96816	CLM75_RS01320	4.83106	4.94729	5.03046	5.01365	4.95979	5.37424	5.20889	5.03199	5.13613	4.5124	4.92962	4.87918	5.31938	5.13101	5.19483	5.06727	5.42493	4.84887	5.25887	4.71934
	CLM75_RS01325	5.09682	5.5967	5.19752	5.05497	5.0121	5.19273	5.25498	5.46042	5.40096	4.68151	4.85876	5.44008	5.26137	5.49168	5.50024	5.45951	5.11723	5.1639	5.11865	5.30863	CLM75_RS01325	3.86831	3.83685	4.41066	4.45549	4.26703	4.75799	4.08005	4.34024	4.24787	3.64663	3.94183	4.12636	4.16663	4.26742	4.205	4.38584	4.53323	4.18895	4.56022	2.9993
	CLM75_RS01330	6.41111	6.67364	6.54758	6.33293	6.39798	6.5071	6.54931	6.586	6.63549	6.44829	6.47467	6.46792	6.60785	6.41754	6.35536	6.68548	6.42252	6.62633	6.31206	6.71921	CLM75_RS01330	6.23426	6.12477	6.22662	6.55324	6.16993	6.39111	6.26548	6.39382	6.48268	6.45644	6.44028	6.40446	6.34747	6.26421	6.31947	6.40438	6.57864	6.20647	6.33085	6.28081
	CLM75_RS01335	4.57667	5.13055	4.89444	4.3773	4.5843	4.36132	4.6914	4.6968	4.77458	4.32781	4.82123	4.76424	4.7664	4.53578	4.6388	4.71787	4.81038	4.92855	4.27688	4.93659	CLM75_RS01335	4.30232	4.27097	4.27488	4.30244	4.51415	4.6826	4.4175	4.46917	4.433	4.52789	4.56964	4.58146	4.76093	4.38611	4.47124	4.44649	4.68389	4.60333	4.69194	4.52373
	CLM75_RS01340	4.40246	6.01748	5.26987	4.8884	4.60767	5.26325	6.05293	4.91386	5.91269	4.93046	4.86674	4.99366	6.06008	4.50787	4.74699	4.8431	4.6691	5.84297	4.43829	6.01151	CLM75_RS01340	6.21659	6.55933	6.49339	6.21992	6.54195	6.38201	6.29594	6.53143	6.49876	6.71378	6.58181	6.33382	6.45174	6.54971	6.32494	6.44829	6.50885	6.67166	6.21032	6.43487
	CLM75_RS01345	6.82291	6.42685	6.03343	5.8456	6.97742	5.47735	6.51602	5.49905	6.11236	5.82565	5.27726	5.47426	5.58273	5.73108	6.76044	6.62939	7.07768	6.21284	5.19512	5.06766	CLM75_RS01345	6.63883	5.76981	6.15255	6.22671	6.03591	6.64256	5.7992	6.48553	6.39522	5.82214	6.40634	5.9159	6.07015	6.46068	6.08841	6.02686	6.62749	6.1481	6.05291	5.95803
	CLM75_RS01350	7.94053	6.15066	6.88441	6.90033	8.18823	6.51417	6.10603	6.19701	5.99219	6.17489	6.4691	5.05518	5.06439	6.29706	8.65283	6.896	7.82828	5.51011	6.06548	5.1839	CLM75_RS01350	4.69094	4.76274	4.66025	4.67262	5.10074	5.21748	4.48598	4.85451	4.86468	4.60587	4.7892	4.36864	4.73912	4.90188	5.11717	4.91286	4.92486	5.18669	4.98761	5.009
	CLM75_RS01355	5.11308	5.18209	5.10339	5.36936	4.91243	5.34165	5.37158	4.76481	5.26811	5.37535	4.92719	5.20383	5.36276	5.18299	5.04181	5.10764	4.6647	5.41945	5.37859	5.26855	CLM75_RS01355	4.74278	4.74458	4.78084	4.57878	4.68036	4.92975	4.57792	4.67878	4.59245	4.89582	4.7135	4.88139	4.63666	4.72673	4.92427	4.84032	4.51994	4.60333	4.56698	4.48683
	CLM75_RS01360	9.20686	9.11312	9.4688	9.11262	8.99733	9.26713	8.73221	9.14252	9.01193	9.13905	10.5318	8.98682	8.82622	8.7119	8.92365	8.51997	9.31296	8.70892	8.64541	10.2737	CLM75_RS01360	10.7934	10.722	11.0817	11.0333	11.0617	11.1474	11.2497	11.2389	11.1183	10.9187	10.94	10.9358	10.9786	11.2479	11.0569	11.1732	11.3442	11.2194	11.2114	10.9946
	CLM75_RS01365	5.6369	6.05943	5.92833	5.3943	5.44623	6.16877	6.17849	5.76895	6.13535	5.44554	5.72175	5.58164	6.15906	5.55753	5.6055	5.81084	5.74136	6.08677	5.79435	6.33413	CLM75_RS01365	6.41457	6.71136	6.75228	6.58677	6.82165	6.52303	6.59846	6.79255	6.79307	6.72927	6.68732	6.86655	7.17078	6.62462	6.82788	6.76042	6.74285	6.96133	6.72805	7.06507
	CLM75_RS01370	7.00036	6.80252	6.69039	6.69627	6.71544	7.02373	6.85116	6.83892	6.86385	6.5151	6.36723	6.77767	6.61433	6.91957	6.63903	6.96407	7.30783	6.5667	6.65628	6.55054	CLM75_RS01370	6.08098	6.52806	6.49887	6.28312	6.35314	6.01802	6.53887	6.36124	6.21273	6.57452	6.26389	6.54591	6.66052	6.15182	6.82145	6.35876	6.20886	6.38419	6.19037	6.62517
	CLM75_RS01375	6.24614	6.22831	6.33327	6.06162	6.0718	6.11583	6.33555	6.12649	6.39002	6.26192	5.87561	6.12696	6.14569	5.99694	5.9566	6.37445	5.98516	6.30914	5.97756	6.22744	CLM75_RS01375	6.35374	6.53456	6.2767	6.35697	6.3561	6.31161	6.55387	6.20733	6.27113	6.74062	6.26578	6.43703	6.66631	6.31936	6.19966	6.48308	6.20471	6.37232	6.29632	6.26365
	CLM75_RS01380	5.06136	4.66191	4.86031	4.60925	4.83253	4.70445	4.8596	4.67768	4.60694	4.82641	4.52328	4.9651	4.75471	4.5117	4.76352	4.93116	5.03601	4.65412	4.74004	4.7507	CLM75_RS01380	4.7474	4.53675	4.37364	4.90305	4.60065	5.22192	4.82647	4.74819	4.84837	4.68814	4.73918	4.66312	4.80359	4.71834	4.83006	4.83277	4.83914	4.49268	4.71751	4.3701
	CLM75_RS01385	5.91901	5.75637	6.00768	5.90433	5.91943	5.95731	5.89034	5.92505	5.83559	6.02307	5.68439	5.8455	5.94869	5.71896	5.92313	6.04083	5.7775	6.00083	5.80024	5.84556	CLM75_RS01385	4.96275	5.36112	4.94241	5.0697	4.8928	5.00595	5.14611	5.05536	4.84644	5.21958	4.94073	5.03575	5.45268	4.71412	5.10875	4.99889	4.81213	4.87349	4.90456	4.55971
	CLM75_RS01390	5.76587	5.9698	5.7121	5.91668	5.92276	6.27415	5.78966	5.81269	6.02743	5.82632	5.4809	5.75756	5.96472	5.89874	5.83877	5.98198	5.91782	6.05046	6.18431	5.5205	CLM75_RS01390	4.87396	4.90926	4.71644	4.84502	4.78434	4.97152	4.92683	4.87455	5.059	4.78673	4.85442	4.73799	4.4745	4.85671	5.08748	4.85717	5.10482	4.90339	4.93015	4.61205
	CLM75_RS01395	6.10058	6.17242	6.46617	6.20868	6.22155	6.40923	6.28713	6.34976	6.27299	6.44439	6.13608	6.44397	6.46706	6.17772	6.38238	6.34704	5.95842	6.43808	6.33162	6.57203	CLM75_RS01395	6.97265	6.62239	6.65114	6.78888	6.77326	6.86885	6.64364	6.70238	6.7898	6.75583	6.80183	6.6289	6.60733	6.75908	6.40451	6.62404	6.73496	6.65046	6.67344	6.61238
	CLM75_RS01400	6.33098	6.09572	6.256	6.25959	6.30047	6.03654	6.04053	6.42526	6.28454	6.3787	6.3054	6.31474	6.55346	6.16478	6.16308	6.16934	6.30681	6.12469	5.99364	6.46726	CLM75_RS01400	7.35223	6.77314	7.26541	7.4047	6.78913	7.43207	7.12544	7.33059	7.37761	7.13335	7.36962	7.30363	7.20101	7.40473	7.05529	7.34836	7.41004	7.00998	7.22321	7.03237
	CLM75_RS01405	7.44784	7.09228	7.43386	7.3259	7.33824	7.16968	7.16315	7.63855	7.34949	7.53894	7.28578	7.41075	7.48729	7.25949	7.3099	7.25062	7.66518	7.10956	7.09832	7.57582	CLM75_RS01405	8.25861	7.67938	8.22614	8.54688	7.82835	8.51377	8.27953	8.46601	8.40903	8.32263	8.34658	8.17857	8.41881	8.34115	8.0329	8.43361	8.43237	8.00807	8.41059	7.96962
	CLM75_RS01410	7.69443	7.61671	7.75566	8.14437	7.54881	7.97832	7.91521	7.89699	7.9418	8.19451	7.57433	7.86674	8.02608	7.7421	7.66257	7.60481	7.64478	7.62652	7.62829	8.13455	CLM75_RS01410	8.19505	7.97765	8.32036	8.27065	7.8871	8.5633	8.01003	8.40153	8.34874	8.03374	8.32283	8.03181	8.27557	8.3483	7.9974	8.16887	8.35517	8.05314	8.04553	8.01136
	CLM75_RS01415	7.53681	7.80818	7.74746	7.7108	7.60046	7.49251	7.59709	7.75143	7.74778	7.94656	7.62539	7.80182	7.6633	7.44689	7.45628	7.6742	7.51286	7.8723	7.38685	7.93045	CLM75_RS01415	7.29471	7.14431	7.16064	7.27302	7.08399	7.66452	7.17847	7.59035	7.57539	7.36403	7.33034	7.23205	7.23063	7.47492	7.11959	7.2682	7.72374	7.25066	7.33861	7.07806
	CLM75_RS01420	6.96976	7.21197	6.97605	6.03287	6.9532	6.9443	7.3708	7.04568	7.14573	6.62543	6.20975	7.16295	7.29141	6.82248	6.85915	7.21879	7.19725	7.30734	6.94229	7.42319	CLM75_RS01420	6.62467	6.51278	6.87055	6.92977	6.43221	6.81486	6.73498	6.97307	6.91718	6.70903	6.84301	6.59104	6.7855	6.68939	6.83684	6.89661	7.05659	6.674	6.84054	6.4389
	CLM75_RS01425	3.17704	2.9657	2.63256	3.21892	3.15102	2.71523	2.76663	2.74431	2.7716	3.50076	2.7239	3.599	2.93881	2.70666	2.81121	2.64742	3.04674	2.72492	2.72237	2.77199	CLM75_RS01425	1.86261	1.68082	1.78128	2.1856	2.16825	2.4889	2.05152	3.21449	3.0166	2.89697	2.97524	1.1481	2.75923	2.0851	2.43597	2.4541	2.03302	1.54315	2.52853	2.06069
	CLM75_RS01430	4.50984	4.9962	4.52902	5.11879	4.51362	5.13794	4.8211	4.9125	4.73213	5.31397	4.35464	4.86215	4.61391	5.02546	4.50094	5.07651	4.63349	4.83667	5.30871	4.75598	CLM75_RS01430	4.60358	4.07745	4.32157	4.22518	4.39241	4.63407	4.0599	4.34484	4.30665	4.5493	4.6569	4.32721	4.63666	4.41496	4.56042	4.32658	4.56271	4.32435	4.28037	4.30446
	CLM75_RS01435	10.6019	10.0707	10.5531	10.4196	10.7982	11.221	10.0939	11.2042	9.57859	10.437	9.57713	10.1533	10.0544	10.94	10.8824	10.8375	10.904	10.1592	11.1019	9.39547	CLM75_RS01435	6.3872	7.53075	7.41101	7.61599	7.2796	6.36322	7.52248	7.30941	7.39885	7.20304	7.32581	6.99928	7.15439	7.51243	7.98768	7.57011	6.82554	7.62455	7.84796	7.56552
	CLM75_RS01440	1.10291	1.6669	1.39255	0.999605	1.02082	1.15865	0.914837	1.58588	1.6377	1.0877	0.875622	1.06349	0.82267	1.16672	1.79448	1.46669	1.02847	0.9555	0.750223	0.940146	CLM75_RS01440	0.939974	0.12615	0.678317	-0.444715	0.650756	1.00631	-0.00656791	0.7723	0.389229	-0.082933	0.380951	-0.450338	0.566741	0.274109	0.557251	0.0154823	0.0185306	0.512687	1.13863	0.593987
	CLM75_RS01445	3.02334	3.52713	3.44224	2.61319	3.07163	2.73957	3.30201	3.01701	3.11117	2.89839	3.07358	3.49628	3.35183	2.90258	3.28437	3.40797	3.34532	3.5288	3.2517	3.29165	CLM75_RS01445	3.02369	3.27178	3.43755	2.57397	3.19126	3.27119	2.37414	3.21951	3.47232	3.2281	3.12743	3.11992	2.80194	3.39269	2.48886	2.54935	3.31997	3.46737	2.63541	3.23265
	CLM75_RS01450	5.54916	6.01748	6.51347	6.23928	5.49179	7.74281	6.06776	5.75001	5.72557	6.37004	5.29439	5.88161	5.80467	5.6989	5.46965	6.34308	5.46437	5.90861	6.84943	5.6559	CLM75_RS01450	4.38571	5.47815	5.6649	5.35533	5.53971	4.99664	5.01619	5.83193	5.89445	5.45333	5.65044	4.27789	4.64841	5.54111	5.58319	5.33124	4.95728	5.24983	5.50954	5.29171
	CLM75_RS01455	8.01934	7.41247	8.6553	8.7594	7.99041	10.0341	7.68285	8.57393	7.2984	8.61935	7.8721	7.96035	6.92714	7.94663	7.81566	8.41821	7.6054	7.25505	9.29577	7.72919	CLM75_RS01455	7.64875	7.1859	7.28978	7.0573	7.65895	7.52348	6.74628	7.54443	7.72124	7.57782	7.84413	7.23162	7.27867	7.5472	6.90287	6.84287	7.44958	7.35464	7.10671	7.1057
	CLM75_RS01460	7.83056	8.16547	8.7744	9.1932	7.57148	10.1487	8.66998	9.19045	7.76174	9.02768	7.70188	8.76118	7.35667	8.65468	7.50725	8.8908	7.44128	8.60608	9.51967	7.55362	CLM75_RS01460	5.9877	6.47572	6.2671	6.36578	6.76124	5.98597	6.03349	6.67682	6.80131	6.75583	6.75944	5.76655	5.7154	6.37849	6.41991	6.1772	5.82018	6.27053	6.53648	6.13639
	CLM75_RS01465	5.36558	6.48358	6.28875	6.93523	5.18181	7.62871	7.03295	7.09726	6.3093	6.78541	5.37779	6.97877	5.64286	6.63344	5.18128	6.89491	4.75241	7.06883	7.07773	5.37019	CLM75_RS01465	1.83971	4.08534	3.63819	3.9765	4.39241	2.35286	3.39861	4.66228	4.75468	4.4024	4.41439	1.87011	1.53863	3.47471	3.49448	3.43663	2.61125	3.75664	4.45591	3.73563
	CLM75_RS01470	5.9949	7.01463	6.69778	7.36608	5.8623	8.01704	7.47429	7.52167	7.10915	7.24255	5.99928	7.49002	6.54621	7.10291	5.86761	7.35396	5.69999	7.56296	7.6053	6.19038	CLM75_RS01470	4.11951	4.97658	5.00867	4.8488	5.47248	4.5976	4.23699	5.48827	5.43238	5.53686	5.40559	4.40891	4.48764	5.00037	4.78319	4.77482	4.23271	4.94047	5.00183	4.89156
	CLM75_RS01475	5.17522	5.98116	5.6373	6.77272	4.87166	7.33133	6.60585	6.76688	6.4578	6.59585	4.85976	6.55886	6.09295	6.36405	4.94363	6.49636	4.69956	6.7661	6.8275	5.21587	CLM75_RS01475	3.50695	4.53675	4.35822	4.08714	4.4289	3.63339	3.34253	4.58753	4.78424	4.66311	4.57372	3.35371	3.13826	4.34581	4.03761	3.89035	3.66008	4.09639	4.27487	3.96759
	CLM75_RS01480	5.86792	7.35421	6.48069	7.56308	5.65847	7.67061	7.50264	7.47167	7.47408	7.42349	5.75816	7.59963	7.51354	7.1783	5.9652	7.3023	5.56293	7.61438	7.01216	6.88082	CLM75_RS01480	6.51737	6.33826	6.64197	6.40775	6.68457	6.78243	5.93499	6.69384	6.75959	6.638	6.94778	6.46154	6.5521	6.69582	5.96551	6.22343	6.61191	6.38501	6.13944	6.01637
	CLM75_RS01485	6.04357	7.13704	6.55013	7.43346	6.2668	7.55504	7.31258	7.20746	7.40144	7.12632	5.87957	7.44045	7.34335	7.13686	6.43219	7.28487	6.22541	7.30325	6.98686	6.56603	CLM75_RS01485	4.7627	5.23729	5.4594	5.48628	5.63355	5.5329	5.10456	5.97688	5.91164	5.35428	5.90658	5.00172	5.06262	5.50007	5.63397	5.3748	5.22234	5.44231	5.67006	5.03905
	CLM75_RS01495	9.19886	9.02461	9.13233	8.82848	9.18028	9.08403	8.6535	9.12895	8.75486	8.99805	8.8758	9.10425	8.77846	9.01012	9.04203	9.073	9.18448	8.91329	9.27866	9.02953	CLM75_RS01495	7.51556	7.77571	7.65862	8.17091	7.4005	7.57841	8.17183	7.83146	7.66153	7.81884	7.57909	7.72028	7.74191	7.4771	8.32416	8.24997	7.72808	7.73948	8.26343	7.64792
	CLM75_RS01500	6.21796	7.03483	6.65812	6.40097	6.54482	7.1009	7.06371	6.48101	6.67749	6.81591	6.20306	6.69263	7.06706	6.43954	6.27343	6.73193	5.99528	7.12639	7.08042	6.54177	CLM75_RS01500	5.84191	5.99147	5.83797	6.07063	5.96702	5.89037	5.94051	5.92326	6.11022	5.90396	6.23904	6.13209	6.03478	5.95421	5.91327	6.07167	5.9901	5.91505	6.19874	5.77246
	CLM75_RS01505	6.65027	6.82318	6.54451	7.03194	6.65225	7.67345	6.71835	6.6589	6.68437	7.01429	6.50152	6.71758	7.11846	6.68901	6.63304	6.43148	6.40481	6.65252	7.36318	6.5847	CLM75_RS01505	5.20488	5.63336	5.38693	5.5119	5.57167	5.44666	5.59731	5.39591	5.41228	5.46465	5.45513	5.22635	5.28967	5.00037	5.9181	5.61555	5.52315	5.32908	5.72606	5.30591
	CLM75_RS01510	7.01619	5.68322	6.48975	6.80842	7.06773	6.91067	5.9238	6.75666	5.51134	6.80953	7.02357	6.45884	6.02297	6.22056	6.85298	6.14408	6.67332	5.87129	6.60786	6.60313	CLM75_RS01510	4.84406	5.21408	4.91104	5.13607	5.05186	4.81911	5.13515	5.20718	5.19271	5.20231	4.98891	4.89889	5.02706	4.64495	5.13387	5.14404	5.13565	4.89081	5.15865	4.76629
	CLM75_RS01515	6.47539	5.04497	5.95398	6.11961	6.47395	6.06619	5.10118	6.01602	4.61864	5.94976	6.646	5.98875	5.14975	5.57964	6.15558	5.64584	6.07171	5.31086	5.90109	6.15234	CLM75_RS01515	3.67485	4.32085	4.10662	4.38099	4.10172	4.25482	4.32886	4.26208	4.42267	4.35803	4.1612	4.48042	3.73119	3.71304	4.23627	4.50943	4.58203	3.99321	4.53052	3.60971
	CLM75_RS01520	8.35782	6.69696	7.83771	8.16284	8.14853	7.94143	7.0258	8.05351	6.69417	8.04793	8.46587	7.73854	6.74373	7.53894	7.94647	7.36259	7.88771	7.16572	7.64692	8.01327	CLM75_RS01520	6.28865	6.58019	6.37534	6.83115	6.56005	6.46609	6.71026	6.64638	6.63478	6.87206	6.67549	6.3314	6.08752	6.24534	6.71033	6.77379	6.36664	6.255	6.82486	6.15513
	CLM75_RS01525	6.64589	5.43496	6.06944	6.47932	6.66224	5.9825	5.63778	6.40215	5.55543	6.54293	5.91369	6.88024	5.05761	6.369	6.27343	6.10861	6.39254	5.55683	6.04248	6.79428	CLM75_RS01525	5.27697	5.59102	5.56841	6.04892	5.58386	5.34845	5.9159	5.85066	5.74592	5.87639	5.88538	5.59458	5.65843	5.17001	5.68302	5.99929	5.2628	5.43051	6.0665	5.12361
	CLM75_RS01530	5.51549	4.87875	5.21563	5.62253	5.71795	4.99465	4.90278	5.46135	4.93353	5.77376	4.92145	5.95768	4.79277	5.40423	5.56582	5.30531	5.56352	4.97516	5.43938	5.90916	CLM75_RS01530	4.5142	4.66956	4.39227	4.85131	4.44902	4.56857	4.46643	4.8529	4.66876	4.94049	5.14661	4.11142	4.73912	4.31552	4.71269	4.87567	4.57561	4.434	4.87941	4.3701
	CLM75_RS01535	5.2828	5.00577	5.19099	5.708	5.60225	5.437	5.15693	5.52692	5.2172	5.71669	4.57295	5.68353	5.08054	5.37432	5.44799	5.19982	5.36403	5.33694	5.4519	5.88165	CLM75_RS01535	3.46266	3.92891	3.84414	4.0417	3.98099	3.61188	4.25483	4.05573	4.00286	4.35108	4.03362	4.20938	4.06509	3.63046	4.77257	4.13567	4.12708	3.99535	4.09771	3.74608
	CLM75_RS01540	5.80927	5.84743	5.79875	6.58925	6.68124	6.29606	5.78966	6.46901	5.8386	6.29574	5.29365	6.39306	5.80872	6.2492	6.46154	6.0922	6.31139	6.04595	6.14834	6.56113	CLM75_RS01540	4.23371	4.72366	4.56643	4.64394	4.91869	4.58385	4.77619	4.86256	5.00548	4.97028	4.91199	4.14848	4.67163	4.61587	5.05715	4.61888	4.71922	4.69034	5.07882	4.32551
	CLM75_RS01545	5.87543	6.04712	6.4083	5.9152	5.84345	6.21246	5.94507	5.60826	5.89452	5.93625	5.74847	5.89429	5.6971	5.7981	5.99399	6.19416	5.62942	5.71197	5.87591	5.83	CLM75_RS01545	5.82743	6.29098	6.31004	6.33112	7.33502	5.90371	5.85121	7.21308	7.21909	7.19239	7.27123	5.60795	5.67576	6.30682	6.08412	6.15239	5.69121	6.3344	6.501	6.08176
	CLM75_RS01550	5.52594	5.10035	5.54107	5.62734	5.47917	6.14937	5.11511	5.53933	5.28093	5.62778	5.25993	5.08792	5.74346	5.59298	5.61282	5.24295	5.27292	5.487	5.97236	4.8103	CLM75_RS01550	3.83396	4.7652	4.40066	4.13326	4.45346	4.05609	4.28738	4.14818	4.19876	4.29424	4.36105	3.94864	4.8552	4.34308	4.69592	4.16604	4.55621	4.37612	4.19266	4.22826
	CLM75_RS01555	5.56191	5.56469	5.61116	6.13702	5.66166	6.51064	5.39462	5.81998	5.92154	6.19411	4.96674	5.12138	6.17418	5.91091	5.7229	5.60478	5.25179	5.76553	6.39091	4.8724	CLM75_RS01555	4.04638	4.55675	3.93242	4.00158	4.22096	3.69862	4.27494	3.80654	3.91712	4.12121	3.41825	3.87537	4.18288	3.85764	4.55423	4.27456	3.36528	4.27241	4.34348	4.33592
	CLM75_RS01560	5.02868	5.08764	5.1186	5.32186	5.0121	5.94271	5.12325	5.42072	5.36945	5.50998	4.44943	4.92117	5.76277	5.23345	5.01536	5.18575	4.76172	5.77646	6.07792	4.53726	CLM75_RS01560	4.21603	4.75369	4.09426	4.32067	4.29448	4.10888	4.27245	3.92963	4.17125	4.1773	4.05714	4.26445	4.23056	4.3993	4.76722	4.22493	4.20391	4.22947	4.42893	4.67901
	CLM75_RS01565	9.65097	9.28422	9.68611	9.72883	9.46011	9.92475	9.28607	9.76774	9.32849	9.90975	9.75238	9.5327	9.28424	9.72676	9.67897	9.30993	9.77763	9.28157	9.52545	9.43793	CLM75_RS01565	7.66207	8.3843	8.2992	8.26041	7.98645	7.7654	8.41118	8.20285	8.03368	7.84474	7.77953	7.9481	8.06485	7.98898	8.62146	8.27649	7.86942	8.14795	8.33274	8.37837
	CLM75_RS01570	7.2617	7.28156	7.43469	7.39673	7.26115	7.95682	7.47175	7.50753	7.31408	7.64517	7.45987	7.39894	7.48046	7.43363	7.32409	7.32495	7.35353	7.54283	7.52521	7.29776	CLM75_RS01570	5.77407	6.73935	6.25373	6.1089	6.28511	5.49374	6.37321	6.1177	6.01885	5.63454	5.77535	6.28305	6.15908	6.11552	6.71588	6.14555	5.70596	6.11408	6.31687	6.52104
	CLM75_RS01575	5.99741	6.02259	6.23015	6.735	6.21069	6.47629	6.00486	6.51057	5.6872	6.36363	4.73442	6.08849	5.94281	6.69971	5.88887	6.06506	6.19481	6.03081	6.72736	4.90009	CLM75_RS01575	5.28547	5.52243	5.2073	5.60782	5.33385	4.6447	5.67601	5.3537	5.37324	5.43044	5.37551	5.12586	5.38406	5.40521	5.26473	5.56002	4.94241	5.77899	5.56355	5.626
	CLM75_RS01580	4.29257	5.21271	4.94028	5.0397	4.63391	5.63679	5.58691	4.96864	4.9778	5.12169	4.02064	5.13569	5.5259	5.16929	4.41003	5.28812	4.56068	5.52423	5.35922	4.88812	CLM75_RS01580	3.69732	4.34735	3.93242	3.77439	4.06162	3.75859	4.11116	3.65537	3.58317	3.98867	3.63694	3.46954	4.63666	3.84998	4.36208	4.04216	3.77085	4.12986	4.17357	3.89434
	CLM75_RS01585	3.00852	3.35816	3.19867	3.43212	3.04743	3.74458	3.5778	3.33028	3.21962	3.36979	2.71064	3.14096	3.23648	3.34261	2.78985	3.56575	3.19155	3.57961	3.30052	3.1464	CLM75_RS01585	2.9667	2.86112	2.82015	2.71849	3.05201	3.09632	2.74969	3.04944	3.00972	3.18966	2.42594	3.30201	3.51718	3.04882	3.14503	2.66445	3.66613	3.22295	3.05357	2.88104
	CLM75_RS01590	4.64853	4.49757	4.63085	4.41121	4.51009	4.79664	4.67267	4.4986	4.58246	4.50885	4.17334	4.6129	4.77635	4.4781	4.25024	4.63093	4.57601	4.85397	4.88129	4.62068	CLM75_RS01590	3.33747	3.60943	3.30081	3.52676	3.51775	3.2574	3.81742	3.22701	3.28537	3.35163	2.97524	3.30857	3.6863	3.24273	3.81753	3.60571	3.39471	3.59125	3.35928	3.59822
	CLM75_RS01595	6.26236	5.83272	6.1177	6.17041	6.43436	6.77891	5.60504	6.28491	5.83726	6.06064	6.14144	5.42268	5.88117	6.02362	6.27996	5.8532	6.10704	5.77055	6.66168	5.46917	CLM75_RS01595	3.51781	3.72678	3.24226	3.84411	3.69673	3.78045	4.20327	3.68835	3.72657	3.51601	3.38145	3.68163	4.16663	3.73402	4.31892	4.02403	3.71944	3.41404	3.73674	3.4905
	CLM75_RS01605	7.65532	8.07293	7.77694	7.7027	7.54449	7.95006	7.7456	7.84259	7.89503	7.87077	7.35643	8.32715	8.27099	7.77747	7.66609	7.66074	7.58616	7.94909	8.04426	8.16316	CLM75_RS01605	6.14133	6.15977	6.45605	6.63965	5.95769	6.47357	6.7061	6.41148	6.28795	5.87155	6.19267	6.04927	6.34025	6.15182	6.90409	6.64035	6.34324	5.99254	6.73332	6.1453
	CLM75_RS01610	7.04401	7.65154	7.27114	6.92695	7.13733	7.00729	7.82855	7.23633	7.6811	7.33299	7.25416	7.66547	7.91324	7.07918	7.19532	7.30352	6.85899	7.98222	7.02563	8.06392	CLM75_RS01610	6.56919	6.2465	6.30513	6.52757	5.96702	6.56246	6.48538	6.28334	6.4727	6.22514	6.18602	6.38052	6.25058	6.56384	6.58537	6.51735	6.64903	6.15958	6.66426	6.05365
	CLM75_RS01615	9.02614	9.70065	9.24044	9.05574	9.12005	8.98509	9.70648	9.49924	9.51912	9.27905	9.17946	10.0893	9.63568	9.2434	9.21648	9.50198	9.07439	9.91524	9.03001	10.1821	CLM75_RS01615	8.37928	8.00877	8.31593	8.64565	8.10692	8.69741	8.3694	8.42046	8.50467	8.37389	8.36039	8.30357	8.62018	8.46594	8.23119	8.56099	8.84613	8.17496	8.61482	8.13527
	CLM75_RS01620	7.47324	7.31626	7.11657	6.53357	7.68448	7.19432	7.14807	7.39863	7.09289	6.51407	6.16713	6.87768	7.50035	7.4691	8.13356	7.65581	7.54287	7.65641	7.4612	6.84348	CLM75_RS01620	5.48867	5.09729	5.21588	5.42018	5.09081	5.5535	5.24504	5.35883	5.45093	5.18678	5.14798	5.57293	5.75941	5.52676	5.60432	5.52939	5.87342	5.33753	5.35585	5.16118
	CLM75_RS01625	7.43311	7.92907	7.32784	7.57948	7.37857	8.33533	8.01697	7.46472	7.72704	7.65814	7.02691	7.46616	8.04951	7.76439	7.41692	7.56408	7.62423	8.11939	8.51205	7.20596	CLM75_RS01625	5.77029	6.93731	6.27259	6.55709	6.40099	5.40271	6.66381	6.0878	6.04645	6.47734	6.17799	6.39138	6.29237	5.92806	7.11223	6.65462	5.87342	6.54058	6.65978	6.58718
	CLM75_RS01630	6.88508	7.34795	6.94692	7.1181	6.99334	7.78142	7.11296	7.15023	7.18429	7.29427	6.55286	6.56997	7.21242	7.25587	7.12389	6.95606	6.876	7.09653	7.9138	6.2659	CLM75_RS01630	5.28016	6.27985	5.51609	6.04947	5.63453	4.6354	6.16597	5.46149	5.49413	5.83838	5.46175	5.60795	5.20469	5.64108	6.36439	6.00854	5.30798	5.72526	6.08154	5.99573
	CLM75_RS01635	4.53592	5.21477	4.68571	4.84254	4.61427	5.68333	4.9447	5.10489	5.00836	4.86063	4.23325	4.72124	5.34839	5.12904	4.75693	4.85649	4.71136	4.93181	5.7382	4.30299	CLM75_RS01635	3.37777	4.3947	3.94624	4.17395	3.90208	3.52246	4.17678	3.76935	3.77814	3.95697	3.771	3.93173	4.36482	3.80708	4.61496	4.23356	3.64178	4.05805	4.24142	4.5054
	CLM75_RS01640	6.58434	6.54119	6.65054	6.99608	6.75447	7.46376	6.40294	7.03226	6.448	6.90312	6.2331	6.54231	6.87023	6.92821	6.9346	6.73375	6.55188	6.67728	7.59612	5.94313	CLM75_RS01640	5.05013	5.92924	5.53222	6.03298	5.61685	4.90564	5.9167	5.40144	5.56337	5.34731	5.59326	5.57429	5.36282	5.51348	6.20954	5.90159	5.09589	5.66611	5.98167	5.8532
	CLM75_RS01645	6.88339	6.2067	6.78829	6.66382	7.00627	7.09973	5.99381	6.93195	5.92185	6.61872	6.46746	6.48758	6.26351	6.78464	7.13134	6.69016	6.64733	6.21083	7.34271	5.87681	CLM75_RS01645	5.25117	5.68535	5.36652	5.61078	5.3636	4.78347	5.87117	5.3237	5.45917	5.59685	5.4238	5.40391	4.9998	5.48283	5.66015	5.6128	5.29828	5.59107	5.6955	5.53705
	CLM75_RS01650	5.69513	6.07352	5.96626	5.97641	5.69554	6.24299	6.21929	6.02488	5.94589	6.04927	5.47895	6.09363	6.02436	5.9609	5.80933	6.10675	5.93986	6.09116	6.16922	5.78873	CLM75_RS01650	4.97199	5.34422	5.27183	5.16562	5.2899	4.98414	5.31472	5.13393	5.12183	4.82485	5.20437	5.03773	5.34848	4.83163	5.45284	5.25487	5.41059	5.30602	5.32757	5.30943
	CLM75_RS01655	4.20862	4.81578	4.00313	4.08687	4.14297	4.59933	4.75352	4.26878	4.70459	4.23051	3.98256	4.41594	4.68954	4.31634	4.09163	4.71542	3.98941	4.90799	4.55277	4.27568	CLM75_RS01655	4.11713	4.14068	4.16491	4.08501	4.08181	4.47486	4.25483	4.18073	4.35364	4.13746	4.12826	4.07338	4.8952	3.8879	4.49082	4.11714	4.5166	4.06417	4.25405	4.15174
	CLM75_RS01660	5.81992	5.78165	5.70113	5.7148	5.71488	6.03211	5.85756	5.99815	5.64358	5.79637	5.26749	5.82534	5.90403	5.74908	5.65184	6.02757	5.38091	6.11001	6.15653	5.60706	CLM75_RS01660	5.5718	5.53401	5.42197	5.42777	5.60991	5.63174	5.40191	5.35713	5.57974	5.29937	5.59527	5.48438	5.4858	5.60738	5.54312	5.49631	5.55446	5.48933	5.5826	5.20917
	CLM75_RS01665	8.33486	8.22727	8.19929	8.25938	8.33855	8.14326	8.04732	8.20836	8.12152	8.28137	8.06406	8.0111	8.01877	8.12531	8.28195	8.11364	8.17359	8.06683	8.08677	7.81122	CLM75_RS01665	7.80876	7.97376	7.76203	8.01015	7.81355	7.81287	7.83265	7.79702	7.90366	7.76004	8.04864	7.70138	7.99294	7.81686	7.69594	7.894	7.95001	7.80812	7.9412	7.88677
	CLM75_RS01670	6.99222	7.58195	7.31949	7.15213	7.08121	7.8746	7.72783	7.32885	7.42673	7.11027	6.75759	7.41046	7.61124	7.39484	7.02425	7.52879	7.12193	7.74371	7.73426	7.37616	CLM75_RS01670	6.68011	6.79335	6.64126	6.57733	6.72364	6.46534	6.78054	6.65613	6.62777	6.84325	6.63553	6.67599	6.65471	6.62574	6.74471	6.60449	6.72195	6.7576	6.81091	6.64065
	CLM75_RS01675	8.55184	8.30206	8.28035	8.37433	8.64917	8.72685	8.48308	8.54158	8.42533	8.61935	8.36032	8.13576	8.51275	8.44855	8.61202	8.24841	8.58178	8.43675	8.57979	8.18889	CLM75_RS01675	7.97971	8.09738	7.94638	8.27322	7.80164	8.01001	8.04028	8.07005	8.14158	8.02203	7.91523	7.90299	8.04832	8.01577	8.1733	8.15786	8.20724	7.99117	8.25157	7.92262
	CLM75_RS01680	5.97344	6.1503	5.87398	6.06029	6.12943	6.83955	6.66222	6.03993	6.34847	6.38051	5.91514	6.07815	6.76136	6.24113	6.17837	6.03887	6.08578	7.12799	7.02172	6.13724	CLM75_RS01680	5.226	6.29892	5.54892	5.7942	5.35888	5.11032	5.90384	5.33184	5.31298	5.24417	5.01767	5.54262	5.65261	5.40651	6.32494	5.74543	5.49625	5.5953	5.96255	5.73361
	CLM75_RS01685	6.40876	6.30232	6.08219	6.85202	6.38837	7.18726	6.62775	6.67827	6.32152	6.81776	6.207	6.27844	6.84249	6.8072	6.63364	6.2417	6.51779	6.52518	7.18338	5.98533	CLM75_RS01685	5.18684	6.27468	5.9718	5.89924	5.69757	5.27593	6.18204	5.54238	5.53547	5.37498	5.3146	5.57973	5.54985	5.74184	6.57165	6.01481	5.50976	5.86508	6.08783	6.09408
	CLM75_RS01690	9.77218	9.28724	9.59985	10.0947	9.53725	10.3327	9.36616	10.1175	9.19306	10.2066	9.02181	9.88216	9.55083	10.0596	9.54628	9.75474	9.9201	9.42401	10.399	9.35063	CLM75_RS01690	7.73738	8.7687	8.37364	8.74746	8.13031	7.48184	8.95169	8.21838	8.10206	8.15043	7.86009	8.59745	8.34671	8.25018	9.31125	8.78104	7.97823	8.39655	8.84134	8.62135
	CLM75_RS01695	5.50585	5.63984	5.49733	5.80738	5.35155	6.29482	5.83742	5.75458	5.66216	5.99461	4.98611	5.68936	5.72389	5.88648	5.50745	5.67385	5.76315	5.90613	6.48895	5.4473	CLM75_RS01695	4.49601	4.67741	4.3889	4.8488	4.45124	4.21613	4.74408	4.21508	4.42007	4.35108	4.23007	4.39664	3.73119	4.21469	5.30952	4.79245	4.04592	4.32774	4.909	4.09157
	CLM75_RS01700	3.71933	4.09769	3.98213	3.9513	3.99389	4.00965	3.89727	4.01064	3.77962	3.90058	4.02778	3.88983	4.09434	3.74819	4.02552	3.91624	3.99644	4.00217	3.73691	3.69506	CLM75_RS01700	3.525	3.21535	3.30439	3.2121	3.31338	3.41166	3.32334	3.20186	3.53362	3.2281	3.44969	3.27545	2.88375	3.67451	3.81753	3.21343	3.61077	3.36529	3.56483	3.32614
	CLM75_RS01710	4.72607	6.92608	5.57454	5.46395	4.88947	4.81622	6.68905	5.15874	6.97238	5.92105	5.21137	5.50985	6.77878	5.31552	5.05977	5.56114	5.10996	6.0051	4.9687	5.32205	CLM75_RS01710	5.60782	5.33432	5.61169	5.73901	5.48985	5.5329	5.7676	5.83929	5.85801	5.88604	5.92027	5.47566	5.94711	5.64662	5.05277	5.64711	5.24877	5.53118	5.47817	5.46457
	CLM75_RS01715	4.63894	5.5446	4.78087	4.87935	4.30283	3.97523	6.17419	4.55557	5.79733	5.09041	4.59595	4.7079	5.2871	4.43697	4.6292	5.10951	4.75241	5.24155	3.88954	5.05165	CLM75_RS01715	4.71945	4.59411	4.78981	4.69795	4.42664	4.80969	4.42652	4.95203	4.92266	5.08363	4.84769	4.68599	5.29716	4.89445	4.46465	4.5224	4.77344	4.52707	4.57931	4.63753
	CLM75_RS01720	4.32881	4.68095	4.46773	5.23301	4.2121	5.33448	5.35302	4.65178	4.85921	5.57683	4.37438	4.94898	5.24713	4.87863	4.48242	4.75528	4.39906	5.26567	4.92506	4.85405	CLM75_RS01720	3.58131	4.04409	3.67462	3.8691	3.77676	3.59553	3.56308	3.68109	3.75155	3.7023	3.53173	3.56584	2.99836	3.62597	4.01074	3.51187	3.71361	3.30796	3.61141	3.51514
	CLM75_RS01725	8.7448	8.82615	8.84995	9.26498	8.66437	8.87927	9.67973	9.02365	9.6997	9.51856	8.92295	8.51552	9.79403	8.75962	8.92426	8.54172	8.91901	8.91515	8.66347	8.40221	CLM75_RS01725	8.06749	9.0943	8.77036	9.09758	8.88959	7.87105	9.2366	8.61584	8.68591	8.67596	8.72989	8.91618	8.70561	8.53508	9.03023	9.17667	8.3368	8.75695	9.05388	9.229
	CLM75_RS01730	8.09231	8.22735	7.8603	8.16377	8.13251	9.09998	8.29088	8.07071	8.42249	8.13432	7.86314	7.59627	8.64619	8.32829	8.28806	7.82796	8.10159	8.35122	8.9182	7.38726	CLM75_RS01730	6.52815	7.37887	7.17097	7.23411	6.88868	6.64686	7.32014	7.07617	7.09282	6.69125	6.95053	6.7484	6.81708	7.0259	7.77725	7.42115	6.88961	7.12841	7.56591	7.11026
	CLM75_RS01735	10.4475	8.73861	9.91985	10.3104	10.3457	10.9104	8.97863	10.7049	8.87439	10.1662	9.80028	9.24776	9.51824	10.6279	10.5014	9.70012	10.5134	8.79492	10.8596	8.35045	CLM75_RS01735	7.74914	8.80126	8.71324	9.03388	8.22801	7.76113	8.80787	8.62751	8.61861	8.15243	8.35728	8.38444	8.47844	8.56509	9.72849	9.00206	8.35587	8.65458	9.30698	8.62029
	CLM75_RS01740	3.1946	2.85713	2.63256	2.95338	2.88209	3.55466	3.44908	3.01193	3.43784	2.91602	2.65639	3.19115	3.73167	3.204	2.97922	3.182	3.17925	3.59821	3.48079	2.58286	CLM75_RS01740	2.19586	2.827	3.10526	2.77777	2.36937	1.86351	2.29754	2.89164	2.59694	2.37348	1.88414	2.11447	1.06451	2.34708	3.38714	2.74311	3.04163	2.99411	2.86509	2.30638
	CLM75_RS01745	7.41871	7.85877	7.6984	7.57731	7.38656	7.29484	7.85944	7.32604	7.90748	7.8865	7.83505	7.99294	7.85714	7.17164	7.15869	7.10747	7.42282	7.75849	7.06393	8.63624	CLM75_RS01745	9.5199	9.05991	9.30108	9.57486	9.16285	9.53525	9.16934	9.65507	9.63307	9.5614	9.58586	9.51068	9.53045	9.41121	9.10809	9.41187	9.82178	9.31726	9.41735	9.34201
	CLM75_RS01750	7.59811	7.41217	7.49498	7.28875	7.61536	7.4634	7.31258	7.34131	7.32756	7.47006	7.48878	7.37471	7.44141	7.3048	7.44914	7.35612	7.30429	7.67027	7.48292	7.36476	CLM75_RS01750	6.68854	6.64771	6.40442	6.63893	6.55232	6.77125	6.49506	6.5003	6.69505	6.70835	6.5909	6.74417	6.69775	6.68993	6.58841	6.49987	6.87141	6.67333	6.71084	6.53992
	CLM75_RS01755	6.79439	6.28245	6.71379	6.30502	6.85864	6.25063	6.09573	6.55621	5.98136	6.5502	6.95873	6.53747	6.01599	6.34983	6.66038	6.44779	6.74835	6.20915	6.38874	6.74267	CLM75_RS01755	6.47805	5.99007	6.2318	6.35255	5.93488	6.53843	6.31003	6.35526	6.42238	6.4467	6.3663	6.23044	6.51408	6.37716	6.06029	6.24065	6.67099	6.19116	6.28131	6.05575
	CLM75_RS01760	7.11808	7.70709	7.44678	7.64671	7.0981	8.25942	7.99019	7.65493	7.85528	7.82542	7.02736	7.55614	8.06193	7.58247	7.34145	7.43429	7.36341	7.79389	8.2239	7.59325	CLM75_RS01760	7.51059	8.20098	7.95922	7.81158	7.94906	7.48369	7.8666	7.91539	7.87647	7.75446	7.75457	7.92772	7.94015	7.74404	8.14165	7.87113	7.75882	7.95565	7.91037	8.13402
	CLM75_RS01765	7.50285	7.48495	6.9473	6.45039	7.41119	6.98736	7.61581	6.86486	7.62449	6.43961	7.05274	6.97996	7.16084	6.61304	7.12475	6.75446	7.66132	7.47357	6.318	7.68297	CLM75_RS01765	6.82743	6.74476	7.37421	7.29348	6.55593	6.70358	6.88322	7.34402	7.24094	7.02399	6.93316	7.02193	7.12315	6.85839	7.92129	7.29525	6.78514	6.77606	7.22696	6.66219
	CLM75_RS01770	8.03115	8.38749	7.77585	7.20585	8.0669	7.67881	8.45756	7.64512	8.23975	7.25769	7.65898	7.70343	8.14167	7.33869	7.9827	7.44615	8.14719	8.40394	7.04587	8.32247	CLM75_RS01770	7.40827	7.24567	7.82727	7.62739	7.27397	7.61706	7.36335	7.66208	7.72296	7.43476	7.6658	7.35289	7.6543	7.61518	7.91948	7.67415	7.65851	7.6458	7.72514	7.34572
	CLM75_RS01775	8.52758	9.60242	8.85408	8.95055	8.4871	6.3504	9.52355	8.29534	9.38453	9.30252	9.044	9.50093	8.65531	8.50908	8.18071	8.89972	8.6584	8.85964	6.73147	9.17166	CLM75_RS01775	9.41573	8.78424	9.24319	8.94183	8.53816	9.79972	8.22983	9.22407	9.27091	8.83712	9.08631	9.15881	9.38835	9.34843	8.9166	8.63838	9.76278	8.82569	8.89476	8.60638
	CLM75_RS01780	5.69744	6.76192	6.28875	6.77435	5.73396	6.10323	7.25746	6.14459	6.7548	6.79497	5.89234	6.78268	6.93493	6.41002	5.73916	6.50736	5.98649	6.74817	6.26505	6.36427	CLM75_RS01780	5.17431	5.57989	5.10833	5.16158	4.97684	4.94704	5.49811	4.97077	5.14165	5.09823	4.98432	5.03179	5.31938	5.25516	5.6103	5.24424	5.01291	5.28869	5.23358	5.62742
	CLM75_RS01785	4.45624	6.16816	5.10894	5.26736	4.48146	4.80934	5.96467	5.10846	5.83392	5.46834	4.38693	5.31614	5.59215	5.12904	4.43365	5.4668	4.70064	5.41771	5.01106	5.05057	CLM75_RS01785	3.81353	4.19153	4.12901	4.37228	3.76966	4.16719	4.31193	3.76248	3.96241	3.60049	3.87723	3.98598	4.01151	3.92484	4.3262	4.13567	3.74252	4.29514	4.19703	4.07094
	CLM75_RS01790	6.10233	5.68123	5.96473	7.28989	6.04699	5.04042	6.1513	5.44448	5.93095	7.39762	5.64952	6.34276	5.15358	6.29149	5.31892	5.58882	6.13914	5.06854	5.0826	5.57305	CLM75_RS01790	6.40826	5.61757	5.91846	5.24509	5.47575	6.53558	5.2232	6.00588	5.95933	5.67128	6.00056	5.91375	6.49468	6.1933	4.72376	5.05109	6.3805	5.65128	5.15116	5.8724
	CLM75_RS01795	4.27204	4.79294	4.54547	5.21152	4.05829	4.08945	5.0111	4.18776	4.88462	5.41663	4.10577	5.13712	4.50847	4.40017	4.10553	4.41866	4.46006	4.62417	3.5162	4.8977	CLM75_RS01795	4.19814	3.71495	3.93704	3.18051	3.85593	4.19459	3.53832	3.62919	3.89113	3.94779	3.96998	4.10766	4.04745	4.0901	3.07757	2.98036	4.32351	4.01234	3.45238	4.01588
	CLM75_RS01800	5.03113	5.32142	5.16726	5.46462	5.21043	4.48307	5.30733	5.00872	5.3814	5.77445	4.82739	5.44813	4.60091	4.89538	4.88337	5.16796	5.05465	5.01262	4.28996	5.55423	CLM75_RS01800	4.69573	4.54345	4.57386	3.70668	4.55392	4.9556	3.85466	4.74297	4.64895	4.91008	4.6569	5.0098	4.46124	4.72882	3.38714	3.70213	5.08012	4.56786	4.04698	4.44255
	CLM75_RS01805	7.05727	8.04343	7.5058	7.28381	6.9119	6.53761	7.48664	7.5648	7.68916	7.69408	6.93779	8.0999	7.28504	7.33995	7.2986	7.51637	6.77029	7.4779	6.42899	8.07611	CLM75_RS01805	9.29524	8.64459	9.13	8.90243	8.88375	9.83794	8.40249	9.22211	9.31344	8.92252	9.36439	8.88934	9.13059	9.21159	8.52228	8.90619	9.40799	8.81989	8.65732	8.55457
	CLM75_RS01810	5.47743	6.26629	5.70113	5.73391	5.3236	4.67573	6.63203	5.47433	6.21586	5.9421	5.35526	6.5631	6.09626	5.44494	5.42807	6.06025	5.68321	6.18474	4.72086	6.44086	CLM75_RS01810	5.58649	4.93059	5.28004	5.47085	4.96291	5.73237	5.2514	5.54138	5.53487	5.26651	5.40559	5.36349	5.08873	5.60965	5.13387	5.48491	5.82289	5.24085	5.20927	5.05174
	CLM75_RS01815	4.82666	6.24389	5.34583	5.08417	4.47058	4.48595	6.24823	4.97257	6.1649	5.4954	4.83555	5.67767	6.01599	4.75455	4.7777	5.23528	4.52468	6.01398	4.53562	5.79451	CLM75_RS01815	4.88658	4.705	4.74834	4.81704	4.73055	5.0881	4.90118	4.9633	4.86659	4.98607	4.95957	5.00577	5.16434	4.7761	4.3262	4.74193	5.1807	4.71908	4.82869	4.71934
	CLM75_RS01820	5.66079	6.40833	6.3936	6.44529	5.45269	5.47445	6.53535	5.72772	6.53988	6.48546	5.82783	6.0307	6.92677	5.7807	5.36878	5.78714	4.87567	6.38996	5.85783	6.26033	CLM75_RS01820	5.56396	5.67885	5.27274	5.62626	5.41793	5.31971	5.787	5.39424	5.36315	5.56866	5.47054	5.57837	5.3046	5.25661	5.21066	5.49691	5.59147	5.4431	5.42391	5.67467
	CLM75_RS01825	4.43792	5.54787	4.98168	5.19133	4.17684	4.51302	5.17583	4.54154	5.62977	5.11951	4.68333	4.9842	5.83354	4.53954	4.23767	4.66431	4.05651	5.08329	4.42988	4.95278	CLM75_RS01825	4.43046	4.37229	4.27488	4.0373	4.45346	4.29924	4.20851	4.0288	4.30805	4.54016	4.39606	4.17027	4.63666	4.30154	3.92698	4.00903	4.05517	4.36459	4.11012	4.05001
	CLM75_RS01830	4.96997	5.45605	5.57854	5.62975	4.6944	4.86127	5.56558	5.09771	5.3168	5.50458	5.15215	5.25454	5.8827	5.05908	4.79604	5.00216	4.72623	4.98226	5.06966	5.5565	CLM75_RS01830	5.8455	5.27861	5.27457	5.57326	5.28866	5.46177	5.48414	5.36338	5.32967	5.72334	5.57199	5.49161	5.40499	5.50862	5.00818	5.46367	5.43382	5.35178	5.25957	5.56683
	CLM75_RS01835	4.18684	4.42693	4.94183	4.83735	4.04857	3.87992	4.26397	4.27515	4.17147	4.60516	4.73005	4.5923	4.53605	3.81805	3.6353	3.97061	3.9079	3.88249	4.16775	4.4617	CLM75_RS01835	5.29287	4.46697	4.83879	5.15245	4.67847	5.36623	4.95828	5.10844	5.25373	5.0237	5.22658	4.91189	5.29716	5.08605	4.57272	4.88574	5.22848	4.88966	4.72963	5.04117
	CLM75_RS01840	5.42072	4.91729	5.07107	5.0833	5.33664	3.63469	4.92808	4.94751	4.90578	4.82841	5.23932	5.05969	4.54577	4.56193	5.39165	5.11044	5.01627	4.75704	3.50342	5.58349	CLM75_RS01840	4.06378	3.60028	3.82681	3.30661	3.88905	3.91828	3.24901	3.97488	4.02522	3.52838	3.78867	3.61434	4.24611	3.83064	3.63014	3.04716	3.90985	3.78657	3.42532	3.44634
	CLM75_RS01845	4.13774	4.60639	4.37409	3.95514	3.90239	3.68066	4.88948	3.82616	4.49968	4.04264	3.95473	4.26269	4.21868	3.87479	4.14478	4.34774	3.89292	4.74781	3.51937	4.47458	CLM75_RS01845	4.44191	4.05619	4.11684	3.77174	4.40391	4.48525	4.06857	4.40008	4.16196	4.39228	4.57983	4.26782	4.19895	4.32937	3.22514	3.81951	4.42685	4.1201	3.64377	3.94963
	CLM75_RS01850	7.03185	7.41352	7.22368	7.38024	6.99112	7.42602	7.53181	7.47213	7.48466	7.49132	6.79574	7.53255	7.47003	7.34516	7.173	7.34745	7.06019	7.49744	7.22823	7.72986	CLM75_RS01850	6.4836	6.87985	6.69784	6.71223	6.7112	6.53415	6.90436	6.66145	6.61761	6.67047	6.6321	6.63414	6.61034	6.55267	6.78755	6.72056	6.50464	6.59867	6.64467	6.94438
	CLM75_RS01855	5.83959	6.40411	6.13616	5.92404	5.83711	5.88606	6.04439	6.09501	6.25361	5.81058	5.80463	6.28936	6.04576	5.86564	5.91329	6.19635	5.95617	6.16338	5.97641	6.17863	CLM75_RS01855	5.36982	5.27171	5.38524	5.40914	5.3096	5.49153	5.3625	5.425	5.3719	5.41052	5.37082	5.27911	5.34848	5.39603	5.52108	5.46733	5.65518	5.46486	5.47277	5.2446
	CLM75_RS01860	8.52063	9.0387	8.80687	8.78218	8.46922	9.2747	9.11094	9.18686	9.07471	8.96133	8.40573	9.06067	9.18444	9.01436	8.76591	8.6442	8.60804	9.21349	9.13508	9.08461	CLM75_RS01860	8.79245	9.14226	9.09773	8.93171	8.93022	8.98104	9.00046	9.11042	9.05574	8.93768	8.79539	9.25126	9.57999	8.90589	9.2783	8.97111	9.25603	9.11549	9.02672	9.20068
	CLM75_RS01865	9.22487	8.82806	9.45158	9.26701	9.18258	9.35156	8.8387	9.34121	8.87857	9.33718	9.18386	9.19056	9.37054	9.30303	9.25977	8.88428	8.96591	9.17425	9.37276	9.47968	CLM75_RS01865	9.02577	9.45128	9.13987	9.24514	9.03656	8.97249	9.32865	9.18873	9.24494	9.14188	9.10327	9.39052	9.31882	8.99176	9.51382	9.26666	9.44385	9.33071	9.36916	9.32817
	CLM75_RS01870	2.15275	2.63675	2.99205	2.02843	2.47349	2.76824	2.80355	2.52651	2.84515	2.08648	2.4054	2.28265	2.9447	2.60492	2.74613	2.66275	2.36775	2.90505	2.78177	2.91103	CLM75_RS01870	2.0736	2.25718	2.42554	2.50549	2.18967	2.27287	2.05152	2.38406	2.10961	2.72484	2.42594	1.83416	2.5745	2.18596	2.40879	2.26501	2.19235	2.51708	2.11978	2.24877
	CLM75_RS01875	7.68844	7.48637	7.78865	7.68244	7.83718	8.68196	7.49498	8.22533	7.41861	7.90601	7.19532	7.34053	7.65142	8.10088	8.15775	7.84037	7.65426	7.58256	8.44232	7.01186	CLM75_RS01875	5.62215	6.81567	6.36894	6.60846	6.29565	5.43828	6.85134	6.02321	6.09199	6.05059	5.73399	6.10689	6.43487	6.15182	7.13936	6.75168	6.09356	6.63991	6.82416	6.47074
	CLM75_RS01880	7.12353	6.30556	6.74263	6.70797	7.31663	7.5946	6.11667	7.18422	6.20478	6.71557	6.60928	6.20095	6.50294	7.07205	7.20826	6.77752	6.90312	6.44495	7.55279	5.75154	CLM75_RS01880	4.31483	5.59701	5.00317	5.3031	4.99063	4.11462	5.51407	4.77061	4.77005	4.88142	4.61986	5.1184	4.92449	4.93848	6.1012	5.45816	4.93742	5.27995	5.57199	5.16313
	CLM75_RS01885	7.15724	5.86681	6.65386	7.05111	7.19768	7.48461	5.83396	7.02881	5.78838	6.88309	6.72006	6.16722	6.30875	6.95077	7.18287	6.63328	7.20067	5.95145	7.32942	5.6012	CLM75_RS01885	4.12425	5.52194	4.92855	5.12366	4.8362	4.03805	5.19444	4.81275	4.70225	5.07522	4.60598	4.77401	5.31938	4.58157	5.71111	5.38387	5.07331	5.15835	5.41205	5.31295
	CLM75_RS01890	5.56782	5.47627	5.25243	5.35709	5.59726	5.4788	5.3845	5.51619	5.35087	5.39254	5.2569	5.54029	5.23636	5.42201	5.58207	5.4374	5.45292	5.50574	5.36099	5.57977	CLM75_RS01890	5.03257	4.924	5.04659	5.25176	4.87968	5.21302	4.95204	5.07627	5.16276	5.0039	5.05173	5.12586	5.56853	5.16229	5.12137	4.99721	5.2767	5.02137	5.13227	4.47431
	CLM75_RS01895	7.86456	7.24618	7.46744	7.64121	7.79782	7.09478	7.34807	7.84277	7.90103	7.39806	7.5429	7.83902	7.28475	7.90418	7.74163	7.15317	7.76243	7.62551	7.49387	8.25204	CLM75_RS01895	7.27217	6.40101	6.93579	7.19684	5.32782	7.62513	7.11781	6.33516	6.46548	5.96328	6.08236	7.16264	7.43779	7.11213	7.08243	7.21091	7.71429	6.73731	7.10303	6.47389
	CLM75_RS01900	5.13826	5.28062	5.2871	5.10072	5.03936	5.19537	5.47375	5.10608	5.29655	5.62472	5.10566	5.4343	5.36935	4.97909	4.79497	5.46826	4.70172	5.7751	5.11235	5.69148	CLM75_RS01900	6.31015	5.53401	5.34233	5.37378	5.59494	5.80111	5.59331	5.29485	5.7145	5.66007	5.73854	5.78432	5.80736	5.79069	5.11717	5.58553	6.05144	5.55457	5.64523	5.3528
	CLM75_RS01905	6.97613	6.9113	6.99602	7.20645	6.87593	7.06933	7.00284	7.01681	7.09512	7.31566	7.02914	7.24905	7.23213	7.06249	7.05189	7.0856	6.85416	7.20923	7.12124	7.2583	CLM75_RS01905	6.3613	6.28984	6.25604	6.55555	6.35729	6.35272	6.42758	6.34783	6.35095	6.19344	6.32995	6.30948	5.94711	6.47071	6.43852	6.50226	6.31562	6.28545	6.56859	6.40221
	CLM75_RS01910	6.66531	6.20358	6.56231	6.38185	6.74472	6.61067	6.2538	6.85461	6.23423	6.63326	6.74058	6.83798	6.46399	6.65616	6.78062	6.53573	6.3289	6.65302	6.64905	6.74101	CLM75_RS01910	6.82852	6.11966	6.50977	6.85167	6.55077	6.88043	6.54768	6.5624	6.63002	6.59305	6.73139	6.35933	6.44164	6.75139	6.41991	6.64817	6.67475	6.4484	6.53246	6.37217
	CLM75_RS01915	6.76897	6.6626	6.89809	6.66938	6.88927	6.65421	6.56582	7.03508	6.72264	7.02027	7.08262	7.05905	6.87718	6.85431	6.86708	6.81172	6.77974	6.84978	6.67456	7.09391	CLM75_RS01915	6.16513	5.90826	5.9763	6.41073	6.16115	6.15587	6.47889	6.16598	6.25629	6.19828	6.03725	6.00246	6.03029	6.34549	6.54224	6.39447	6.4195	6.12534	6.55362	6.14431
	CLM75_RS01920	6.75127	6.8391	6.76168	6.70456	6.68282	6.88171	6.65775	6.92217	6.68493	6.80074	6.86665	7.02178	6.99188	6.82273	6.87953	6.74008	6.83052	6.95074	6.708	7.02368	CLM75_RS01920	5.73737	6.16629	6.32906	6.24687	5.89387	6.14795	6.07711	6.23951	6.29221	5.81332	5.95355	5.89751	5.69288	6.29699	6.32494	6.05432	6.32138	6.02377	6.26648	6.0766
	CLM75_RS01925	7.55392	7.56101	7.43937	7.45851	7.47269	7.59326	7.30491	7.52836	7.25158	7.38207	7.47709	7.6667	7.41194	7.39068	7.41011	7.43392	7.46189	7.648	7.56783	7.69058	CLM75_RS01925	6.55608	6.80256	6.84465	6.88972	6.66367	6.73688	6.7845	6.7724	6.69559	6.60916	6.93197	6.68611	6.90541	6.69956	7.15887	7.00328	6.86288	6.77139	6.92176	6.78379
	CLM75_RS01930	8.19978	8.29704	8.13278	8.39787	8.12197	8.30772	7.91204	8.34251	8.28695	8.36312	8.1544	8.1643	8.26158	8.22589	8.18808	8.14046	8.06027	8.33498	8.32946	7.99357	CLM75_RS01930	6.86761	7.27501	6.96437	7.26269	7.19441	6.79531	7.36599	7.0475	6.9181	7.15546	6.9568	7.0816	7.17891	6.80291	7.34787	7.31368	6.90823	7.06571	7.29867	7.14718
	CLM75_RS01935	5.33917	5.99443	5.74276	6.11833	5.59892	6.15707	6.01888	5.98784	5.89805	6.14155	5.26598	5.81293	5.83274	5.86614	5.45003	5.80797	5.30086	6.06018	6.18781	5.78937	CLM75_RS01935	4.81354	5.55168	5.09392	5.35709	5.12178	4.62201	5.43582	4.98189	5.03716	5.13511	5.07496	5.14065	4.70577	5.23471	5.38819	5.31167	5.19958	5.13237	5.52642	5.3006
	CLM75_RS01940	7.63617	8.07113	7.74122	8.18761	7.47949	8.33203	8.27042	7.90592	7.96955	8.30707	7.40865	8.13308	8.03905	8.00145	7.53818	7.87957	7.54467	8.02562	8.3189	8.21693	CLM75_RS01940	7.05915	7.42496	7.21968	7.55261	7.20596	7.15366	7.52274	7.29342	7.32899	7.22791	7.25765	7.1063	6.99557	7.30069	7.48842	7.53534	7.25869	7.14992	7.57279	7.1614
	CLM75_RS01945	6.1334	6.68088	6.34331	6.09591	6.16979	6.49536	6.34741	6.52223	6.69638	5.61627	5.63381	6.28166	6.29901	6.50261	6.24191	6.58751	6.49719	6.42222	5.93835	6.12096	CLM75_RS01945	5.75889	5.2642	5.69795	5.22684	5.38697	5.84902	5.15835	5.67671	5.66385	5.5012	5.61917	5.76774	5.83333	5.81156	5.25331	5.20162	5.76631	5.42339	5.21287	5.41633
	CLM75_RS01950	7.09254	7.63468	7.35815	6.8941	6.95352	6.7745	7.49983	7.35039	7.55819	6.84858	7.41802	7.49724	7.40848	6.98315	6.99724	7.26722	7.1961	7.13491	6.47143	7.79223	CLM75_RS01950	9.16585	8.34375	9.04197	8.52218	9.00972	9.20539	8.55399	9.01458	8.87695	8.72785	9.09379	9.14764	9.63233	9.15431	8.13441	8.65674	9.17764	9.04075	8.28042	9.16621
	CLM75_RS01955	9.13313	9.64456	9.46826	9.12086	9.21649	8.91149	9.62888	9.38552	9.63979	9.38696	9.90463	9.48257	9.31306	9.022	9.26152	9.45572	9.12706	9.36933	8.56479	10.2996	CLM75_RS01955	12.0521	10.9226	11.562	11.6784	11.5871	12.0828	11.5767	11.7309	11.821	11.9384	11.7684	11.7601	11.9277	11.9298	11.0049	11.7684	12.0275	11.7854	11.4557	11.5642
	CLM75_RS01960	2.31411	3.06667	2.83356	2.80396	2.78589	2.58699	2.63625	2.88432	3.03871	2.80144	2.6425	2.88046	2.20917	2.89084	2.89366	3.00894	3.01249	2.9668	2.89371	3.23226	CLM75_RS01960	3.64214	2.69567	2.52098	3.2392	3.12053	3.14581	2.90621	3.0746	3.39514	3.25814	3.30493	2.89413	3.49131	3.01495	3.17761	3.06982	2.91532	3.08122	3.02108	2.9092
	CLM75_RS01965	2.95284	3.40229	2.87322	2.69806	2.99271	3.12669	3.42295	2.75651	3.38402	2.99636	2.8051	3.27628	3.14221	2.87503	3.10567	3.10929	3.11613	3.36465	2.6017	3.40356	CLM75_RS01965	3.40922	3.18384	3.36395	3.45264	3.39864	3.71889	3.0991	3.37614	3.31361	3.81266	3.30983	2.83169	3.29599	3.3874	2.98856	3.2076	3.62325	3.68694	2.98784	3.32614
	CLM75_RS01970	4.9021	4.94159	4.72236	4.56097	4.79813	4.598	4.89043	4.66317	4.59594	4.50553	4.83656	4.98736	4.44338	4.48071	4.92905	4.87744	4.80838	4.97358	4.49425	5.04735	CLM75_RS01970	4.98379	4.43438	4.69477	4.47841	4.79661	5.03554	4.4708	4.58169	4.67965	4.96346	5.00865	4.36234	4.77171	4.69714	3.97411	4.60232	4.88912	4.62005	4.4644	4.41007
	CLM75_RS01975	2.60428	3.09384	2.67805	2.55876	2.7383	2.72502	2.70725	2.60283	2.81292	2.69166	2.20579	3.0289	2.76324	2.49029	2.27234	2.98881	2.2492	3.14326	2.56528	2.95762	CLM75_RS01975	2.28332	1.9864	1.54742	1.73097	1.94712	1.77917	1.83825	1.71987	1.89468	2.81852	1.9102	2.33628	2.62294	1.61003	1.84515	1.43954	2.27381	1.60045	1.78257	1.39111
	CLM75_RS01980	3.42039	3.8243	3.30399	3.21892	2.90921	3.40446	3.40971	3.30973	3.51165	3.34025	3.288	3.599	3.07933	3.28995	3.44337	3.75876	3.20375	3.37906	3.07301	3.86599	CLM75_RS01980	3.52859	3.15912	3.36395	3.11515	3.43047	3.82787	2.79219	3.4634	3.45974	3.81266	3.23961	3.46954	2.84342	3.39269	2.46266	2.84424	3.48642	3.10121	2.56954	2.95495
	CLM75_RS01985	2.85129	3.20045	2.91181	2.87048	2.79755	2.63448	3.33881	2.91185	2.95751	3.11015	2.81752	3.54855	3.04134	3.02579	2.63069	3.11673	2.37855	3.05024	2.172	3.44666	CLM75_RS01985	3.3044	3.12379	3.54741	3.37451	2.91725	3.51089	2.88018	3.32347	3.33581	3.30204	3.35797	3.3851	3.93682	3.53331	2.48886	3.33603	3.50003	2.89684	3.14082	2.76254
	CLM75_RS01990	3.93845	4.78925	4.2288	4.12993	3.89427	4.26066	4.88757	4.65505	4.65318	4.124	4.01526	4.82555	4.61945	4.232	4.11243	4.76004	4.17892	4.77623	4.25989	4.78856	CLM75_RS01990	4.62717	4.1719	4.53781	4.01284	4.04996	4.87662	3.86796	4.55213	4.44709	4.2426	4.39375	4.5733	4.62481	4.79817	4.53549	4.03559	4.86829	4.20935	4.10548	4.12797
	CLM75_RS01995	4.78233	5.40575	4.96801	4.57724	4.66606	4.91462	5.0821	4.47849	5.46716	4.60981	5.13407	4.9842	5.52393	4.34244	4.66015	4.91632	4.83215	5.45901	4.4829	5.16318	CLM75_RS01995	5.56483	5.35949	5.30439	5.29851	5.41339	5.44057	5.17048	5.36791	5.33036	5.27204	5.40559	5.73278	5.12282	5.40912	5.00364	5.30759	5.24069	5.26142	5.02413	5.4614
	CLM75_RS02000	5.54575	6.72451	6.26721	6.12217	5.67436	5.74833	6.83515	5.92505	6.67525	6.29117	5.97131	6.71377	6.96278	5.76256	5.85994	6.38141	5.41475	6.81132	5.26586	7.07291	CLM75_RS02000	7.32903	7.03071	6.95414	6.967	7.03195	7.41315	6.90759	6.9974	7.04204	7.14042	7.13003	7.05744	7.34877	7.12846	6.35017	6.87792	7.1869	6.96733	6.72629	7.18799
	CLM75_RS02005	5.45392	6.22217	5.83518	5.39853	5.3867	5.27661	6.23026	5.48078	6.27915	5.60155	5.46192	5.94148	6.4355	5.36516	5.3572	6.01867	5.46374	6.49158	5.2734	6.31279	CLM75_RS02005	5.80618	5.48811	5.65161	5.64084	5.32056	5.94085	5.6201	5.6588	5.83725	5.63024	5.42719	5.61591	5.79684	5.82335	5.45616	5.50703	6.01637	5.49991	5.54596	5.62459
	CLM75_RS02010	7.13807	7.70892	7.42137	7.27309	7.03055	7.11399	7.75963	7.19098	7.81619	7.41974	7.06667	7.42946	7.62369	7.10778	7.17321	7.49851	7.19877	7.85048	6.81171	7.59749	CLM75_RS02010	7.72942	7.2442	7.50971	7.49838	7.23779	7.78446	7.29849	7.57965	7.63521	7.58302	7.49413	7.41314	7.57186	7.66599	7.11118	7.36203	7.65433	7.34	7.27631	7.2879
	CLM75_RS02015	4.23007	4.91136	4.69864	4.71145	4.54508	4.73624	4.8221	4.80207	4.83801	5.06749	4.40761	5.06119	5.11621	4.74698	4.82469	5.04762	4.51248	5.03707	4.56512	5.25928	CLM75_RS02015	3.69732	3.79575	3.83921	4.03067	3.58396	3.9657	4.07432	4.07664	3.71179	3.59461	3.7567	3.97364	4.39303	3.58501	3.84822	4.12179	4.03662	3.61647	4.18828	3.80223
	CLM75_RS02020	8.51431	8.42875	8.56106	7.2006	8.87982	9.03651	8.74591	8.58872	7.53996	8.52114	7.50806	9.33545	8.1262	8.80059	9.80674	9.34514	8.77741	8.82545	8.57331	9.24573	CLM75_RS02020	7.41699	8.27948	8.13418	8.39792	8.42248	7.34816	8.69049	7.9497	7.91925	8.36507	8.20092	8.29905	8.0067	7.57768	8.39125	8.58388	7.50503	7.98687	8.30501	8.271
	CLM75_RS02025	7.3048	6.78202	7.61436	7.05044	7.85472	8.2967	7.63372	7.67897	6.33789	8.0185	6.33449	8.3712	6.86675	7.93238	8.72131	8.20709	7.68693	7.38036	7.32693	8.2363	CLM75_RS02025	6.2791	7.35825	7.06518	7.18071	7.03971	5.97601	7.59278	6.81014	6.65285	7.02617	7.00862	7.21118	6.49468	6.45374	7.24882	7.36744	6.29333	6.78751	7.014	6.99618
	CLM75_RS02030	8.08262	7.90797	8.00696	7.73471	8.21047	8.04916	7.70335	7.99662	7.55657	7.81815	7.90531	8.01013	7.73135	8.00134	8.2465	7.96768	7.86209	8.05855	8.11525	7.79624	CLM75_RS02030	6.86867	6.95429	6.87055	7.22664	6.96209	7.0296	7.19275	6.92065	6.92223	7.04136	7.1653	6.88808	7.24231	6.83092	7.35055	7.1785	7.07261	7.04677	7.20453	6.88002
	CLM75_RS02035	8.65675	8.65487	8.7089	8.82991	8.72781	9.10098	8.77609	8.97513	8.49225	9.08207	8.5488	9.05851	8.7872	8.94248	8.85631	8.74933	8.55503	8.86509	9.17742	8.98018	CLM75_RS02035	8.18458	8.32436	8.358	8.51903	8.23092	8.52479	8.43219	8.36432	8.41678	8.08281	8.30544	8.20256	8.32765	8.39793	8.42429	8.38093	8.41609	8.16822	8.39158	8.05954
	CLM75_RS02040	5.95617	6.35568	6.28692	6.20948	6.18707	6.45844	6.42548	6.002	6.34495	6.43874	6.09162	5.81382	6.38765	6.0833	6.27266	6.19284	5.73769	6.49544	6.2359	6.00043	CLM75_RS02040	5.77634	6.03185	5.46341	5.51586	5.56759	5.44514	5.71058	5.40806	5.59535	5.60855	5.29247	5.66661	5.78625	5.73561	5.58623	5.37219	5.64756	5.59812	5.53622	5.39158
	CLM75_RS02045	10.9498	9.96986	10.4461	10.5893	10.9443	10.9516	9.75735	10.4312	9.77484	9.99708	10.488	9.5525	10.0672	10.6248	11.3517	10.4483	10.668	9.86638	10.9885	9.38858	CLM75_RS02045	8.15806	8.88631	8.80348	9.0309	8.83477	8.35975	9.24579	8.62834	8.40157	8.52299	8.70556	8.7555	8.39546	8.47625	9.60909	9.35079	8.37006	8.95398	9.31257	8.67377
	CLM75_RS02050	5.14053	5.14288	4.90882	5.1576	5.36728	5.52153	5.19139	5.27779	5.07442	5.1459	4.90796	4.9294	5.24951	5.46883	5.25954	5.28729	5.21536	5.25529	5.71415	4.77821	CLM75_RS02050	3.90462	4.12417	3.90909	4.06784	4.01439	3.73888	4.05409	3.76935	3.98541	4.30866	4.1503	4.06177	4.09974	4.19667	3.98336	4.21625	3.78203	4.09639	4.24564	4.07923
	CLM75_RS02055	8.46755	7.97404	8.77342	9.13462	8.58483	8.95019	8.90851	9.09842	8.67274	9.72513	8.77046	8.76372	9.26986	8.72463	8.99827	8.39144	8.57607	8.61796	8.73395	8.72669	CLM75_RS02055	7.8287	9.18183	8.39406	9.07789	8.30778	7.58446	9.02758	8.41889	8.49984	8.34707	8.37303	8.56971	8.14065	8.33944	8.8531	8.99404	8.12704	8.6214	9.14536	8.7968
	CLM75_RS02060	8.1131	8.48734	8.16825	8.09393	8.20351	8.59719	8.40322	7.99518	8.48439	7.99994	8.22095	7.86287	8.65127	8.0219	8.33131	7.90624	8.0546	8.57145	8.47664	7.88297	CLM75_RS02060	7.37977	7.67698	7.44406	7.43744	7.45901	7.55341	7.52904	7.59892	7.50826	7.2732	7.42462	7.42112	7.88783	7.43354	7.92549	7.53433	7.762	7.59913	7.5942	7.35897
	CLM75_RS02065	5.26525	5.41774	5.23478	4.87023	5.15827	4.78733	5.38923	5.11084	5.38369	4.8947	5.51751	5.34845	5.10442	4.75455	5.09766	5.49205	5.018	5.57416	4.81692	5.80792	CLM75_RS02065	7.08524	6.13114	6.44838	6.29146	6.37959	6.84225	6.00817	6.77539	6.64648	6.82141	6.83792	6.62299	6.73128	6.71915	5.41234	6.24065	6.8181	6.44567	5.89782	6.43728
	CLM75_RS02070	5.89839	6.31264	6.05083	5.8026	5.70872	6.07816	6.36912	5.92099	6.16676	5.77893	5.70848	6.04062	6.2259	5.97903	5.75192	6.36901	5.75593	6.55352	6.17578	6.16777	CLM75_RS02070	6.53083	6.20756	6.42513	6.06847	6.24155	6.57503	6.04525	6.45631	6.4576	6.5982	6.4251	6.47765	6.44502	6.4455	5.90356	6.14669	6.52392	6.47889	5.9323	6.20521
	CLM75_RS02075	4.38153	4.77999	4.35787	3.87235	4.14297	4.04132	4.69795	4.20566	4.66977	4.08668	4.11753	4.52432	4.7463	4.232	4.18298	4.53565	3.98058	4.67374	4.18786	4.26646	CLM75_RS02075	4.16858	4.08008	3.94853	4.1899	4.03524	3.92702	4.16605	3.79144	3.97837	4.24635	3.95128	4.03034	4.52636	4.29591	3.94602	4.06329	4.03662	4.06417	4.02093	3.69846
	CLM75_RS02080	5.85624	5.93516	5.66675	5.5722	6.04026	5.95367	5.72109	5.7869	5.81201	5.51288	5.82373	5.65996	5.98845	5.6865	5.87473	5.76127	5.8207	5.89112	6.05457	5.6158	CLM75_RS02080	4.67162	4.80238	4.8214	4.90183	4.67658	4.7107	4.74588	4.90526	4.87798	4.71816	4.78744	5.0593	4.91479	4.84133	4.92427	4.95869	4.94738	5.05762	4.96985	4.65149
	CLM75_RS02085	8.68926	8.46172	8.48804	7.99374	8.76224	8.17271	8.03692	8.49649	8.38605	8.03372	8.40101	8.33057	8.19347	8.39067	8.74399	8.56672	8.5852	8.51702	8.1769	8.51251	CLM75_RS02085	6.76802	6.96681	6.88288	7.03428	6.52097	6.90496	6.92599	6.85983	6.79757	6.81574	6.84216	6.92272	7.29558	6.74262	7.31347	7.07065	7.15393	6.93901	7.12822	6.46205
	CLM75_RS02090	7.89241	8.26461	8.01215	7.82737	7.8472	8.31857	8.35826	8.07224	8.07677	7.88961	7.77067	7.96977	8.33014	8.09982	7.90085	8.073	7.9508	8.30981	8.33769	7.8551	CLM75_RS02090	6.83686	7.45039	7.28729	7.16591	7.15105	6.65904	7.28832	7.04043	7.06506	7.03866	7.10133	7.11194	6.89559	7.16636	7.43046	7.10868	7.00325	7.22698	7.38274	7.31403
	CLM75_RS02095	8.96132	8.75731	9.02401	8.92724	8.87613	9.18595	8.90202	9.16708	8.87731	9.23398	8.80074	8.78442	9.00338	9.05339	9.05938	8.85491	8.71661	9.12044	9.17144	8.8292	CLM75_RS02095	8.3516	8.73209	8.39731	8.67216	8.40756	8.25976	8.71842	8.40876	8.4983	8.64023	8.22822	8.59359	8.4735	8.36049	8.70241	8.67949	8.44759	8.61941	8.75167	8.54731
	CLM75_RS02100	5.82698	6.56107	6.11219	6.9502	5.96666	6.75135	6.53199	5.92302	6.58729	6.08116	6.10392	6.08333	7.14013	6.19214	6.21651	6.15811	6.24914	7.10739	6.84121	5.77579	CLM75_RS02100	4.50331	5.21708	5.46261	5.49112	5.33024	5.08615	5.45688	5.2859	5.16353	5.08991	5.0532	4.99969	5.40499	4.93305	6.2825	5.55544	4.9793	5.42972	5.64203	5.27918
	CLM75_RS02105	8.93429	8.1269	8.71403	9.81485	9.0319	9.0303	8.44261	8.79852	8.15933	9.07644	8.79826	8.24159	8.52436	8.74739	9.10929	8.46166	8.91606	8.43179	9.00474	8.24466	CLM75_RS02105	7.59399	7.94178	7.788	8.26018	7.51444	7.72839	7.96062	8.02612	8.04056	7.8011	7.89946	7.68823	7.91605	7.85397	8.39601	8.12972	7.96357	7.83552	8.35033	7.60372
	CLM75_RS02110	8.23416	7.25071	7.83479	8.45985	8.37073	7.71009	7.30401	7.95967	6.74309	7.70824	7.99058	7.32063	6.74035	7.88914	8.25744	7.72815	8.4403	7.09089	7.85907	7.10818	CLM75_RS02110	6.94643	6.75056	7.03828	7.40534	6.61452	7.06763	7.04169	7.32842	7.30511	6.89075	7.07889	6.81849	7.19301	7.00233	7.44892	7.37639	7.45002	6.96215	7.57475	6.66975
	CLM75_RS02115	1.24455	0.120385	1.19807	1.16774	1.90131	0.889592	0.959146	0.783716	0.570161	0.82515	1.26216	0.650332	-0.219757	0.747883	0.631804	1.24026	0.806559	0.490384	0.490215	0.295866	CLM75_RS02115	0.517714	-0.819716	-0.0537416	0.0154603	0.650756	-0.336636	0.0874338	-0.261838	0.00198797	-0.624867	-0.668389	-0.206208	-0.199446	0.600715	0.0940717	-0.247246	0.626585	0.0688786	0.244774	-1.9954
	CLM75_RS02120	7.10827	7.78289	7.43524	7.87194	6.97228	8.09868	8.14865	7.65799	7.99244	8.1405	7.18358	7.54466	8.11677	7.76305	7.25248	7.34962	7.2235	7.60086	8.06179	7.48034	CLM75_RS02120	6.4836	7.82034	7.28684	7.43765	7.20989	6.32531	7.69781	6.90027	6.86423	7.00363	6.82385	6.893	6.88817	6.86886	7.82752	7.42712	6.48938	7.19572	7.46218	7.51983
	CLM75_RS02125	4.75743	4.43403	4.3924	4.40842	4.5537	4.64771	4.9122	4.72966	4.38654	4.43128	3.99537	4.66316	4.72934	4.48462	4.48641	4.85093	4.38574	4.83318	4.13913	4.79113	CLM75_RS02125	3.67485	3.55363	3.7501	3.5299	3.74455	3.64403	3.91038	3.76935	4.04051	3.02475	3.81994	3.69171	3.73119	4.05053	4.25929	3.53299	3.93511	3.93204	3.86858	3.69846
	CLM75_RS02130	4.0656	4.75373	4.53315	4.29038	4.20993	4.60199	4.98276	4.63866	4.51228	4.47696	3.63754	4.93759	5.00642	4.8086	4.29036	5.01117	3.43857	5.10079	4.6209	4.75598	CLM75_RS02130	3.77783	3.86157	3.62965	3.85416	3.50499	3.46363	3.91999	3.49273	3.73076	3.23567	3.63694	3.54931	3.77473	3.82674	3.87826	3.73086	3.20006	3.64398	3.8975	3.62111
	CLM75_RS02140	6.05143	6.47241	6.32436	6.51939	5.90064	6.39972	6.21435	6.75628	6.28087	6.54455	5.60007	7.06952	6.49994	7.09888	6.16266	6.36042	6.22653	6.43377	6.89172	6.59099	CLM75_RS02140	4.87677	4.98786	5.30349	5.80525	4.8514	5.34438	5.59131	5.3497	5.19347	4.66871	4.98585	4.86143	5.3046	4.98995	6.02491	5.75545	5.51479	5.02869	5.84405	4.88685
	CLM75_RS02145	6.00986	5.8354	5.89179	5.77627	5.80715	5.69706	5.58515	6.02109	5.8154	5.76822	5.81292	5.93331	5.96545	6.17005	5.94746	5.77838	5.81027	5.79584	5.88456	5.88466	CLM75_RS02145	5.20712	5.42212	5.40955	5.57857	5.28493	5.57936	5.36602	5.35085	5.3846	5.38011	5.45734	5.35083	5.59306	5.28531	5.73046	5.48852	5.68377	5.34928	5.50073	5.37989
	CLM75_RS02150	4.65172	4.85513	5.0012	5.07009	4.63391	4.69949	5.10775	5.05514	4.88849	5.03789	4.46134	5.14845	5.11098	5.21474	4.57152	5.15988	4.51615	5.27148	5.15892	4.91787	CLM75_RS02150	4.45704	4.66518	4.44351	4.4322	4.34785	4.42792	4.59602	4.53713	4.63559	4.65748	4.52184	4.64767	4.46124	4.36475	4.26688	4.56974	4.6928	4.44186	4.34217	4.43288
	CLM75_RS02155	4.2258	4.50096	4.46773	4.6536	4.14525	4.30536	4.3934	4.38924	4.48697	4.5163	4.08538	4.75315	4.70525	4.84048	4.41841	4.71174	3.97703	4.45985	4.58193	4.58106	CLM75_RS02155	3.90462	3.65964	3.95538	3.81354	3.6317	4.14302	3.47016	4.11353	3.98365	3.78714	3.94813	3.7841	3.81699	3.80312	3.359	3.8665	4.11828	3.72608	4.01269	3.51514
	CLM75_RS02160	5.05777	5.41475	5.42357	5.67581	4.87441	5.10085	5.39663	5.33383	5.35087	5.58196	4.87171	5.67962	5.62829	5.8394	5.14723	5.54055	4.75965	5.59438	5.47008	5.51506	CLM75_RS02160	4.93465	4.99974	4.84003	4.81832	4.48195	5.09102	4.53893	4.73247	4.92632	4.81983	4.67411	4.77638	4.67163	4.75368	4.57883	4.7389	5.14867	4.74472	4.90989	4.48058
	CLM75_RS02165	4.19341	4.47823	4.41944	4.63698	3.89155	4.30046	4.65594	4.35956	4.24275	4.46161	3.7839	4.71172	4.54383	4.76638	3.94661	4.45726	3.54305	4.83318	4.71809	4.67884	CLM75_RS02165	4.35979	3.87225	4.05015	3.89367	3.78733	4.42946	4.13337	3.97339	4.15729	3.94779	4.1227	4.06177	4.53904	4.13179	4.18911	4.1109	4.65073	4.06621	4.02585	3.78206
	CLM75_RS02170	3.88536	3.68037	4.16898	4.4014	3.90509	4.2335	4.26103	4.22115	4.07625	4.54005	3.81519	4.43689	4.30595	4.56069	3.86108	4.44254	3.14171	4.05251	4.2881	3.82888	CLM75_RS02170	4.04137	3.87377	3.79152	4.1312	3.80479	4.19278	3.96403	4.0794	3.99938	3.69134	3.48046	4.28456	3.95585	3.76695	3.96481	4.21335	4.14017	3.8913	4.01434	3.80722
	CLM75_RS02175	5.82838	5.61817	6.00916	6.01138	5.51138	5.7278	5.83048	5.94917	5.8826	6.04727	5.73271	6.02917	6.16853	6.29669	5.78632	5.90029	5.54507	5.82816	6.01123	5.99206	CLM75_RS02175	5.3628	5.37245	5.4228	5.37465	5.1315	5.65756	5.28774	5.43259	5.5192	5.23098	5.42493	5.42067	5.73206	5.52074	5.40204	5.40758	5.53971	5.32058	5.34211	5.07678
	CLM75_RS02180	6.16493	6.34315	6.38391	6.20183	6.13805	6.17547	6.21321	6.28122	6.12171	6.3405	6.05452	6.48367	6.26233	6.7239	6.15641	6.37871	5.74397	6.50039	6.48814	6.25288	CLM75_RS02180	5.60952	5.42471	5.28095	5.09958	5.41339	5.60409	4.89469	5.40806	5.48298	5.53533	5.63196	5.68186	5.19671	5.31066	5.29103	5.21693	5.58988	5.44388	5.21861	5.22978
	CLM75_RS02185	4.07748	4.17887	4.54752	4.65831	4.04857	4.32801	4.46557	4.46182	4.25679	4.86193	4.35606	4.91951	4.2356	4.76531	4.40723	4.6192	3.70409	4.73105	4.60005	4.4984	CLM75_RS02185	3.41698	3.64725	3.45376	3.50779	3.14267	3.84411	3.71438	3.68654	3.54795	2.69222	3.40914	3.48701	2.41855	3.31131	3.17761	3.84414	3.92	3.43624	3.57158	3.76161
	CLM75_RS02190	3.95915	3.7748	4.1822	4.24723	4.15887	4.02161	3.78892	4.25809	3.76847	4.07999	3.89741	4.00342	3.59224	4.6353	3.88547	4.13713	3.83725	4.03137	4.37307	3.77527	CLM75_RS02190	3.24899	3.41436	3.08874	3.20034	2.90435	3.54534	3.45701	3.32113	3.37653	3.28026	3.47174	3.53258	3.61623	3.4032	3.33031	3.58562	3.29678	3.35533	3.40784	3.06753
	CLM75_RS02195	5.64251	5.04032	5.66581	5.88535	5.60557	5.65993	5.40333	5.7802	5.10302	5.9589	5.43598	5.71436	5.51901	6.28851	5.54684	5.59416	5.4688	5.3283	5.99535	5.01467	CLM75_RS02195	4.38571	4.8151	4.40567	4.58029	4.08181	4.1598	4.64128	4.24986	4.23316	4.49989	4.36105	4.44809	4.379	4.04718	4.72927	4.56063	4.50989	4.37119	4.51427	4.52676
	CLM75_RS02200	5.15854	5.10109	5.48458	5.58464	5.20169	5.36921	4.91782	5.31436	4.90706	5.36392	5.03477	5.10983	5.40931	5.84499	5.35575	5.38524	4.98039	5.56473	5.51453	4.76779	CLM75_RS02200	3.69732	3.80215	3.55344	3.75575	3.84922	3.70879	3.85131	3.75558	3.56684	3.68029	3.67164	3.50998	4.1502	3.5988	3.42833	3.96307	3.86323	3.92084	3.73474	3.26207
	CLM75_RS02205	4.35444	4.30822	4.59967	4.91721	4.33117	4.60729	4.10051	4.63371	4.28448	4.93108	4.31725	4.4392	4.63775	5.00382	4.51664	4.49628	4.2019	4.69021	4.8336	4.42736	CLM75_RS02205	3.13133	3.4797	3.10526	2.97484	3.22278	2.66112	3.24391	2.99484	3.24196	3.25814	3.1979	3.09735	3.03463	3.16456	2.81304	3.23077	3.24923	2.97691	3.28187	3.18737
	CLM75_RS02210	5.50233	5.68967	5.79703	5.97311	5.64401	5.94689	5.62408	6.03493	5.89613	6.18635	5.38754	5.7267	5.72132	6.37428	5.64828	5.93699	5.48825	6.03991	6.33613	5.20818	CLM75_RS02210	3.95344	4.50179	3.87336	4.2213	4.1517	3.73888	4.37153	3.8686	4.00632	4.26125	3.8268	4.27789	4.33605	3.84613	3.82783	4.12334	4.14883	4.32774	4.16021	4.12397
	CLM75_RS02215	4.63894	4.61475	4.6557	4.54069	4.61427	4.78849	4.64015	4.84126	4.6387	4.54896	4.21929	4.5024	4.80901	4.9158	4.71333	4.79986	4.33814	4.85139	4.93223	4.28667	CLM75_RS02215	4.01351	3.45351	3.4698	3.51097	3.77321	4.09149	3.73268	3.59095	3.6467	3.50353	3.6868	3.56035	3.17122	3.7791	2.97008	3.83849	3.93009	3.61647	3.57606	3.40737
	CLM75_RS02220	3.04771	3.29972	3.29914	3.86828	3.02281	3.77786	3.54426	3.71802	3.51666	3.8673	2.96245	3.38089	3.82086	4.26875	3.35882	3.4439	3.29206	3.5941	3.90662	3.09314	CLM75_RS02220	2.55342	2.28943	2.39227	2.51185	2.33133	2.33983	2.34589	2.44964	2.34121	2.13536	2.43495	2.55081	0.752409	2.63264	2.51459	2.4688	2.36585	2.12257	2.56504	1.95658
	CLM75_RS02225	4.01953	4.52445	4.58183	4.93383	3.94494	5.01772	4.61383	4.70154	4.68172	4.69908	4.13748	4.55445	4.87375	5.26563	4.12273	4.47906	4.18509	4.60079	4.95469	3.92109	CLM75_RS02225	3.05882	3.21295	2.9355	3.00672	2.949	3.09244	3.24391	3.07737	2.88731	3.07624	2.96284	2.98709	2.99836	3.52371	4.00167	3.11099	2.94547	2.63694	3.27913	2.69943
	CLM75_RS02230	4.753	5.09139	4.66891	5.12221	4.75394	5.03846	4.96566	4.83408	5.08683	4.95625	4.4587	5.07015	4.9268	5.34379	4.86203	4.74931	4.51125	5.15065	5.18716	4.65218	CLM75_RS02230	3.76574	4.04813	3.94853	3.80061	4.11017	4.23385	3.70329	3.97933	3.99241	3.84765	3.97617	4.23373	4.4745	4.10306	3.95544	3.76301	4.07348	4.17204	3.89392	3.94056
	CLM75_RS02235	3.2628	4.20402	3.74266	3.84779	3.16908	4.20057	4.63333	3.87173	4.35238	4.18033	3.22726	4.03735	4.60091	4.441	3.50499	4.06206	2.90457	4.75151	4.46819	3.59548	CLM75_RS02235	3.11712	2.67489	2.67278	2.56788	2.43362	2.80077	2.34589	2.59585	2.99933	2.64753	2.50504	2.67794	2.41855	2.90829	3.28617	2.60805	2.56021	2.69596	2.51925	2.51625
	CLM75_RS02240	9.35889	9.73791	9.49439	9.68904	9.22663	9.50033	9.54082	9.58244	9.52271	9.6853	9.42711	9.75984	9.53889	9.5088	9.3035	9.56302	9.66819	9.59838	9.31892	9.86883	CLM75_RS02240	7.93263	8.27891	8.29661	8.60587	8.14683	8.29193	8.5386	8.33866	8.29142	8.25256	8.22091	8.12332	8.243	7.99746	8.64203	8.59718	8.17924	8.19672	8.65541	8.27168
	CLM75_RS02245	6.64029	6.51156	6.86487	5.9073	6.92723	7.73799	7.04948	6.73139	6.00651	7.22371	5.37569	7.69137	6.55298	6.8606	7.71524	7.64073	6.55038	7.45171	7.17912	7.72364	CLM75_RS02245	4.33748	4.77662	4.51481	5.05562	4.45346	4.10118	5.07761	4.47549	4.68506	4.72892	4.52816	4.84346	4.24611	4.36475	5.31319	5.0273	4.28866	4.6877	5.20059	4.18284
	CLM75_RS02250	4.97887	5.03644	4.79298	5.06743	4.90032	5.37543	4.78258	5.13674	4.95768	4.52863	5.13407	4.74197	5.03293	5.21552	5.30091	4.65795	5.38091	4.83492	5.13841	4.67466	CLM75_RS02250	3.91835	4.47299	4.58421	4.06352	4.64591	4.0501	4.53685	4.18073	4.01838	3.7768	4.23007	4.06565	4.18288	4.06715	4.74566	4.44773	4.28866	4.32944	4.24705	4.68445
	CLM75_RS02255	5.46029	5.24471	5.15793	5.38437	5.42007	5.85966	5.10939	5.78839	5.06704	5.21824	5.05763	5.29462	5.00219	5.69046	5.31743	5.48703	5.68756	4.98932	5.74704	5.10228	CLM75_RS02255	5.15125	5.01014	5.24692	4.96463	5.13978	5.0556	5.1651	5.10911	4.87609	5.13714	5.02961	5.35242	5.37701	4.95465	5.40204	5.04129	5.13783	5.06374	4.96729	5.21294
	CLM75_RS02260	6.80729	6.86452	6.6256	6.59141	6.62878	7.01529	6.72959	6.69778	6.73236	6.44374	6.56057	6.66823	6.72031	6.75823	6.83249	6.89573	6.76233	6.78156	6.81914	6.69638	CLM75_RS02260	6.24954	6.20243	6.24397	6.25827	6.33283	6.2376	6.23242	6.2619	6.31927	5.92868	6.29204	6.0822	6.29611	6.08565	6.28063	6.26331	6.38966	6.17428	6.09643	6.1164
	CLM75_RS02265	8.38521	8.45969	8.53515	8.35567	8.27261	8.74995	8.21886	8.55277	8.45603	8.32321	8.30876	8.29101	8.78628	8.47525	8.56876	8.26126	8.19456	8.62188	8.57979	8.42932	CLM75_RS02265	7.40144	7.75215	7.66994	7.58842	7.63865	7.66664	7.59278	7.6645	7.66961	7.39561	7.61172	7.59431	7.83353	7.60924	7.8288	7.618	7.82078	7.75439	7.74666	7.62404
	CLM75_RS02270	7.88836	8.28227	8.15792	7.97379	7.89105	8.47514	8.26417	8.12553	8.15913	8.06383	7.5725	8.11568	8.46269	8.07647	8.08505	8.20796	7.56431	8.60147	8.51573	8.08138	CLM75_RS02270	6.12722	6.47547	6.25789	6.46378	6.16318	6.27058	6.49881	6.27251	6.35333	6.03658	6.25311	6.15777	6.26592	6.33866	6.91741	6.51853	6.47136	6.62307	6.61014	6.37048
	CLM75_RS02275	4.48864	5.47741	5.09922	5.42713	4.55026	4.35188	5.54392	5.12031	5.84923	5.87253	5.75547	6.09143	5.56945	5.03439	5.07222	4.87744	4.57835	5.37819	4.65451	6.37718	CLM75_RS02275	5.81501	5.22306	5.51609	5.80266	4.49921	5.9995	5.74525	4.74035	4.96511	4.43235	4.8876	5.39159	5.61717	5.84472	5.84645	6.06039	5.85766	5.46794	5.91649	5.13955
	CLM75_RS02280	4.03911	4.66795	4.51446	4.38443	3.98882	6.09759	4.88374	5.24461	4.67277	4.51465	3.17355	4.60057	5.259	5.07732	4.23134	4.5273	4.56187	4.96405	5.81388	4.23087	CLM75_RS02280	4.24464	5.14465	5.01087	4.91029	4.55598	4.26002	4.69826	5.20592	4.93089	4.51551	4.76619	4.83212	4.71697	4.52974	6.14716	4.94386	4.89942	4.8816	5.30008	4.70869
	CLM75_RS02285	3.82743	4.47249	4.11763	3.97983	3.6685	5.72658	4.52451	4.96075	4.37002	4.21228	2.54135	4.35609	4.78786	4.69953	3.99783	4.41263	3.92273	4.49336	5.43518	4.07057	CLM75_RS02285	3.97199	4.90703	4.68793	4.65117	4.35971	4.23736	4.34084	4.89038	4.7629	4.48409	4.35157	4.31096	4.379	4.48344	5.5953	4.57315	4.8604	4.58499	4.97494	4.40018
	CLM75_RS02290	6.09825	5.93642	6.23142	5.51162	5.71641	5.99115	5.6564	6.1596	5.83258	6.02655	6.32546	6.6384	5.75943	5.94016	5.91329	5.90513	6.16002	5.55999	5.9683	6.4596	CLM75_RS02290	6.41699	5.71618	6.52059	6.53891	6.01281	6.95708	5.99611	6.91447	6.7888	6.23744	6.45252	6.13024	6.82486	6.70435	6.67225	6.52235	6.67099	6.18368	6.57784	5.86163
	CLM75_RS02295	4.82525	5.36668	5.12819	5.24403	4.68658	5.15613	5.43244	5.20287	5.28044	5.19315	4.74204	5.30352	5.33947	5.21865	4.92611	5.42547	5.03003	5.35528	4.91906	5.30233	CLM75_RS02295	5.42471	4.8363	5.19191	5.17367	5.00127	5.65494	4.99361	5.21789	5.25446	5.23287	5.27753	4.92476	5.18868	5.40521	5.26094	5.07369	5.22234	4.9614	5.06455	4.90094
	CLM75_RS02300	6.29377	6.42862	6.24723	6.44494	6.25417	5.49604	5.59044	5.83444	6.41863	5.71633	6.91439	5.27666	6.25997	5.59841	6.45985	5.83358	6.4222	5.94379	4.79481	6.0082	CLM75_RS02300	5.82014	5.52581	6.1585	5.39717	5.88076	6.47654	5.39043	6.44403	6.14206	6.16894	6.3604	5.98207	6.55835	6.2977	5.52741	5.6128	6.37497	6.03056	5.58871	5.67193
	CLM75_RS02305	9.3194	10.0123	9.42798	11.1196	9.36532	10.1375	10.2581	10.3117	10.507	10.5868	9.70267	9.22225	10.3065	10.4197	9.44405	9.50012	9.52523	10.3097	9.31189	9.21862	CLM75_RS02305	9.54108	9.56487	9.53594	9.75082	9.31824	9.43128	9.56023	9.67654	9.70062	9.59479	9.68509	9.44228	9.41568	9.6528	9.52534	9.62464	9.50416	9.45565	9.64927	9.28605
	CLM75_RS02310	7.80344	7.79467	7.63397	9.18224	8.27208	9.31792	7.65084	9.1148	7.85082	8.53256	7.12964	7.12185	7.79409	9.15239	8.30359	7.96318	8.35171	7.91425	8.80936	6.67424	CLM75_RS02310	6.31431	6.84386	6.93406	7.29624	6.41242	6.35191	7.29326	6.72684	6.86136	6.39863	6.45142	6.67663	7.15645	7.03057	7.80879	7.31402	6.83161	6.97872	7.47258	6.63644
	CLM75_RS02315	5.0102	5.05191	4.93247	4.86208	4.93372	4.94842	4.72707	5.05019	4.86118	4.81505	4.97137	5.08055	4.79766	5.07991	5.04	5.16258	4.77608	4.89551	4.78692	5.10436	CLM75_RS02315	4.57613	4.30065	4.37534	4.26338	4.47978	4.9254	4.14708	4.59817	4.65448	4.52171	4.63362	4.5651	4.52636	4.31552	3.99254	4.32658	4.83646	4.27241	4.59263	4.39022
	CLM75_RS02320	3.63501	3.46375	3.53582	3.43762	3.74574	3.19515	3.25243	3.50676	3.48121	3.5516	3.999	3.6557	3.4126	3.41271	3.41573	3.67307	3.29776	3.6307	3.56312	3.80105	CLM75_RS02320	3.90186	2.99842	3.24599	3.46581	3.02247	3.22942	3.149	3.41606	3.26238	3.30923	3.37679	3.04327	3.49131	3.34441	2.68291	3.2076	3.20838	3.14037	3.07588	2.42816
	CLM75_RS02325	5.5937	5.48883	5.83099	5.78654	5.49984	5.64776	5.84088	5.80757	5.74953	6.11017	6.01239	5.804	6.01108	5.74691	5.67941	5.4322	5.38225	5.69238	5.65111	6.06992	CLM75_RS02325	5.81207	5.62842	5.87878	6.11466	5.94436	6.09708	5.93183	5.96572	5.84113	6.1115	5.92187	5.89969	5.61717	5.77964	5.31319	6.02686	5.98889	5.81936	5.75992	5.79904
	CLM75_RS02330	5.78048	6.3619	6.02098	6.49884	5.83145	6.92533	6.77057	6.26797	6.40068	6.55704	5.6197	5.98402	6.88831	6.35482	6.19513	6.07703	5.90387	6.56801	6.68343	5.83375	CLM75_RS02330	4.45516	5.59747	5.04016	5.3509	4.81396	4.41245	5.25773	4.90371	4.89116	4.64901	4.92962	4.77164	4.9998	4.9276	5.76839	5.278	4.9299	5.1459	5.56806	5.14942
	CLM75_RS02335	9.1609	8.65627	8.75949	8.72666	8.77326	8.58884	8.58682	8.91645	8.63099	8.97957	8.9016	9.09915	8.52939	8.90162	8.56161	8.64701	9.0266	8.54706	8.67775	9.26716	CLM75_RS02335	9.62163	8.81066	9.62818	9.94968	8.90343	9.9348	9.48929	9.82255	9.65193	9.36311	9.54953	9.24689	9.66488	9.55219	9.57166	9.81315	9.83652	9.23224	9.64974	9.12227
	CLM75_RS02340	8.23998	8.0571	8.03509	8.55827	8.08648	8.15755	8.12088	8.41297	8.49029	8.50661	8.10166	8.17404	8.19949	8.33705	8.2736	7.98302	8.35308	8.43719	8.0675	8.52658	CLM75_RS02340	6.89841	6.80176	6.90987	7.07405	6.42546	7.29262	6.72359	6.82401	6.7665	6.27832	6.62622	6.65361	6.98402	7.11493	6.90531	7.02788	7.05082	6.70502	7.14264	6.67044
	CLM75_RS02345	9.50149	9.01989	9.67872	9.2081	9.57869	9.05632	9.25295	9.36176	9.23844	9.25321	9.796	9.09686	9.66586	9.21514	9.77888	9.23347	9.30793	9.09506	9.00063	9.34561	CLM75_RS02345	9.0026	8.94983	9.19523	9.55281	9.03869	9.39587	9.11161	9.61042	9.66996	9.17251	9.60631	9.03228	9.2351	9.31811	9.11941	9.3564	9.66803	9.08922	9.52912	8.98277
	CLM75_RS02350	10.2476	10.3667	10.502	10.5989	10.1627	10.7204	10.8257	10.796	10.7601	10.6245	10.0075	10.3507	11.1204	10.7281	10.491	10.3234	10.488	10.5647	10.5154	10.3046	CLM75_RS02350	9.67653	9.83499	10.0393	10.3312	9.92131	10.0126	9.97288	10.3499	10.2952	9.89493	10.3031	9.68139	9.85053	10.1058	10.1285	10.1143	10.1215	9.78064	10.2113	9.86518
	CLM75_RS02355	7.90046	7.86382	7.96399	7.8992	7.92166	8.13869	7.86053	7.91207	7.67607	7.93826	7.97266	7.7329	8.04386	7.92496	7.98694	7.88461	7.83797	8.16689	8.0153	7.92299	CLM75_RS02355	7.38002	7.36584	7.29699	7.47293	7.44181	7.3508	7.63814	7.34546	7.34481	7.40906	7.39234	7.18422	7.327	7.29788	7.36477	7.43914	7.46397	7.42848	7.40762	7.39634
	CLM75_RS02360	5.43834	5.57758	5.62574	6.03151	5.48999	6.16922	5.88557	5.55861	5.87352	6.09863	5.58381	5.09819	6.27408	5.66138	5.65598	5.41345	5.3442	5.9082	6.03473	5.17407	CLM75_RS02360	4.89633	5.49947	4.76663	5.13607	4.95355	4.7308	5.16645	4.95127	4.78726	4.97932	4.93756	4.83894	4.08252	5.1389	5.30952	5.00815	4.8257	5.06781	5.10463	5.23536
	CLM75_RS02365	6.24086	5.95135	6.2771	6.57685	6.26523	6.54142	5.80137	6.29122	6.0701	6.52539	5.95221	5.69806	6.50144	6.35054	6.3934	5.93962	5.94804	6.13853	6.41456	5.7522	CLM75_RS02365	5.84047	5.98936	5.5557	5.89133	5.59393	5.73424	5.74164	5.85026	5.86994	5.84211	5.91626	5.72422	5.75398	5.77459	5.70554	5.79922	5.93857	5.79441	5.95913	5.48655
	CLM75_RS02370	7.37628	6.44922	7.17856	7.33107	7.36346	7.49054	6.63687	7.21577	6.49488	7.24417	7.18976	6.86099	7.02771	7.27217	7.64125	7.1352	7.17535	6.95195	7.29925	6.82914	CLM75_RS02370	5.49693	6.08923	5.67046	5.8956	5.75617	5.55772	6.13053	5.68717	5.61477	5.51526	5.68859	5.65507	5.635	5.56237	6.00463	5.85761	5.62755	5.89287	5.98547	6.00119
	CLM75_RS02375	6.13283	5.29565	6.04433	5.9783	6.27464	6.20941	5.47375	6.15211	5.11408	6.0447	6.14349	5.82534	5.59964	6.18775	6.28646	5.99767	6.19519	5.46183	6.18681	5.59016	CLM75_RS02375	4.97462	5.26594	5.12867	5.15346	4.94412	4.98623	5.22061	5.09004	5.16741	4.94511	5.06485	5.07863	5.23617	4.92578	5.11297	5.1928	4.94986	5.06068	5.13683	5.22606
	CLM75_RS02380	5.80642	5.48826	5.9905	6.02923	5.89319	6.13523	5.60678	5.99494	5.20225	5.84682	5.75063	5.70095	5.4336	5.88401	5.89439	5.94066	5.79725	5.70149	6.1256	5.51739	CLM75_RS02380	4.50149	5.06705	4.6448	5.11219	4.60065	4.47932	5.09893	4.7351	4.55392	4.6715	4.64531	4.54022	4.79304	4.70353	5.55557	4.87934	4.5724	4.88391	5.01096	4.83151
	CLM75_RS02385	6.90389	6.16461	6.97034	6.9514	6.97357	6.77155	6.42219	6.62852	6.13995	6.91256	6.84458	6.49924	6.22771	6.78517	6.86274	6.71916	6.48444	6.5241	6.85384	6.36297	CLM75_RS02385	5.07608	5.55026	5.09392	5.48466	5.1106	5.07243	5.53403	5.32312	5.11623	5.37327	5.24077	5.18413	5.24394	5.24935	5.60432	5.42965	5.3499	5.35927	5.50308	5.07885
	CLM75_RS02390	7.05005	6.72306	7.17987	7.16606	7.16093	7.22481	6.83068	7.1456	6.61617	7.10451	7.15981	7.03405	6.64586	7.25644	7.24876	7.03743	7.01527	6.95616	7.30616	6.70323	CLM75_RS02390	5.76499	6.10614	5.93184	6.20871	5.90928	5.8599	6.09561	6.07816	6.02441	5.88725	5.96836	5.75338	6.07886	5.8155	6.24649	6.15466	6.09692	5.98126	6.20816	6.01853
	CLM75_RS02400	2.02112	2.46241	2.24624	1.18091	2.09323	2.01516	2.03571	1.61297	1.93083	1.81297	1.92901	2.2929	1.94097	2.10626	2.26616	2.40166	2.18913	2.66343	2.25818	2.07525	CLM75_RS02400	1.28329	1.22755	0.764046	1.17984	1.09862	0.375185	0.847763	1.07902	0.728179	1.21653	0.981992	0.126596	-0.199446	1.16743	1.67302	0.617625	1.87492	0.943038	0.971872	1.25142
	CLM75_RS02405	6.0024	5.47052	5.91888	6.01276	6.01739	6.20854	5.54876	6.03868	5.48304	6.03551	5.66563	5.68742	5.70145	5.97394	6.08365	5.71363	5.94077	5.58612	6.06167	5.7235	CLM75_RS02405	5.4608	5.58222	5.37761	5.53863	5.23429	5.58282	5.45026	5.52828	5.56631	5.48065	5.29495	5.4085	5.22052	5.18074	5.76034	5.5094	5.7191	5.35262	5.70933	5.38324
	CLM75_RS02410	6.11045	5.78721	6.1348	6.12046	6.33087	6.55314	5.72109	6.13177	5.85781	6.12865	5.92521	5.70384	5.88193	5.99511	6.34294	6.00921	5.74866	5.95826	6.48042	5.65166	CLM75_RS02410	4.9306	5.23316	4.95728	4.93061	4.72506	5.15005	4.89469	4.96105	5.14951	4.88383	4.90553	4.91189	4.97202	4.93305	5.40892	5.1287	5.28262	4.9068	5.24628	4.87738
	CLM75_RS02415	5.70589	5.57115	5.32095	5.49656	5.41441	5.83446	5.50646	5.95712	5.55137	5.08597	5.25766	5.6649	5.63832	5.86163	5.53725	5.89597	5.69352	5.51501	5.5429	5.72485	CLM75_RS02415	3.20486	3.63655	3.62106	3.76909	3.36137	3.80435	3.64265	3.75558	3.58085	3.71318	3.60936	3.49279	4.2615	3.77101	3.44181	3.72475	3.89962	3.47352	3.86309	3.16419
	CLM75_RS02420	8.16581	8.04768	8.17982	8.45207	8.26973	8.82848	8.03616	8.42209	8.17671	8.45913	7.9805	7.59834	8.42591	8.45013	8.40905	7.98162	8.24355	8.02772	8.71658	7.26434	CLM75_RS02420	6.80802	7.91232	7.21825	7.46373	7.44321	6.46159	7.75107	7.03421	7.07396	7.12268	7.1154	7.21861	6.95593	7.10087	7.76323	7.43353	6.65967	7.32903	7.47768	7.77196
	CLM75_RS02425	6.85743	5.85538	6.514	6.27924	6.86212	6.66346	5.80643	6.67144	5.70961	6.18167	6.50601	5.96731	6.27991	6.67682	6.73607	6.54403	6.45445	6.49572	6.98542	5.75087	CLM75_RS02425	5.12307	5.71956	5.24039	5.65097	5.45821	4.7258	5.64447	5.29068	5.20256	5.22149	5.33639	5.44172	5.82818	5.21097	5.72771	5.53289	4.9962	5.42497	5.56806	5.43259
	CLM75_RS02430	8.52194	7.56317	8.12459	8.21347	8.60394	8.32983	7.52138	8.28195	7.31264	8.14984	8.28316	7.92598	7.79836	8.45354	8.40581	8.15148	8.33587	7.64453	8.65284	7.46147	CLM75_RS02430	6.26252	6.89396	6.45161	6.68469	6.57895	6.14468	7.00113	6.39048	6.32379	6.53903	6.44697	6.67916	6.42124	6.49487	7.00058	6.88912	6.48938	6.78628	6.88455	6.68748
	CLM75_RS02435	8.57906	7.6963	8.16326	8.2283	8.58367	8.51762	7.85724	8.31209	7.60433	8.21971	8.30711	7.9817	7.69729	8.35149	8.39205	8.20556	8.44889	7.98163	8.49984	7.83559	CLM75_RS02435	7.62989	7.51013	7.62411	7.4412	7.30436	7.70842	7.39126	7.51754	7.55853	7.46445	7.46227	7.55585	7.45629	7.4743	7.33529	7.33355	7.4902	7.41078	7.44591	7.13183
	CLM75_RS02440	6.74197	6.3914	6.86569	7.18925	6.77414	7.28309	6.74681	7.07521	6.55721	7.18047	6.70455	6.57785	6.6714	7.2591	6.89287	6.7892	6.78381	6.64955	7.21801	6.41063	CLM75_RS02440	6.51195	6.67477	6.67243	6.62835	6.30304	6.86175	6.45814	6.75067	6.81866	6.54514	6.59291	6.61904	6.68069	6.70647	6.75149	6.68351	6.83295	6.56453	6.70574	6.26365
	CLM75_RS02445	7.40722	7.78822	7.68801	7.79496	7.46357	8.17995	7.84831	7.80123	8.14234	7.92845	7.16184	7.46417	8.35205	7.81885	7.75562	7.49155	7.21109	8.16056	7.98231	7.41047	CLM75_RS02445	5.8047	6.48495	6.06922	6.14158	5.76334	5.93383	6.31914	5.8945	5.94541	5.83838	5.86387	6.15048	6.19157	6.05098	6.57012	6.29113	6.21506	6.1457	6.36782	6.11237
	CLM75_RS02450	8.7462	8.83177	8.68566	8.70083	8.75525	9.17768	8.74683	8.69594	8.86365	8.68505	8.49217	8.18973	8.94212	8.85605	9.00391	8.5902	8.62839	8.75317	9.08048	8.05725	CLM75_RS02450	6.95278	7.7351	7.43653	7.51431	7.28552	6.91268	7.72731	7.16898	7.22152	7.21026	7.17306	7.26955	7.44959	7.20818	7.87299	7.69604	7.26219	7.60701	7.73794	7.46554
	CLM75_RS02455	8.09436	7.93712	7.94821	7.98356	8.14026	8.5119	8.09485	7.98776	7.86407	8.13962	7.65119	7.60479	8.07625	8.20649	8.17722	8.05436	8.00352	8.06878	8.83492	7.41486	CLM75_RS02455	6.17145	7.25065	6.60215	7.01425	6.59358	5.78378	7.17914	6.33342	6.38061	6.51514	6.51702	6.8023	6.47831	6.42952	7.37359	7.07246	6.37589	6.86496	7.10438	7.01195
	CLM75_RS02460	7.43126	7.1068	7.32129	7.13532	7.53473	7.5221	6.73756	7.34283	6.89561	7.1041	7.11651	6.77584	7.16021	7.334	7.50283	7.12854	7.31733	7.13985	7.71153	6.37632	CLM75_RS02460	6.14133	6.44231	6.34914	6.2611	6.00754	6.27401	6.273	6.31477	6.24167	6.14604	6.19532	6.37193	6.14671	6.32421	6.63461	6.47916	6.4653	6.35327	6.51972	6.06099
	CLM75_RS02465	5.64969	5.71808	5.7719	5.90433	5.57795	5.79784	5.93031	5.8039	5.71107	6.0792	5.82732	5.90769	6.00264	5.92008	5.60244	5.74457	5.47824	5.95305	5.72037	5.84989	CLM75_RS02465	6.3018	6.14064	6.16885	6.07278	5.99086	6.51436	6.06127	6.13375	6.09891	6.14704	6.00813	5.95722	6.21941	6.33729	6.25032	6.04331	6.19846	6.07923	6.2564	5.82883
	CLM75_RS02470	6.62174	6.06287	6.11977	6.0674	6.44598	6.24597	5.68746	6.28702	5.96983	6.19024	6.32944	5.90101	5.97843	6.13398	6.50874	6.04181	6.31842	6.06279	6.37347	5.92566	CLM75_RS02470	5.70051	5.66311	5.76187	5.74307	5.69289	5.97548	5.72893	5.91128	5.85561	5.75922	5.87052	5.53004	5.92796	5.86672	5.54625	5.58889	5.85236	5.67547	5.7396	5.40648
	CLM75_RS02475	6.36192	6.40441	6.4613	6.45277	6.6099	6.82228	6.67473	6.56404	6.56226	6.68081	6.21913	6.1291	6.53844	6.56397	6.47399	6.38257	6.27574	6.63661	6.90726	5.95466	CLM75_RS02475	5.14192	5.8021	5.04123	5.37378	5.24328	4.64999	5.42348	5.0462	5.17127	5.46786	5.23046	4.92476	5.34848	5.25951	5.40548	5.14175	5.00338	5.31546	5.52526	5.19207
	CLM75_RS02480	3.88806	4.2396	3.97607	3.39023	4.12458	4.00364	4.83008	3.66722	4.06831	3.43763	3.58283	4.00654	4.00694	3.69742	4.08813	4.16968	3.58561	4.50436	3.82939	4.03408	CLM75_RS02480	3.11235	3.87984	3.70203	3.409	3.90856	3.3051	3.56716	3.63672	3.73495	3.68582	3.58124	4.00227	3.35454	3.71726	3.41473	3.67493	3.87372	3.96076	3.54212	3.936
	CLM75_RS02485	4.12406	4.24095	4.49128	4.17669	4.1746	4.21972	4.13633	4.21895	4.07286	4.42337	4.10577	4.39229	3.94362	4.21326	4.09337	4.42167	3.69548	4.25365	4.28996	4.272	CLM75_RS02485	4.13605	3.89189	3.7422	3.86165	3.95308	4.23561	3.67329	4.05151	3.90789	4.20454	3.68302	4.00227	3.66332	4.1127	3.75414	3.88305	4.17875	3.75412	3.70641	2.63343
	CLM75_RS02490	6.23981	6.70016	6.44165	6.40026	6.21287	6.78331	6.68576	6.3929	6.47935	6.55644	6.08864	6.49481	6.69038	6.46813	6.28569	6.53747	5.89779	6.90831	6.76062	6.46968	CLM75_RS02490	5.30963	5.59333	5.33797	5.42608	5.37534	5.28615	5.47873	5.20275	5.25883	5.21958	5.23691	5.35083	5.19671	5.46914	5.53686	5.51236	5.44265	5.5654	5.44855	5.45823
	CLM75_RS02495	7.77618	8.8566	8.49626	8.33586	7.78909	8.22633	8.81604	8.66655	8.63123	8.78661	7.92636	9.03303	8.5829	8.54597	7.9653	8.66147	7.80832	8.76288	8.20799	9.10707	CLM75_RS02495	8.83577	8.61678	8.88967	8.99758	8.50596	9.16077	8.65195	8.93486	9.02095	8.77015	8.93106	8.90756	9.12218	8.83475	8.76304	8.94173	9.08194	8.65627	8.86676	8.33296
	CLM75_RS02500	4.2533	4.51666	4.4569	4.60925	4.06071	4.47149	4.43713	4.58836	4.42614	4.57059	4.50677	4.7401	4.66298	4.21483	4.41423	4.72031	4.36553	4.7348	4.10782	4.71454	CLM75_RS02500	5.04764	4.63771	4.92391	4.74326	5.04893	5.44286	4.4708	5.05325	5.19423	4.7316	5.13007	4.85696	5.36282	5.01929	4.5292	4.67064	5.1637	4.68505	4.53167	4.70869
	CLM75_RS02505	5.51462	6.24153	5.88534	5.30543	5.44808	5.60734	6.18667	5.72849	6.1726	5.25285	5.69115	6.06923	6.24811	5.54447	5.85326	5.90244	5.4795	6.34813	5.31329	6.09045	CLM75_RS02505	5.46174	5.52243	5.38101	5.08151	5.43821	5.68422	5.069	5.37243	5.578	5.46142	5.44513	5.37605	5.82818	5.43369	5.32778	5.11086	5.7278	5.53339	5.26444	5.29528
	CLM75_RS02510	7.04704	7.33473	7.35026	7.23237	7.09662	7.30751	7.67277	7.5055	7.60619	7.27975	7.02691	7.71395	7.89434	7.42653	7.50414	7.41066	7.14583	7.72972	6.97476	7.90542	CLM75_RS02510	6.69733	7.07201	6.66339	6.82446	6.50291	6.97851	6.53105	6.66858	6.76854	6.35761	6.40462	6.8288	7.3215	6.80142	6.91741	6.63004	7.06405	6.78721	6.74282	6.53842
	CLM75_RS02515	7.74839	7.52764	7.49842	7.27635	7.55311	7.17727	7.35983	7.38248	7.50466	7.27853	7.78943	7.54359	7.06639	7.23377	7.49112	7.48024	7.8097	7.34178	7.11836	7.83621	CLM75_RS02515	7.29392	6.95321	7.18828	6.89885	7.13596	7.33324	6.83576	7.30099	7.33434	7.31219	7.2246	7.20063	7.29372	7.29717	7.06294	6.9117	7.4631	7.11937	7.02018	7.04776
	CLM75_RS02520	7.16867	7.00433	6.95772	6.81292	7.04865	6.71561	7.09301	6.84536	6.9511	6.94451	7.20323	7.11609	6.98153	6.76843	7.05167	7.07395	6.96667	7.0764	6.46156	7.59712	CLM75_RS02520	7.69833	6.74081	7.48309	7.06975	7.01104	8.16808	6.8576	7.35333	7.33675	7.37948	7.38364	7.23851	7.42418	7.40865	6.96369	7.03839	7.48678	7.10262	6.95482	6.86752
	CLM75_RS02525	7.09751	7.29934	7.12857	7.32442	7.00282	7.23512	7.30205	6.89035	7.33538	7.40644	7.02825	7.26019	7.26487	6.90821	7.06462	7.14819	7.07374	7.31673	7.19187	7.28229	CLM75_RS02525	6.78386	6.54175	6.502	6.63347	6.55696	6.82541	6.5513	6.69564	6.60967	6.72256	6.78256	6.63218	6.64887	6.62742	6.44019	6.5247	6.80514	6.34575	6.44607	6.57184
	CLM75_RS02530	5.44661	5.86286	5.62477	5.77736	5.3033	6.34803	6.23252	5.67003	5.87059	5.82998	5.20035	5.752	6.13478	5.74691	5.39661	5.87967	5.33314	6.26874	6.26032	5.68941	CLM75_RS02530	5.06872	5.71575	5.08977	5.1059	5.34702	4.7258	5.33522	5.11182	4.98544	5.10857	5.17913	5.16074	5.18061	5.31205	5.20672	5.13178	4.76783	5.13042	5.19623	5.35622
	CLM75_RS02535	8.94138	8.91711	8.97188	8.84362	8.98448	8.51084	8.8825	8.977	8.68642	9.07266	9.01245	9.42708	8.80401	8.85461	8.90303	8.85017	8.80594	8.75605	8.69655	9.51393	CLM75_RS02535	8.52558	8.34765	8.51558	8.79152	8.29115	8.79557	8.41869	8.70962	8.69827	8.48222	8.73662	8.45308	8.65773	8.69803	8.46487	8.71266	8.83594	8.4228	8.73637	8.26057
	CLM75_RS02540	6.90422	7.07799	6.9581	6.71873	6.93253	6.7745	6.9535	6.83749	6.87917	6.87763	6.93519	7.42539	7.15545	6.85179	6.88079	6.97204	6.94368	7.12603	6.95085	7.50955	CLM75_RS02540	6.52591	6.39784	6.22378	6.49503	6.32982	6.48322	6.38367	6.30151	6.35775	6.31449	6.53179	6.44971	6.55835	6.48809	6.58385	6.50315	6.72413	6.29936	6.49421	6.1919
	CLM75_RS02545	8.88291	8.59954	8.78581	8.56229	9.01046	8.45397	8.56458	8.70266	8.37344	8.77385	9.2259	8.86736	8.80886	8.67244	8.88984	8.57417	8.81398	8.5337	8.54982	8.83538	CLM75_RS02545	8.41155	8.24613	8.33367	8.58679	8.34971	8.47511	8.4595	8.50471	8.46581	8.33699	8.51621	8.33305	8.40761	8.31128	8.38646	8.45966	8.5828	8.32803	8.52282	8.18818
	CLM75_RS02550	7.60428	7.31048	7.35815	7.2518	7.53299	7.93749	7.56504	7.19966	7.21416	7.39155	7.24385	7.16574	7.52391	7.226	7.30124	7.33674	7.54182	7.71795	7.90427	7.61521	CLM75_RS02550	6.9851	7.28518	6.99959	6.9268	6.9617	6.76487	7.14197	6.82669	6.98678	6.83018	6.94266	6.98808	6.97005	6.96645	7.34429	7.1028	6.83363	7.0596	7.22838	7.03557
	CLM75_RS02555	7.84349	7.98678	7.83039	8.15827	7.89071	8.53119	8.02752	7.99099	7.96368	8.13815	7.68871	7.81788	8.16662	8.06813	8.16139	7.80556	7.86593	8.03618	8.45586	7.63021	CLM75_RS02555	6.47434	7.17638	6.71105	6.80127	6.79875	6.43427	7.06354	6.52079	6.55779	6.4532	6.549	6.56728	6.88569	6.83286	7.34608	6.88912	6.70883	6.83245	7.00593	6.99124
	CLM75_RS02560	7.48221	6.99635	7.12001	7.16709	7.49702	7.57241	7.03898	7.35867	7.02403	7.36921	7.223	6.74397	7.12885	7.42958	7.45391	7.11677	7.34168	6.88955	7.77253	6.53372	CLM75_RS02560	5.88868	6.39916	6.1275	6.3212	6.16115	5.83109	6.50627	5.9556	6.01413	6.05167	6.1475	6.16412	6.09183	5.91159	6.517	6.28734	5.96824	6.25322	6.43933	6.28798
	CLM75_RS02565	7.34836	7.56951	7.47337	7.17081	7.56424	7.48964	7.37728	7.5172	7.44918	7.2551	6.98235	7.28737	7.61309	7.55189	7.53866	7.45479	7.4018	7.56085	7.74516	7.01269	CLM75_RS02565	5.84838	6.28328	5.96559	6.34811	5.96625	5.64769	6.50254	5.88742	6.07064	6.15105	5.96292	6.03251	6.36182	5.96223	6.61095	6.37543	6.06295	6.22662	6.60987	6.20805
	CLM75_RS02570	6.27532	6.60002	6.31239	6.64257	6.39702	7.02225	6.93536	6.74446	6.8157	6.71647	5.90208	6.6273	7.05042	6.85959	6.45341	6.68298	6.27718	6.89604	7.01526	6.35037	CLM75_RS02570	6.01287	6.18936	5.90732	6.0609	5.73811	5.68744	6.16664	5.78527	5.74073	5.92635	5.73308	5.87778	5.82818	5.89865	5.93725	5.99971	5.65061	5.96171	6.01133	5.89135
	CLM75_RS02575	7.98742	7.78278	7.89342	7.96917	7.9288	7.77319	7.77791	7.87653	7.90111	7.94587	7.71921	7.83946	7.76191	7.73829	7.90732	7.95671	7.8338	7.84216	7.55917	8.05149	CLM75_RS02575	6.71984	6.89957	6.80632	6.58149	6.5981	6.9973	6.47563	6.72308	6.75239	6.73061	6.74413	6.71605	6.7368	6.82213	6.58689	6.65032	6.72341	6.75729	6.63745	6.51952
	CLM75_RS02580	7.04704	6.64816	6.92978	6.76809	6.87076	6.8291	6.96508	6.69342	6.96888	6.62524	6.8385	7.15067	7.11977	7.01798	6.8737	6.71702	6.8798	7.12923	7.10917	7.36562	CLM75_RS02580	6.30441	6.11292	6.16245	6.37758	5.47575	6.36764	6.39578	5.77465	5.82111	5.51837	5.58317	6.11628	6.70057	6.25915	6.6302	6.35316	6.45748	6.12192	6.55532	6.08794
	CLM75_RS02585	6.74122	7.14572	6.82961	7.10908	6.77893	7.15211	6.80991	6.94534	7.48392	7.03935	6.5451	6.98669	7.03532	7.13562	6.92899	6.64619	6.75509	6.92334	7.25015	7.14563	CLM75_RS02585	6.42951	6.10096	6.31448	6.55632	5.68631	6.66133	6.60543	5.80837	5.90747	5.47107	5.74399	6.36407	6.13423	6.48871	6.76763	6.47158	6.73352	6.30282	6.62562	6.14431
	CLM75_RS02590	5.95036	6.83105	6.34566	6.54252	6.08434	6.94665	6.92306	6.36029	6.76466	6.70818	5.94374	6.32476	7.1103	6.67196	6.27727	6.52948	6.17404	6.98727	7.02507	6.33501	CLM75_RS02590	5.47201	6.24504	5.67531	5.78044	5.57269	5.23606	5.98775	5.58824	5.5919	5.27938	5.45844	5.36664	5.34126	5.77762	6.09268	5.88389	5.60255	5.92125	5.95741	5.92852
	CLM75_RS02595	7.65908	7.53247	7.36656	7.56182	7.4454	7.77672	7.41157	7.60921	7.32519	7.50647	7.20224	7.51048	7.32624	7.63591	7.45662	7.41801	7.89725	7.30765	7.73477	7.54926	CLM75_RS02595	6.32311	6.39122	6.40942	6.53305	6.29873	6.30031	6.45263	6.35184	6.15889	6.38849	6.24801	6.29798	6.46841	6.02058	6.79414	6.59587	6.18589	6.12924	6.46159	6.27722
	CLM75_RS02600	5.93215	5.94928	5.85842	5.49985	5.97053	6.11397	5.93863	5.61665	5.92122	5.63045	5.65932	5.61879	6.07895	5.75934	5.76786	6.07607	5.79927	6.34078	6.29502	5.61071	CLM75_RS02600	5.30232	5.38476	5.21588	5.23455	5.51658	5.47375	5.28774	5.25505	5.32828	5.42051	5.47709	5.48003	5.25935	5.45658	5.13387	5.24921	5.53641	5.34258	5.32224	4.99593
	CLM75_RS02605	5.71581	5.73783	5.74365	6.07314	5.78682	5.87731	5.98088	5.84661	6.04575	6.02829	5.65702	5.72292	5.97915	5.83021	5.82307	5.77073	5.5209	5.84383	5.47663	5.92975	CLM75_RS02605	6.90704	6.40074	6.82577	6.32887	6.346	7.09042	6.07782	6.84792	6.958	6.46934	6.70185	6.72282	6.72575	7.04407	6.42501	6.2545	6.92472	6.5325	6.24238	6.11942
	CLM75_RS02610	6.71788	6.67789	6.77177	6.46996	6.84677	6.64586	6.52771	6.64338	6.52255	6.62925	6.78656	6.62679	6.32183	6.57196	6.56925	6.69793	6.76207	6.45093	6.59926	6.81466	CLM75_RS02610	7.22766	6.89938	7.08951	6.65231	6.86141	7.09575	6.4843	7.0884	7.13199	7.0289	7.18745	6.81446	6.94406	7.2327	6.35373	6.71569	6.99306	6.88901	6.66242	6.49959
	CLM75_RS02615	7.28879	7.1513	7.3529	6.90331	7.36002	7.21443	7.14308	7.17004	7.00737	6.86375	7.26251	7.24872	7.37315	7.02359	7.3626	7.2859	7.30924	7.20046	7.18563	7.52723	CLM75_RS02615	6.84658	6.52395	6.95642	6.61364	6.49755	7.04499	6.40722	6.79129	6.85081	6.58271	6.89981	6.75802	7.1482	7.01951	6.7703	6.56457	6.94289	6.73923	6.57224	6.46443
	CLM75_RS02620	8.87374	8.50741	8.61639	8.41128	8.93825	8.84309	8.50403	8.62348	8.38496	8.53419	8.66513	8.57251	8.37323	8.62937	8.81579	8.70745	8.73995	8.70219	9.01025	8.43458	CLM75_RS02620	7.46665	7.51232	7.31397	7.41194	7.24165	7.47273	7.44552	7.35233	7.52133	7.37263	7.44983	7.39899	7.16056	7.67415	7.66827	7.40102	7.70183	7.53298	7.65197	7.27938
	CLM75_RS02625	9.66019	8.89062	9.30076	9.0479	9.76347	9.37661	8.70327	9.33557	8.83982	9.09705	9.32646	9.00671	8.78505	9.25275	9.51227	9.25596	9.41854	9.01275	9.54146	8.87634	CLM75_RS02625	7.55696	7.82731	7.59571	7.72661	7.75772	7.48757	7.84321	7.65746	7.65437	7.71339	7.58694	7.67654	7.71701	7.60099	7.83902	7.7629	7.8473	7.65867	7.82638	7.57654
	CLM75_RS02630	10.4856	10.3852	10.1757	9.90729	10.5284	10.5637	10.1089	10.264	10.1385	9.56921	10.3342	10.1647	10.2299	10.166	10.2634	10.0642	10.55	10.2772	10.3308	10.2709	CLM75_RS02630	9.17567	9.78545	9.54986	9.39221	9.81629	8.88615	9.5576	9.69207	9.63339	9.65775	9.67716	9.80115	9.55719	9.3446	9.96106	9.47824	9.64075	9.72553	9.63038	9.77742
	CLM75_RS02635	11.0734	11.2432	11.0518	10.4696	11.2009	11.2534	10.8964	10.955	10.9488	10.3318	11.0201	11.1623	11.1487	11.1813	11.482	11.1554	11.3334	11.2102	11.1242	11.0074	CLM75_RS02635	10.0058	10.1681	10.3916	9.96418	10.2556	10.005	10.064	10.5035	10.2428	10.065	10.4363	10.2431	10.3318	10.0446	10.4069	10.0497	10.3057	10.1599	9.97723	10.2877
	CLM75_RS02640	10.1777	10.2089	10.0477	9.6811	10.304	10.5049	10.3136	10.3162	10.0233	9.73299	9.95981	10.3326	10.1801	10.3785	10.4488	10.4079	10.1735	10.3426	10.3	10.3381	CLM75_RS02640	9.55849	9.61105	9.70648	9.54367	9.62224	9.39764	9.68058	9.64472	9.70522	9.57498	9.54225	9.69013	9.59601	9.61218	9.63498	9.63567	9.63555	9.72815	9.66723	9.62249
	CLM75_RS02645	9.04032	9.57292	9.33445	8.8558	9.18237	9.42782	9.43877	9.50773	9.29956	9.15822	9.07938	9.5663	9.60293	9.5084	9.40541	9.4565	9.24672	9.62575	9.554	9.33346	CLM75_RS02645	9.38374	9.71051	9.74397	9.89335	9.78831	9.29865	9.96975	9.6555	9.65889	9.75088	9.70593	9.89594	9.90481	9.60544	9.95403	9.93489	9.66388	9.77606	9.83755	10.0231
	CLM75_RS02650	9.32788	9.26152	9.42096	9.04419	9.48211	9.37525	9.02778	9.44733	9.11891	9.23759	9.5771	9.24677	9.42668	9.38553	9.70181	9.27919	9.32927	9.36383	9.29953	9.19067	CLM75_RS02650	9.21729	9.38158	9.38746	9.72842	9.51085	9.1909	9.6758	9.40847	9.47853	9.46882	9.51165	9.57913	9.61447	9.38924	9.59201	9.70402	9.52251	9.6245	9.69829	9.67504
	CLM75_RS02655	7.69462	7.08609	7.40371	7.2477	7.8941	8.00165	7.13747	7.36142	7.20306	7.13723	7.49878	6.58256	7.44687	7.41513	7.76728	7.13726	7.58121	7.2062	8.12675	6.75228	CLM75_RS02655	6.41215	7.41442	6.69852	6.9854	6.93618	5.94193	7.20885	6.58641	6.49784	6.95919	6.58181	7.17077	6.50764	6.53306	7.43046	7.14134	6.48938	6.97303	7.07462	7.20702
	CLM75_RS02660	9.25094	7.64032	8.71471	8.69152	9.21479	8.9927	7.94455	8.92492	7.6142	8.63079	9.20262	8.05392	7.99926	8.86177	9.24953	8.4946	9.22305	7.68231	9.08679	7.78885	CLM75_RS02660	7.25956	8.16722	7.81759	8.29529	7.96894	7.07404	8.39935	7.78351	7.73462	7.86257	7.80992	7.94415	7.84251	7.55075	8.33549	8.32608	7.47564	7.99264	8.22899	8.30253
	CLM75_RS02665	6.41626	7.1929	5.65353	5.97547	6.55602	5.44145	7.04349	6.27488	7.22108	6.09172	6.82805	6.89923	7.33636	6.02048	6.31217	6.28196	6.29546	7.68037	5.8184	6.47769	CLM75_RS02665	4.41312	4.62332	4.57238	5.02259	5.09365	4.46289	4.38316	5.70071	5.66385	5.48225	5.31216	4.06177	3.91752	5.0278	4.3116	4.78464	4.53984	4.71779	4.89831	4.91026
	CLM75_RS02670	6.72696	6.36624	6.49823	6.54602	7.00721	6.7263	6.36261	6.98994	6.50079	6.80767	6.47009	6.49924	6.52867	7.01505	7.247	6.77429	6.90989	6.99548	7.33371	6.38827	CLM75_RS02670	4.99679	5.14339	5.04873	5.18565	4.91387	5.0744	5.0281	5.07558	5.23835	5.65161	4.95175	5.04364	4.63666	5.03458	5.39859	5.33525	5.18281	5.37331	5.59148	4.98273
	CLM75_RS02675	7.52276	7.48481	7.59818	7.84828	7.59317	8.37345	7.76314	8.34086	7.56516	8.12366	6.84027	8.18303	7.72194	8.43522	8.01518	8.25	7.88393	7.94848	8.64613	7.71248	CLM75_RS02675	6.28335	6.48321	6.65079	6.68434	6.29379	6.39348	6.50467	6.57983	6.56954	6.29923	6.34794	6.30948	6.57998	6.66175	6.82403	6.59726	6.5347	6.45463	6.67318	6.56227
	CLM75_RS02690	10.2832	10.0129	10.2109	10.1282	10.1764	9.86185	10.0419	10.2263	9.88971	10.1522	10.1272	10.2366	9.9409	10.1936	10.2073	10.1846	10.184	10.1005	9.90643	10.1501	CLM75_RS02690	9.71764	9.69797	9.84951	9.95895	9.72267	9.90325	9.77173	9.88379	9.85574	9.76238	9.86988	9.57947	9.57615	9.8124	9.69036	9.90318	9.84429	9.6961	9.83682	9.6429
	CLM75_RS02695	8.33387	8.60761	8.50917	7.8765	8.54032	7.93801	8.52996	8.21611	8.24579	8.10491	8.32071	8.52872	8.29612	8.31974	8.2761	8.67491	8.16104	8.72329	8.32515	8.35264	CLM75_RS02695	7.91305	7.96425	7.78063	8.09376	7.89751	7.93755	8.04834	7.89071	7.96569	7.90708	7.9108	7.8932	7.84762	7.80601	8.02732	8.03622	8.13141	7.99224	8.0823	7.73671
	CLM75_RS02700	11.5714	9.15796	10.6703	10.579	11.5752	11.6511	9.85668	11.6031	9.38533	10.5475	11.0477	10.0737	9.85352	11.3089	11.7583	10.5621	11.8604	9.43469	11.5714	9.81422	CLM75_RS02700	9.27897	10.2737	10.2072	10.398	9.86506	8.92005	10.5468	10.0483	9.93675	9.90252	9.72309	10.4131	9.94913	9.89025	10.9324	10.6107	9.84229	10.3951	10.628	10.5101
	CLM75_RS02705	10.4576	8.2372	9.57112	9.40143	10.5362	10.4107	8.83226	10.5249	8.30425	9.4867	10.0451	9.03894	8.78853	10.2058	10.7528	9.61827	10.8844	8.295	10.469	8.70731	CLM75_RS02705	8.19279	9.13737	8.97978	9.3387	8.7211	7.76844	9.38063	8.9142	8.81829	8.92925	8.67192	9.31592	8.78959	8.7603	9.84018	9.60368	8.70806	9.2992	9.58526	9.43605
	CLM75_RS02710	11.8426	10.1096	11.0452	10.7303	12.0761	11.5718	10.4955	11.9493	9.99008	10.9832	11.4821	10.686	9.99536	11.5822	12.0004	11.2173	12.2058	10.1519	11.8326	10.1699	CLM75_RS02710	9.47079	10.4766	10.2256	10.6129	9.89175	8.97031	10.6894	10.2863	10.1635	10.078	9.90199	10.6742	9.94199	9.98119	11.1348	10.6876	10.1287	10.4537	10.8073	10.5303
	CLM75_RS02715	11.0104	9.34684	10.169	10.2377	11.1862	10.8727	9.9944	11.2437	9.20058	10.2366	10.6401	9.97208	9.44939	10.8218	11.4029	10.5645	11.1887	9.63503	10.9469	9.55252	CLM75_RS02715	8.58681	9.57524	9.46775	9.91912	9.11379	8.30288	9.92316	9.38366	9.36422	9.38614	9.18677	9.76319	9.25685	9.3352	10.228	10.113	9.22437	9.82206	10.1301	9.85549
	CLM75_RS02720	6.89519	7.07287	6.91798	7.21787	7.0361	7.29669	7.06519	7.05467	7.10708	7.28968	6.81186	6.74957	7.01481	6.93942	7.05883	6.85322	6.93342	6.9362	7.12828	6.74201	CLM75_RS02720	5.66105	6.40758	5.82805	5.99941	6.03072	5.31306	6.26359	5.89646	5.73917	5.74868	5.84626	6.10123	5.75941	5.80365	6.43009	6.14288	5.70155	5.97315	6.24167	6.26365
	CLM75_RS02725	7.47302	6.62403	6.96347	7.05358	7.45256	7.64732	6.77548	6.9072	6.86007	7.09459	7.02111	6.33348	7.09249	7.00873	7.51769	6.67103	7.26264	6.88598	7.5264	6.15534	CLM75_RS02725	5.85267	6.88269	6.29121	6.44687	6.3567	5.84959	6.48592	6.18022	6.20446	6.163	6.13235	6.11347	6.11319	6.23582	6.82788	6.47674	6.00806	6.36737	6.47545	6.59514
	CLM75_RS02730	6.05263	6.73701	6.57539	6.65176	6.08196	7.18128	6.74865	6.66174	6.36292	6.77457	5.92473	6.38829	6.53649	6.9451	6.05572	6.51864	6.12478	6.45519	7.18788	6.00598	CLM75_RS02730	6.01989	6.4629	6.39731	6.65985	6.39754	5.9015	6.90759	6.33661	6.27688	6.14202	6.05925	6.48056	6.46841	6.29276	7.13107	6.76613	6.38783	6.56092	6.88251	6.42677
	CLM75_RS02735	6.30089	6.69942	6.53063	6.52003	6.05914	6.73268	6.06396	6.65646	6.4193	6.36317	6.06584	6.14829	6.32691	6.78517	6.29748	6.25987	6.43486	6.24533	6.59813	6.06408	CLM75_RS02735	5.3608	5.59885	5.60735	5.69636	5.67401	5.49814	6.0814	5.6726	5.60395	5.66848	5.33278	5.80071	5.59306	5.34105	6.4519	5.99422	5.41059	5.69796	6.08351	5.87478
	CLM75_RS02740	4.50281	4.81124	4.98621	4.70577	4.44672	4.98246	4.88662	4.99462	4.79398	4.83835	4.2348	5.05367	5.14465	4.93784	4.42674	4.93327	4.51002	4.88713	4.85136	4.75993	CLM75_RS02740	4.12898	4.4178	4.38044	4.48327	3.9468	4.39367	4.54309	4.38451	4.37121	4.19293	4.38912	4.5262	4.13357	4.48838	4.6444	4.51298	4.35005	4.6943	4.68366	4.26505
	CLM75_RS02745	5.37524	5.87466	5.69561	5.85384	5.33264	5.14524	5.93309	5.30088	6.12116	5.85631	5.89087	5.62488	6.26586	5.41315	5.24705	5.56455	5.24517	6.02853	5.0783	5.81743	CLM75_RS02745	6.55432	6.11227	6.33038	6.42133	6.12129	6.61342	6.09631	6.56462	6.50183	6.30193	6.40577	6.24762	6.45843	6.51439	5.71944	6.26716	6.54376	6.20739	6.23814	6.31191
	CLM75_RS02750	6.12713	6.24153	6.27525	6.29522	6.10735	5.86077	6.20442	6.14227	6.47421	6.46443	6.02181	6.04062	6.4645	6.10548	5.91625	6.0256	5.84718	6.44751	5.92524	6.02415	CLM75_RS02750	5.50968	5.73887	5.15271	5.60187	5.03864	5.4074	5.37654	5.56574	5.46736	5.49176	5.53478	5.29572	5.64676	5.2924	5.5771	5.50108	5.54956	5.25162	5.46676	5.16896
	CLM75_RS02755	4.84207	5.1715	5.13364	5.01694	4.76586	5.0007	5.32649	5.1472	5.12232	5.20498	4.94615	5.13284	5.29057	4.96329	4.89843	5.02606	4.81436	5.20763	4.74819	5.03654	CLM75_RS02755	5.06502	4.86867	4.94586	5.10485	4.92509	5.26218	4.93792	5.11384	5.04644	4.90771	5.11053	4.75491	4.66006	5.27247	5.0217	4.74997	5.16797	4.67575	5.07249	4.64313
	CLM75_RS02760	6.8176	7.22858	6.92232	6.85151	6.50538	7.13799	7.16472	7.07338	7.26579	6.69237	6.5162	7.33682	7.12107	7.10757	6.53723	7.27493	6.92493	7.11351	6.80099	6.87264	CLM75_RS02760	5.95211	5.86917	6.12547	6.42259	5.88814	6.36161	6.36326	6.15521	5.85657	5.79934	5.78771	6.02555	6.13005	6.25408	6.65644	6.4879	6.11692	5.9235	6.35484	5.76477
	CLM75_RS02765	9.52087	11.7877	11.228	11.511	9.25054	10.4248	11.683	11.3961	11.5828	11.9163	10.7589	12.4119	11.9379	11.2509	9.68643	11.1222	9.94707	11.5515	10.4184	12.6936	CLM75_RS02765	11.2437	11.4021	11.7404	12.2306	11.5598	11.3002	12.315	11.5909	11.4797	11.6075	11.4717	11.8451	11.6335	11.2531	12.3518	12.4026	11.3482	11.5066	12.2449	11.6839
	CLM75_RS02770	6.69646	7.29756	7.2978	7.48695	6.57731	7.18128	7.82768	7.15197	7.4774	7.76798	6.94087	7.45593	7.77416	7.47058	6.75218	7.23725	6.76104	7.60394	6.98082	7.48273	CLM75_RS02770	7.04576	7.07201	7.24482	7.2791	6.92345	7.23265	7.07075	7.38623	7.30634	7.00861	7.1558	6.94607	7.04085	7.30034	7.18315	7.30977	7.12897	7.07155	7.38194	6.95793
	CLM75_RS02775	5.6671	6.07693	5.81156	6.12089	5.54635	6.10229	6.38071	5.83731	6.20684	6.14903	5.49127	5.91684	6.39734	6.00468	5.71215	5.87639	5.7775	6.11576	5.94132	6.12351	CLM75_RS02775	5.06131	5.5901	5.21588	5.28371	5.16838	5.08712	5.22449	5.2841	5.27327	5.03459	5.20568	5.09581	5.33401	5.21097	5.44282	5.34855	5.05038	5.29998	5.402	5.16118
	CLM75_RS02780	5.14053	4.93909	5.22332	5.54764	4.87304	5.29725	5.09292	5.35705	5.11463	5.37125	4.69796	5.47313	4.91335	5.34163	5.07222	5.24973	5.0622	5.07962	5.19413	5.19852	CLM75_RS02780	4.20039	4.30065	4.48986	3.9765	4.11578	4.44171	3.58741	4.21382	4.34819	3.82274	4.22489	4.20938	4.4207	4.39667	4.03761	4.03888	4.29648	4.0723	3.84464	4.23198
	CLM75_RS02785	5.13371	5.13055	5.19882	5.29108	5.21804	4.45395	5.26898	5.04274	5.43002	5.14109	5.452	5.32865	5.35282	4.83947	4.98088	5.10951	5.0076	5.2689	4.13085	5.41177	CLM75_RS02785	7.08433	6.86024	6.25187	6.03739	6.87055	5.77534	6.71256	6.09397	6.05902	6.7986	6.36217	6.62496	5.75398	6.39833	4.19708	6.03017	5.50976	6.52623	4.80598	7.13779
	CLM75_RS02790	4.53074	5.0341	4.59375	4.3557	4.54681	4.0374	4.93641	4.25809	5.09857	4.46418	4.81092	4.53515	4.70525	4.40843	4.30248	4.68197	4.42664	5.10658	4.2214	4.83296	CLM75_RS02790	6.0767	5.53401	5.04552	5.1453	5.41111	5.10167	5.32802	5.05184	5.23245	5.71659	5.46065	5.38229	4.79304	5.66857	4.07268	5.14481	4.9071	5.35927	4.42272	5.79023
	CLM75_RS02795	5.34606	5.24336	5.26615	5.2689	5.38187	4.67573	5.40667	4.84983	5.11353	5.30061	5.50924	5.12138	5.00078	4.98186	5.2494	5.08507	5.72559	5.18251	4.47965	5.76142	CLM75_RS02795	6.77407	5.8997	6.29661	5.87168	6.68032	6.31161	5.74975	6.28424	6.26463	6.638	6.6213	6.29633	6.63121	6.41985	5.12137	5.70463	6.25372	6.2872	5.37654	6.67796
	CLM75_RS02800	4.59828	4.61995	4.61729	3.94745	4.31504	3.84221	4.45142	4.08266	4.39473	3.94419	4.36736	4.4415	4.35544	4.05568	4.46365	4.4977	4.64695	4.54648	3.82683	4.65076	CLM75_RS02800	4.56046	4.18175	4.54085	4.01508	4.62247	4.85961	4.04826	4.31348	4.42137	4.59414	4.61591	4.57057	4.80359	4.48838	4.00167	3.99218	4.70166	4.24392	4.07573	4.55971
	CLM75_RS02805	3.5178	4.25171	3.92667	4.08337	3.6168	3.4553	3.99095	3.33028	4.34018	3.97095	3.88566	3.527	4.09699	3.80768	3.51804	3.54108	3.52858	3.77576	3.4644	3.95822	CLM75_RS02805	4.32104	3.88889	3.98915	3.54859	4.07895	4.23032	3.42135	3.86058	3.79826	3.90572	3.97308	3.86649	3.38296	4.2117	3.38714	3.52364	3.89962	3.77666	3.25139	4.40678
	CLM75_RS02810	2.94767	3.35816	3.07941	3.56359	2.89843	2.62928	3.3304	2.8619	3.52828	3.2013	3.29985	2.94038	3.24606	2.84695	3.02016	2.68293	3.52858	2.9889	2.74426	3.45642	CLM75_RS02810	3.93195	3.19361	3.33272	3.18449	3.68923	3.26431	3.04154	3.38511	3.56449	3.85258	3.54427	2.85878	3.29599	3.63937	1.99892	2.6687	3.14916	3.39473	2.66094	4.04155
	CLM75_RS02815	2.67481	3.35566	3.12393	3.26909	2.90383	2.49849	3.08257	2.97063	2.95996	3.07246	3.42682	3.19662	3.02475	2.72881	2.83227	3.12413	3.07357	3.16005	2.22743	3.45317	CLM75_RS02815	3.67485	3.2602	3.32921	2.80392	3.7373	3.39915	2.83347	3.19932	3.39778	3.43287	3.75311	3.36635	3.61623	3.37677	2.98856	2.76312	3.71944	3.27315	2.7066	3.68766
	CLM75_RS02820	-1.4141	-0.252808	-0.804324	-1.13673	-1.63208	-1.16796	-1.65613	-1.27664	-1.42056	-1.33459	-2.44367	-1.99391	-0.961423	-2.02969	-1.88949	-1.32291	-2.65103	-0.881426	-1.64261	-0.546637	CLM75_RS02820	-2.1267	-1.64576	-0.870279	-1.29161	-0.748895	-1.16009	-1.02092	-1.45533	-2.89706	-4.12869	-2.66095	-4.12869	-4.12869	-2.24621	-4.12869	-2.03415	-2.61386	-1.36682	-3.40903	0.102642
	CLM75_RS02825	6.10871	6.62636	6.87833	7.12194	6.22101	6.73359	6.92213	6.81725	6.77009	7.29053	6.57922	6.8097	6.95148	6.74443	6.34733	6.6542	6.10663	6.85881	6.86824	6.67737	CLM75_RS02825	6.87431	6.88533	6.83012	7.15656	6.71674	6.65379	7.01278	7.0701	7.07664	6.71107	6.98849	6.7314	6.5861	6.93465	6.63754	7.16653	6.83161	6.90871	7.09953	6.89536
	CLM75_RS02830	7.13495	7.23028	7.59867	6.55679	7.19713	7.43537	7.15642	7.45328	6.86007	7.02637	6.94252	7.22282	7.32822	7.05527	7.39657	7.26429	7.01419	7.23208	7.28065	7.26665	CLM75_RS02830	5.25874	5.72125	5.69181	5.73969	5.39852	5.43369	5.70874	5.55783	5.50702	5.65303	5.39063	5.79488	5.75941	5.42081	5.69151	5.72619	5.73789	5.87266	5.79637	5.72967
	CLM75_RS02835	5.69744	6.22797	6.19928	6.26076	5.85952	6.40733	6.48541	6.04367	6.25736	6.36363	5.70792	6.06101	6.37788	6.13895	5.94601	5.88458	5.62885	6.31509	6.38134	5.92038	CLM75_RS02835	5.02751	5.71279	5.11242	5.31588	4.8928	4.79426	5.30374	5.17005	5.01067	5.08782	4.91682	4.76688	4.81406	5.08768	5.29475	5.13178	4.85776	5.11674	5.45099	5.34595
	CLM75_RS02840	1.49191	3.51602	2.17398	2.67498	1.5342	1.48081	3.21637	1.70398	3.69522	3.23179	2.10811	2.03646	3.47093	2.22946	1.56215	2.21329	1.24456	3.21197	1.84745	2.51596	CLM75_RS02840	2.24025	1.36358	1.31153	1.28758	0.650756	1.22046	0.517118	1.22601	1.43141	1.92682	0.931979	1.83416	2.36258	2.05875	2.26459	1.71075	0.977235	1.69817	1.60106	1.7644
	CLM75_RS02845	1.61442	4.43285	2.67805	3.09225	1.62859	2.01516	4.01389	2.16396	4.66902	3.63	2.33806	2.82503	4.21868	2.60013	1.97951	2.3771	2.13285	3.02906	2.04552	2.67496	CLM75_RS02845	1.41307	1.06675	1.38101	1.42875	1.0526	1.19174	1.1605	1.10096	1.41065	1.7689	1.25035	1.36517	1.53863	1.33052	1.31131	1.48844	0.413068	1.5548	0.985407	0.498349
	CLM75_RS02850	0.647294	2.57381	1.42849	1.73013	1.13548	0.704184	2.99306	1.24851	3.25404	1.90666	1.2003	1.72437	2.24781	0.747883	1.28509	1.73181	0.838195	1.7305	0.661002	1.67906	CLM75_RS02850	0.655227	-0.117817	0.302015	-0.303981	0.0455791	0.269231	0.412036	1.10096	0.05647	1.1217	0.380951	0.126596	-1.10772	0.706355	-2.66029	-0.453415	1.29076	0.713009	0.199037	0.166261
	CLM75_RS02855	3.73442	4.08269	4.02677	3.76279	3.40071	1.38533	5.12244	2.87875	4.29521	4.09223	4.17173	3.47843	3.61828	3.44251	3.47584	3.85752	3.75055	3.83622	1.30089	3.4885	CLM75_RS02855	0.300105	0.733362	0.940122	0.859025	-0.102771	0.543719	0.874378	0.839083	0.549768	-0.00953533	0.453648	0.396835	1.89488	0.706355	0.827434	0.450022	0.0185306	0.627391	0.873397	0.639529
	CLM75_RS02860	2.66854	2.75871	2.89264	2.1999	2.4662	2.6551	3.04538	2.32007	3.04103	2.55043	2.46974	2.35292	2.57094	2.19804	2.22217	2.83497	2.6387	2.66343	2.31046	3.18606	CLM75_RS02860	1.61538	1.70151	1.84168	2.01695	2.11326	1.95178	1.69629	1.59404	2.34121	1.08866	2.01	1.39014	2.84342	2.50181	1.80401	1.79089	2.22548	1.76985	2.13807	1.39111
	CLM75_RS02865	3.89882	4.50659	4.5228	4.69204	3.83894	4.70692	5.31588	3.99012	4.74926	4.62826	4.07852	4.73447	5.43778	4.57544	3.8174	4.57128	4.00169	4.90799	4.37307	4.85405	CLM75_RS02865	3.73193	4.45686	3.97349	4.0373	3.94365	3.83717	4.09427	3.79481	4.00632	3.41965	3.89691	4.10766	4.11675	3.98905	4.28941	3.65579	4.19557	4.08239	4.01764	4.29382
	CLM75_RS02870	7.99512	7.26207	7.49286	6.82476	8.09507	5.48816	7.5115	7.39814	7.47547	7.17603	7.52567	7.61606	6.77134	6.67225	8.14307	7.66646	8.44769	6.98354	5.1415	8.03896	CLM75_RS02870	7.79152	6.15384	7.46401	7.00639	7.22261	7.99814	6.34435	7.75104	7.56162	7.14796	7.26777	6.75742	7.03862	8.0617	6.34659	6.64844	7.68741	6.94538	6.74157	7.04829
	CLM75_RS02875	7.31662	7.80783	7.564	7.302	7.31232	7.28908	7.87819	7.5635	7.8802	7.41444	7.3833	7.96276	7.79184	7.47058	7.49674	7.34508	7.29114	8.02094	7.01104	8.3237	CLM75_RS02875	9.15132	8.68091	9.07543	9.31012	8.96081	9.44513	9.16766	9.24827	9.24526	9.11904	9.06797	9.04363	9.28957	9.14299	9.10836	9.24491	9.43524	9.0528	9.21011	9.00537
	CLM75_RS02880	7.41027	7.67146	8.90559	8.53219	6.75409	8.4155	7.72128	8.03265	8.07075	8.63593	9.26863	8.56063	7.56298	7.92232	6.4466	6.37639	7.00594	7.53775	7.40843	10.1308	CLM75_RS02880	10.7289	11.1159	11.0327	11.3187	11.1689	10.6854	11.4924	10.9539	10.9343	11.0845	10.9167	11.093	11.1007	10.8748	11.3443	11.4343	10.8609	11.1364	11.2769	11.3829
	CLM75_RS02885	6.54251	5.64035	5.82511	4.92896	6.58867	4.03347	5.33981	5.26183	5.58872	4.87358	6.67983	5.50545	5.12532	4.70177	6.21971	5.9625	6.33411	5.5856	3.74507	6.52911	CLM75_RS02885	5.13723	4.5008	4.6177	4.56202	4.54564	4.8516	4.48598	4.83174	4.89303	4.76598	4.92803	4.65799	4.62481	4.95465	4.39016	4.53874	5.15942	4.72811	4.57484	4.41335
	CLM75_RS02890	5.29099	5.38207	5.26615	4.91622	5.43601	5.02169	5.73867	4.8312	5.44368	5.04992	5.47046	5.15127	5.23155	5.00201	5.15728	5.45732	5.25619	5.79987	5.15382	5.80856	CLM75_RS02890	5.35576	4.89286	5.11446	4.60282	4.99216	5.69577	4.47733	5.32487	5.38394	5.04324	5.11053	4.99969	5.66423	5.57637	4.68463	4.69375	5.45842	5.1707	5.00017	4.96048
	CLM75_RS02895	4.76627	5.30666	5.05248	4.86412	4.75842	5.10366	5.21214	4.85976	5.1559	5.10476	4.49651	5.0835	4.9268	4.85768	4.72464	5.09075	4.6669	5.45901	4.90456	5.24245	CLM75_RS02895	4.40923	4.38194	4.44026	4.49134	4.23905	4.37303	4.10555	4.47549	4.49965	4.02405	4.58994	4.38115	4.40693	4.17537	4.57883	4.37028	4.43395	4.44655	4.49784	3.96312
	CLM75_RS02900	6.6262	6.94981	6.78829	6.54793	6.81701	5.86298	6.69644	6.4152	7.2081	6.71952	7.80029	6.64391	6.75005	6.06077	7.02699	6.60017	7.27588	6.56749	4.95821	7.71282	CLM75_RS02900	8.64782	7.23787	8.21786	7.74597	8.34971	8.78307	7.6634	8.34786	8.16637	8.26763	8.14131	7.86063	8.31481	8.475	7.39712	7.72055	8.34837	8.04246	7.50759	8.15794
	CLM75_RS02905	5.94648	6.14562	6.21351	5.89137	6.11436	6.11444	6.66585	5.86081	6.48234	5.93285	5.95829	6.11689	6.63178	5.95855	6.10023	6.17603	6.00359	6.81795	5.89865	6.55016	CLM75_RS02905	5.25766	5.42834	5.18416	5.07937	5.27494	4.97469	5.25899	4.99073	5.16509	5.01713	5.09783	5.14616	5.12282	5.39734	5.32415	5.26753	5.22439	5.27556	5.17424	5.36302
	CLM75_RS02910	6.7708	7.14048	6.68158	6.45039	6.70039	6.55142	6.80132	6.73255	7.32507	6.63687	6.72309	6.62781	7.2176	6.75256	6.83875	6.76751	6.9325	7.10143	6.6552	6.83352	CLM75_RS02910	5.21715	5.52291	5.30796	5.43615	5.44268	5.16212	5.70225	5.12459	5.17512	5.32265	5.11614	5.37605	5.45268	5.29945	5.82089	5.59113	5.29242	5.50367	5.69447	5.62034
	CLM75_RS02915	5.81496	6.25129	6.02319	5.38722	5.87817	5.63225	5.92799	5.99623	6.25761	5.78682	5.77735	5.77869	5.97986	5.8751	5.77983	6.01021	5.73979	6.19462	5.88825	6.0356	CLM75_RS02915	5.33134	5.34422	4.97199	5.36062	5.22913	4.95773	5.67885	5.06376	5.20256	5.58948	4.76441	5.26736	4.78242	4.98296	5.42257	5.33659	5.27274	5.2543	5.5241	5.19016
	CLM75_RS02920	6.81689	6.21497	6.47962	6.57592	6.79791	7.21117	6.26891	6.68107	6.23067	6.5407	6.25647	5.89176	6.43393	6.93442	6.88357	6.56695	6.80448	6.45547	7.18037	5.68526	CLM75_RS02920	5.07118	5.68015	5.60372	5.56027	5.43373	5.12748	5.49061	5.30433	5.43238	5.08573	5.25483	5.28078	5.22052	5.37615	6.08626	5.61004	5.42136	5.421	5.84126	5.51126
	CLM75_RS02925	7.98947	7.7224	8.18804	6.99189	8.43814	8.32883	8.14815	7.90746	7.05794	7.82717	7.19849	8.71202	7.39483	8.25452	9.079	8.7665	8.32134	8.2054	7.99148	8.65226	CLM75_RS02925	7.44382	7.30264	7.50232	7.00216	7.06492	7.68398	6.95239	7.56936	7.58353	7.42611	7.43055	7.57674	7.75962	7.5209	7.1751	6.97868	7.64938	7.21603	7.09017	6.89653
	CLM75_RS02930	5.86792	6.21703	6.20835	5.49261	5.99983	5.84291	6.17458	5.86715	5.85748	5.95403	5.68665	6.49036	6.06482	5.91429	6.46053	6.45771	5.80728	6.27132	5.89193	6.53142	CLM75_RS02930	6.14834	5.82938	6.23227	5.94109	5.74988	6.17891	5.61518	6.3392	6.27329	6.06021	6.33897	6.02755	6.11319	6.30822	5.76034	5.83982	6.21712	5.9291	5.82864	5.72835
	CLM75_RS02935	1.24455	2.67723	1.74581	1.58911	1.29201	1.11467	2.28235	1.66568	2.25652	2.11729	1.50665	2.10788	2.86616	1.72935	1.56215	2.08266	1.51307	2.0755	1.87746	2.16532	CLM75_RS02935	2.15933	1.91142	1.93704	1.48156	1.54336	2.23115	2.03981	2.42377	2.00268	1.66064	2.25342	1.26072	1.19843	1.55452	2.83363	2.09232	2.27381	2.23538	1.85809	1.5898
	CLM75_RS02940	2.58443	3.70603	3.48553	3.28137	2.78589	3.12299	3.62211	3.43267	3.63198	3.39516	2.96245	3.64774	3.66899	3.30182	2.81121	3.36802	3.09009	3.70124	3.10296	4.10408	CLM75_RS02940	3.89909	3.70986	3.92546	3.99932	3.59604	3.76103	3.42135	3.76592	4.10655	3.98418	3.70552	3.64579	3.77473	3.92484	3.92698	3.57208	4.24892	3.71574	3.64591	3.43991
	CLM75_RS02945	3.31593	3.84043	3.83257	3.7606	3.00784	3.22304	4.05189	3.91319	3.64729	3.83058	2.95872	4.32396	3.83362	3.72854	3.12286	3.74202	3.1129	3.93709	3.19721	4.46815	CLM75_RS02945	3.83106	3.54029	3.88058	4.0914	3.6703	4.21613	3.75791	4.10676	4.06397	4.03277	4.14482	3.84859	4.13357	3.89908	3.60641	4.01238	4.04592	3.7001	3.94503	3.55728
	CLM75_RS02950	2.62386	2.70098	3.21419	3.53054	2.36799	2.75398	3.31911	3.20234	3.44487	3.31008	2.54633	2.3916	3.52305	2.89867	3.02016	2.88809	2.77571	3.18488	2.69454	3.04218	CLM75_RS02950	3.3044	2.58867	2.63914	3.15634	2.38802	3.47559	2.84024	3.39624	3.16965	3.27292	2.92499	2.79476	3.03463	3.3821	3.31575	2.89227	3.44482	2.43126	3.19425	2.64464
	CLM75_RS02955	3.63822	3.87912	3.94539	4.0004	3.18248	3.71543	4.01038	3.50315	4.06831	3.90941	3.55097	3.52265	3.90183	3.60942	3.50761	3.72266	3.36174	3.95324	3.52886	3.90692	CLM75_RS02955	3.13133	3.11354	2.83509	2.88458	2.45147	3.02487	2.79915	2.89478	2.74942	1.72657	2.76279	2.49435	2.66982	3.23097	2.81304	2.94926	2.30514	2.31284	3.13172	2.204
	CLM75_RS02960	-0.498969	1.25032	1.1771	1.3652	1.17176	0.99038	1.36255	0.898263	1.54918	0.887762	1.0115	0.964356	1.95271	1.21774	1.14401	1.05135	1.2087	1.35608	0.932829	0.80401	CLM75_RS02960	1.21375	0.469532	1.0636	0.974075	0.681322	0.886	0.764836	1.56277	0.960209	0.872716	0.931979	0.993726	-4.12869	0.600715	1.05491	0.686291	1.62468	0.439215	0.244774	-0.0336848
	CLM75_RS02965	2.16171	3.00757	3.00401	3.00611	2.08374	3.04312	2.9052	2.6296	2.861	2.6858	2.7062	2.65266	2.93881	2.6977	2.40193	2.92245	2.45195	2.88162	2.87399	2.97584	CLM75_RS02965	2.33337	2.21943	2.41233	2.66241	2.58679	2.22408	2.07466	3.02096	2.34121	2.73556	2.7044	1.93942	2.1141	2.14896	2.79215	1.75937	2.74295	2.04214	2.03771	2.06069
	CLM75_RS02970	2.50218	2.80693	2.9494	2.54864	2.84326	2.27031	2.51286	2.6881	2.97703	2.69458	2.59522	3.13528	2.38413	2.64741	3.00541	2.9766	2.31251	2.87824	2.08034	2.8629	CLM75_RS02970	2.53215	2.38632	2.34437	2.41335	2.41555	2.7075	1.53881	2.2725	2.29097	2.85828	2.22254	2.2972	3.49131	2.34708	2.40879	2.23667	2.48009	2.03384	2.42803	1.86369
	CLM75_RS02975	1.8871	2.87116	2.27613	1.8421	2.21992	2.03889	2.68983	2.19118	2.84515	2.33515	1.74194	2.43852	2.64518	2.26628	2.33859	2.66275	1.49333	2.90837	1.80643	2.48449	CLM75_RS02975	1.83971	1.86938	1.95538	2.10374	2.12443	1.57196	1.76901	1.88701	2.07044	2.517	1.60974	2.00556	1.89488	1.69804	1.99892	1.71897	2.52071	1.82857	1.95758	1.4434
	CLM75_RS02980	2.8063	3.31776	3.14568	3.24735	2.95677	2.84203	3.52719	2.48312	3.23389	3.14688	2.84608	3.37125	3.11111	2.89084	2.96403	3.29121	2.69594	3.28778	2.82862	3.38664	CLM75_RS02980	2.60865	2.33428	2.50861	2.71849	2.29225	2.83367	2.2062	2.99776	2.87599	2.42733	2.99364	2.12938	1.72772	2.54042	2.53987	2.09232	2.82091	2.28515	2.26002	1.67974
	CLM75_RS02985	7.24468	7.41322	7.14587	6.8461	7.26088	6.97742	7.12941	7.00791	7.34257	6.59056	7.38712	7.07547	7.21882	6.91595	7.39427	7.18469	7.25332	7.31063	6.86481	7.34999	CLM75_RS02985	6.32878	6.33716	6.493	6.16548	6.44563	6.66133	6.09631	6.572	6.49968	6.42948	6.54329	6.5473	6.47172	6.29488	6.20362	6.24848	6.65208	6.39192	6.19219	6.33632
	CLM75_RS02990	5.47384	4.45281	5.49203	4.55719	5.23207	4.98144	4.28878	4.98688	4.51144	5.01294	6.0775	4.82378	4.39901	4.83539	4.98934	5.02902	4.85456	4.68925	5.16704	5.24057	CLM75_RS02990	4.27056	3.96216	3.88298	4.2444	4.01439	4.50726	4.38084	4.31231	4.12738	4.52789	4.14482	4.05397	3.73119	4.06715	4.19708	4.50706	3.77085	3.96731	4.12854	4.05422
	CLM75_RS02995	5.06971	4.0645	5.53799	4.58345	4.82686	4.80127	4.11036	4.95017	3.77823	4.93355	6.03117	4.51121	4.23079	4.69166	5.02636	4.51046	4.77914	4.19511	4.74954	4.99135	CLM75_RS02995	3.44381	3.80693	3.42115	4.19584	3.32311	3.70879	4.00676	3.70456	3.71391	3.7768	3.7567	3.7841	4.23056	3.67017	3.72136	3.97169	3.35783	3.43309	4.15123	3.5691
	CLM75_RS03000	4.31483	3.09981	4.59177	4.14176	3.97348	4.32801	3.43607	3.95084	3.57066	4.18449	4.98336	3.88306	3.84941	3.76972	4.14478	3.80323	3.9447	3.78301	4.04309	4.04706	CLM75_RS03000	2.55342	3.38055	2.7536	2.6738	2.81758	2.18819	2.74249	2.50416	2.56441	1.83016	2.76993	1.9224	2.62294	2.71088	3.09473	2.92461	2.4241	2.43756	2.87966	2.55241
	CLM75_RS03005	5.72717	5.31694	6.00545	5.53424	5.64401	5.69021	5.44092	5.63824	5.56956	5.69752	6.20542	5.48324	5.62646	5.51354	5.83564	5.29305	5.34006	5.46634	5.55456	5.81046	CLM75_RS03005	4.80322	5.07962	4.78469	4.89211	4.58052	4.79545	4.75307	4.56501	4.68938	4.66311	4.82389	4.52902	5.00895	5.10388	4.94807	4.72877	4.83914	4.73068	4.81359	4.67081
	CLM75_RS03010	6.7781	5.79688	7.03114	6.17864	6.68242	6.14072	5.6355	6.18069	5.64396	6.53704	7.8716	6.71282	5.46776	6.09528	6.80878	6.15134	6.32157	5.7096	5.9862	7.50191	CLM75_RS03010	6.99355	6.55436	6.94528	7.15858	6.62734	7.31858	6.97946	7.05349	7.13239	6.83143	7.09318	6.86433	7.06297	7.12885	6.56704	6.97246	7.39692	6.8141	7.09895	6.71499
	CLM75_RS03015	10.2239	6.83329	9.30877	8.17203	10.3117	7.79918	7.12759	8.26283	7.49295	8.85027	11.0583	8.86371	7.11618	8.05865	9.93391	7.93387	10.1177	7.09235	8.2313	10.0087	CLM75_RS03015	9.70527	9.07403	9.53689	10.2837	9.17314	9.96927	9.99195	9.80673	9.94238	9.61542	9.69841	9.63325	9.95269	9.68001	9.40086	9.95459	10.0304	9.43493	10.1663	9.27606
	CLM75_RS03020	7.49578	5.03332	7.04712	7.17246	7.67543	6.3373	5.0821	6.46901	5.70888	7.57089	8.93059	6.51794	5.59777	6.12064	7.40098	5.32791	7.02947	4.99713	6.14886	8.08138	CLM75_RS03020	7.98543	7.12003	7.6039	7.73785	7.37297	8.39353	7.53921	7.77895	7.7967	6.74857	7.70262	7.5689	7.7309	8.17262	6.74878	7.53868	8.27978	7.68075	7.83423	7.00055
	CLM75_RS03025	6.89351	6.11574	7.03296	7.10196	6.97132	6.91361	6.29543	7.08492	6.33482	7.74438	8.25548	6.95193	6.15398	6.68165	6.76127	6.17068	6.72103	5.86916	6.35935	7.66922	CLM75_RS03025	8.27458	7.44145	7.97039	8.25888	7.3671	8.4638	7.75734	8.12637	8.25521	7.80238	8.01863	7.94889	7.88535	8.34575	7.57351	7.9941	8.44363	7.79468	8.22231	7.49294
	CLM75_RS03030	7.16672	6.84422	7.32487	7.46323	7.18636	7.58523	7.39906	7.1234	7.19618	7.74262	8.27174	7.4953	7.3786	7.06271	7.0704	6.80627	6.90919	6.96236	7.26134	8.19169	CLM75_RS03030	7.12485	7.22736	7.10114	7.35271	6.87387	7.19177	7.39472	6.98915	7.12404	6.87023	6.89206	7.02492	7.09552	7.4771	7.39453	7.30125	7.18374	7.19432	7.46943	7.11832
	CLM75_RS03040	4.52207	4.34512	4.5516	4.18977	4.47966	4.4347	4.03991	4.87242	4.38745	4.48205	4.49522	3.99717	4.47629	4.72179	4.5815	4.39439	4.70815	4.56551	4.61645	3.91402	CLM75_RS03040	3.03382	3.50934	3.18124	3.52047	3.09237	3.38654	3.72904	3.20186	3.32475	3.17399	2.87953	3.33454	3.10454	3.56174	3.59439	3.5446	3.24115	3.23023	3.57382	2.94592
	CLM75_RS03045	5.56106	5.60407	5.58453	5.81848	5.60723	5.90124	5.62981	5.71839	5.63708	5.81193	5.40135	5.2959	5.49812	5.81787	5.44799	5.61071	5.48638	5.67642	6.06928	5.43665	CLM75_RS03045	4.49051	4.76847	4.39227	4.52003	4.24673	4.27378	4.55548	4.36764	4.25371	4.70459	4.35868	4.53182	4.56407	4.34581	4.54177	4.67064	4.54968	4.67575	4.82962	4.03305
	CLM75_RS03050	5.94518	6.08898	6.01877	6.07623	6.05308	6.40885	6.20173	6.19757	6.12745	6.21079	5.78264	5.98954	6.32635	6.1076	6.10543	6.01718	5.77648	6.40059	6.65231	5.95752	CLM75_RS03050	4.97725	5.27632	4.90398	5.11533	4.89932	4.58247	5.20759	4.72719	4.79329	4.94511	4.91199	4.99766	4.40693	5.01929	5.35296	4.91286	4.86566	4.99062	5.14363	4.70869
	CLM75_RS03055	5.96834	5.43673	5.8958	5.94493	6.11611	6.19804	5.5348	6.05914	5.72015	6.13243	5.6472	5.54673	5.85168	6.03611	5.9799	5.7007	5.70106	5.74527	6.36951	5.35635	CLM75_RS03055	4.48683	4.87552	4.31271	4.46372	4.39241	3.93787	4.72593	4.11218	4.27253	4.30147	4.27339	4.19528	3.95585	4.51286	4.50373	4.26757	4.25294	4.43085	4.62974	4.34282
	CLM75_RS03060	5.68274	5.04342	5.59247	5.67813	5.75803	5.70326	4.87413	5.64564	5.28973	5.81596	5.76939	5.0835	5.58745	5.78547	5.74805	5.38985	5.65407	5.02337	5.50815	4.91787	CLM75_RS03060	4.14308	4.61426	4.16097	4.15171	3.95308	3.62804	4.22152	4.07664	4.00286	4.04574	3.90989	3.75075	3.56756	4.11909	4.76186	3.99725	3.62946	4.04573	4.42148	4.26141
	CLM75_RS03065	6.78137	5.91964	6.77744	6.49653	6.90686	6.50497	5.72055	6.60172	5.75873	6.75616	6.81263	6.1504	6.23494	6.47863	6.89287	6.50063	6.64733	6.15782	6.65303	6.39124	CLM75_RS03065	5.13957	5.39803	4.88617	5.43949	4.96291	4.94811	5.19708	5.0462	5.15263	5.32443	5.12729	4.84572	5.01803	5.08115	5.20672	5.19575	5.22848	5.2062	5.36753	5.04117
	CLM75_RS03070	5.00274	4.91475	4.79986	4.53172	4.96765	4.53126	4.95568	4.81962	4.92915	4.56581	5.01784	5.06568	4.49046	4.66318	4.85895	4.94376	5.21385	4.74596	4.4146	5.30052	CLM75_RS03070	4.89771	4.40104	4.95158	4.53103	4.50135	4.94381	4.28242	4.83747	4.66219	5.08573	4.51972	4.81608	4.36482	4.66474	4.76722	4.43031	4.85511	4.41815	4.29946	4.45852
	CLM75_RS03075	4.66753	4.90966	4.912	4.66301	4.63554	4.98958	5.09788	4.7633	4.84732	4.73002	4.81506	5.12426	4.84883	4.75887	4.81626	5.10016	4.62671	5.16459	4.94646	5.24995	CLM75_RS03075	4.24028	4.30629	4.12091	4.17795	4.00837	4.39209	4.19273	4.09452	4.2183	4.12121	4.19605	4.11517	4.30669	4.14124	4.54801	4.10621	4.30037	4.33282	4.29811	3.67131
	CLM75_RS03080	9.31959	8.84343	9.02511	9.06659	9.3387	8.51384	8.66574	8.95492	8.86353	8.89366	9.44476	9.2168	8.53477	8.89906	9.23439	9.06149	9.15878	8.85632	8.33386	9.33809	CLM75_RS03080	7.67203	7.41989	7.72943	7.80317	7.50245	8.28526	7.57261	7.87159	7.86137	7.36532	7.65572	7.50532	7.6189	7.87631	7.8498	7.7924	7.86516	7.62697	7.9789	7.39136
	CLM75_RS03085	7.64757	6.02416	7.3135	7.27807	7.65855	7.41606	6.34115	7.35667	5.92719	7.22004	7.62568	6.71853	6.40056	7.37127	7.81738	7.06292	7.57667	6.35027	7.56649	6.04155	CLM75_RS03085	4.87537	6.15727	5.4682	6.06847	5.5006	4.63674	5.96084	5.48462	5.47426	5.51371	5.32675	5.52582	5.16434	5.43753	6.35552	5.87288	5.17435	5.8744	6.13982	6.0951
	CLM75_RS03090	7.41262	6.31071	7.20567	7.44288	7.47315	7.74401	6.54326	7.48594	6.58788	7.44273	7.17898	6.3654	7.0367	7.55267	7.6718	6.77223	7.30182	6.42222	7.77984	5.84989	CLM75_RS03090	5.59847	6.83335	6.09736	6.58262	6.09812	5.18233	6.76285	6.01276	6.00852	5.89443	5.93701	6.03251	6.17135	6.12984	6.9983	6.5491	5.51981	6.26345	6.70241	6.42515
	CLM75_RS03095	7.51141	6.57131	6.72873	6.61008	7.72967	7.14256	6.28314	6.95794	6.55172	6.44591	7.43474	6.09436	6.74373	6.84268	7.54919	6.8701	7.42102	6.33986	7.06447	5.8325	CLM75_RS03095	4.46267	5.1603	4.98655	5.26218	4.95979	4.39209	5.34119	4.81026	4.89397	4.58528	4.80838	5.06124	4.79304	5.0713	5.5179	5.40631	5.09364	5.13042	5.58982	5.23906
	CLM75_RS03100	8.34227	8.38886	8.04995	7.61281	8.47954	8.53849	8.31416	7.98824	8.27861	7.79588	8.19937	7.68822	8.42103	8.259	8.30905	8.20251	8.53541	8.62554	8.76204	7.54201	CLM75_RS03100	6.89598	7.64919	7.22323	7.34894	7.38984	6.58679	7.73527	7.18656	7.10175	7.02998	7.10803	7.26533	7.07608	7.13004	7.98423	7.54837	7.04038	7.46846	7.57643	7.58056
	CLM75_RS03105	7.62244	7.44565	7.53699	7.5815	7.55505	7.89952	7.3643	7.69233	7.53554	7.5808	7.40283	7.48612	7.57205	7.59745	7.79597	7.50064	7.6265	7.53869	7.64037	7.50486	CLM75_RS03105	5.73116	6.31775	5.93646	5.98634	6.0098	5.76014	6.23306	5.71099	5.83238	5.87881	5.72851	5.83522	5.69854	5.84086	6.43178	5.96083	5.86819	5.9639	6.25116	5.88782
	CLM75_RS03110	5.48548	5.78489	5.8821	5.79137	5.76249	6.48424	6.21092	5.549	5.96036	6.22299	5.20508	5.28438	6.00687	5.93063	5.80455	5.70131	5.47384	5.96902	6.53441	5.16019	CLM75_RS03110	4.18457	5.65385	4.65605	4.82983	4.50135	3.86016	4.96603	4.28262	4.56922	4.29786	4.36812	4.62418	4.06509	4.59996	5.77372	4.99213	4.10053	4.89654	5.02495	5.1709
	CLM75_RS03115	8.4149	7.25623	8.22491	8.23286	8.72495	8.48624	7.69409	8.56929	7.50613	8.19238	7.6561	7.92268	7.85792	8.53948	8.86981	8.2929	8.69213	7.31704	8.61696	7.55646	CLM75_RS03115	6.9942	8.22864	7.57083	7.8638	7.51444	6.49613	8.00533	7.46234	7.5628	7.41615	7.51126	7.58893	7.10834	7.53321	8.11299	7.90889	7.12459	7.73884	7.94931	7.84303
	CLM75_RS03120	7.49888	6.54092	7.46068	7.30463	7.84457	7.57123	7.10312	7.52279	6.93591	7.55772	6.96688	7.08987	7.26693	7.60839	8.21699	7.22181	7.72511	6.75625	7.64946	6.89913	CLM75_RS03120	6.17088	7.39299	6.61338	7.00301	6.6239	5.85876	7.08257	6.45631	6.52647	6.52906	6.33537	6.39061	6.40748	6.57841	7.44224	7.1075	6.18589	6.75161	7.17622	7.04247
	CLM75_RS03125	6.63668	6.71068	6.66001	6.85459	6.54828	7.75897	7.2257	6.78187	6.90901	6.67268	6.22846	6.85969	7.39671	7.1564	6.57987	6.73254	6.91592	7.20587	7.61999	6.51943	CLM75_RS03125	6.09252	7.12976	6.68416	6.59166	6.59659	5.681	6.76729	6.44778	6.20144	6.24402	6.2326	6.45045	6.13005	6.22475	7.03098	6.58916	5.96211	6.54459	6.52001	6.80331
	CLM75_RS03130	6.46593	7.28288	6.63187	5.89387	6.65745	5.74172	7.24856	6.51552	7.18087	6.03291	6.50856	6.68097	6.86053	6.28776	6.73551	7.13268	6.52631	7.34393	5.74432	7.03377	CLM75_RS03130	6.18514	5.75834	6.11429	5.44366	6.0896	6.47729	5.20234	5.8799	6.0636	6.00704	6.18735	5.82381	6.02129	6.07665	5.25713	5.39224	6.18694	5.95404	5.37783	5.77756
	CLM75_RS03135	10.8511	10.4524	10.3381	10.205	10.8381	9.81363	10.2067	10.4981	10.4774	10.0632	10.8691	10.4655	10.2402	10.2184	10.9382	10.3375	10.7132	10.3603	9.65226	10.8116	CLM75_RS03135	9.24927	8.82767	9.49832	8.73944	8.5431	10.0697	8.09841	9.71105	9.78317	8.67178	9.28467	9.02855	9.61784	9.60651	9.1792	8.51977	10.2004	9.20843	9.41372	8.65431
	CLM75_RS03140	7.301	8.18016	8.00119	7.6597	7.32017	7.69834	8.14006	7.97802	8.06164	7.84108	7.52535	8.32184	8.1249	7.94047	7.52255	7.91639	7.31908	8.31973	7.72535	8.46291	CLM75_RS03140	8.63271	8.65042	8.86351	9.00612	8.86025	8.60388	8.94327	8.91782	8.98711	8.9698	8.91265	8.97062	9.08592	8.7401	8.69469	8.90574	8.90979	8.80314	8.90665	8.94926
	CLM75_RS03145	6.1191	6.69819	6.50876	6.15005	6.3198	5.83728	6.5231	6.38457	6.69932	6.19515	6.43493	6.70804	6.55442	6.28814	6.26764	6.50276	5.8708	6.77771	5.94958	6.84503	CLM75_RS03145	6.85553	6.78429	6.88945	6.99025	7.04596	6.74802	7.08114	6.87244	6.98743	7.06651	6.89859	7.09257	7.02291	6.87265	6.655	7.03036	7.07318	7.06825	7.03713	7.01789
	CLM75_RS03150	4.94164	5.50691	5.0824	5.13495	4.96765	5.55756	5.79068	4.9647	5.53746	5.2389	4.71686	5.2133	5.66355	5.20844	5.04091	5.6008	4.79837	5.90156	5.48802	5.1371	CLM75_RS03150	5.04138	5.24612	5.05405	5.12988	4.93146	4.69032	5.19312	4.94674	5.09361	4.83485	5.09783	5.07671	4.62481	5.10388	5.27229	5.07209	4.91728	5.04632	5.22076	5.05384
	CLM75_RS03155	8.27871	7.70379	8.07408	7.7607	8.13337	8.11958	7.53639	8.08635	7.72938	7.9116	8.42597	7.45365	7.94959	7.98671	8.19967	7.58969	8.1626	7.58437	8.23589	7.76531	CLM75_RS03155	8.26158	8.46264	8.58863	8.5833	8.54713	8.39806	8.48671	8.69881	8.61783	8.49311	8.67061	8.56423	8.61944	8.30481	8.56524	8.52827	8.62221	8.52639	8.5477	8.69987
	CLM75_RS03160	5.47474	5.12909	5.41015	4.98633	5.42572	5.06278	4.78668	5.02394	4.98565	4.88258	5.68777	5.06268	5.12921	4.98554	5.46292	5.16258	5.27075	5.1188	5.00768	5.16516	CLM75_RS03160	4.9481	4.85643	4.66722	4.91269	4.82084	5.05061	4.73503	4.93991	5.0244	4.76336	4.96424	5.01382	4.72809	5.01072	4.87048	4.75198	5.43204	4.89654	4.97664	4.53883
	CLM75_RS03165	5.14279	5.06875	5.0496	4.70235	5.12974	4.92738	5.12568	4.98299	5.11738	4.95807	5.36868	4.98578	5.04943	4.81482	4.98747	5.28812	4.85456	5.11521	4.89847	5.29237	CLM75_RS03165	6.2934	5.59747	5.82431	5.67738	5.59795	6.5705	5.565	5.93742	5.91441	5.80571	5.85551	6.12746	6.28486	6.15882	5.54312	5.70721	6.45224	5.88193	5.67737	5.36641
	CLM75_RS03170	8.9565	9.10465	8.9919	8.71858	9.03159	8.47668	8.945	8.93703	9.0002	8.8416	9.25543	9.20361	9.02613	8.83801	8.93981	8.98925	8.86184	9.24326	8.52721	9.49703	CLM75_RS03170	8.99023	8.58871	8.64823	8.78898	8.68137	9.107	8.79541	8.79362	8.81946	8.83198	8.81837	8.88385	9.0548	8.852	8.56562	8.79926	9.20048	8.78085	8.72847	8.7713
	CLM75_RS03175	7.17117	6.43543	6.59479	6.24869	6.91692	6.37313	6.48857	6.70959	6.50206	6.15673	6.76669	6.84104	6.46245	6.47076	6.57488	6.60447	7.1635	6.37025	6.07576	7.02641	CLM75_RS03175	6.57959	6.53576	6.79809	6.35166	6.50878	6.63091	6.39406	6.76233	6.65616	6.55121	6.60044	6.75862	6.92728	6.60483	6.59445	6.42963	6.76977	6.53213	6.32521	6.45172
	CLM75_RS03180	6.27015	6.36407	6.38506	5.99843	6.28658	5.86132	6.07617	5.99815	6.38386	6.00671	6.55995	6.25438	6.3207	6.04496	6.2129	6.23787	5.92475	6.33186	5.96131	6.35211	CLM75_RS03180	6.07914	5.7347	5.74944	5.56487	5.75168	6.26843	5.59531	5.86195	5.91763	5.57613	5.9009	5.98617	5.83847	5.9869	5.53057	5.55257	6.24869	5.8121	5.57591	5.37148
	CLM75_RS03185	4.21508	4.67895	4.75634	4.93674	4.45962	5.11487	5.30304	4.52559	4.76268	4.70634	4.27286	4.81847	4.82507	4.67464	4.6388	4.63612	4.55236	4.96165	4.83997	4.75598	CLM75_RS03185	3.35776	3.93621	3.44406	3.69554	3.70046	2.97939	3.58741	3.44207	3.43167	3.21285	3.27012	3.50998	3.23495	3.51404	3.89795	3.55611	3.49324	3.14807	3.45724	3.68223
	CLM75_RS03190	5.94064	6.06821	6.27833	6.07755	6.15458	6.01676	6.182	5.88948	6.14913	6.23758	6.10772	6.17139	5.94355	5.8756	6.04539	6.02708	5.92106	6.03081	5.83889	6.51594	CLM75_RS03190	5.61627	5.73219	5.44406	5.7363	5.56452	5.49153	5.43246	5.59888	5.79581	5.57166	5.68104	5.29407	5.08008	5.7062	5.73046	5.53522	5.92476	5.65534	5.93884	5.46457
	CLM75_RS03195	4.98897	5.2714	5.27111	5.13579	5.1435	4.53683	5.25794	5.29984	5.27058	5.43989	5.19956	5.33363	5.01764	4.8086	4.82469	4.85427	4.86131	5.10874	4.40948	6.0915	CLM75_RS03195	7.13782	6.34403	6.80853	6.97249	6.43053	7.10131	6.51158	6.97567	7.07251	7.0681	7.00371	6.71048	7.11047	6.92511	6.54536	6.87448	6.92409	6.65688	6.84077	6.30839
	CLM75_RS03200	6.9359	5.95916	6.50456	6.36357	6.79828	5.56166	5.8779	6.29279	6.00681	6.66526	6.73104	6.53693	5.57706	5.91236	6.67269	6.17869	6.68397	5.945	5.29024	7.05829	CLM75_RS03200	7.80858	6.74164	7.4473	7.57462	7.40423	8.00783	7.23701	7.7492	7.69934	7.51585	7.64654	7.3065	7.34697	7.86756	6.92822	7.47521	7.78788	7.32116	7.37634	7.20796
	CLM75_RS03205	9.74831	8.49543	8.87895	8.4132	9.79407	7.75659	8.28735	8.36123	8.54991	8.24658	9.91794	8.39534	7.95908	7.79909	9.44354	8.71413	9.45567	8.29872	7.24704	9.3807	CLM75_RS03205	8.64968	8.15898	8.46567	8.15093	8.72832	8.83331	8.01059	8.51496	8.60525	8.38094	8.62903	8.34567	8.41279	8.76807	8.02396	8.13751	8.76692	8.61629	8.14565	8.43354
	CLM75_RS03210	8.58874	8.42823	8.24394	7.58522	8.67102	6.57359	8.47476	7.36913	8.61803	7.7343	8.78034	8.13041	7.87518	6.94321	8.36069	8.27067	8.71295	8.33221	5.99078	9.07058	CLM75_RS03210	8.51624	7.7698	8.11544	7.86722	8.15144	8.69717	7.68118	8.21138	8.26464	8.15443	8.18767	8.03899	8.0736	8.49587	7.40918	7.86871	8.36542	8.05404	7.77835	8.05324
	CLM75_RS03215	8.49572	6.50088	7.37349	7.40499	8.43802	6.26538	5.95148	6.98832	7.02476	7.10561	8.40599	6.74491	5.89112	6.28028	8.20392	6.83699	8.10545	5.64893	5.11235	7.51462	CLM75_RS03215	7.5867	6.14033	7.04872	6.84413	6.88211	7.8614	6.65328	7.28416	7.22152	6.76501	7.18512	6.91522	7.15027	7.52511	6.3448	6.77503	7.43814	6.86875	6.67735	6.68137
	CLM75_RS03220	6.13568	5.53747	5.5005	5.18154	6.10443	5.28738	5.19603	5.32873	5.63746	5.0182	6.40645	5.418	5.12532	5.09959	5.78091	5.45438	6.28832	5.25268	4.693	6.01041	CLM75_RS03220	5.29813	4.94295	5.01524	4.26902	4.97684	5.57659	4.64322	5.01404	5.17127	5.08363	4.85106	4.8412	4.60082	5.44518	4.30424	4.5399	5.30991	5.20343	4.42521	4.91259
	CLM75_RS03225	9.40305	8.98303	8.98041	8.78353	9.35667	8.08391	8.99889	8.70236	8.92119	8.59067	9.56714	9.05569	8.30072	8.31334	9.20326	9.14854	9.46421	8.73991	7.47354	9.62168	CLM75_RS03225	9.01655	8.35658	8.81302	8.71552	8.90636	9.16228	8.45317	9.04752	9.0889	8.72281	8.98581	8.71082	8.80673	9.04706	8.32916	8.62969	9.15377	8.83041	8.61223	8.87385
	CLM75_RS03230	5.53974	5.70198	5.75784	4.94448	5.35451	4.34397	5.83693	4.73429	5.69311	5.39434	6.43594	5.56482	5.24594	4.2972	5.26264	5.42473	5.44845	5.38416	3.85727	6.24492	CLM75_RS03230	8.4062	7.25721	7.63499	7.12526	7.89649	7.78521	6.94377	7.65908	7.66961	7.96485	8.02907	7.60535	7.65575	7.90271	6.19966	7.05085	7.39964	7.61155	6.40165	8.04982
	CLM75_RS03235	5.52159	5.59987	6.34625	5.09812	5.35352	4.57925	5.60446	4.319	5.99608	5.9019	7.41343	5.1428	5.64467	3.83449	5.17799	4.81251	5.22736	5.33448	4.01411	6.39506	CLM75_RS03235	8.48187	7.43632	7.77741	7.16187	8.22347	8.04128	7.18812	7.79576	7.81533	8.12493	7.99637	7.8115	7.88162	8.17012	6.57318	7.25007	7.76377	7.8934	6.78261	7.98238
	CLM75_RS03240	4.05602	4.83649	4.70964	4.04428	3.75773	3.50157	4.49094	3.73044	5.17926	4.50136	5.26749	4.01276	4.96644	3.15575	3.8068	3.83965	3.73383	4.08511	2.94185	5.27039	CLM75_RS03240	6.27377	5.5316	5.90437	5.0414	5.93884	6.231	4.95048	5.92287	5.8033	5.79934	5.82586	5.51734	5.50532	6.16423	4.60302	4.91375	6.01755	5.74318	5.08276	5.74927
	CLM75_RS03245	4.69401	5.27404	5.04671	4.42511	4.27808	3.89733	4.92063	3.68967	5.83392	5.06862	6.05189	4.54591	5.61265	3.34835	4.24711	3.93529	4.4473	4.7122	3.18925	5.95006	CLM75_RS03245	7.59634	6.6949	6.94356	6.12922	7.35797	7.00015	6.25222	6.97121	6.93364	7.25655	7.12413	7.094	6.87073	7.2063	5.61625	6.30689	6.85562	6.93984	5.95913	7.18895
	CLM75_RS03250	5.26525	6.62997	6.13887	5.80685	5.45269	5.00472	6.37254	4.91114	7.5076	6.4511	6.66788	5.74175	6.97074	4.52569	5.26342	5.6008	5.54746	6.34171	4.31394	7.07977	CLM75_RS03250	8.35412	7.61915	7.76284	7.25204	8.11953	8.23744	7.28523	7.92579	7.92647	7.88169	8.03093	7.72028	7.69594	8.07738	6.847	7.24989	7.91489	7.80431	7.01812	7.99037
	CLM75_RS03255	6.20664	7.04046	6.64339	6.32072	6.08017	5.52223	7.01906	5.49268	7.87785	6.81625	7.15859	6.2379	6.87062	5.37221	6.01255	6.08558	6.27682	6.83199	5.02454	7.65851	CLM75_RS03255	8.79543	7.96977	8.13543	7.75186	8.39364	8.74312	7.55857	8.2965	8.34516	8.37987	8.32495	8.24039	8.33858	8.51235	7.28945	7.64359	8.33443	8.21941	7.41514	8.25005
	CLM75_RS03260	7.10827	6.69105	6.70053	6.559	7.01846	5.15794	7.03661	5.7614	7.45016	6.83093	7.83937	6.44742	6.33647	5.09192	6.54841	6.3612	7.15548	6.5596	4.54656	7.97925	CLM75_RS03260	8.8307	7.84621	8.26996	7.69796	8.27918	8.86854	7.60823	8.41103	8.45015	8.23095	8.43663	8.3048	8.243	8.70946	7.11539	7.62184	8.47519	8.17484	7.37553	8.2383
	CLM75_RS03265	9.04086	7.76552	8.19799	8.06615	9.03413	7.09101	7.68326	7.42203	8.12433	8.17784	9.64048	7.57359	7.45489	6.77908	8.65232	7.78178	8.72476	7.68932	6.46362	9.21443	CLM75_RS03265	9.41021	8.18806	8.4876	8.13993	8.71811	9.3368	8.04321	8.79131	8.84121	9.02801	8.82587	8.82655	8.73415	9.06796	7.47946	8.13232	9.02116	8.68445	7.8375	8.7002
	CLM75_RS03270	10.8154	9.20098	9.67072	9.28874	10.9457	8.02102	8.51829	8.61983	10.0992	8.67676	11.6288	7.90462	8.81922	7.82722	10.586	8.17594	10.9868	8.33043	6.71668	10.0863	CLM75_RS03270	9.78437	9.31142	9.28503	8.50255	10.1922	9.57349	8.92409	9.54807	9.43139	9.5373	9.86212	9.68541	9.75221	9.54413	8.0891	8.79002	9.56449	9.71973	8.28642	10.1379
	CLM75_RS03275	9.62596	7.52029	8.12202	7.97827	9.4256	6.87266	7.5716	7.44506	8.37764	7.40321	9.78965	6.91757	7.55962	6.75121	8.95735	7.11445	9.48734	7.12461	5.65833	8.74929	CLM75_RS03275	9.22525	8.4707	8.91141	7.93817	9.0872	9.15044	8.24425	8.93051	8.80481	8.88121	9.04408	9.02145	8.93399	9.13098	7.69945	8.02705	8.84496	8.84433	7.5216	9.15755
	CLM75_RS03280	7.01495	6.97154	6.7395	6.73221	6.868	6.04242	7.26741	6.34523	7.48775	6.76921	7.56746	6.53801	7.00427	5.82662	6.97563	6.51372	7.1798	6.8051	5.08045	7.74968	CLM75_RS03280	8.89659	7.81738	8.49143	8.32483	8.37696	9.1467	7.97549	8.64646	8.63094	8.38584	8.5041	8.39547	8.61196	8.79014	7.51893	8.14667	8.75598	8.32336	7.95093	8.38674
	CLM75_RS03285	4.04396	3.97803	4.08703	3.59835	3.75474	3.6655	3.91237	3.53537	3.85805	3.95398	4.10239	3.87626	3.70067	3.38508	3.77235	4.00509	3.12257	3.89257	3.45448	4.1649	CLM75_RS03285	4.69254	4.34516	4.29841	4.00609	4.3901	4.45536	4.11953	4.1652	4.21681	4.5644	4.54905	4.54578	3.6863	4.0572	3.89795	4.03559	4.20806	4.40374	3.73474	4.30092
	CLM75_RS03290	3.27936	3.87042	4.06151	3.55855	3.19134	3.36746	3.86464	3.42122	4.27761	3.96491	4.28929	3.92321	4.18174	3.36542	3.2566	3.3205	3.51641	3.78662	3.18526	5.21682	CLM75_RS03290	8.54793	7.53843	8.02771	7.93447	8.06588	8.47278	7.83286	8.08518	8.12683	8.26648	8.29032	8.27746	8.15616	8.13271	7.09741	7.84579	8.19892	7.93784	7.58853	7.91685
	CLM75_RS03295	4.95072	4.88741	5.45875	5.56657	5.01585	4.75188	5.05599	5.04149	5.4719	5.82632	5.75923	5.40978	5.04533	4.64466	4.76352	4.38825	4.8468	4.80053	4.21358	6.49595	CLM75_RS03295	10.3686	9.47713	10.0821	10.1528	10.0627	10.3078	10.0256	10.1787	10.2011	10.4012	10.2986	10.1812	10.0893	10.072	9.22887	10.073	10.1128	9.8133	9.64818	9.91674
	CLM75_RS03300	5.73844	5.54624	5.88695	5.82111	5.76917	5.41601	5.7184	5.43407	5.89099	5.72601	6.1776	5.62285	5.80791	5.16279	5.64054	5.33111	5.67009	5.47027	4.90577	6.669	CLM75_RS03300	7.73078	7.34311	7.40372	7.51233	7.50111	7.59358	7.31771	7.68302	7.75754	7.85829	7.69233	7.48879	7.73228	7.54631	6.988	7.41057	7.6111	7.42294	7.42774	7.59508
	CLM75_RS03305	7.75802	8.53017	8.33107	8.25452	7.86791	8.12224	8.33918	8.15132	8.37902	8.20838	8.02612	8.3703	8.23643	8.27668	7.88519	8.34677	7.88322	8.35297	8.1784	8.35242	CLM75_RS03305	8.46817	8.55903	8.39794	8.40488	8.34688	8.56146	8.47847	8.48933	8.4933	8.50901	8.45403	8.45881	8.5847	8.41361	8.24375	8.38085	8.64726	8.54803	8.36464	8.46016
	CLM75_RS03310	3.72539	4.30047	4.00908	3.86421	4.08945	3.86451	4.60107	4.50404	4.27465	4.22749	3.98623	4.24959	4.21137	4.0731	3.44337	4.36189	3.47927	4.31117	3.9187	4.37341	CLM75_RS03310	4.65532	4.71605	4.63913	4.76739	4.55805	4.72955	4.67384	4.82516	4.80627	4.78673	4.47458	5.01382	4.56407	4.94028	4.55423	4.77087	4.97444	4.76114	5.03312	3.98092
	CLM75_RS03315	4.52207	5.24471	5.02634	4.69204	4.44487	4.64643	5.2937	4.84126	5.26315	4.86712	4.76038	4.95384	5.32486	4.89244	4.64595	4.98296	4.38574	5.27662	4.73595	5.26762	CLM75_RS03315	5.64049	5.48114	5.96842	5.61817	5.58891	6.48692	5.26277	5.91089	5.80926	5.39201	5.67725	5.45065	5.83847	5.82726	5.56791	5.60506	6.10584	5.73553	5.65849	5.39988
	CLM75_RS03320	5.17522	5.22641	5.12408	4.87935	5.50251	4.76735	5.25867	5.13791	5.38552	5.04134	5.16678	5.23074	4.99084	5.01739	5.30015	5.27737	5.02403	5.3565	4.80135	5.27132	CLM75_RS03320	5.28441	5.0129	4.92158	4.9865	4.90419	5.21926	4.78147	5.03769	5.0244	5.00833	5.20568	4.9054	4.21485	5.08115	4.79898	4.85903	5.15513	5.20065	4.81643	4.87975
	CLM75_RS03325	5.80785	5.86374	6.01656	6.14166	5.75728	5.92796	6.09904	5.85302	6.01036	6.16939	5.76405	6.14121	5.76193	5.77964	5.59445	5.90191	5.50559	6.04444	5.78778	6.28292	CLM75_RS03325	5.29392	5.19658	5.17734	5.30401	5.01633	5.26391	5.02067	4.97374	5.03207	4.80719	4.95332	4.92903	5.27459	5.29804	5.3742	5.12947	5.51479	5.06476	5.12388	4.95598
	CLM75_RS03330	4.23644	3.49352	3.34687	3.43487	4.05587	3.247	3.64037	3.68329	3.7962	3.15114	2.95122	3.28658	3.08468	3.21031	4.01819	3.30104	4.211	3.42146	2.81317	3.40692	CLM75_RS03330	4.74586	4.25706	4.69204	3.9345	4.32383	4.86757	3.86133	4.63904	4.28684	4.94972	4.67981	4.85248	4.9906	4.48591	3.52012	4.31578	4.5166	4.21853	3.92058	4.32551
	CLM75_RS03335	5.52159	6.46463	5.9965	5.85179	5.42007	6.09947	6.68136	6.0274	6.38455	6.31912	5.65874	6.46055	6.32352	5.91478	5.44115	6.16665	5.5294	6.63936	5.83507	6.96389	CLM75_RS03335	6.12367	5.93871	6.09839	5.52218	5.8305	6.03023	5.82672	5.91438	6.10941	6.26081	5.91304	5.87778	6.05699	6.14557	5.49223	5.55659	5.91464	5.84448	5.5876	5.64288
	CLM75_RS03340	6.08478	7.27168	6.50351	7.4326	5.52985	7.2411	7.34442	7.33598	7.25521	7.87713	6.43359	7.82937	7.22337	7.32784	5.69444	7.05689	6.45254	6.90146	6.90604	8.15967	CLM75_RS03340	7.10308	6.62938	7.0407	7.46147	6.62684	7.07453	7.36423	7.14212	7.06713	6.54894	6.70604	7.19843	6.32934	7.13832	7.41687	7.54202	6.8181	6.75066	7.77421	6.51723
	CLM75_RS03345	6.8749	6.60343	7.21984	6.88231	6.86627	6.61988	7.04135	7.16347	6.83154	7.14673	7.16204	7.24443	7.11291	7.00986	7.03746	6.8054	6.82164	6.78337	6.88773	7.20137	CLM75_RS03345	7.65676	7.39272	7.62016	7.36484	7.76197	7.68784	7.44912	7.56085	7.62397	7.83013	7.70308	7.74408	7.84379	7.5771	6.89432	7.40054	7.65167	7.49703	7.28813	7.58165
	CLM75_RS03350	5.86929	5.70296	5.94626	6.00723	5.83569	5.61723	6.18278	5.8881	5.99758	6.15275	6.10223	6.22122	6.17919	6.11434	6.16432	5.66753	6.13039	5.61228	5.43518	6.2608	CLM75_RS03350	6.04389	5.74054	6.25234	5.84233	5.57473	6.53701	5.81389	6.05833	6.01025	5.55965	5.8952	5.86336	6.09613	6.01287	5.73867	5.76788	5.96701	5.76715	5.86113	5.61749
	CLM75_RS03355	3.92009	4.37987	4.46557	4.13332	3.58015	4.28401	4.53674	4.22335	4.3049	4.3732	3.82956	4.4779	4.49849	4.361	3.75039	4.32062	3.51151	4.25886	4.36779	4.55706	CLM75_RS03355	3.89076	4.30516	4.25835	3.83653	4.2	4.10695	3.89421	4.10541	4.01838	4.29424	4.15848	3.7166	3.97464	3.69176	3.7433	3.98878	3.78203	4.13955	4.11628	4.15174
	CLM75_RS03360	4.89406	4.44813	4.66515	4.10252	4.75394	4.06077	4.35522	4.63371	4.48867	4.43303	4.8737	4.5714	4.28752	4.06616	4.35871	4.37591	4.64918	4.67081	4.00507	4.95508	CLM75_RS03360	4.22931	4.17929	3.89728	4.19979	3.68923	4.09537	3.96712	4.14554	4.26388	4.13746	3.80265	4.19174	3.77473	3.99602	4.43801	4.00735	4.43041	4.11421	4.14521	4.12397
	CLM75_RS03365	6.9185	7.00691	7.07324	7.55046	6.79936	7.87995	7.29342	7.42395	7.20125	7.64376	6.62438	7.19507	7.28388	7.5369	6.9537	7.0818	7.00158	7.064	7.7876	6.86288	CLM75_RS03365	5.87537	6.78732	6.39059	6.65482	6.3679	6.00467	6.73679	6.38992	6.27544	6.2774	6.26767	6.23648	6.34025	6.25553	6.89921	6.67667	6.20989	6.44567	6.66031	6.47781
	CLM75_RS03370	5.46934	5.2661	5.47388	5.11964	5.24703	5.37853	5.3173	5.27673	5.46587	5.14056	5.55321	5.35702	5.1031	5.10129	5.30015	5.09263	5.35107	5.37579	4.91183	5.95178	CLM75_RS03370	5.75278	5.63873	5.66629	5.49754	5.67116	5.86616	5.38582	5.91515	5.93908	5.81711	5.74036	5.90077	5.97538	5.37482	5.72771	5.57764	6.1323	5.78023	5.61561	5.84836
	CLM75_RS03375	4.76921	4.84983	4.65191	4.30549	4.75095	4.48451	4.74616	4.48949	4.54943	4.42601	4.46266	4.75129	4.67544	4.66318	4.31749	4.62833	4.6647	4.81031	4.26557	4.7937	CLM75_RS03375	5.79431	5.02595	5.36823	5.1636	5.58588	5.83632	4.94735	5.3577	5.51799	5.19456	5.42154	5.47857	5.34848	5.30085	4.96216	5.02895	5.34048	5.17542	4.94582	5.009
	CLM75_RS03380	7.16645	7.89129	7.55031	7.46676	7.12437	6.92028	7.80926	7.41628	7.82227	7.57595	7.43642	7.87785	7.67664	7.43346	7.18287	7.64008	7.41119	7.69449	6.67206	7.95089	CLM75_RS03380	7.80452	7.47851	7.94165	8.07092	7.66374	8.05168	7.68588	8.05002	8.08414	7.7505	8.00565	7.67527	7.87913	7.92203	7.56276	7.9745	8.00889	7.65022	7.93107	7.60444
	CLM75_RS03385	4.05602	4.65077	4.47849	4.77794	3.83894	4.51725	4.77123	4.60025	4.85525	4.76866	4.0768	4.77342	4.76806	4.78659	3.97718	4.65668	4.05819	4.7552	4.85136	4.58106	CLM75_RS03385	3.7627	3.77475	3.36051	3.34986	3.38477	3.69095	3.73268	3.46128	3.59011	3.55282	3.57311	3.3913	3.83767	3.48465	3.90769	3.43164	3.1142	3.76919	3.68997	3.47174
	CLM75_RS03390	5.34114	5.94307	5.82847	6.27617	5.0121	6.47702	6.36604	6.11351	6.11512	6.41812	5.30103	6.34646	6.28978	6.21469	5.15895	5.91796	5.76367	6.04482	6.09505	6.25008	CLM75_RS03390	5.98379	5.89597	5.77805	5.97602	5.7925	6.1187	5.9175	5.93666	5.95216	5.96214	5.77535	5.81692	6.00767	5.81353	6.0581	5.93019	6.00329	5.6641	5.7614	5.626
	CLM75_RS03395	4.34267	4.8683	4.70964	4.25503	4.52769	4.25391	4.7702	4.7219	4.84865	4.59581	4.49394	5.12426	4.54189	4.42888	4.48375	4.84646	4.32004	4.93507	4.08442	5.04411	CLM75_RS03395	4.89077	4.57275	4.6893	4.0373	4.67658	5.03655	4.21112	4.81524	4.53605	4.89582	4.99806	4.88359	5.18868	4.62488	4.09843	4.38326	4.7308	4.62143	4.26797	4.5054
	CLM75_RS03400	5.00648	5.28259	5.48031	5.77138	4.74343	5.76443	5.37635	5.73004	5.41086	5.96829	5.01694	5.65897	5.46161	5.63053	4.87629	5.42248	4.80539	5.60566	5.36982	5.64028	CLM75_RS03400	4.77633	4.85026	4.87055	4.82473	4.90257	4.94381	4.47949	4.85209	4.81123	4.66591	4.57576	4.63728	4.06509	4.85479	4.95278	4.8469	4.74516	4.55487	4.85104	4.68988
	CLM75_RS03405	4.94034	5.31245	6.61784	5.24638	4.52419	4.75307	5.2205	5.01761	5.30767	6.21461	7.0258	5.99661	5.89797	5.31112	4.5075	4.91098	4.65474	4.76438	4.90577	6.06515	CLM75_RS03405	9.05045	7.86944	8.65281	9.04084	8.39637	9.09324	8.44556	8.99092	8.95476	8.72096	9.02202	8.45715	8.78494	8.91407	8.04343	8.87021	8.85856	8.39311	8.64058	8.43657
	CLM75_RS03410	4.53936	4.82212	5.71756	4.7736	4.49763	4.51161	4.7023	4.90704	5.01428	5.66177	6.53386	5.74828	5.14336	4.89929	4.37602	4.36346	4.6199	4.48672	4.91665	6.22459	CLM75_RS03410	9.16629	7.60652	8.57294	8.76371	8.2272	9.14436	8.23433	8.93934	8.84979	8.57294	8.89123	8.49918	8.86517	8.91705	7.91526	8.53621	8.97137	8.23113	8.48417	8.35786
	CLM75_RS03445	6.21097	6.60868	6.31419	6.51712	6.15514	6.72417	6.67695	6.45083	6.67544	6.30557	6.3868	6.81594	6.54087	6.54506	6.22569	6.33991	6.48131	6.62153	6.74273	6.92983	CLM75_RS03445	6.86513	6.76169	7.01906	6.62028	7.04229	7.05623	6.70702	6.98897	6.88884	6.93441	6.98811	7.02442	7.32882	6.93917	6.82403	6.87815	7.11246	6.81107	6.70854	6.9568
	CLM75_RS03450	6.00053	6.47729	6.14698	6.07931	6.02546	6.40923	6.11381	6.06406	6.42153	6.01286	6.04135	6.0737	6.19781	6.24613	6.21771	5.95785	6.17868	6.28031	6.54691	6.34337	CLM75_RS03450	5.83902	5.85769	6.07814	5.9053	6.04107	6.15634	5.93578	6.10555	5.94767	5.93567	5.97068	6.02456	5.53094	6.00254	5.92291	5.95866	6.0618	5.84685	5.97278	5.90424
	CLM75_RS03455	7.72497	7.5175	7.64188	7.49603	7.76572	7.58018	7.29864	7.76489	7.56788	7.45732	7.73471	7.49141	7.62987	7.63077	7.854	7.40459	7.60295	7.67564	7.53014	7.57301	CLM75_RS03455	7.75947	7.58209	7.72208	7.62958	7.60939	7.85783	7.60699	7.7012	7.70135	7.58265	7.64169	7.70232	7.82579	7.70049	7.5819	7.6522	7.97183	7.6966	7.63006	7.66969
	CLM75_RS03460	8.78168	7.39816	8.43492	8.24769	8.82258	8.46121	7.61278	8.73201	7.10195	8.30522	8.90803	7.99804	7.57086	8.49622	8.81122	8.18282	8.71121	7.52565	8.53047	7.91726	CLM75_RS03460	7.19842	7.53531	7.42424	7.83317	7.49252	7.28052	7.67291	7.53389	7.50245	7.50884	7.5274	7.3325	7.62931	7.30455	7.74432	7.70912	7.37816	7.44715	7.72211	7.5361
	CLM75_RS03465	5.29303	4.18169	5.24867	5.83471	5.39631	5.60469	4.60921	5.59304	4.99406	5.84419	5.42182	4.34874	5.30209	5.41724	5.48635	4.57668	5.31849	4.68442	5.28278	4.17676	CLM75_RS03465	3.89909	4.87552	3.91613	4.27278	4.02336	3.61188	4.26743	3.82642	3.83379	4.23507	4.00367	3.9612	4.01151	3.49451	4.37619	4.20606	3.75392	3.94537	3.99105	4.04155
	CLM75_RS03470	5.74888	5.81695	6.09971	6.49159	5.85046	6.85077	6.26597	6.27382	6.18209	6.80413	5.67305	5.76495	6.44644	6.40039	6.02998	5.82282	5.7356	6.15118	6.64396	5.54511	CLM75_RS03470	5.11832	6.21687	5.43755	5.48951	5.56144	5.01007	5.6976	5.12258	5.19575	5.37155	5.32068	5.19126	4.97202	5.08278	5.82347	5.50881	4.66891	5.37413	5.52931	5.85803
	CLM75_RS03475	7.02573	7.0795	7.00013	7.15984	7.17496	7.5416	7.25172	6.99188	7.02447	7.17551	6.96548	6.92829	7.11422	7.11663	7.00838	7.18713	6.8748	7.3646	7.66496	6.85951	CLM75_RS03475	6.19983	6.59409	6.18691	5.90288	6.39754	5.98388	6.16462	5.93971	6.06526	6.35153	6.26136	6.26292	6.07015	6.2016	6.05153	5.92042	6.04217	6.37765	6.04767	6.15219
	CLM75_RS03480	5.73694	5.90267	5.63922	5.54127	5.62696	5.88715	5.63721	5.79801	5.63669	5.5617	5.53828	5.43082	5.87809	5.80801	5.5551	5.77132	5.86553	5.71244	6.13391	5.47798	CLM75_RS03480	7.61796	6.86884	7.44466	7.19931	7.29574	7.65568	7.14914	7.32449	7.39506	7.30366	7.59976	7.29539	7.50396	7.52572	6.84065	7.29026	7.44958	7.24056	6.97785	7.29859
	CLM75_RS03485	5.01515	5.45954	6.02612	6.03559	4.84382	5.25736	5.24009	5.39851	5.56594	6.40547	6.20778	6.47525	4.79929	5.46356	4.44872	4.34932	5.32827	4.91707	4.81434	7.49206	CLM75_RS03485	10.8543	9.40038	10.2827	10.5	10.0347	10.8319	10.4792	10.4974	10.306	10.5946	10.3488	10.307	10.3304	10.3934	10.097	10.564	10.3999	10.167	10.1784	9.92308
	CLM75_RS03490	5.67572	5.80467	5.85347	6.22902	6.0724	6.60836	6.29543	6.10041	6.01863	6.18739	4.88946	6.06699	5.5259	6.11308	6.16391	6.36589	5.93209	5.89948	5.9108	5.87377	CLM75_RS03490	5.62383	5.69053	5.51609	5.61004	5.51128	5.56404	5.41444	5.65092	5.63449	5.48065	5.52953	5.41307	4.75006	5.52916	5.56176	5.56857	5.52481	5.58114	5.64682	5.47403
	CLM75_RS03495	5.51199	5.66723	5.64018	5.40275	5.49358	5.72353	5.67423	5.32361	5.65119	5.44554	5.57956	5.72765	5.50113	5.41246	5.79761	5.8302	5.78969	5.38118	5.41912	5.54129	CLM75_RS03495	5.94207	5.61394	5.88955	6.17202	5.8047	6.17112	5.81389	6.03287	5.98194	5.89563	5.94649	5.75578	5.91829	5.84182	6.25605	6.05918	6.03284	5.80298	5.85238	5.63024
	CLM75_RS03500	5.59783	5.72244	5.72028	5.22668	5.28272	5.41147	5.78402	5.45481	5.73527	5.48151	5.56061	5.64002	5.77025	5.43015	5.48036	5.69698	5.56115	5.71529	5.30227	5.90025	CLM75_RS03500	6.26144	5.66618	5.86732	5.72744	5.80557	6.34663	5.5496	6.09534	6.14834	5.94493	6.06579	5.79488	5.98003	5.97021	5.44951	5.55716	6.16148	5.83794	5.70576	5.75316
	CLM75_RS03505	5.94907	6.02102	5.89259	5.5291	5.83357	5.43476	5.76283	5.69798	5.93875	5.27302	6.00291	6.1504	5.65189	5.5954	5.88485	5.98807	5.97897	5.96505	5.40029	5.98308	CLM75_RS03505	5.40924	5.14905	5.33797	4.64684	5.23042	5.58834	4.37852	5.31023	5.50213	5.12088	5.54417	5.27576	5.04495	5.30646	4.54177	4.64391	5.91845	5.17542	4.68781	4.96942
	CLM75_RS03510	4.44894	4.26771	4.07858	4.32044	4.32111	3.91453	3.64037	3.95614	4.08977	4.19071	3.95847	4.38512	3.78847	3.8728	4.16151	3.95617	4.51493	3.85868	3.9211	4.36133	CLM75_RS03510	5.05013	4.75121	4.28034	4.41363	5.04453	4.7457	4.51587	4.55114	4.55982	5.06888	4.77508	5.03575	4.04745	4.53214	4.30424	4.32119	4.30813	4.69692	3.70437	5.31646
	CLM75_RS03515	5.39246	5.16867	5.48885	4.78981	5.4229	5.40007	5.18363	5.1838	5.36483	5.20703	5.39308	4.9683	5.2507	5.40009	5.43978	5.1188	5.16011	5.23496	5.69461	4.87483	CLM75_RS03515	4.40534	4.37229	4.00464	4.39483	4.28206	4.4356	4.43325	4.19991	4.13847	3.94317	4.2066	4.39046	4.24611	4.32937	4.71823	4.16904	4.43395	4.32094	4.29539	3.82211
	CLM75_RS03520	5.40383	5.1849	5.4079	4.97787	5.64804	5.12321	5.01197	5.26611	5.27108	4.9935	5.30324	5.2133	5.08854	5.3538	5.81252	5.5006	5.25692	5.35285	5.25542	5.15521	CLM75_RS03520	4.44571	4.2109	4.17081	4.19189	4.27457	4.55877	4.0886	3.94638	4.27684	4.18122	4.47894	4.19528	4.67163	4.15685	3.7649	4.1326	4.14017	4.52855	4.02585	3.77187
	CLM75_RS03525	3.90417	4.12428	3.80208	3.77369	3.85576	3.77551	3.93658	3.76104	3.81937	3.52558	3.70591	3.99717	3.56573	3.70638	3.85903	4.12058	3.81953	4.02221	3.54141	4.21753	CLM75_RS03525	4.08827	3.85235	3.9531	3.9345	3.96555	4.45234	3.76504	4.15606	4.2302	4.1773	4.06876	3.83955	3.97464	4.1159	2.98856	3.84601	4.55621	3.97166	3.98263	4.03305
	CLM75_RS03530	2.57104	3.0265	1.98178	1.80856	1.71718	1.42188	2.8356	2.12685	2.90752	2.55043	2.49057	2.65266	2.04336	2.33143	2.24747	2.15669	1.74771	3.17114	2.34667	2.80802	CLM75_RS03530	3.97462	3.64725	3.59498	3.33917	3.72268	3.70626	3.35675	3.87179	3.65555	4.08397	3.76029	3.71166	4.46124	3.65705	2.87395	3.29265	4.07348	3.82794	3.44014	3.34688
	CLM75_RS03535	3.58594	3.06971	3.34217	2.49166	3.05716	2.90793	3.11557	3.49952	2.9891	2.86506	3.17032	3.33202	2.90898	3.05765	3.07419	3.51599	3.27483	3.23328	2.92278	3.24359	CLM75_RS03535	2.94541	2.83639	2.99876	3.02463	2.87159	3.5425	2.07466	3.13963	3.03707	2.94391	2.74841	3.08211	2.84342	2.91565	3.0602	2.96317	3.08742	2.87379	2.51459	2.34812
	CLM75_RS03540	4.02935	4.25706	4.27641	4.01149	3.99642	4.10077	4.33014	4.08024	4.40827	4.04264	4.09731	4.5024	4.34657	4.38072	4.31	4.48482	4.19581	4.37009	4.27876	4.28118	CLM75_RS03540	3.94273	3.64903	3.60663	3.54239	3.76253	4.0116	3.55075	3.77448	3.69687	3.63523	3.84718	3.74107	2.80194	3.72985	3.45516	3.5584	3.97949	3.60811	3.57606	3.24744
	CLM75_RS03545	4.20212	3.79701	4.2005	3.93973	4.37657	3.83545	3.85099	4.26023	3.79895	4.0265	4.46661	4.18226	3.85567	3.9351	4.2154	4.0368	4.1077	3.88922	4.09723	4.22707	CLM75_RS03545	3.8455	3.85697	3.73955	3.67017	3.6317	3.85788	3.29898	3.57928	3.79025	3.56489	3.92595	3.83046	3.79601	3.95016	3.6535	3.79834	3.93009	3.64125	3.61576	3.62677
	CLM75_RS03550	3.31191	3.11462	3.46837	3.42661	3.67799	3.33268	3.12208	3.42122	3.31283	3.46527	3.85186	3.38569	3.4126	3.43714	3.43238	3.17133	3.3887	3.30046	3.23247	3.37639	CLM75_RS03550	3.10276	3.16658	3.25712	2.89435	3.38012	3.60372	2.69848	3.15282	3.25074	3.19743	2.98753	3.1927	3.38296	3.41364	3.12846	2.90673	3.32762	3.05277	3.03741	2.89988
	CLM75_RS03555	2.49511	3.02022	2.64024	2.49166	2.35227	2.58161	3.09917	3.28046	2.81292	2.87282	2.63317	3.08897	3.06858	2.45883	2.88562	2.91394	2.87437	3.10907	2.78177	3.28436	CLM75_RS03555	3.18229	2.74301	2.88378	2.68511	2.73984	3.16071	2.23729	2.82401	2.99236	2.77763	3.144	3.19978	2.47243	2.77704	2.95136	2.47851	3.06928	2.54069	2.5874	1.86369
	CLM75_RS03560	1.78645	2.18206	2.12006	2.32377	1.69241	2.03102	2.04944	2.45345	1.66804	2.16442	2.27944	2.57078	1.47133	2.58563	2.0531	2.49023	2.06762	1.82479	1.30089	2.62388	CLM75_RS03560	2.82814	2.21943	2.59303	2.39969	2.15742	3.03298	2.33635	2.73562	2.80617	2.10263	2.76993	2.03752	3.07001	2.6504	2.74944	1.94597	3.10533	2.19875	2.1259	2.09379
	CLM75_RS03565	5.04693	4.71828	4.78087	4.5496	4.91377	4.49741	4.57758	4.91522	5.32062	4.92176	4.99798	4.61495	4.65222	4.97724	5.07399	4.39592	4.99713	4.86425	5.15484	4.80776	CLM75_RS03565	5.15008	4.72871	4.84618	5.18764	4.53103	5.30219	4.90279	4.73948	4.63894	4.60294	4.97354	5.15164	5.54358	5.26384	5.16264	5.12097	5.29633	4.89081	4.99181	4.39687
	CLM75_RS03570	4.98897	5.59142	5.61213	5.84818	4.94686	5.62247	5.96739	5.55251	5.87807	5.98688	4.83961	5.752	5.91682	5.73492	4.98183	5.67132	5.01627	5.76462	5.45937	5.3941	CLM75_RS03570	4.9306	5.11924	4.55895	5.0964	4.75051	4.59074	5.03401	4.83665	4.75262	4.97707	4.89087	4.93752	4.72809	4.66255	5.0351	5.10225	4.29257	4.87116	5.11467	4.94015
	CLM75_RS03575	4.91408	5.59353	5.72209	5.34105	4.87304	5.2404	5.56558	5.35203	5.45981	5.64487	4.87864	5.42501	5.26018	5.6074	4.92709	5.52526	5.06805	5.59797	5.52563	5.4473	CLM75_RS03575	4.67486	4.75203	4.48986	4.67262	4.61259	4.74693	4.61784	4.75599	4.98456	4.67707	4.79969	4.7184	4.06509	4.72464	4.65021	4.6309	5.10259	4.83938	4.71548	4.67355
	CLM75_RS03580	2.85129	3.10575	3.28451	2.465	2.50227	2.62406	3.37469	2.87875	3.24601	2.90345	2.78838	3.32704	2.85994	3.03293	3.00911	3.2546	2.32373	3.37667	2.79756	3.13833	CLM75_RS03580	2.96141	2.91526	2.70022	2.67947	3.01649	3.34802	2.69848	2.5246	2.59234	3.2281	3.0416	2.82255	3.03463	2.80901	2.48886	2.8703	2.93549	2.64785	2.5469	2.11006
	CLM75_RS03585	4.84624	4.91306	4.97562	5.46731	4.96507	5.09142	5.27483	4.8006	5.32301	5.4082	4.82943	5.07759	5.24236	4.74806	4.7392	4.94794	4.80938	4.93669	4.70978	5.29509	CLM75_RS03585	5.45892	5.41065	5.33009	5.29574	5.24967	5.46102	5.2803	5.2841	5.18814	5.42217	5.50836	5.33805	4.67163	5.11512	4.86048	5.20674	4.9622	4.9831	5.01674	4.84615
	CLM75_RS03590	6.90255	6.63512	6.91719	6.54157	6.971	6.50035	6.5685	6.51417	6.65551	6.70673	6.90956	6.63739	6.45214	6.46879	6.779	6.91185	6.5673	6.56118	6.43236	7.02121	CLM75_RS03590	6.17431	5.69269	5.59863	6.15231	5.8288	6.25114	5.91029	5.96273	6.18319	6.07927	6.20193	5.93512	5.7702	6.11632	5.66015	6.04495	6.24364	5.80054	6.06928	5.69098
	CLM75_RS03595	5.78411	6.49834	6.38962	6.54348	5.76991	6.37973	6.58745	6.29331	6.51943	6.57796	5.94279	6.53962	6.45007	6.37252	5.99352	6.38988	5.72453	6.4662	6.44244	6.31771	CLM75_RS03595	5.63634	5.72294	5.66629	5.7424	5.56041	5.60952	5.74795	5.57556	5.4175	5.55814	5.57403	5.48873	5.6872	5.53992	5.69432	5.62924	5.27868	5.59812	5.78432	5.49121
	CLM75_RS03600	5.69359	5.5967	5.88453	5.37581	5.79629	5.51449	5.65359	5.82143	5.56997	5.59414	6.01868	5.71436	5.48504	5.61456	5.54938	5.78306	5.61978	5.68563	5.63436	5.88044	CLM75_RS03600	5.63717	5.29232	5.26817	5.48547	5.15483	5.56893	5.59731	5.39812	5.49598	5.49649	5.2637	5.20187	5.73757	5.45405	5.53999	5.62159	5.44617	5.26408	5.57311	5.25378
	CLM75_RS03605	6.67668	6.24726	6.67645	6.30727	6.69104	6.42545	6.14011	6.72092	6.23093	6.55061	6.58135	6.47018	6.30932	6.52621	6.5237	6.47155	6.46018	6.31196	6.51941	6.46847	CLM75_RS03605	6.0767	5.95961	5.88835	6.17603	5.76423	6.19528	6.04964	6.01493	6.08013	6.05808	5.98148	5.99536	5.88391	5.95689	5.82089	6.02023	6.16682	5.919	5.96725	5.72042
	CLM75_RS03610	6.25715	6.18756	6.04505	5.78276	6.16979	5.87016	5.7307	6.1596	6.14482	5.60194	6.01464	5.76771	5.82238	5.87063	6.20162	5.90406	6.15493	5.69383	5.66049	5.99486	CLM75_RS03610	4.68292	5.05906	5.04445	4.81832	4.81568	5.15284	4.86182	5.20212	5.09849	4.78415	5.17913	4.74526	4.4745	5.19139	5.10452	4.6948	4.98415	5.12653	5.06853	4.97831
	CLM75_RS03615	4.1513	4.42336	4.28379	4.47807	3.95278	4.3264	4.45271	4.57464	4.38745	4.46418	3.92253	4.3364	4.66298	4.3877	4.13125	4.49912	4.16027	4.6551	4.43661	4.4536	CLM75_RS03615	3.78684	4.03461	4.10251	3.80579	4.10736	4.22325	3.57123	3.82971	3.69687	3.61796	3.71664	3.99007	4.51357	3.85764	4.03761	3.6707	3.68412	3.60532	3.5872	3.92225
	CLM75_RS03620	3.9015	3.98611	3.85585	3.56107	4.06554	3.65274	4.23273	3.89675	3.96945	3.54352	3.68122	3.76283	3.96407	3.85276	3.96388	3.84414	3.87778	4.03441	3.68127	4.03191	CLM75_RS03620	3.9877	3.76986	3.84905	3.2882	3.72268	4.01365	2.93178	3.77789	3.57619	3.95239	3.93867	3.83501	4.32144	3.41883	3.25598	3.08897	3.57265	3.6467	3.03416	3.6603
	CLM75_RS03630	5.97535	5.01843	5.23732	4.78335	5.86438	3.9895	4.79384	5.06621	4.93103	4.5047	5.98605	5.19566	4.49849	4.65395	5.67999	5.08127	5.75126	4.69886	3.78521	5.76338	CLM75_RS03630	5.77181	5.22544	5.6649	5.04579	5.75976	6.04786	4.99664	5.59163	5.69262	5.69205	5.8862	5.55095	5.82818	5.91343	5.10875	5.05272	6.0526	5.66208	4.98002	5.35451
	CLM75_RS03635	2.52319	2.70881	2.37152	2.1738	2.62511	2.64997	2.25298	2.31183	2.57745	2.26219	2.41088	2.6123	2.55562	2.63808	2.32082	2.61627	2.50712	2.84747	2.41648	2.91103	CLM75_RS03635	2.62213	1.87546	2.29482	1.51994	1.92174	2.56364	1.47067	2.59198	2.40033	2.41406	2.0339	2.69808	1.81372	2.26876	0.827434	1.74334	2.69644	2.45631	1.7748	2.04385
	CLM75_RS03650	1.79798	1.90367	1.61157	0.792198	1.5342	1.24278	1.41651	1.70398	1.72688	1.41269	1.83444	1.13361	1.84342	1.3029	1.28509	1.88776	0.853756	1.87989	1.70964	1.87623	CLM75_RS03650	0.780766	0.990348	0.385538	-0.65665	0.0455791	0.673995	0.175684	1.10096	0.744864	-0.624867	0.588898	0.624352	-1.10772	0.405399	0.982999	0.719436	1.43939	1.06203	0.434343	0.285654
	CLM75_RS03655	-0.149612	-0.80138	-0.255828	0.354576	-0.947739	-1.24227	-0.908067	-0.643012	-1.1011	0.176262	0.0133652	0.248373	0.0662321	-0.415066	-0.273784	-0.402437	-1.09106	-0.288652	-0.570615	0.143016	CLM75_RS03655	0.00309518	-0.635464	-0.292525	-0.714882	0.452364	0.610327	-1.62038	-0.440425	-0.841205	-0.624867	0.0930909	-0.206208	0.103417	1.33052	-4.12869	-0.184589	-0.141252	-0.575406	0.289105	0.768116
	CLM75_RS03660	3.94106	3.67838	3.86244	3.44309	3.5529	3.23678	3.73047	3.6575	3.56744	3.18061	3.33481	3.84176	3.36067	3.46115	3.5666	4.0368	3.54065	3.55865	3.29312	3.95363	CLM75_RS03660	4.53574	3.76003	4.08596	3.28077	3.50071	4.9673	3.27421	3.92195	4.05396	4.07977	3.74226	4.48042	4.44785	4.33212	3.00681	3.33068	4.5166	3.60251	3.63736	3.11667
	CLM75_RS03665	4.59993	4.59693	4.74213	4.45658	4.31301	4.07614	4.37852	4.7312	4.54943	4.19896	4.42123	4.73822	3.99846	4.40981	4.79818	4.62833	4.58303	4.31492	3.68411	4.93892	CLM75_RS03665	4.97856	4.76027	5.03586	4.73377	4.8001	5.49079	4.49244	5.18424	5.11302	4.93817	4.80838	4.87477	5.12282	5.00728	5.09176	4.89936	5.60884	4.88736	4.85011	4.66532
	CLM75_RS03670	1.65305	1.98976	1.88164	1.2197	1.5202	1.20133	1.57677	1.59949	1.42675	0.967229	1.62438	1.5473	1.4383	1.77264	1.9099	1.92213	1.63515	1.66926	1.0949	2.03237	CLM75_RS03670	2.42083	1.8071	2.78982	2.33659	2.39726	3.22942	1.85171	2.50004	2.52631	1.92682	2.29358	2.08418	2.04466	2.42135	1.12341	1.8064	2.15843	1.96571	2.05707	1.39111
	CLM75_RS03675	3.28347	3.25496	2.84025	2.09253	2.92524	2.89931	3.10575	3.00683	3.05027	2.60735	2.93232	3.09484	2.95641	2.90647	3.01649	3.05225	3.03996	3.04723	2.70015	3.30252	CLM75_RS03675	3.57092	2.87028	3.32569	2.66812	3.02842	4.23912	2.27773	3.52352	3.41873	3.38604	3.34847	3.31511	2.36258	3.4032	2.46266	3.07943	3.79313	3.00689	2.70251	2.49162
	CLM75_RS03690	1.00675	1.80483	1.89454	1.19395	1.46279	2.0852	1.97946	1.08399	2.20364	1.41269	1.76776	1.70914	1.96436	1.45948	1.47914	2.05195	1.41158	2.41562	1.38688	1.8665	CLM75_RS03690	2.46639	1.56517	1.78128	1.46854	1.80167	1.96032	1.18196	1.60943	1.65091	0.664233	1.27061	2.18752	1.81372	1.2396	0.557251	1.19048	1.76652	1.39559	1.3417	1.02991
	CLM75_RS03695	5.44018	5.30988	5.25993	4.92603	5.24064	5.18122	5.11511	5.48812	5.31728	4.9477	5.08698	5.33487	4.7944	5.45228	5.03092	5.38524	5.06304	4.96405	5.05112	5.40926	CLM75_RS03695	5.43047	4.84252	5.55495	5.19359	5.15483	5.9015	4.79373	5.47888	5.52766	5.08363	5.42267	5.5892	4.94369	5.72413	4.77257	5.06647	5.61197	5.12262	5.13303	4.61205
	CLM75_RS03700	2.90563	3.2867	2.87972	2.59363	3.062	2.10031	2.59472	3.13385	2.89731	2.31631	3.22105	3.02276	2.46834	3.04004	3.0384	2.96015	3.26613	2.59921	2.26577	2.99829	CLM75_RS03700	2.47385	2.56629	2.88378	2.27807	3.09805	3.08466	2.53293	3.01808	2.8722	2.5778	2.89267	3.12737	2.96116	2.86332	1.36888	2.512	3.02291	2.48701	2.39798	2.76254
	CLM75_RS03705	4.65172	4.8076	4.66515	4.28886	4.57756	4.42573	4.76501	4.71566	4.58326	4.37593	4.49265	4.89953	4.61576	4.36948	4.73026	4.70189	4.82328	4.86937	4.28623	5.13102	CLM75_RS03705	5.39752	5.20022	5.53451	4.10409	5.27619	5.7361	4.14434	5.23038	5.14086	5.22719	5.3146	5.62908	5.7702	4.9812	3.92698	3.9596	5.53806	5.31973	3.98095	5.009
	CLM75_RS03710	7.75284	6.15425	7.24304	7.63823	7.80524	8.19686	6.50329	7.59929	6.26656	7.52372	7.53916	6.39306	6.8417	7.51045	7.82973	6.99341	7.93899	6.20173	8.10393	5.92155	CLM75_RS03710	5.67	6.83745	6.53857	6.80516	6.5178	5.31473	7.00151	6.22492	6.29434	6.28015	6.26452	6.57275	5.98468	6.2121	7.20997	6.83154	5.96088	6.47008	6.91094	6.87765
	CLM75_RS03715	6.08301	4.89772	5.48565	5.62011	6.2689	6.56714	5.34539	6.04988	4.98022	5.73277	5.90983	5.12713	5.55315	5.97487	6.25912	5.58145	6.16822	5.13304	6.5508	4.78727	CLM75_RS03715	4.38966	5.3042	5.17929	5.22006	4.67658	4.34885	5.50983	4.96255	4.85991	4.77379	4.60198	5.16255	5.15613	4.94028	5.84391	5.42652	4.95728	5.22999	5.60469	5.35451
	CLM75_RS03720	11.9651	10.9695	11.4148	11.6873	12.2066	12.2033	11.2982	12.1415	10.9486	11.4484	11.3595	11.525	10.7502	12.047	12.2504	11.9839	12.2048	11.1596	11.9437	10.7817	CLM75_RS03720	8.94877	10.157	9.94053	10.2426	9.66068	8.79206	10.295	9.90798	9.80163	9.86192	9.57196	9.961	9.88291	9.64874	10.8468	10.387	9.63806	10.1249	10.5474	10.077
	CLM75_RS03725	8.07878	8.94913	8.47441	9.00367	8.14696	10.0581	9.49918	9.24971	9.37866	9.28203	7.70481	8.90104	9.81413	9.45545	8.10411	8.9564	8.5637	9.40319	9.99918	8.18767	CLM75_RS03725	7.87941	8.98357	8.73107	9.09824	8.38626	7.5994	9.17796	8.69712	8.60447	8.42649	8.43536	8.70056	8.49968	8.52143	9.89142	9.20415	8.53113	8.82193	9.39201	9.01242
	CLM75_RS03735	9.94615	10.8836	10.3393	9.71157	10.106	11.1512	10.6195	10.427	10.6419	9.5605	9.87367	10.1207	11.4055	10.6013	9.85567	10.5374	10.1183	11.1987	11.1506	9.73358	CLM75_RS03735	9.19469	10.1691	10.0612	10.0151	10.039	9.12841	10.188	10.0037	9.91583	9.86016	9.99232	9.88129	9.88694	9.8251	10.8503	10.2062	9.78057	10.0738	10.4357	10.0417
	CLM75_RS03740	6.79331	7.04839	6.67552	6.65146	6.58111	6.5124	6.91324	6.95066	7.04716	6.71449	6.54634	6.96401	6.95075	6.89993	6.41415	6.95034	6.79871	7.24558	6.64651	6.78849	CLM75_RS03740	6.17774	6.35604	6.09839	6.15231	6.076	6.01084	6.25665	6.1975	6.0924	6.12989	6.13857	6.05903	6.39358	5.92988	6.56551	6.21836	6.16362	6.15098	6.27064	6.04521
	CLM75_RS03745	7.96569	8.10491	7.99895	8.18281	7.76498	8.15744	8.23218	8.36273	8.23564	8.07123	7.83085	8.26097	8.25359	8.3547	7.91128	8.22053	8.01211	8.16854	7.91712	8.12553	CLM75_RS03745	7.62258	7.89829	7.88537	7.81238	7.78568	7.82125	7.79505	7.7303	7.68874	7.57222	7.62924	7.65513	7.76503	7.71137	8.12661	7.77576	7.65661	7.66707	7.81919	7.70359
	CLM75_RS03750	7.81396	8.16521	7.72686	7.96013	7.74311	8.53372	8.37394	8.04498	8.24523	7.92659	7.72732	7.91233	8.45045	8.27405	7.80358	8.00561	8.16767	8.55011	8.41849	7.9483	CLM75_RS03750	5.84622	6.7358	6.41274	6.46583	6.29688	5.72048	6.55542	6.13807	5.96424	6.08346	5.75841	5.84655	5.95186	5.91251	7.02428	6.54014	5.81611	6.21704	6.54879	6.36964
	CLM75_RS03755	7.27878	7.52944	7.27423	7.47263	7.36884	7.66522	7.41588	7.6482	7.48072	7.44415	7.15615	7.0725	7.47029	7.55824	7.38308	7.56084	7.33251	7.47189	7.69495	6.94465	CLM75_RS03755	5.24137	6.11098	5.5587	5.76188	5.55732	5.16859	5.88597	5.57017	5.58381	5.84952	5.59024	5.57566	5.38406	5.70195	5.91085	5.81464	5.39247	5.72591	5.8875	5.80779
	CLM75_RS03760	7.20677	6.62894	7.0135	7.08587	7.29546	6.94508	6.69234	6.97762	6.78003	7.05137	7.05864	6.7393	7.09349	7.01978	7.15556	6.94748	7.09231	6.99373	6.95642	6.59505	CLM75_RS03760	5.10997	5.44428	5.09908	5.46431	5.12873	4.85274	5.61024	5.1399	5.09198	5.14921	5.18181	5.41611	5.05382	4.87381	5.63397	5.4044	4.91981	5.27292	5.38742	5.27918
	CLM75_RS03765	5.81851	5.82463	6.00619	6.13449	6.14548	6.10041	5.88653	6.05421	5.86503	6.12622	5.9508	5.84724	6.04576	6.04276	5.99586	6.10207	5.64403	6.14522	6.01686	5.72889	CLM75_RS03765	4.56221	4.90703	4.52559	4.77798	4.40162	4.07783	4.72957	4.45114	4.38989	4.5493	4.41893	4.04221	4.21485	4.62488	4.78847	4.64067	4.33873	4.81175	4.72156	4.50847
	CLM75_RS03770	5.73694	5.953	6.04288	6.18273	5.83074	6.11397	6.10645	5.9846	5.975	5.97611	5.79995	6.17069	6.18853	6.03655	5.94214	6.18047	5.9665	5.99577	6.13235	5.94833	CLM75_RS03770	5.44761	5.30533	5.35275	5.26688	5.63843	5.56053	5.30129	5.20465	5.33931	5.43208	5.33278	5.4742	5.27459	5.37081	5.39166	5.32048	5.37781	5.31032	5.35585	5.45982
	CLM75_RS03775	8.29293	8.5936	8.93702	8.67286	8.29076	9.14571	8.34667	8.93929	8.43842	8.63806	9.19966	8.70448	8.44409	8.99238	8.40458	8.26754	8.59428	8.28459	8.80538	9.41522	CLM75_RS03775	9.27043	9.61008	9.65064	9.65078	9.47694	9.18266	9.97236	9.5629	9.52561	9.53174	9.31852	9.77049	9.72125	9.48899	10.1605	9.84294	9.48312	9.85256	9.96468	9.88245
	CLM75_RS03785	3.79037	4.2423	3.80208	3.99854	3.64288	3.62949	4.33014	3.55645	4.01383	3.58032	3.79021	3.44204	4.39901	3.67706	3.96388	3.85973	3.35629	4.07186	3.62045	3.70329	CLM75_RS03785	4.86548	4.61789	4.41729	4.02623	4.91869	4.18369	4.28985	4.60202	4.56688	4.49359	4.67602	5.03179	4.72809	4.45341	3.94602	4.26055	4.4655	4.63246	4.28174	5.16702
	CLM75_RS03790	4.75448	3.86166	3.88847	3.56107	4.1361	2.54342	3.96764	3.04711	4.41186	3.94665	4.53461	2.58753	4.50648	2.53121	2.95254	2.81225	3.77118	3.42378	3.04243	2.96676	CLM75_RS03790	5.66512	5.14842	4.97873	4.61469	5.59895	4.53182	4.32646	5.1642	5.09524	5.36294	5.30358	5.76536	5.00895	4.69072	4.60302	4.62982	5.12032	5.10095	4.42148	5.73623
	CLM75_RS03795	6.59843	6.41013	5.96931	6.03378	6.01551	4.84454	6.38037	5.39266	6.96324	6.39181	6.72501	4.60675	6.8578	4.79291	5.42322	4.884	5.98295	5.43851	5.31329	4.95393	CLM75_RS03795	7.84335	7.13182	7.04872	6.70288	7.71034	6.95601	6.5174	7.36244	7.12005	7.37006	7.20104	7.89047	7.3215	6.84689	6.92942	6.66076	7.0328	6.92282	6.56915	7.8222
	CLM75_RS03800	6.41767	6.09236	5.76577	5.60615	5.78974	4.34872	6.38647	4.98817	6.88596	6.00876	6.50024	4.59022	6.87294	4.58154	5.22413	4.86314	5.77444	5.43103	4.51826	5.01798	CLM75_RS03800	7.51827	6.44946	6.41688	5.88583	7.22909	6.71308	5.77292	6.79297	6.64037	6.82956	6.70045	7.43543	7.06735	6.34549	6.28438	5.80019	6.80034	6.41885	5.87164	6.91111
	CLM75_RS03805	6.80515	7.24853	6.37473	6.21789	6.0694	5.07047	7.23811	5.4817	7.83845	6.63535	6.8059	5.26499	7.86473	5.3337	5.54173	5.40436	6.33619	6.37804	5.12179	5.64099	CLM75_RS03805	7.95111	6.7137	6.88377	6.41794	7.476	7.33959	6.19925	7.35305	6.99965	6.91981	7.07349	7.68854	7.76097	6.66175	6.8137	6.4312	7.2884	6.5435	6.36491	7.30787
	CLM75_RS03810	5.94064	6.71894	5.58253	5.41116	5.39248	3.79422	6.7891	4.15126	7.45376	6.0646	5.9676	4.07051	7.4018	4.43697	4.4016	4.63871	5.16869	6.19394	4.12252	4.52803	CLM75_RS03810	6.97561	5.82192	5.70271	5.84296	6.37843	6.36443	5.37187	6.15652	6.07354	5.82214	6.0723	6.87818	7.06077	5.84761	5.94673	5.42023	6.50211	5.6808	5.59755	6.51875
	CLM75_RS03815	5.49349	6.289	5.23732	4.71598	4.64363	3.4075	6.22384	3.72734	6.96858	5.40464	5.33093	3.81711	6.66651	3.88666	3.66142	4.38055	4.82821	5.85848	3.52886	3.97643	CLM75_RS03815	6.10518	4.75945	4.81388	4.49777	5.28368	5.30722	4.57994	5.27508	4.8723	4.84725	5.07208	5.90944	6.03925	4.78617	4.86549	4.74092	5.32909	4.72296	4.82587	5.24091
	CLM75_RS03820	6.60049	7.83414	6.68437	6.23179	6.20468	4.75785	7.9883	5.20287	8.54991	6.85104	6.76348	5.40152	8.01632	5.24886	5.67359	5.83471	6.35442	7.41604	4.87511	5.75418	CLM75_RS03820	7.20376	6.20001	5.91612	5.78504	6.50184	6.82424	5.70225	6.28034	6.17321	6.01476	6.10652	6.82652	6.99327	5.87335	6.17365	5.66849	6.54294	5.88597	5.80021	6.30398
	CLM75_RS03825	7.58734	7.75976	7.04205	6.56905	6.97035	5.13794	8.22879	5.99172	8.30256	6.98952	7.51364	6.25831	7.74513	5.6199	6.25327	6.26197	7.63088	7.65258	5.10708	6.41481	CLM75_RS03825	6.72844	5.98198	5.69795	5.63357	6.23448	6.43695	5.65698	6.0207	5.91025	6.05274	5.65911	6.32979	6.29984	5.79669	5.86907	5.53406	6.12023	5.57829	5.66954	6.03566
	CLM75_RS03835	4.92596	5.22232	4.78261	3.80166	4.67557	3.30033	5.34191	4.19001	5.1908	4.19896	4.71354	4.54591	5.30553	4.00212	4.48641	4.86866	4.80338	5.23958	3.28567	4.62213	CLM75_RS03835	4.38373	4.05485	4.59156	3.95798	3.96555	5.12653	3.53832	4.3076	4.15261	4.19681	4.50697	4.20235	4.53904	4.63606	3.7433	3.8665	4.49298	3.99107	3.99272	3.78206
	CLM75_RS03840	8.61466	8.27016	8.25805	7.97178	8.37839	7.03361	8.52337	7.7801	8.58119	8.4437	8.54422	8.13255	7.94224	7.52619	8.08109	7.90422	8.50317	8.1184	6.85824	8.33576	CLM75_RS03840	8.5668	7.54023	8.06764	8.12419	7.53577	8.7784	7.51377	8.35885	8.48696	7.94537	8.14851	7.93649	8.07903	8.51099	7.74636	7.86038	8.58639	7.80584	7.98712	7.58566
	CLM75_RS03845	7.66559	7.75385	7.4286	6.6381	7.64207	6.09994	7.91275	6.55491	7.88997	6.88133	7.90555	7.15454	7.63352	6.42401	7.16535	7.28672	7.47689	7.82866	6.33658	7.30859	CLM75_RS03845	7.18911	6.6612	6.59083	6.36841	6.7446	6.78603	6.20122	6.7999	6.92292	6.92567	6.93316	6.78122	7.04308	6.85983	6.00236	6.19793	6.82013	6.61475	6.13869	6.79327
	CLM75_RS03850	7.64558	8.16761	7.58803	7.15108	7.49546	6.4522	8.10423	6.86803	8.4814	7.4792	8.03112	7.2161	8.13218	6.79387	7.23835	7.33455	7.66725	7.81149	6.59098	7.41465	CLM75_RS03850	7.60952	6.96592	7.08614	7.06786	7.31567	7.42707	6.8383	7.15676	7.15031	7.29464	7.31243	7.4801	7.58415	7.17329	7.00399	6.97868	7.368	7.12963	6.95008	7.34142
	CLM75_RS03855	4.49751	5.21752	4.56579	4.24723	4.47058	4.20931	5.05769	4.07294	5.12615	4.39671	4.68897	4.43457	5.15485	4.15719	4.4016	4.48482	4.61534	4.89801	4.25418	4.26646	CLM75_RS03855	4.99937	4.4939	4.63345	4.29138	4.75231	5.01315	4.16874	4.55114	4.55036	4.73694	4.58792	4.70353	4.70577	4.82187	4.23627	4.27317	4.56918	4.48357	4.09927	4.51764
	CLM75_RS03860	7.2557	6.92671	6.77831	6.72127	7.32697	7.31785	6.81595	6.77589	7.0183	6.76209	7.11797	6.70899	6.93048	6.80538	7.18287	6.77576	7.47107	6.79461	7.2974	6.64287	CLM75_RS03860	6.26842	6.36147	6.18254	6.3671	6.20191	6.13481	6.44266	6.21835	6.30809	6.06234	6.24801	6.26376	6.45174	6.27355	6.33038	6.22234	6.29917	6.19396	6.23425	6.19952
	CLM75_RS03865	5.24326	5.17645	5.43355	5.32038	5.25021	5.49175	5.41928	5.34901	5.43664	5.68178	5.15786	5.43314	5.52098	5.50715	5.12437	5.39062	4.95987	5.51882	5.54913	5.25182	CLM75_RS03865	4.49051	4.7701	4.52712	4.65261	4.61655	4.3143	4.69453	4.40339	4.48358	4.48409	4.50483	4.51489	4.29178	4.51286	4.56042	4.26617	4.55946	4.33451	4.75454	4.41989
	CLM75_RS03870	2.87872	2.66117	2.6929	2.63249	2.50937	3.17745	2.91648	2.65589	3.10675	2.5145	2.57586	2.56233	3.07933	2.90258	2.76816	3.00092	2.65655	3.01989	3.02018	2.61228	CLM75_RS03870	1.4285	2.20017	1.82182	2.12879	2.21078	1.58306	2.08609	1.71277	1.73682	2.0174	1.81683	1.23338	2.62294	2.05875	2.43597	1.81409	2.03302	1.58917	1.99151	1.39111
	CLM75_RS03875	7.39801	7.95328	7.75079	7.4257	7.19548	8.02188	8.04004	7.5288	8.34473	7.40097	6.99083	7.03023	8.22679	7.63313	7.21168	7.74355	7.18076	8.09549	7.88654	6.47088	CLM75_RS03875	5.40437	7.17376	6.35908	6.37584	6.3761	5.16859	6.55952	6.06601	5.96824	6.14202	5.87135	6.11253	5.67001	5.91527	6.99259	6.4942	5.46537	6.2456	6.6022	6.32242
	CLM75_RS03880	9.85959	8.4286	9.60666	9.02829	9.59585	9.18412	8.50262	9.00108	8.57474	8.87599	9.99943	8.41615	9.57679	9.07598	9.4945	8.76613	9.41773	8.85712	9.2793	8.06192	CLM75_RS03880	6.32517	8.04893	7.17097	7.55646	7.34042	6.27914	7.75308	7.03314	7.00095	7.18361	6.9816	7.05354	6.99327	6.80984	7.908	7.63859	6.56495	7.28754	7.60328	7.46159
	CLM75_RS03885	5.36558	6.06401	5.71575	5.38935	5.59809	5.59472	5.62981	5.67245	5.95021	5.35979	5.46323	5.66982	6.10352	5.70785	5.34919	5.64263	5.54147	6.26939	5.79893	5.57604	CLM75_RS03885	4.3738	4.54058	4.404	4.42041	4.49061	4.35048	4.53477	4.40229	4.26243	4.72624	4.5449	4.7184	4.73912	4.51043	5.04396	4.49036	4.56271	4.7152	4.42645	4.875
	CLM75_RS03890	6.84323	7.03483	6.88562	6.94708	6.89233	6.95161	7.2945	6.99992	7.13992	7.07384	6.83621	7.08361	7.12885	7.01009	6.70416	6.87257	6.87671	7.31907	6.99886	7.06335	CLM75_RS03890	5.95478	6.34321	6.11276	5.92985	6.09812	5.92131	6.23884	5.8886	6.04308	6.10325	6.13028	6.03449	6.07451	6.24096	6.16961	5.97505	6.01163	6.19442	6.07404	6.0589
	CLM75_RS03895	6.838	6.43425	6.60514	6.36285	6.85586	6.07673	6.09076	7.01523	6.41528	6.00671	6.48313	6.82832	5.82797	6.77483	6.72373	6.70751	6.99282	6.02777	6.11093	6.73132	CLM75_RS03895	5.00066	5.15468	5.36309	4.99333	4.97684	5.41285	4.93001	5.2859	5.4298	4.99724	5.26622	5.0554	5.27459	5.20947	5.24181	4.92179	5.6445	5.10095	5.31221	4.85583
	CLM75_RS03900	9.26958	9.46806	9.26184	9.60702	9.16693	10.4413	9.49546	9.70514	9.28538	9.5948	8.68058	9.34956	9.54968	9.74124	8.96684	9.6667	9.5415	9.62524	10.5104	8.99645	CLM75_RS03900	8.27737	9.27364	8.73538	8.97947	8.82817	7.63066	9.23267	8.39994	8.26807	8.68531	8.534	8.69243	8.49073	8.252	9.67832	9.12161	8.0723	8.86917	8.99843	9.18792
	CLM75_RS03910	10.7582	11.7	11.0659	11.4796	11.0195	12.816	11.7169	11.4425	11.6068	10.9744	10.6123	10.9468	12.3708	11.6899	10.8708	11.5239	11.0309	12.2735	12.8199	10.5891	CLM75_RS03910	10.5481	11.4372	11.1955	11.4263	11.2563	10.4691	11.6232	11.0865	10.8933	11.1949	10.883	11.3135	11.1642	10.7827	11.9451	11.6305	10.9211	11.2485	11.6886	11.2891
	CLM75_RS03915	6.55063	6.59395	6.65101	6.35306	6.39654	6.8048	6.53322	6.55447	6.67637	6.38481	6.38888	6.42836	6.67539	6.61452	6.47533	6.5865	6.34413	6.7661	6.89294	6.30109	CLM75_RS03915	5.24247	5.64853	5.44081	5.51348	5.47902	5.31639	5.63282	5.43043	5.33794	5.50591	5.4238	5.5551	5.47265	5.45152	5.77372	5.66317	5.60255	5.63217	5.68517	5.54306
	CLM75_RS03920	7.95944	8.21099	7.95111	7.99059	8.03309	8.71808	8.22738	8.25721	8.1445	8.06348	7.71438	7.79327	8.26231	8.3514	7.81063	8.00911	8.02236	8.36404	8.65112	7.73872	CLM75_RS03920	6.44382	7.19154	6.72515	6.85449	6.94919	5.94731	7.25072	6.58714	6.52193	6.73929	6.55418	6.76699	6.45843	6.47507	7.30058	7.06502	6.35546	7.03279	7.01235	6.92325
	CLM75_RS03925	9.90897	8.8041	9.57901	9.68052	9.98517	9.68874	8.88746	9.77591	8.99093	9.56998	9.95227	9.13654	9.40133	9.77467	9.87539	9.32647	9.87839	9.0179	9.75819	8.80473	CLM75_RS03925	8.26628	8.8705	8.49006	8.79396	8.70794	8.11482	8.89534	8.40711	8.4145	8.63827	8.54652	8.48766	8.4265	8.42575	8.77507	8.77815	8.20257	8.55003	8.67629	8.84194
	CLM75_RS03930	7.60572	6.55701	7.35465	7.22345	7.64429	7.37994	6.64989	7.38543	6.50058	7.10218	7.67896	7.11175	6.9765	7.45588	7.45594	7.13657	7.65036	6.66899	7.5458	6.72629	CLM75_RS03930	5.89702	6.28185	6.08648	6.11047	5.96236	5.69513	6.31003	5.96647	5.83433	5.88604	6.08666	5.98515	5.74853	5.86006	6.47829	6.18872	5.88902	6.1505	6.15936	6.1746
	CLM75_RS03935	7.66559	6.59422	7.45824	7.34229	7.62663	7.56239	6.94181	7.58247	6.55619	7.32452	7.73402	7.23947	6.94782	7.40726	7.57002	7.39602	7.63356	6.72837	7.35142	6.951	CLM75_RS03935	6.00453	6.37736	6.32069	6.49503	6.36555	6.0026	6.56003	6.33024	6.24498	6.35066	6.32269	6.42802	6.63121	6.11232	6.54067	6.515	6.1529	6.31528	6.53015	6.49804
	CLM75_RS03940	7.02204	7.04143	7.2981	7.02944	7.20015	7.14439	7.33201	7.13425	6.83371	7.03849	7.06472	7.26052	6.95805	7.1562	7.22049	7.35749	6.95703	7.30875	7.27549	7.00328	CLM75_RS03940	6.49876	6.55389	6.43169	6.68188	6.45837	6.4033	6.39003	6.45498	6.57946	6.43688	6.67597	6.46375	6.14671	6.39241	6.31215	6.487	6.42753	6.57707	6.52292	6.57258
	CLM75_RS03945	4.54279	4.41501	4.76163	4.16679	4.66606	4.13236	4.42797	4.35555	4.33641	4.47951	4.66627	4.50681	4.1515	4.33524	4.50357	4.56857	4.48526	4.23396	4.05627	4.76518	CLM75_RS03945	5.15821	4.64662	4.43537	4.45714	4.5886	4.93626	4.40614	4.87773	4.90792	5.28668	5.01467	4.81608	4.43434	4.64273	4.07268	4.59229	4.95974	4.80079	4.44003	4.23569
	CLM75_RS03950	2.26508	1.98976	2.20539	1.8421	2.09323	2.17359	2.01487	1.76564	2.16161	1.95132	2.3438	2.31319	1.76568	2.44284	2.08854	2.22022	2.28981	2.37304	1.97323	2.14936	CLM75_RS03950	1.83971	2.73968	2.33038	1.64097	2.14651	1.70998	2.24751	1.48982	1.35739	2.47925	1.76064	2.05324	2.71522	1.45699	2.20261	2.08598	1.95613	2.13037	1.56546	2.9993
	CLM75_RS03955	4.29461	4.58634	4.34383	4.29796	4.34712	4.08376	4.79486	4.49678	4.49546	4.10875	4.22706	4.54591	4.14895	4.29274	4.30097	4.48626	4.05483	4.86596	4.15351	4.74274	CLM75_RS03955	3.55695	3.5818	3.5979	3.5792	3.66649	3.69607	3.31364	3.42261	3.47732	4.15752	3.48913	3.26198	3.17122	3.63937	2.93239	3.46133	3.42356	3.47045	3.53753	3.5632
	CLM75_RS03960	0.745897	1.74515	0.948691	1.07206	1.00079	1.11467	1.43754	1.36464	1.5162	0.748494	1.44397	0.989785	1.59636	1.11383	0.380549	1.01996	1.56125	1.68482	1.00712	1.53904	CLM75_RS03960	1.36576	1.47192	1.52303	0.733998	1.2693	0.812461	1.66614	0.839083	0.659439	1.21653	1.03033	1.68068	1.72772	1.55452	0.653046	0.889257	1.99509	1.09429	0.843981	0.683677
	CLM75_RS03965	4.41376	6.15783	5.25868	5.00681	4.51362	5.12229	5.8827	5.57679	5.68905	4.98934	4.50165	5.97688	5.7611	5.56985	4.64951	5.5091	4.65252	5.49915	5.24874	5.63169	CLM75_RS03965	4.94676	4.93205	5.54211	5.00353	5.01183	5.14725	4.68328	5.33878	5.28116	4.63191	5.27126	5.00375	5.43243	4.81598	5.19483	4.87567	5.39975	4.97663	4.96644	4.69528
	CLM75_RS03970	6.11334	7.50406	6.77352	6.32554	6.17203	6.29729	7.53593	7.05498	7.09791	6.93821	6.21679	7.55747	7.28504	6.90675	5.98602	7.14341	6.12037	7.32187	6.52574	7.36799	CLM75_RS03970	6.96639	6.77801	6.76955	7.08075	6.7922	6.80867	7.07972	6.90515	6.94339	7.00253	7.08104	6.87376	6.99557	6.75396	6.85205	7.01709	6.92093	6.87979	7.11539	6.65181
	CLM75_RS03975	4.96358	5.66824	5.25243	5.30843	4.98432	5.52643	5.78761	5.52692	5.64472	5.46791	5.19798	5.93577	5.51604	5.54884	5.00982	5.55226	5.06722	5.80076	5.63436	5.64811	CLM75_RS03975	5.14776	5.07698	5.11038	5.41764	5.18047	5.17593	5.39733	5.30137	5.26028	5.071	5.41587	5.23327	5.58084	5.16538	5.21459	5.22705	5.22028	4.97879	5.34801	4.91026
	CLM75_RS03980	7.87753	8.56712	8.2877	8.36895	8.09404	9.30585	8.89823	8.62098	8.65092	8.55192	7.90846	8.47824	8.95339	8.59985	8.41317	8.49138	8.00352	8.88595	9.04875	8.38303	CLM75_RS03980	7.17489	8.14497	7.71789	7.76324	7.65751	7.21559	7.92267	7.38776	7.45997	7.33922	7.25098	7.4924	8.04832	7.62251	8.15705	7.83023	7.54905	7.9257	7.8748	7.79164
	CLM75_RS03985	6.85191	7.45776	7.25747	7.22106	7.05352	7.78814	7.75623	7.16031	7.43248	7.35693	6.78971	7.01599	7.71464	7.37934	7.15285	7.29248	6.86835	7.65555	7.68702	6.80164	CLM75_RS03985	5.75584	6.75511	6.15354	6.34188	6.22284	5.43981	6.55233	6.17473	6.11544	6.27832	6.09236	6.10972	5.59306	6.10912	6.6751	6.39991	5.84838	6.37478	6.44546	6.52786
	CLM75_RS03990	5.09916	5.53692	5.23985	5.40064	5.21587	5.82425	5.51391	5.52156	5.63247	5.48573	5.07497	5.0938	5.55893	5.53947	5.37883	5.28399	5.01107	5.54356	5.98563	4.96081	CLM75_RS03990	4.44381	4.90406	4.13907	4.4322	4.5099	4.02183	4.74948	4.15212	4.38058	4.39567	4.32759	4.59763	4.44785	4.36744	4.78847	4.96475	4.40893	4.71649	4.9001	4.49304
	CLM75_RS03995	10.7005	11.0261	11.1044	10.228	10.9612	10.4021	11.1371	11.0293	10.5535	10.9675	10.8518	11.7746	10.5619	11.1633	11.3424	11.3108	10.9297	11.1784	10.164	11.9659	CLM75_RS03995	12.8381	12.3559	12.7006	12.6578	12.7715	12.814	12.4574	12.9256	12.9157	12.8298	12.9828	12.7172	12.8113	12.8024	12.0884	12.588	12.8727	12.6852	12.4146	12.7078
	CLM75_RS04020	6.28611	7.44155	6.61003	6.61888	6.55902	6.70298	7.5628	6.57657	7.41626	6.5823	6.25571	6.83491	7.10109	6.85028	6.71808	7.23618	6.20052	7.47678	6.62713	6.79139	CLM75_RS04020	6.68935	6.7333	6.60396	6.75811	6.53986	6.51978	6.63053	6.6918	6.77338	6.41872	6.64913	6.49214	6.36182	6.64966	6.61541	6.54448	6.6755	6.63649	6.69032	6.41372
	CLM75_RS04025	4.59001	4.19986	4.26403	4.25814	4.20118	3.89082	4.23423	4.16962	4.27268	4.5163	4.43741	4.69443	4.62496	4.328	4.10207	4.49199	4.61191	4.14116	3.93068	4.67884	CLM75_RS04025	4.9942	3.62034	4.56792	4.34046	3.56359	5.37184	3.92637	4.92769	4.8704	4.17336	4.52184	4.36864	5.01803	4.84519	4.37619	4.05032	5.10704	4.27769	4.08205	3.79218
	CLM75_RS04030	6.23238	5.76719	6.18227	6.32443	6.25892	5.39625	5.51947	5.90532	6.07208	5.91072	6.35095	6.00287	5.56372	5.75179	6.11792	5.82112	6.08825	5.61786	4.72223	6.35037	CLM75_RS04030	5.11713	4.81589	4.93319	4.53572	4.87804	5.42601	4.36216	4.95955	4.92541	4.47453	4.91521	4.93116	4.93412	5.04636	5.03065	4.7944	5.07331	4.86533	4.82869	4.77906
	CLM75_RS04035	6.15879	5.78952	6.09062	5.86968	5.93138	5.34562	5.58515	5.81925	5.83693	5.83628	5.86119	6.13481	5.41992	5.66598	5.75524	5.90942	6.01055	5.81541	5.24586	6.10759	CLM75_RS04035	5.42855	5.05571	5.24692	5.43113	5.06061	5.30555	5.40648	5.16159	5.22949	5.49491	5.37317	5.35559	5.4858	4.97945	5.4361	5.42149	5.1807	4.96467	5.39187	5.11154
	CLM75_RS04040	5.12915	5.26145	5.22842	5.00865	5.18403	4.64643	5.04061	5.08205	4.98746	4.83967	5.24546	5.54994	5.15865	5.02278	4.85998	5.31665	5.25032	5.37998	4.75494	5.27776	CLM75_RS04040	4.52142	4.28816	4.14308	4.20765	4.2339	4.16904	4.32163	4.11218	4.19421	3.75591	4.31301	4.53463	4.36482	4.30715	3.87826	4.25209	4.04592	4.1964	4.12242	4.21704
	CLM75_RS04045	9.04487	10.1745	9.72918	9.84217	9.00363	9.81845	10.0595	9.75687	10.0534	10.1306	9.47451	10.2633	10.1543	9.77517	9.02349	9.7981	9.20316	10.4682	10.0307	10.1807	CLM75_RS04045	9.18074	8.73025	8.88982	9.28759	8.89642	9.20517	9.21724	9.15128	9.0635	9.19488	9.07114	8.97036	9.13006	8.87023	9.26911	9.30248	9.11961	9.00963	9.18746	8.89645
	CLM75_RS04050	7.21835	8.55237	7.90861	8.46205	7.14105	8.17148	8.61435	8.3932	8.53599	8.72463	7.56378	8.62315	8.5161	8.30211	7.07394	8.20425	7.50719	8.62755	8.18129	8.44289	CLM75_RS04050	8.02149	7.39801	7.69625	7.90773	7.60541	8.06609	7.83625	8.00537	7.89656	7.94825	7.81165	7.87424	7.73228	7.925	8.03234	7.94754	7.73133	7.57074	7.86922	7.60981
	CLM75_RS04055	6.17878	7.2549	6.88036	7.13827	6.16811	7.02448	7.51041	7.12634	7.14559	7.33603	6.26933	7.29917	7.25453	6.99394	6.13624	6.94487	6.12879	7.46627	7.03343	7.02996	CLM75_RS04055	7.00421	6.61173	6.72915	6.84476	6.62045	7.03845	6.59846	7.02384	6.96023	6.62869	6.87644	6.78416	6.96065	7.07522	6.62873	6.8332	7.01336	6.81228	6.91338	6.62729
	CLM75_RS04060	4.31483	5.12982	4.72597	4.37014	4.44302	4.02755	5.22126	4.37941	4.95829	4.61058	4.59475	4.82731	5.1675	4.57177	4.23609	4.76123	4.23199	5.47195	4.25418	4.89531	CLM75_RS04060	5.33031	4.87172	4.93087	4.3006	5.21874	5.62907	4.40842	4.79015	5.14951	4.72086	4.83073	4.97515	4.9998	5.24058	4.24398	4.37938	5.13129	5.04735	4.40772	4.89156
	CLM75_RS04065	5.31428	4.78833	4.63855	5.02973	5.28582	4.97633	4.84688	4.89467	4.90324	4.6336	5.32006	5.05818	4.65941	4.75887	4.8702	5.08222	5.26857	5.03934	4.65595	5.49388	CLM75_RS04065	4.05137	4.55012	4.2602	4.48973	4.45567	4.4109	4.67763	4.21004	4.37389	4.44219	4.11991	4.61362	4.08252	4.07703	3.97411	4.39613	4.58522	4.55921	4.3369	4.24309
	CLM75_RS04070	6.4614	6.72523	6.88158	6.26733	6.71198	6.80998	6.59478	6.83533	6.41662	6.25748	6.44563	6.75096	6.75173	6.61006	6.96733	6.89518	6.49005	6.83417	6.89018	6.83196	CLM75_RS04070	5.52501	5.70938	5.64809	5.74375	5.72534	5.52931	5.95149	5.64487	5.64842	6.02571	5.82757	5.89969	5.67001	5.59368	5.76303	5.75794	5.82018	5.88366	5.7366	5.86763
	CLM75_RS04075	6.79906	6.64943	6.79001	5.95789	7.03856	6.5466	6.46923	6.77477	6.53124	6.26216	6.93305	6.63185	6.49292	6.57349	6.78711	6.66407	6.88714	6.6577	6.76297	6.65917	CLM75_RS04075	5.88309	5.92595	5.82057	5.88583	5.81076	5.79992	6.04159	5.83029	5.89398	6.12785	5.82586	6.22785	6.09613	5.82041	5.85655	5.98998	6.2284	6.08577	5.98294	6.01097
	CLM75_RS04085	6.61116	7.04743	6.69132	6.61585	6.33338	7.00252	7.1806	6.78634	6.852	6.48862	6.44697	7.07361	6.98332	7.02806	6.23204	7.078	7.02023	7.21276	6.94731	6.83321	CLM75_RS04085	5.62885	6.13748	6.18059	6.07171	6.01131	5.59999	6.36444	5.96796	5.86327	5.77618	5.64754	6.19368	6.07451	5.94615	6.62726	6.32416	5.86687	6.09875	6.20346	6.3415
	CLM75_RS04090	6.56969	6.92482	6.94846	7.21267	6.54698	7.35967	7.21888	6.99638	7.01815	7.4292	6.52695	6.94423	7.06875	7.09184	6.66067	6.89167	6.51259	7.1083	7.23694	6.89135	CLM75_RS04090	5.97068	6.33275	5.92313	6.28079	6.0601	5.63374	6.31003	5.92287	5.77057	6.40284	5.87549	5.9697	6.04815	5.76444	6.41309	6.32954	5.75501	5.93746	6.22751	6.22869
	CLM75_RS04095	6.14869	6.6578	6.14091	5.82268	6.30047	4.82988	6.60643	6.18746	6.9701	5.97881	6.35557	6.06699	7.03255	6.27201	6.40855	6.0559	6.37377	7.04152	5.71346	5.88948	CLM75_RS04095	6.31119	4.479	4.62058	5.68303	4.46887	6.03378	6.01267	4.43396	4.64117	4.53097	4.63557	6.41515	6.17542	4.57694	5.52741	5.68693	6.28156	4.61449	5.35585	4.50847
	CLM75_RS04100	6.46367	6.51016	6.66426	6.64257	6.53832	6.01377	6.29795	6.67867	6.68697	6.36087	6.40371	6.76943	6.41867	6.57012	6.35062	6.59851	6.52631	6.49268	5.76989	6.38572	CLM75_RS04100	5.60782	5.27689	5.5099	5.5618	5.07363	5.69129	5.44028	5.56327	5.65229	5.00833	5.3614	5.65249	5.28215	5.52676	5.44282	5.40249	5.60884	5.28782	5.49896	5.12961
	CLM75_RS04105	7.2793	7.0509	7.33792	6.46762	7.41332	6.29441	7.00944	7.05467	6.95664	6.76696	7.27363	7.48556	6.84958	6.98798	6.98577	7.41009	7.17361	7.39018	6.50105	7.56382	CLM75_RS04105	6.29813	5.89147	5.73624	6.12507	5.83306	5.98493	6.21235	5.75403	5.84452	6.10118	5.99677	6.28805	6.19958	6.01801	6.16555	6.23923	6.23858	6.0085	6.02696	5.64567
	CLM75_RS04110	5.64889	5.15297	4.99522	5.00218	5.47374	4.94842	4.84982	5.08326	5.05043	4.78246	5.03831	4.93759	4.98228	4.7728	5.22333	5.05151	5.34351	5.07741	4.95469	4.91078	CLM75_RS04110	4.57092	4.55959	4.48829	4.00609	4.85643	4.73827	4.48598	4.27902	4.41226	4.73961	4.62381	4.85023	4.66006	4.49577	3.55773	4.19137	4.40893	4.67442	3.67752	4.875
	CLM75_RS04115	3.44628	3.55781	3.66946	3.39306	3.73669	2.85545	3.91049	3.54946	3.66845	3.2217	3.42952	4.03124	3.71108	3.35691	3.37038	3.9665	2.79599	4.02832	3.02912	4.06419	CLM75_RS04115	3.66185	3.74848	3.72359	3.41919	3.82888	3.98256	2.93178	3.52149	3.73286	3.69134	3.60538	3.89295	4.379	3.63937	2.66003	2.93169	3.31228	3.4918	3.18548	3.63241
	CLM75_RS04120	5.51112	5.93433	6.1644	6.00214	5.58806	5.35667	6.35848	6.00839	5.98407	5.98658	5.26296	6.59659	6.15334	6.06469	5.44115	6.2125	5.49818	6.17444	5.49691	6.57614	CLM75_RS04120	6.65286	6.54604	6.56344	6.4805	6.53725	6.86289	6.23692	6.59706	6.70067	6.30823	6.80357	6.66516	6.69492	6.76419	6.19966	6.31301	6.93727	6.47928	6.45978	6.17363
	CLM75_RS04125	8.21962	8.65367	8.71324	9.10411	8.17572	8.33782	8.63228	8.79214	8.68675	8.96807	8.16365	8.91116	8.55176	8.71092	8.2467	8.57771	8.10667	8.49134	8.10048	8.81481	CLM75_RS04125	9.51714	9.06379	9.54472	9.36934	8.94348	9.9804	9.04021	9.39299	9.42097	9.03914	9.42405	9.34245	9.31928	9.45884	9.07901	9.27291	9.4726	8.95033	9.22052	8.73684
	CLM75_RS04130	8.18173	7.62876	8.13957	8.29055	8.01417	7.96961	7.8109	8.13987	7.7199	8.23195	7.68476	7.90337	7.85029	8.307	7.66492	7.70983	7.70125	7.91693	8.1218	7.61176	CLM75_RS04130	7.00131	7.47713	7.03935	7.40598	6.97757	7.09551	7.30646	7.06016	7.12105	7.15795	7.18345	7.11756	6.87573	7.12846	7.28945	7.38965	6.94102	7.1125	7.35303	6.80206
	CLM75_RS04135	7.25962	6.66285	7.2034	7.00305	7.23914	6.66695	6.52802	7.23606	6.37768	7.18307	7.18158	7.10958	6.72673	7.37268	6.84782	6.82455	7.25259	6.70209	7.14791	6.93508	CLM75_RS04135	6.92958	6.66449	6.71308	7.17145	6.60359	6.97772	6.89139	6.93446	6.86089	6.99084	6.85689	6.78711	7.02516	6.64911	6.89432	6.99146	6.87337	6.74082	6.91956	6.45092
	CLM75_RS04140	7.28725	7.10976	7.64737	7.42363	7.52095	7.13226	7.03338	7.61131	7.00514	7.44718	6.9692	7.41457	7.14717	7.73706	7.13622	7.26136	7.15783	7.1593	7.59894	7.12792	CLM75_RS04140	6.66064	6.77537	6.7401	6.94748	6.54351	6.69689	6.90799	6.76769	6.76803	6.92801	6.84681	6.76042	6.51408	6.61334	6.95314	6.994	6.96022	6.69256	6.96125	6.61309
	CLM75_RS04145	4.36998	4.71828	4.82535	4.67934	4.52419	4.62045	4.42402	4.59177	4.59673	4.64648	4.48229	4.69056	4.48035	4.74154	4.42258	4.69693	4.52832	4.85998	4.90456	4.60613	CLM75_RS04145	4.20263	3.94635	3.98469	4.12083	3.9993	4.48525	3.57934	4.05432	4.15573	4.15353	4.31301	4.11891	3.89797	4.1723	4.09843	4.00735	3.99398	4.07836	4.16765	3.52124
	CLM75_RS04150	6.62012	6.21531	6.4575	6.48729	6.78918	6.4533	6.14172	6.54307	6.19907	6.49051	6.68548	6.42604	6.10154	6.39	6.51591	6.44447	6.42057	6.53782	6.58606	6.47008	CLM75_RS04150	5.10997	5.36382	4.96748	5.22103	5.31692	5.31223	5.45026	5.00534	5.18586	5.33679	5.13836	5.23154	5.25166	5.45658	5.47922	5.44893	5.31953	5.47638	5.36559	5.49586
	CLM75_RS04155	4.39108	4.3811	4.26652	5.12135	4.58599	4.83441	4.31743	4.88637	4.31739	5.02286	4.29226	4.36583	4.27589	4.8657	4.70878	4.36346	4.94269	4.26793	5.27246	4.55252	CLM75_RS04155	3.8455	3.56497	3.70745	3.55168	3.71161	3.80435	3.61529	3.55961	3.64002	3.26555	3.63303	3.87537	3.61623	3.82674	4.13207	3.39107	3.68412	3.59971	3.68583	3.33309
	CLM75_RS04160	4.52207	3.95352	4.43939	5.38935	4.78209	6.07959	3.79708	4.84555	4.28839	5.59062	4.64089	3.66362	4.2618	5.09704	4.79604	4.48051	4.58653	4.18284	6.57999	3.78564	CLM75_RS04160	3.18683	3.88588	3.54439	3.31755	3.69298	2.88838	3.89096	3.5296	3.27679	3.28026	3.2189	3.50427	3.41082	3.10785	3.90769	3.28989	2.85307	3.75916	3.6544	3.3051
	CLM75_RS04165	5.87202	7.0079	6.73233	6.3614	5.82363	5.68521	5.93448	6.63267	6.74629	6.34097	6.17961	7.00629	5.75524	6.37323	6.13751	6.40173	5.44395	6.00974	5.75985	7.26688	CLM75_RS04165	5.68212	5.57849	5.89371	5.64447	5.57371	6.34703	5.26529	6.05833	6.12344	5.55209	6.00284	5.81115	6.05699	6.04175	5.26473	5.59895	6.48425	5.79441	5.8107	5.14548
	CLM75_RS04170	7.16672	7.49319	7.39409	7.51727	7.29006	7.89668	7.69968	7.51406	7.6497	7.42162	7.18018	7.46162	7.63625	7.42314	7.29879	7.2162	7.42688	7.53131	7.62479	7.74205	CLM75_RS04170	7.75412	7.8813	8.14682	8.19273	7.86833	7.89282	7.99362	8.18723	8.14226	7.74786	8.06469	7.91272	8.07795	8.04187	8.36673	8.10427	7.98187	8.00675	8.34657	8.00893
	CLM75_RS04175	6.05443	5.66018	7.07289	6.63541	5.87817	6.75045	6.08494	7.02409	5.82587	6.51716	6.17157	6.58465	6.20764	6.92174	5.95564	5.92856	5.82958	5.98049	6.51941	7.39828	CLM75_RS04175	7.27164	7.24243	7.56319	7.6501	6.9342	7.54048	7.29757	7.75677	7.85682	7.40613	7.58061	7.40819	7.69452	7.58549	7.62684	7.43275	8.03687	7.58571	7.71882	7.31139
	CLM75_RS04180	4.40812	4.19847	5.3795	5.00496	4.43371	5.01871	4.54887	5.53668	4.81853	4.75753	4.77742	4.69443	5.41356	5.15545	4.72576	3.90124	4.41488	4.58947	4.545	5.75021	CLM75_RS04180	5.99873	5.7064	5.97461	5.72676	5.41111	6.13009	5.29761	6.01096	6.265	5.63168	5.91465	6.07837	6.53322	5.89679	5.96318	5.62268	6.56414	6.09227	5.76973	5.82514
	CLM75_RS04185	4.75003	4.74709	5.64305	4.55719	4.68815	5.34799	5.01809	5.87207	5.22386	4.58247	4.63154	4.88096	5.72902	5.48063	4.97142	4.26481	4.65696	5.14293	4.95821	5.8231	CLM75_RS04185	6.07056	5.98936	6.32862	5.92628	5.54387	6.60562	5.68073	6.34496	6.60967	5.85445	5.83525	6.42046	6.79346	6.30752	5.96318	5.76242	6.78514	6.34617	6.05371	6.16295
	CLM75_RS04190	5.50497	5.92006	6.57439	5.44497	5.45638	6.38321	6.32536	6.25136	6.31889	5.41264	5.52383	5.8671	6.90653	6.0272	5.67999	5.46316	5.30015	6.67314	5.80154	6.66022	CLM75_RS04190	6.23096	6.59961	6.49653	6.08403	6.10448	6.61173	5.95851	6.61528	6.58555	6.35414	6.23389	6.65554	7.34336	6.31936	6.56704	5.98573	6.97125	6.50838	6.16977	6.51494
	CLM75_RS04195	7.11087	6.79679	7.00831	7.25725	7.2362	7.92269	6.98932	7.36341	7.04021	7.36027	6.93067	6.52611	7.27397	7.41171	7.41448	6.71672	7.17245	6.82037	7.83218	5.97575	CLM75_RS04195	5.40046	6.57716	5.9405	6.23346	5.86503	5.12179	6.3975	5.87593	5.86231	5.54602	5.64657	5.78785	5.99851	5.99908	6.66652	6.31843	5.44793	6.05689	6.43656	6.23148
	CLM75_RS04200	6.53478	6.54421	6.32674	6.11104	6.46164	5.94375	6.45866	6.15384	6.70647	5.89366	6.82754	6.15111	6.15143	5.51035	6.15558	6.36159	6.41599	6.22884	5.35389	7.06282	CLM75_RS04200	6.4561	5.8021	6.03944	5.90409	5.66448	6.22126	5.96006	6.23549	6.2391	6.1115	6.00284	6.03251	6.49793	6.44677	5.58926	5.86966	6.34135	6.1185	5.87027	6.00772
	CLM75_RS04205	7.49401	7.03093	7.23482	6.6485	7.49993	6.13201	6.99199	6.57485	7.12728	6.90011	8.00388	6.913	6.47726	5.96743	7.37323	7.0908	7.54781	6.75094	5.41486	8.02152	CLM75_RS04205	8.45057	7.30151	7.89356	8.00269	8.01204	8.44842	7.88676	8.06177	8.04919	8.21979	7.96329	7.97698	8.36552	8.27883	7.81592	8.088	8.19631	8.07327	7.71882	7.91598
	CLM75_RS04210	5.90707	4.96956	5.89098	5.49261	6.43436	5.37465	5.11756	5.66357	5.51594	5.60816	6.1136	5.10838	5.3158	5.78282	5.95372	5.231	5.89073	5.44879	5.40459	5.82687	CLM75_RS04210	6.79171	6.36526	6.19898	6.39748	6.35433	6.50308	6.45098	6.27884	6.47458	6.54133	6.26073	6.6197	6.32202	6.43721	5.89134	6.29663	6.41412	6.42718	6.30915	6.50267
	CLM75_RS04215	5.53889	4.64466	5.63634	5.35854	5.73624	5.19713	4.90088	5.47063	5.09411	5.34359	5.51624	5.13284	5.10967	5.66713	5.39661	5.16078	5.39028	5.04688	4.98832	5.6034	CLM75_RS04215	6.60103	6.01679	6.12395	6.30251	6.1101	6.51544	6.2143	6.32791	6.36147	6.45968	6.26199	6.53476	6.31097	6.3145	5.76571	6.14517	6.42842	6.07317	6.00678	6.21371
	CLM75_RS04220	4.97887	4.50771	5.2297	5.22668	5.14122	5.14706	4.37034	5.40434	5.27699	4.98934	4.9329	4.64926	5.19742	5.39386	5.21213	4.57398	5.22362	4.84707	4.74548	5.16814	CLM75_RS04220	5.3985	5.14339	4.90752	4.73649	5.12457	4.90895	5.33402	4.8529	4.93997	4.86199	4.75545	5.29738	4.62481	5.18074	4.95278	4.82708	5.19122	5.11084	4.97749	5.26472
	CLM75_RS04225	5.48012	5.62336	5.79273	5.97311	5.53246	5.92796	5.65472	6.0659	6.07661	5.76266	5.23161	5.84637	6.16475	6.06469	5.60428	5.36976	5.53665	6.01012	5.99991	5.89905	CLM75_RS04225	5.84694	5.80051	5.6325	5.656	5.61981	5.9026	5.71058	5.60848	5.76342	5.3262	5.43057	5.98207	5.90365	5.82628	5.45948	5.61004	5.99731	5.81028	5.62645	5.97811
	CLM75_RS04230	6.3019	6.13911	6.46239	6.2708	6.9129	6.5303	6.09615	6.72829	6.51505	6.3634	6.74951	6.14121	6.41496	6.77642	6.69009	6.15496	6.88502	6.32381	6.4849	6.55585	CLM75_RS04230	6.51872	5.95818	6.1056	6.0609	6.48623	6.28891	6.441	6.27583	6.23578	5.87518	6.06361	6.59842	6.49793	6.14166	5.96551	6.23851	6.53552	6.32466	6.15075	6.71233
	CLM75_RS04235	6.08478	5.83853	6.39303	7.18394	6.65665	6.7597	5.88987	6.95992	5.88325	6.94773	5.681	6.25831	5.72475	7.40897	6.38701	5.9485	6.93113	5.63648	7.29902	5.48197	CLM75_RS04235	6.97462	6.72237	6.35131	6.15637	7.14695	6.04837	7.021	6.00042	5.76802	6.7286	6.21244	7.4859	7.03191	5.83116	6.31215	6.34256	6.03518	6.81076	5.83893	7.71394
	CLM75_RS04240	5.61668	5.61557	5.65258	6.02422	5.61877	6.07959	5.55899	6.13235	5.68497	5.98479	4.94427	5.61061	5.62003	6.31621	5.21132	5.42697	5.80177	5.57154	5.9925	5.36588	CLM75_RS04240	5.70368	5.6901	5.17245	5.20443	6.16047	4.8493	6.10477	5.01621	4.82011	5.4452	5.14524	5.76894	5.67001	5.10227	5.16264	5.35845	5.05499	5.59036	5.07566	6.78949
	CLM75_RS04245	9.27191	8.95145	9.05891	9.00633	8.99662	9.21124	9.00336	9.29347	8.82002	9.15484	8.33939	8.64682	8.68234	9.27663	8.6246	8.80153	9.2759	8.70511	9.22318	8.36176	CLM75_RS04245	8.44299	8.25949	7.90658	7.95212	8.76044	7.51861	8.82928	7.47092	7.26951	8.01573	7.6888	8.39682	8.02935	7.6698	7.93981	8.19414	7.40191	8.236	7.66043	9.22749
	CLM75_RS04250	6.46276	6.45477	6.58587	6.40097	6.2902	6.41226	6.47432	6.71663	6.60563	6.67065	6.58407	6.70036	6.53307	6.49132	6.26494	6.30818	6.55783	6.25741	6.23832	6.77131	CLM75_RS04250	5.95278	5.93033	6.28805	6.33696	5.82281	6.24154	6.23306	6.40763	6.41327	5.83465	6.01415	5.96243	5.9566	6.32421	6.27311	6.31877	6.29333	5.98986	6.55106	6.01421
	CLM75_RS04255	7.9488	7.9615	8.00119	7.64923	7.88012	7.95799	7.76769	7.9905	8.06335	7.55199	7.72623	8.12755	7.78816	7.91835	7.78575	8.09752	7.90368	7.8536	7.8025	7.9287	CLM75_RS04255	7.33211	6.91127	7.42752	7.03096	6.91584	7.78821	6.75705	7.30675	7.35198	6.98524	7.17642	7.22252	7.13782	7.49687	6.88078	6.89638	7.5243	7.03643	6.95718	6.82133
	CLM75_RS04260	7.4345	7.47178	8.07017	7.80854	7.23325	8.02535	7.50529	8.1115	7.55038	8.12961	7.83148	7.9896	7.47513	7.86484	7.33021	7.16196	7.53354	7.13012	7.66586	8.68853	CLM75_RS04260	8.65809	8.47396	8.85933	9.33981	8.13342	9.19746	8.87746	9.14816	9.05981	8.56508	8.68342	8.45697	8.79224	8.94902	8.99353	9.24162	9.22103	8.6227	9.30761	8.27597
	CLM75_RS04265	6.93099	7.7695	7.2291	7.28209	6.93154	6.84461	7.91743	7.08824	8.03918	7.4411	7.67257	7.71061	7.92949	7.15395	6.94889	7.16712	7.13433	7.57944	6.92653	7.86108	CLM75_RS04265	6.72844	6.80555	6.58532	6.78101	6.76926	6.44153	6.811	6.39576	6.46548	6.36367	6.48486	6.68611	6.49142	6.63692	6.77164	6.74088	6.56738	6.41446	6.78744	6.71433
	CLM75_RS04270	6.527	7.16915	6.95618	7.12343	6.41746	6.11258	7.3218	6.7178	7.51116	7.65082	7.79585	7.45079	7.29112	6.44858	6.34404	6.71549	6.47094	7.28694	5.97062	7.8798	CLM75_RS04270	8.08919	7.4928	7.52552	7.70544	7.6877	7.64728	7.61589	7.79723	7.77453	7.90767	8.0013	7.62882	7.53277	7.68092	7.17913	7.51026	7.577	7.47135	7.52058	7.67003
	CLM75_RS04275	8.35184	8.79815	8.58763	8.29926	8.50831	8.98063	8.46423	8.58359	8.74857	8.30229	8.7583	8.26146	8.63564	8.38388	8.33242	8.21111	8.19942	8.54792	8.81349	8.50135	CLM75_RS04275	7.11654	7.43799	7.21802	7.14586	7.42131	7.21915	7.3034	7.2203	7.21797	7.33306	7.31213	7.37612	7.28245	7.16134	7.22661	7.16728	7.33895	7.34609	7.27424	7.30655
	CLM75_RS04280	7.96313	7.68282	8.00473	7.98884	8.15477	8.38072	7.97836	8.21307	8.00334	7.95374	7.58421	8.44689	7.91493	8.30341	8.07614	8.03167	8.11406	8.04543	7.88793	8.19364	CLM75_RS04280	7.3985	8.07493	7.83534	7.60859	7.46698	7.637	7.76602	7.62719	7.58338	7.09902	7.28748	7.81034	7.99869	7.67849	8.2638	7.65166	7.96234	7.59084	7.71857	7.73834
	CLM75_RS04285	5.21665	5.53527	5.4771	6.07138	5.04792	6.16023	6.02628	5.76669	5.89837	5.99579	5.20272	5.65202	6.21923	5.67685	5.31519	5.49562	5.24369	5.86703	5.96539	5.83562	CLM75_RS04285	4.68292	4.90555	4.76143	4.67262	4.43339	4.40309	4.91887	4.60969	4.46104	4.60587	4.45258	4.5092	4.70577	4.6068	4.78847	4.68119	4.4017	4.44967	4.80216	4.67628
	CLM75_RS04290	6.80229	7.0229	7.18677	7.22206	6.91925	7.33552	6.98732	7.47098	7.12236	7.35681	6.50569	7.0287	7.09415	7.31216	6.72147	7.14637	6.77106	6.97862	7.53486	6.71141	CLM75_RS04290	6.25009	6.64638	6.2703	6.42217	6.30488	5.97232	6.50041	6.07123	6.29646	6.06871	6.28521	6.08125	5.54985	6.16423	6.52967	6.47643	6.19846	6.23614	6.53332	6.33977
	CLM75_RS04295	7.21432	7.34575	7.13504	7.63555	7.18664	8.24716	7.33377	7.50933	7.4543	7.48174	6.89743	6.85581	7.6815	7.6343	7.40503	7.20904	7.2988	7.4314	8.08583	6.58618	CLM75_RS04295	5.81794	6.8127	6.39479	6.45184	6.36201	5.53575	6.78493	5.88899	5.91118	6.04737	5.97532	6.21655	6.10041	6.12111	7.17106	6.66422	5.89547	6.43822	6.6476	6.55634
	CLM75_RS04300	6.53391	6.2795	6.57088	6.82345	6.28503	6.98736	6.19981	6.33865	5.99997	6.44331	5.69059	6.23125	6.32578	6.5135	6.21049	6.123	6.49688	5.86362	6.89325	6.06408	CLM75_RS04300	4.63883	5.21588	5.17538	4.88967	4.81051	5.07735	5.07475	4.91536	4.8827	4.86444	4.82389	4.48623	4.73912	5.11352	5.74412	5.02066	4.63231	4.88736	5.19551	4.97165
	CLM75_RS04305	5.54489	6.79564	6.29119	5.67057	5.58133	5.19449	6.53138	6.11291	6.36199	5.66921	5.84005	6.6389	6.36256	6.01508	5.59013	6.40439	5.76778	6.37505	5.05987	6.94667	CLM75_RS04305	7.00325	6.3612	6.97396	5.58612	6.44674	7.56255	5.54753	6.78875	6.90122	6.494	6.90751	6.95394	7.28433	6.92556	5.44617	5.60228	7.33374	6.6382	5.72757	6.19381
	CLM75_RS04310	8.17054	8.68068	8.39787	8.31165	7.98532	8.20835	8.89449	8.63839	8.81998	8.40971	8.20233	8.62949	8.8134	8.57698	7.91622	8.50358	8.38548	8.81467	8.14923	8.62357	CLM75_RS04310	7.80082	8.10176	8.13568	8.49223	7.86042	7.83538	8.41331	8.02038	7.94441	8.18112	8.00301	7.97414	8.06376	7.79008	8.35387	8.50388	7.91711	8.01691	8.37753	8.02858
	CLM75_RS04315	9.98535	10.2894	10.0643	10.9719	10.0382	11.9253	10.9286	10.5442	10.6189	10.8869	9.37193	10.3157	11.2812	10.8526	10.15	10.2918	10.3381	10.8808	11.6352	9.76841	CLM75_RS04315	9.30807	10.7156	10.1604	10.2321	9.88099	9.17997	10.3652	9.95301	9.92272	9.85088	9.72665	9.91489	10.0734	9.94264	11.0037	10.3299	9.68915	10.1767	10.4821	10.4851
	CLM75_RS04320	10.3123	10.1934	10.2415	11.0794	10.2889	12.1017	10.5	10.8898	10.4765	11.0186	9.27441	10.1413	10.8267	11.0001	10.2373	10.4543	10.3984	10.4464	11.8773	9.56508	CLM75_RS04320	9.02823	10.2523	9.62146	10.0047	9.49231	8.59294	10.1397	9.46678	9.42942	9.45096	9.30131	9.62883	9.39621	9.50303	10.6233	10.0532	9.30312	9.77073	10.2587	9.93262
	CLM75_RS04325	9.22647	9.30842	9.48922	9.17486	9.38664	9.39209	9.36521	9.47395	9.3711	9.44591	9.57504	9.70752	9.5247	9.46764	9.22113	9.11115	9.41433	9.17417	9.90339	9.69663	CLM75_RS04325	8.20292	8.62842	8.46927	8.7687	8.60669	7.83842	8.99952	8.18001	8.20221	8.43494	8.27206	8.6583	8.5608	8.42317	9.05373	8.83236	8.09461	8.63792	8.8543	8.8919
	CLM75_RS04330	10.231	9.54779	10.2622	9.95612	10.4011	10.012	9.03588	10.2787	9.88477	10.1329	10.8642	9.7406	9.53798	10.0327	10.3909	9.35652	10.0794	9.03492	10.1751	9.74441	CLM75_RS04330	9.04819	9.15055	9.30377	9.70553	9.44661	9.10466	9.78702	9.23465	9.3383	9.34825	9.30761	9.65804	9.66668	9.23238	9.64685	9.72508	9.60145	9.45565	9.76932	9.76928
	CLM75_RS04335	10.8681	9.599	10.5959	10.5663	10.9387	10.5715	9.41987	10.7388	9.7939	10.449	11.5879	10.2421	9.95884	10.5679	10.704	9.92242	10.7554	9.60817	10.6024	10.4189	CLM75_RS04335	9.27351	9.49856	9.69454	9.8331	9.80511	9.3307	9.9252	9.63882	9.58353	9.64688	9.62315	9.79896	9.94199	9.45426	9.85096	9.90773	9.78613	9.71738	9.93777	9.95938
	CLM75_RS04340	7.22851	7.19796	7.51966	7.36463	7.3462	7.87171	7.48979	7.63091	7.2295	7.36406	7.25682	7.21003	7.54224	7.56826	7.22129	7.23255	7.34064	7.40933	7.64964	7.22964	CLM75_RS04340	6.56352	6.97285	6.67312	6.46214	6.46827	6.30994	6.64316	6.71021	6.63142	6.76108	6.47943	6.66004	6.71741	6.56968	7.12377	6.70125	6.63445	6.70372	6.82674	6.61737
	CLM75_RS04345	7.6579	7.64045	7.85494	7.82671	7.64993	8.35338	7.82917	7.97215	7.63988	7.78761	7.69236	7.61733	7.7356	7.88656	7.56169	7.51795	7.90963	7.68195	8.17098	7.78434	CLM75_RS04345	7.20991	7.65129	7.32591	7.2907	7.27272	6.86744	7.34859	7.41579	7.20182	7.59189	7.18945	7.48518	7.4877	7.01566	7.67256	7.51455	7.17317	7.45494	7.40164	7.50221
	CLM75_RS04350	6.70645	6.70848	6.87467	7.03534	6.74772	7.08935	6.74838	7.00695	6.77655	7.02361	6.6653	7.05566	6.77424	7.11137	6.67415	6.89248	6.64733	6.69779	7.3208	6.88021	CLM75_RS04350	5.89979	6.34019	6.21525	6.12973	6.35788	5.95427	6.14768	6.03359	5.89538	6.01146	5.98608	6.13209	5.87393	5.75318	6.0069	6.15353	5.84572	6.01747	6.01381	6.21465
	CLM75_RS04355	6.30998	6.02102	6.16241	5.67057	6.41084	5.61328	5.65247	5.89087	5.72521	5.5133	6.52915	5.81648	5.79899	5.83124	6.35971	5.70564	6.55901	5.58197	5.77055	5.76076	CLM75_RS04355	5.45139	5.3853	5.73624	5.45526	6.17061	5.3822	5.15835	5.90662	5.81372	5.77358	6.07518	5.32029	5.45268	5.70195	5.29475	5.54739	5.28851	5.81332	5.33816	5.88664
	CLM75_RS04360	10.2375	9.3357	9.86615	8.68864	10.4443	8.7624	8.80811	8.86746	8.98129	8.78597	10.4319	8.93774	8.70941	8.86202	10.0845	9.11881	10.1974	8.64157	8.80065	8.8471	CLM75_RS04360	8.35614	8.9751	9.26805	8.88591	9.89435	7.91316	8.97715	9.39139	9.29457	9.70995	9.68727	7.86564	8.18871	9.13847	8.7146	8.93805	7.95927	9.4443	8.61107	9.80524
	CLM75_RS04365	2.53012	2.95915	3.21933	2.73423	2.81486	2.39198	3.17314	2.53362	3.02705	2.84416	2.69279	2.53668	2.5633	2.67049	2.88562	2.84844	2.12004	3.33784	2.63722	3.08477	CLM75_RS04365	2.64873	2.54355	2.48356	2.23258	2.73256	2.78163	2.33635	2.58032	2.64662	2.5778	2.80508	2.2972	2.18035	2.46214	2.58914	2.92815	2.56021	2.48701	2.74689	2.62213
	CLM75_RS04370	2.71188	2.74735	2.92445	2.97243	2.68908	2.3672	2.70725	2.80431	2.76038	2.78508	3.0137	2.96623	2.62331	2.45883	2.55164	2.97251	2.62516	2.9668	2.54672	3.2807	CLM75_RS04370	3.49966	3.02329	2.93088	3.26202	3.54709	3.43329	2.95066	3.26637	3.19416	2.92532	3.45855	3.12737	2.18035	3.04211	2.10436	3.08262	3.30455	2.92403	3.01119	2.92768
	CLM75_RS04375	4.49928	4.52777	4.27147	4.17175	4.57756	4.42273	4.23423	4.32516	4.32026	4.08222	4.5851	4.4415	4.34657	4.39464	4.49435	4.45139	4.42403	4.42206	4.39744	4.58403	CLM75_RS04375	3.59163	3.60761	3.76836	3.56397	3.82547	4.06799	3.53832	3.81817	3.82597	3.76116	3.7495	3.32809	3.70892	3.30572	3.401	3.49042	3.82591	3.74906	3.55806	3.83196
	CLM75_RS04380	4.76627	4.88136	4.80499	4.61411	4.82543	4.47584	4.78668	4.89881	4.76128	4.63588	4.80989	5.10111	4.76307	4.74263	4.56272	4.82959	4.71029	4.84101	4.6268	4.99694	CLM75_RS04380	4.38175	4.32085	4.45966	4.42884	4.45346	4.63674	4.5698	4.53007	4.48855	4.62904	4.56144	4.40279	4.98134	4.72254	4.11535	4.66001	4.62922	4.28819	4.6394	4.19814
	CLM75_RS04385	5.81354	5.82778	5.68079	5.43127	5.83074	5.91893	5.83048	5.73081	5.77241	5.53831	5.69844	5.88415	5.8873	5.72999	5.70703	5.77191	5.7277	5.89614	5.95017	5.84804	CLM75_RS04385	4.71474	4.69299	4.36852	4.71735	4.53103	4.70182	4.66434	4.51381	4.60393	4.45197	4.56144	4.65284	3.87815	4.42015	4.88535	4.58893	4.54313	4.55777	4.53052	4.59481
	CLM75_RS04390	6.98593	6.62584	6.75152	6.45378	7.19245	6.08673	6.28241	6.57097	6.43835	6.67915	7.45756	6.47469	6.0485	6.41515	6.80799	6.5717	7.03396	6.37355	6.35669	6.66198	CLM75_RS04390	6.49051	6.15008	6.11786	6.44105	6.19531	6.60902	6.46363	6.32092	6.2851	6.5775	6.36512	6.45785	6.40748	6.25698	6.47174	6.47219	6.38875	6.17334	6.37491	6.14629
	CLM75_RS04395	6.0472	5.67275	5.98599	5.95454	6.11145	5.87016	5.62695	5.79432	5.71071	6.01929	6.30613	5.82887	5.57611	5.81683	5.97896	5.74756	5.91736	5.86916	5.91382	5.88647	CLM75_RS04395	4.94542	5.0191	4.72181	4.91749	4.84298	4.86302	5.069	4.74384	4.66328	4.84972	4.63166	4.76926	4.98134	4.73923	4.57272	4.92623	4.76501	4.88966	4.951	4.71668
	CLM75_RS04400	4.30677	3.01075	3.89812	3.96087	4.27182	3.96906	3.30773	4.36155	3.06859	3.81992	4.58389	3.83476	3.68315	3.99299	4.313	3.69062	4.32703	3.46716	4.03423	3.97643	CLM75_RS04400	3.59505	3.83373	3.70474	3.67017	3.87258	3.8302	3.56716	3.84442	3.67961	3.3655	3.664	3.7841	4.09974	3.94657	3.83806	3.94216	3.50678	3.83512	3.77036	4.07923
	CLM75_RS04405	8.59071	7.09676	8.27465	7.86214	8.73484	8.33333	7.27783	8.68172	6.84969	7.8723	8.74245	7.77533	7.44297	8.46942	8.75182	8.01036	8.52254	7.23703	8.54193	7.60611	CLM75_RS04405	6.5065	7.28575	6.94097	7.36638	6.88417	6.27786	7.43131	6.85298	6.89469	6.5901	6.85228	7.01191	6.9176	6.84785	7.68465	7.34156	6.60485	7.17607	7.47363	7.21268
	CLM75_RS04410	7.56156	6.59606	7.43717	7.48114	7.60917	7.70932	7.09508	7.62676	7.18285	7.56202	7.32743	6.90926	7.38782	7.68163	7.77668	6.8941	7.41743	6.88387	7.69495	6.65423	CLM75_RS04410	6.31639	7.19139	6.53095	6.81098	6.48081	6.06231	6.92241	6.40956	6.51709	6.2838	6.47943	6.47546	6.35466	6.54319	7.02428	6.77945	6.07663	6.63785	6.88995	6.84522
	CLM75_RS04415	5.59865	5.5967	5.58949	5.92746	5.45454	6.61922	6.15368	5.84233	5.94186	6.0152	5.39653	5.5785	6.32804	6.12941	5.59814	5.29878	5.85397	6.17685	6.21058	5.49309	CLM75_RS04415	5.28759	5.69053	5.46661	5.39545	5.27118	5.11988	5.50452	5.2787	5.09442	5.03242	5.1049	5.32678	4.98134	5.25661	5.55557	5.41708	4.95481	5.11478	5.30075	5.42773
	CLM75_RS04420	8.74228	8.83842	8.8382	9.55594	8.76057	9.91032	9.36165	9.15438	9.52144	9.60856	8.50813	8.71904	9.56315	9.35692	8.6249	8.72937	8.67923	9.2352	9.67554	8.28518	CLM75_RS04420	7.75431	9.04713	8.10071	8.2865	8.03089	7.13352	8.54223	8.01704	7.91026	7.93872	7.77953	8.17633	7.91605	7.86019	8.75867	8.26829	7.67547	8.15418	8.44023	8.46373
	CLM75_RS04425	6.37882	6.35224	6.41559	6.93207	6.49692	7.47069	6.48604	6.81579	6.74274	7.01735	6.22342	6.18315	7.05383	6.8783	6.47466	6.24976	6.32855	6.83177	7.29207	6.00321	CLM75_RS04425	5.5133	6.5598	5.73624	5.77582	5.93488	5.34438	6.19793	5.47205	5.60738	5.48542	5.59527	5.74977	6.02129	5.79669	6.58689	6.04658	5.5298	5.93022	6.06172	5.9388
	CLM75_RS04430	6.67042	5.52588	6.04288	6.23771	6.72882	6.38937	5.32084	6.16876	5.70083	5.84912	6.48086	5.50545	5.87424	6.14556	6.4131	5.69014	6.39686	5.48922	6.46856	5.19269	CLM75_RS04430	4.36981	4.97375	4.40233	4.90062	4.68414	4.14677	5.09752	4.39454	4.2302	4.5644	4.41439	4.92476	4.72809	4.43303	5.31685	4.98192	4.59476	4.86533	4.98087	4.88921
	CLM75_RS04435	6.01358	5.7263	5.80986	6.05001	5.93666	6.30953	6.07323	6.09741	5.94589	5.88952	6.02538	5.68353	6.21984	6.14761	5.90536	5.92327	5.74658	6.0557	6.30609	5.76731	CLM75_RS04435	5.01734	5.42212	5.14074	5.22974	5.3157	5.16582	5.21411	4.91999	5.00462	4.60587	5.02067	5.21591	4.91479	5.14047	5.47594	5.32452	4.98173	5.39857	5.51596	5.12761
	CLM75_RS04440	7.05577	6.96051	6.90289	7.08083	6.94241	7.0534	6.8998	7.19546	6.88483	7.01443	7.08412	6.89881	6.63907	7.08692	6.90608	6.92462	7.15528	6.76473	7.1215	6.78203	CLM75_RS04440	6.17088	6.56921	6.33783	6.57922	6.08102	6.3091	6.37671	6.44831	6.468	6.16102	6.33356	6.37349	6.22334	6.25553	6.62578	6.40342	6.42664	6.32721	6.50717	6.36372
	CLM75_RS04445	8.5433	8.57437	8.55726	8.37299	8.62423	8.37014	8.33699	8.42687	8.49738	8.17569	8.73245	8.4029	8.49956	8.46076	8.30849	8.38018	8.523	8.59705	8.62177	8.27049	CLM75_RS04445	7.57028	7.79379	7.68049	7.66302	7.67873	7.75854	7.71102	7.77202	7.72887	7.6525	7.73054	7.71997	7.74601	7.67551	7.92848	7.77846	7.86351	7.90709	7.86853	7.69215
	CLM75_RS04450	7.72478	7.62863	7.80434	7.51142	7.96608	7.76269	7.74902	7.72024	7.28598	7.69517	7.55963	8.24621	7.47105	7.80927	8.24582	8.12383	7.63806	7.91043	7.51947	8.47226	CLM75_RS04450	7.55827	7.27357	7.29587	7.35138	7.5342	7.64331	7.48086	7.3069	7.40379	7.45881	7.65596	7.58251	7.34877	7.31084	6.95078	7.5694	7.5063	7.30337	7.4896	7.15259
	CLM75_RS04455	7.2829	7.90786	7.75809	7.13108	7.60979	7.4696	8.04625	7.31061	7.5788	7.5691	7.50694	7.90608	7.69969	7.53564	8.00941	7.89344	7.39267	8.2102	7.39098	8.07453	CLM75_RS04455	7.55652	7.43786	7.52552	7.59928	7.55033	7.51373	7.35835	7.50333	7.58106	7.55153	7.66436	7.53116	7.6659	7.4984	7.24306	7.51425	7.34792	7.47595	7.41405	7.47146
	CLM75_RS04460	7.83476	8.12333	7.87522	8.02374	7.58688	8.95345	8.34614	8.30315	8.05828	8.07495	7.18578	8.12486	8.3086	8.39119	7.60286	8.08407	8.18353	8.31059	8.83563	7.96264	CLM75_RS04460	6.74317	7.63861	7.43306	7.37926	7.15207	6.61545	7.57793	7.15085	7.10579	6.86719	6.93792	7.03634	7.06077	7.05703	8.09231	7.49673	6.77608	7.17418	7.49331	7.25032
	CLM75_RS04465	6.51088	7.58701	7.14688	6.4619	6.56457	6.96998	7.63756	6.73293	7.14748	6.94972	6.62996	7.467	7.39079	7.00896	6.93582	7.21143	6.47409	7.63217	7.04945	7.2004	CLM75_RS04465	7.45752	7.09451	7.2661	7.49497	7.18977	7.29852	7.38347	7.50988	7.45031	7.43641	7.54128	7.39282	7.65575	7.38133	7.45641	7.4615	7.37401	7.24281	7.44376	7.15505
	CLM75_RS04470	2.36929	2.64493	2.53703	2.72976	2.61196	2.75398	3.03507	2.55473	2.22829	4.31173	2.55624	3.17462	2.30389	2.6613	2.52602	2.82138	2.52667	2.68293	3.02465	3.20163	CLM75_RS04470	4.54284	4.21331	4.38552	4.38619	5.24584	3.46062	4.32646	4.24371	4.23316	4.53711	4.33483	2.03752	3.13826	4.76595	2.51459	4.05357	3.06928	3.98678	2.96069	4.91026
	CLM75_RS04475	3.77293	4.49983	4.41497	4.69089	3.89969	3.86893	4.52941	4.16505	3.93118	5.98599	4.36455	5.25454	4.28752	4.06268	3.80254	4.16251	3.93924	4.31991	4.36073	4.86996	CLM75_RS04475	5.80174	5.37406	5.36909	5.91733	6.12755	4.91005	5.52251	5.35485	5.48857	5.57315	5.49011	4.10389	4.21485	6.00427	4.43801	5.46977	4.54313	5.29391	4.58599	5.75575
	CLM75_RS04480	1.73935	3.36313	3.13484	3.74073	2.42922	2.46385	3.58017	3.08631	2.38629	5.25334	2.7239	4.9162	3.64747	2.83474	2.41873	3.02879	2.95954	3.16837	3.32251	4.2137	CLM75_RS04480	4.96142	4.73039	4.89213	5.11846	5.4681	4.47188	4.71124	4.78846	4.71818	4.8571	4.8153	3.43396	3.6863	5.35465	3.19363	4.73486	3.66613	4.53297	3.7684	5.13558
	CLM75_RS04485	2.94767	4.10957	3.48979	4.23149	2.96196	3.03528	4.25511	3.64771	3.3582	5.67033	3.24575	5.73142	3.94362	3.62839	3.21873	3.79166	3.59721	3.79201	3.25551	4.46654	CLM75_RS04485	5.76118	5.50977	5.45296	5.82965	6.19927	5.04259	5.30985	5.44551	5.53067	5.62016	5.60528	4.22335	4.83478	5.95421	3.95544	5.52237	4.56271	5.31203	4.6394	5.94335
	CLM75_RS04490	4.59498	5.25076	4.91041	4.46333	4.83112	4.07995	5.31232	4.53977	5.08345	4.95381	4.71132	5.20247	4.75639	4.48982	4.50094	4.83973	4.59697	5.31023	4.29182	4.96537	CLM75_RS04490	5.59078	5.41639	5.26817	5.23359	5.91331	5.55631	5.01918	5.18232	5.3618	5.56266	5.45844	4.98132	4.9906	5.55884	4.82493	5.14252	5.13347	5.20989	4.85565	4.91953
	CLM75_RS04495	6.11795	6.87978	6.31779	6.24282	6.12481	5.99216	6.55051	6.60257	6.9384	6.08199	5.94137	6.45028	6.27758	6.21978	5.92558	6.54438	6.41304	6.56985	6.04303	6.18696	CLM75_RS04495	5.14776	5.54311	5.39619	5.1101	5.3765	5.27336	5.44139	5.13659	5.12979	5.17895	5.01917	5.50454	5.73206	5.19139	5.50832	5.31777	4.9938	5.28433	5.32358	5.15139
	CLM75_RS04500	7.05577	7.41322	7.45361	7.63151	7.02282	7.25614	8.13232	7.36441	7.80991	7.6276	6.9385	7.66497	8.01789	7.30683	7.00352	7.53696	7.17109	7.83139	7.19981	7.54697	CLM75_RS04500	6.72376	7.06803	6.83323	6.65375	6.60459	6.90606	6.74898	6.6596	6.75161	6.39948	6.53546	6.69303	6.72019	6.84159	6.90044	6.65916	6.78027	6.49787	6.8424	6.69491
	CLM75_RS04505	7.26508	7.28255	7.45661	7.64567	7.14932	7.00026	7.69532	7.60815	7.65037	7.53833	7.27738	7.68773	8.07138	7.57317	7.16825	7.33336	7.45202	7.59612	6.68237	7.66747	CLM75_RS04505	7.51579	7.35159	7.46741	6.91964	7.14318	7.5557	6.78844	7.17222	7.27113	7.01137	7.35605	7.4801	7.75555	7.54779	6.89677	6.73126	7.28693	7.046	6.9016	7.31841
	CLM75_RS04510	11.0321	11.4288	11.1177	11.2679	10.7638	9.6158	11.0154	11.0104	11.6013	11.2868	11.4096	11.7632	10.9638	10.7657	10.6012	10.9673	11.0243	10.9091	9.24115	11.9099	CLM75_RS04510	11.3092	10.5432	11.6263	11.5984	10.5707	11.8254	11.2524	11.8207	11.5378	11.078	11.4546	11.3211	11.5381	11.6146	11.3247	11.4803	11.6037	11.0099	11.3602	10.8717
	CLM75_RS04515	7.83389	7.9508	7.97845	8.49668	7.8958	8.51428	8.31691	8.4173	8.29408	8.38465	7.74855	8.03172	8.12312	8.40879	7.95609	8.00122	8.07445	7.99524	8.21853	7.90498	CLM75_RS04515	7.20684	7.73333	7.60753	7.37796	7.42441	7.33836	7.57286	7.44261	7.34002	7.15447	7.35516	7.43206	7.20101	7.4106	7.58342	7.3853	7.05774	7.39183	7.48812	7.54098
	CLM75_RS04520	8.10688	7.90179	7.94628	8.15431	8.0675	8.58658	8.16913	8.39076	7.83143	8.21055	7.67626	8.05618	8.03594	8.318	8.04084	8.03633	8.19704	7.85972	8.62325	7.76155	CLM75_RS04520	6.65286	7.28718	6.93694	7.18743	6.81348	6.45519	7.22736	6.79129	6.84308	6.80561	6.79398	6.90388	6.73955	6.78443	7.20504	7.21636	6.53717	6.96324	7.23636	7.14324
	CLM75_RS04525	9.49408	9.33543	9.47693	9.21686	9.47476	9.8581	9.35069	9.6574	9.2095	9.30772	9.37971	9.20446	9.32419	9.52408	9.35824	9.37137	9.56007	9.44079	9.97339	9.24562	CLM75_RS04525	7.87026	8.18439	8.15317	8.33215	7.92271	7.91041	8.32411	8.17023	8.0635	7.90915	8.01694	7.89375	8.05716	8.06004	8.61218	8.35554	8.0077	8.0836	8.36772	8.11475
	CLM75_RS04530	9.1403	9.29584	9.05819	8.96263	9.26387	9.5926	8.98137	9.39262	9.15748	8.64464	9.21004	8.91863	9.40354	9.36614	9.32946	9.06953	9.39294	9.34108	9.68689	8.88849	CLM75_RS04530	6.9461	7.53026	7.5926	7.43032	7.54488	7.23793	7.67006	7.39374	7.23265	7.36187	7.22265	7.19798	7.24424	7.40636	8.0161	7.70848	7.35776	7.56301	7.59875	7.55368
	CLM75_RS04535	7.83126	7.44814	7.49339	7.45428	7.69679	7.94836	7.21413	7.82188	7.43811	7.45442	7.44144	7.3362	7.32342	7.70613	7.5066	7.38355	7.62876	7.38855	8.09051	7.21821	CLM75_RS04535	6.07975	6.33826	6.22473	6.34722	6.19795	5.83806	6.56311	6.17957	6.11904	6.30463	6.25247	6.15231	6.22727	6.13458	6.90409	6.32786	6.02933	6.29199	6.48739	6.25361
	CLM75_RS04540	7.47863	7.47938	7.32784	7.51223	7.39065	8.03042	7.72021	7.60626	7.58279	7.64366	7.21442	7.48052	7.68525	7.81173	7.41553	7.34092	7.35045	7.79198	8.22268	7.22608	CLM75_RS04540	5.84766	6.66844	6.22709	6.34054	6.17665	5.75278	6.52266	5.93208	5.93364	6.01476	5.89357	6.02953	6.10468	5.99213	6.64046	6.4486	5.75359	6.23207	6.39184	6.25636
	CLM75_RS04545	8.31881	8.50333	8.29897	8.25724	8.39407	9.15484	8.64646	8.44312	8.51903	8.43034	8.138	8.22009	8.54098	8.51738	8.21368	8.36015	8.2275	8.71402	9.29508	8.20152	CLM75_RS04545	7.24438	7.73782	7.38376	7.64486	7.48306	6.9124	7.74409	7.39471	7.4087	7.54241	7.23688	7.55792	7.33611	7.32646	7.99283	7.7162	7.3754	7.61398	7.72072	7.67756
	CLM75_RS04550	7.69597	7.7218	7.76996	7.59509	7.90475	8.34538	7.37285	7.91785	7.80931	7.59875	7.50439	7.23283	7.88345	7.85908	7.97988	7.44208	7.78429	7.5528	8.40245	7.21821	CLM75_RS04550	6.32878	6.81211	6.655	6.64328	6.63858	6.24198	6.84041	6.49798	6.49476	6.56028	6.35329	6.77708	6.57691	6.66721	6.90774	6.77379	6.51557	6.74146	6.9147	6.83302
	CLM75_RS04555	8.64831	8.01962	8.48884	8.49281	8.75039	8.95993	7.87482	8.73664	8.19245	8.46743	8.48586	8.29117	8.29251	8.69638	8.7401	8.19726	8.79471	8.1003	8.78828	8.11349	CLM75_RS04555	7.68674	7.67219	7.96234	7.98679	7.67185	7.67234	7.89856	8.15573	8.00193	7.71643	7.88351	7.91783	8.06156	7.97253	8.02564	7.94426	7.89796	7.75423	8.07747	7.99722
	CLM75_RS04560	9.13149	8.45874	8.88785	8.73708	9.10525	9.21688	8.43854	9.14041	8.3244	8.77747	8.9977	8.82328	8.71524	9.03911	9.09939	8.73867	9.14125	8.60831	9.24157	8.75375	CLM75_RS04560	8.20838	8.28177	8.46957	8.55056	8.30915	8.32629	8.49115	8.45946	8.43778	8.3726	8.36981	8.49037	8.75536	8.31998	8.63105	8.53723	8.52366	8.36083	8.53193	8.52226
	CLM75_RS04565	7.07101	6.69623	6.94692	6.60001	7.05474	7.40678	6.69753	7.1095	6.52379	6.59428	6.82831	7.00979	6.84013	7.0993	6.88659	6.96664	6.98401	6.911	7.43579	6.8382	CLM75_RS04565	6.15241	6.48644	6.41647	6.2859	6.34242	6.05236	6.52791	6.39132	6.43014	6.23556	6.29018	6.4197	6.44838	6.18647	6.61244	6.29492	6.54376	6.43074	6.36134	6.58281
	CLM75_RS04570	6.45686	6.96359	6.78526	6.89959	6.6296	7.64636	7.66499	6.79006	7.35871	6.9919	6.52063	6.76023	7.82096	7.08864	6.61188	6.77517	6.6083	7.71854	7.53956	6.63178	CLM75_RS04570	5.59677	6.82866	6.20235	6.19642	6.13171	5.18598	6.47618	5.93437	6.00982	6.18857	5.819	5.9759	5.7702	5.96045	6.93181	6.46151	5.74505	6.40765	6.50687	6.45809
	CLM75_RS04575	8.72548	8.49231	8.63261	9.1013	8.74334	9.48435	8.75045	8.99931	8.87378	9.18535	8.57661	8.12181	8.89183	9.03356	8.83574	8.46266	8.70593	8.40232	9.34136	7.73789	CLM75_RS04575	7.09917	8.39141	7.68479	7.96537	7.69871	6.70104	8.05816	7.57071	7.56368	7.52399	7.53789	7.59766	7.45294	7.48454	8.39818	8.05704	7.21862	7.89641	8.11894	8.18459
	CLM75_RS04580	7.98174	7.49248	7.94918	8.39071	7.97525	8.56589	7.74401	8.07741	7.91888	8.27309	8.09636	7.54493	8.49329	8.01301	8.13388	7.78031	7.81567	8.1443	8.38634	7.63577	CLM75_RS04580	6.4029	7.30489	6.95784	7.0016	6.75676	6.8125	7.07864	6.70462	6.67424	6.81574	6.65107	6.64001	6.77482	6.85313	7.19414	7.00685	6.69041	7.0385	6.95932	6.99672
	CLM75_RS04585	6.94565	6.11168	6.73457	7.00282	7.04652	7.16475	6.32042	6.93128	6.2266	6.84382	6.98923	6.10312	6.5316	6.80225	7.10368	6.41913	6.83002	6.13818	7.18238	5.98646	CLM75_RS04585	5.08585	5.70427	5.42197	5.45278	5.27494	5.01929	5.43693	5.37749	5.44264	5.10238	5.37667	4.84346	5.08008	5.22733	5.56176	5.42023	5.19541	5.36341	5.5545	5.56977
	CLM75_RS04590	7.52753	6.14092	7.13911	7.28685	7.62009	7.36222	6.3481	7.39131	6.15369	7.10492	7.67896	6.46905	6.48688	7.14079	7.53882	6.89139	7.43353	6.23744	7.40886	6.00043	CLM75_RS04590	4.86831	5.48264	5.35793	5.77582	5.14253	4.97574	5.67885	5.56672	5.49351	5.28121	5.19247	5.13512	5.45937	5.40651	5.82861	5.67537	5.49285	5.39695	5.80021	5.42448
	CLM75_RS04595	6.92509	6.73461	7.13809	6.62401	7.07733	7.23918	6.54719	7.04444	6.71485	6.49219	7.0933	6.42254	6.71601	6.89578	7.01668	6.87257	6.7002	6.57403	7.45686	6.32216	CLM75_RS04595	6.08949	6.42323	6.06975	6.2397	6.30856	5.87126	6.38425	6.06357	6.03971	6.08765	6.18335	6.44003	6.18352	6.12825	6.10967	6.24244	6.30597	6.41845	6.32421	6.41618
	CLM75_RS04600	5.85762	6.06096	6.23396	6.07887	5.75877	6.69148	6.43041	6.32745	6.2816	6.03349	5.82936	5.87053	6.43655	6.29521	6.04403	6.05542	5.95527	6.01398	6.81236	5.94023	CLM75_RS04600	5.90601	6.29411	6.08804	5.92151	5.82794	5.62101	5.99989	6.03715	6.02142	5.99928	5.87052	6.34184	6.22334	6.10107	6.23105	5.97505	5.84971	6.13701	6.02205	6.22682
	CLM75_RS04605	5.57202	5.1715	5.6092	6.17124	5.49805	6.65708	5.65976	5.8207	5.4406	6.23081	5.25309	5.24401	5.77025	5.9679	5.53147	5.68702	5.64683	5.76095	6.53008	5.04519	CLM75_RS04605	4.46828	5.60344	5.17831	5.38422	4.89932	4.6592	5.33042	4.87932	4.7963	4.91008	4.76797	4.84572	5.34848	4.75983	5.87405	5.4284	4.85511	4.88044	5.63667	4.91953
	CLM75_RS04610	4.9021	3.81345	4.57383	4.74175	4.89355	5.27495	4.16498	4.51306	4.03494	4.80291	4.57173	3.58655	4.00975	4.62235	4.74366	4.50197	4.5259	3.79381	5.15177	3.77267	CLM75_RS04610	3.53929	4.19153	3.58618	3.72322	3.70419	3.64932	4.0599	3.46551	3.68394	3.7974	3.84381	3.52132	2.88375	3.69176	4.1811	3.93159	3.62325	3.76919	4.00606	3.34
	CLM75_RS04615	4.89674	5.16511	5.08099	5.00218	4.77326	5.51308	5.40266	4.95811	5.20897	5.06185	4.72127	5.08792	5.3846	5.07213	4.69275	4.99208	5.11481	5.53661	5.45523	5.04087	CLM75_RS04615	4.3638	4.78633	4.55895	4.58784	4.41532	4.17638	4.50527	4.449	4.2302	4.45197	4.32517	4.5092	4.50067	4.37012	4.96683	4.42404	3.82591	4.5152	4.48002	4.75081
	CLM75_RS04620	8.46314	9.0117	8.91106	8.60328	8.59854	9.41555	8.97323	8.94288	8.88169	8.31694	8.55213	8.82007	9.19019	8.74577	8.73368	9.13544	8.54952	9.28863	9.10434	8.61941	CLM75_RS04620	6.99161	7.64441	7.68822	7.56452	7.84595	7.07944	7.78609	7.40205	7.44042	7.2969	7.55037	7.39475	7.59633	7.51757	7.97672	7.67917	7.40508	7.87596	7.72262	7.75266
	CLM75_RS04625	9.96262	9.38435	9.49902	9.64451	9.7811	9.86403	9.2326	9.71387	9.2269	9.49469	9.09067	9.37285	9.17695	9.98894	9.54217	9.49692	10.0351	9.13908	10.1028	8.89994	CLM75_RS04625	7.14455	8.12325	7.83951	8.17443	7.79292	6.97456	8.40535	7.62435	7.5968	7.64435	7.57782	7.71009	7.52323	7.60184	8.48616	8.26934	7.17104	7.99771	8.23246	8.17761
	CLM75_RS04630	6.35948	6.96195	6.5943	6.86304	6.40799	7.33033	6.96802	6.4856	6.89913	6.72346	6.38054	6.68487	7.28707	6.88645	6.77791	6.74549	6.481	6.9723	7.32057	6.44537	CLM75_RS04630	5.52501	6.30203	6.06659	6.15332	6.13998	5.4459	6.5137	5.83234	5.77971	5.82966	5.79734	5.87557	5.62314	5.87051	6.58841	6.28665	5.73213	6.04817	6.35582	6.41945
	CLM75_RS04635	3.79037	3.45446	3.99117	3.40152	3.65894	3.20916	3.32759	3.5841	3.22372	3.26951	3.65148	4.12316	3.11111	3.52585	3.35009	3.84637	3.38067	3.75381	3.4209	4.34915	CLM75_RS04635	4.4495	3.78448	3.99581	3.49821	3.72268	4.17821	3.61134	4.23009	4.09684	4.1773	4.13933	4.37178	3.51718	3.93936	3.81753	3.57661	4.20391	3.76418	3.37479	3.69846
	CLM75_RS04640	7.75173	8.1409	8.12185	8.39822	7.76498	8.5442	8.38786	8.21113	8.39922	8.6084	7.63755	8.19469	8.42446	8.241	7.90856	8.12591	7.8138	8.55799	8.32663	8.32058	CLM75_RS04640	7.10758	7.68382	7.22512	7.39548	7.29882	6.92581	7.50688	7.24082	7.24058	7.30636	7.24715	7.31915	7.35236	7.29046	7.49974	7.41737	7.28693	7.39366	7.38274	7.38761
	CLM75_RS04645	4.41563	4.27959	4.36253	4.52657	4.60435	4.01962	3.7579	3.60786	3.88929	5.24937	4.34324	4.87073	4.06218	4.13745	4.52701	4.14443	5.19106	3.93547	4.54967	4.15294	CLM75_RS04645	4.08097	3.80693	4.04588	3.81354	4.2	3.68065	3.66569	3.96893	4.04725	3.39958	4.06876	3.72644	3.91752	4.10306	3.59439	3.56298	3.93511	3.56559	3.14384	3.94963
	CLM75_RS04650	7.30656	7.21163	7.24619	7.22841	7.36664	8.21053	7.11602	7.31989	7.1126	7.18969	7.32978	6.86271	7.09878	7.26328	7.34567	7.12624	7.12193	7.12389	8.09703	7.09574	CLM75_RS04650	4.73038	5.33432	4.91339	4.83491	5.49953	4.75676	5.39274	4.68333	4.75879	4.88142	4.91199	5.22114	4.96264	5.0295	4.85041	5.08009	4.67492	5.11968	4.83431	5.34595
	CLM75_RS04655	8.65368	7.66531	8.21497	8.05703	8.78703	8.29895	7.73355	8.1809	7.81314	8.11285	8.69488	7.78422	7.69358	8.03807	8.66873	7.84612	8.63931	7.63317	8.1858	8.03026	CLM75_RS04655	7.62885	7.46949	7.69642	7.42738	7.38984	7.82388	7.40759	7.68518	7.74113	7.30591	7.5483	7.4596	7.41217	7.74404	7.69735	7.51882	7.67021	7.54725	7.49567	7.24711
	CLM75_RS04660	5.81283	5.46879	5.40452	5.10677	5.81362	4.6296	4.86737	5.39851	5.29752	5.16499	6.18401	5.54029	4.75471	5.08163	5.45954	5.37442	5.92888	4.92036	4.5023	5.59237	CLM75_RS04660	6.23864	5.39908	5.82681	5.46185	5.88404	6.36563	5.1918	6.06182	5.99027	5.85199	6.05122	5.88549	6.26973	6.16037	5.18685	5.48912	6.24566	5.59107	5.20349	5.88782
	CLM75_RS04665	5.87543	5.59776	5.79187	5.68623	5.81649	5.0531	5.40734	5.66842	5.70523	5.57167	6.04707	5.89933	5.22552	5.5839	5.52243	5.6199	5.86505	5.44423	5.04562	5.96381	CLM75_RS04665	6.49281	5.71999	5.88537	5.87662	6.02701	6.11679	5.58528	6.04778	5.87989	6.22988	6.1282	6.14316	6.0437	5.88277	5.36362	5.70152	5.91971	5.68212	5.38039	6.06099
	CLM75_RS04670	5.35878	5.51419	5.34348	5.54255	5.2555	5.63614	5.64062	5.452	5.61972	5.71885	5.27501	5.48436	5.39647	5.5033	4.89643	5.54951	5.29018	5.67934	5.81905	5.65661	CLM75_RS04670	5.20151	4.89286	5.04873	4.79764	4.64978	4.86075	4.87341	4.79604	4.80428	4.89821	4.84938	4.95017	4.71697	4.93486	4.84535	4.94035	5.08464	4.56498	4.77027	4.6598
	CLM75_RS04675	5.53458	5.71905	5.36566	5.44838	5.53246	5.04531	5.56259	5.42837	6.08591	5.49958	5.60724	5.84376	5.67423	5.7631	5.55319	5.18752	5.52029	5.56998	5.57759	6.01206	CLM75_RS04675	4.8541	3.91126	4.48986	4.79764	3.54709	5.20944	4.56163	4.09178	4.01666	3.77161	4.25825	4.68851	4.75006	4.48344	4.31892	4.72571	5.53476	4.43558	4.73565	4.11594
	CLM75_RS04680	7.74504	7.64006	8.01916	8.05245	7.83647	8.44438	7.82643	8.21694	7.73843	8.15376	8.12401	7.78467	7.81856	8.19489	8.03699	7.87615	7.99642	7.68134	8.32515	7.64398	CLM75_RS04680	7.23069	7.67328	7.70846	8.06634	7.42526	7.2247	7.94462	7.70702	7.69894	7.5572	7.74011	7.48554	7.52642	7.62111	8.06753	8.00664	7.46917	7.8382	8.01965	7.83541
	CLM75_RS04685	4.96742	5.22026	5.27974	4.61774	5.0467	5.71742	5.32578	5.35203	5.16869	4.68739	4.75501	5.07907	5.36386	5.38133	5.12095	5.49562	4.94632	5.32458	5.68616	4.86019	CLM75_RS04685	4.70685	5.18132	4.97648	5.12781	5.2573	4.75799	5.12825	4.95354	4.97752	4.74492	5.1259	4.72332	5.22837	5.09742	5.10028	5.33325	4.56918	5.13818	5.32757	5.14153
	CLM75_RS04690	6.6266	6.78595	6.62994	6.4962	6.73603	7.04439	6.92283	6.55141	6.71084	6.71862	6.54417	6.46679	6.89021	6.72885	6.56517	6.8398	6.57436	6.95095	7.34696	6.41898	CLM75_RS04690	5.40437	5.97457	5.61169	6.05492	5.66544	5.1007	6.03865	5.47416	5.3919	5.67962	5.50408	5.71436	5.5747	5.34514	6.25414	5.93637	5.626	5.89916	5.99344	5.94335
	CLM75_RS04695	5.2348	5.86724	5.55638	5.69084	4.98304	5.52223	6.06354	5.82216	5.96098	5.64751	5.16678	5.77595	5.56276	5.72283	4.88941	5.81198	5.31358	5.85075	5.22461	5.61143	CLM75_RS04695	4.60528	4.55296	4.44838	4.62206	4.41077	4.26002	4.25229	4.5768	4.65448	4.38889	4.45921	4.13007	4.11675	4.26742	4.51014	4.47709	4.64461	4.15111	4.56247	4.38019
	CLM75_RS04700	6.8732	6.86562	6.72015	6.71195	7.10456	7.23811	6.95395	6.74178	6.9215	6.72721	6.95428	6.55301	6.97218	6.55315	7.02859	6.87065	6.80897	7.15843	7.22896	6.99186	CLM75_RS04700	5.02371	5.3042	4.89451	5.02036	4.84972	4.86416	5.3507	4.61542	4.99854	5.13309	5.01317	4.96063	5.34126	4.84904	5.23408	5.02316	5.1807	5.4431	5.13379	5.20538
	CLM75_RS04705	6.01605	5.68123	5.94082	6.15381	6.11378	5.76028	5.65864	5.83372	5.8011	6.26561	6.7184	5.67375	5.76527	5.74038	6.14299	5.86484	6.11392	5.66323	5.89315	5.97631	CLM75_RS04705	6.40924	6.59823	6.29572	6.32346	6.9098	6.21459	6.67142	6.34352	6.17475	6.64583	6.52811	6.24762	6.62825	6.05098	5.94673	6.3164	6.18589	6.44215	6.12576	6.69559
	CLM75_RS04710	7.86661	7.27795	7.46879	7.37595	7.84035	7.48371	7.23755	7.4349	7.58806	7.20116	8.18247	6.91632	7.34975	7.06728	7.56185	7.17671	8.11718	7.06845	7.2367	7.40754	CLM75_RS04710	8.31276	7.70308	7.99068	7.76623	8.09331	8.10499	7.92327	8.10964	7.99138	8.15093	8.07462	8.12634	8.02146	8.02176	7.44558	7.75355	7.93694	7.95853	7.59089	8.33252
	CLM75_RS04715	7.22291	6.43896	6.9442	6.93814	7.34073	7.12927	6.44574	6.88237	6.76449	6.77854	7.8215	6.28231	6.7471	6.49553	7.28148	6.49565	7.45967	6.36844	6.78755	7.09156	CLM75_RS04715	7.91596	7.36692	7.6465	7.32249	7.75391	7.71379	7.50847	7.68835	7.67098	7.69772	7.6075	7.68854	7.76638	7.78682	7.14761	7.37119	7.57299	7.71082	7.04584	7.95394
	CLM75_RS04720	7.13524	7.23334	7.38297	7.64745	7.11246	6.91281	7.25543	7.24528	7.41134	7.62837	7.19869	7.30203	6.95185	7.08306	6.85221	7.18933	6.95995	7.43068	6.85321	7.57973	CLM75_RS04720	7.87502	7.53987	7.40851	7.51866	7.64763	7.82986	7.31377	7.54656	7.55705	7.81758	7.69655	7.53396	7.34516	7.69141	7.09101	7.41547	7.63249	7.42829	7.29817	7.45165
	CLM75_RS04730	7.74485	6.59633	7.34704	6.52682	7.89648	5.53688	5.39731	6.82451	6.83906	6.46122	8.21783	6.41669	5.17504	6.18615	7.81355	6.56049	7.72497	5.29891	5.09649	6.6676	CLM75_RS04730	6.87607	6.29637	6.61554	6.23394	6.23963	7.36413	5.54857	6.93331	7.08812	6.24402	6.79398	6.34024	6.46176	6.84303	5.91327	6.11668	7.22836	6.58809	6.21428	5.93081
	CLM75_RS04735	5.30925	5.50185	5.62864	5.43676	5.28686	5.09708	5.68031	5.68607	5.65347	5.4477	5.20508	5.85505	5.59683	5.59298	5.16145	5.68264	5.66293	5.35892	5.24778	5.67484	CLM75_RS04735	5.62048	5.06373	5.42444	5.43197	5.21352	5.52644	4.93792	5.57654	5.44838	5.19844	5.41017	5.54262	5.40499	5.34922	5.36008	5.21258	5.34802	4.89883	5.14363	4.71403
	CLM75_RS04740	9.05287	9.49301	9.63229	9.51018	9.07736	9.90935	9.65082	9.45729	9.64745	9.61275	9.41499	9.30404	9.47957	9.26573	9.21518	9.08621	9.10666	9.45241	9.47154	9.85313	CLM75_RS04740	8.99307	9.28778	9.18008	9.07749	9.19076	8.97005	9.0531	9.21486	9.12917	9.21032	9.05105	9.23692	9.12587	9.04549	9.31262	9.02658	9.11575	9.16814	9.1379	9.38609
	CLM75_RS04745	5.87475	6.33811	6.38791	6.82371	6.04699	7.02225	6.76772	6.52713	6.6376	6.94206	5.88301	6.51575	6.78413	6.68562	6.29558	6.24	5.96022	6.60272	6.7184	6.23408	CLM75_RS04745	5.86761	6.54938	6.20091	6.44438	6.15572	5.81117	6.2195	6.17505	6.2332	6.06659	6.16655	6.13302	6.49468	6.03839	6.52018	6.39223	6.2202	6.29763	6.47575	6.6287
	CLM75_RS04750	6.69569	7.16025	6.93408	7.04977	6.69844	7.55538	7.43757	7.06114	7.1662	7.14312	6.56211	7.06541	7.70859	7.30443	6.70957	6.99668	6.94686	7.54908	7.59838	6.89585	CLM75_RS04750	5.95544	6.59754	6.43333	6.3212	6.17933	6.16836	6.37263	6.32413	6.32518	6.06659	6.09378	6.15413	6.37248	6.15026	6.63754	6.28872	6.08906	6.40001	6.46854	6.44852
	CLM75_RS04755	6.6009	6.8391	6.53321	6.51971	6.49155	7.00277	6.75075	6.68427	6.66551	6.19257	6.43392	6.87981	7.12367	7.02404	6.52273	6.64972	6.77745	6.926	6.99515	6.27374	CLM75_RS04755	5.48499	6.07939	6.15205	5.84611	6.19993	5.62572	6.00742	5.79372	5.74333	5.4452	5.88292	5.75097	5.93757	5.62096	6.343	5.92842	5.54464	5.98772	5.95526	6.06413
	CLM75_RS04760	8.62775	8.21812	8.42676	8.22105	8.65879	8.5606	8.17599	8.60325	8.4088	8.32639	8.63096	8.1911	8.41269	8.59624	8.74926	8.04147	8.49729	8.39702	8.59069	8.32281	CLM75_RS04760	7.80452	8.03846	7.81446	7.98579	7.82771	7.81919	7.99911	7.76549	7.89294	7.72687	7.64072	7.94652	8.1323	7.88548	8.09711	7.91169	8.04269	7.95304	7.98828	8.05009
	CLM75_RS04765	6.90055	7.38844	6.94808	6.98111	6.7723	7.20878	7.2166	7.05806	7.37995	6.67989	7.07661	6.96201	7.33075	6.97946	6.90931	7.08773	7.00681	7.44188	7.0034	7.12	CLM75_RS04765	6.00389	6.02263	6.056	5.85051	5.93567	6.16375	5.82672	6.15094	5.92497	5.95299	5.78683	5.79254	5.88391	5.92351	6.06029	5.76441	5.91718	5.84626	5.78045	5.87359
	CLM75_RS04775	9.30684	9.39375	9.43338	9.32528	9.20641	9.70292	9.12143	9.5999	9.38359	8.99324	9.28943	9.39182	9.16241	9.63432	9.05809	9.4066	9.26339	9.19697	9.52777	9.42338	CLM75_RS04775	8.15052	8.30512	8.57117	8.4793	8.19214	8.3747	8.39203	8.59225	8.54058	8.20034	8.49309	8.47677	8.42052	8.46281	8.80893	8.48186	8.48634	8.41593	8.64685	8.12204
	CLM75_RS04780	8.49273	8.50227	8.6098	8.51823	8.58578	8.45425	8.33445	8.59234	8.4822	8.38968	8.66528	8.39385	8.41905	8.53885	8.46169	8.57349	8.51392	8.6397	8.30999	8.59153	CLM75_RS04780	7.56287	7.65505	7.61998	7.68112	7.5775	7.73276	7.78346	7.65792	7.72572	7.53629	7.73784	7.50067	7.66011	7.72767	7.78652	7.67455	7.63673	7.77444	7.87933	7.48361
	CLM75_RS04785	7.2557	7.09657	7.18349	6.85254	7.42511	7.00629	6.89482	7.30101	7.11577	6.80632	7.35324	7.01212	6.84997	7.26726	7.05301	7.15543	7.38164	7.0666	7.06719	7.11744	CLM75_RS04785	6.43477	6.4328	6.52443	6.47319	6.50931	6.67404	6.68605	6.55943	6.42173	6.66557	6.4029	6.37662	6.40055	6.19859	6.91982	6.4876	6.65664	6.41885	6.65397	6.18232
	CLM75_RS04790	8.87663	9.016	9.03752	9.0549	8.85415	9.11744	8.73825	9.11739	9.08733	9.03975	9.05338	9.06656	8.89962	9.18145	8.83306	8.94312	8.86027	8.94437	9.19503	9.03144	CLM75_RS04790	8.05884	8.05656	8.05467	8.24605	8.13842	8.26537	8.28062	8.15614	8.07767	7.89638	8.15908	7.87949	7.81801	8.1626	8.64531	8.27178	8.11796	8.19253	8.4058	8.00104
	CLM75_RS04795	9.05129	8.79803	9.12113	8.93491	9.12476	9.01043	8.69898	8.95988	8.90965	9.11849	9.3696	9.00456	8.76521	8.96563	8.93355	8.8887	8.76145	8.94866	8.97193	9.02687	CLM75_RS04795	8.94358	8.54633	8.6739	8.82758	8.55734	9.02824	8.64302	8.76895	8.81311	8.73371	8.73138	8.49847	8.65263	8.73543	8.62146	8.72814	8.84496	8.68039	8.77609	8.36657
	CLM75_RS04800	9.41575	8.92296	9.37523	9.18867	9.37544	9.29726	8.88232	9.42505	9.10695	9.32665	9.78646	9.24627	9.00945	9.25437	9.28514	9.17104	9.17217	8.94941	9.29705	9.39838	CLM75_RS04800	9.10338	8.84753	9.00812	9.16674	9.03841	9.24823	9.00282	9.13592	9.12778	8.98769	9.07402	8.93752	8.94713	9.04842	9.06575	9.11428	9.34824	8.99033	9.15592	8.8231
	CLM75_RS04805	8.38354	8.13374	8.45861	8.28323	8.4059	8.39419	8.17306	8.41826	8.43837	8.30993	8.73169	8.45104	8.46781	8.46604	8.31027	8.37902	8.32962	8.30376	8.52593	8.52522	CLM75_RS04805	7.43334	7.40263	7.38207	7.55338	7.48955	7.49842	7.47571	7.49079	7.54341	7.50494	7.49143	7.51067	7.5872	7.52511	7.76859	7.507	7.76694	7.48947	7.67002	7.55256
	CLM75_RS04810	9.27068	8.80176	9.26091	8.78569	9.33339	9.01972	8.75334	9.15985	8.80055	8.97428	9.77275	9.18627	8.75036	9.14392	9.20245	9.07348	9.18333	8.82677	9.14886	9.18622	CLM75_RS04810	8.6231	8.70513	8.4871	8.55864	8.56196	8.49287	8.64809	8.51349	8.61861	8.5937	8.6382	8.65718	8.64532	8.51053	8.63178	8.63105	8.67658	8.68842	8.64178	8.59215
	CLM75_RS04815	8.3268	8.05384	8.49534	8.19787	8.40411	8.27813	7.90981	8.13768	8.13848	8.24341	8.89777	8.12145	7.98182	8.16555	8.30651	8.26325	7.9906	8.04722	8.40985	8.15618	CLM75_RS04815	7.88833	7.75215	7.57232	7.62519	7.82407	7.64413	7.70616	7.58695	7.73397	7.77603	7.93302	7.6638	7.59936	7.82397	7.61127	7.74867	7.74139	7.78991	7.71743	7.6297
	CLM75_RS04820	7.72384	7.45921	8.03455	7.7757	7.70242	7.68994	7.33412	7.60836	7.55617	7.82484	8.43204	7.61274	7.61124	7.58975	7.73927	7.70552	7.44578	7.57436	7.78644	7.78321	CLM75_RS04820	7.09827	7.21362	6.97817	7.02263	6.97834	7.18359	7.08471	7.07582	7.18224	6.9914	7.17272	6.90551	6.75865	7.1528	7.27069	6.9447	7.14476	7.02993	7.15223	6.91632
	CLM75_RS04825	8.88967	8.43275	9.10509	8.98626	8.74287	8.80734	8.50364	8.75262	8.54337	9.0395	9.59981	8.8356	8.61536	8.68446	8.80084	8.68816	8.5034	8.35851	8.67748	8.87785	CLM75_RS04825	8.81584	8.5211	8.56736	8.78398	8.63173	8.97933	8.49705	8.67387	8.75291	8.57593	8.75247	8.38561	8.37351	8.7366	8.60621	8.59383	8.65944	8.44428	8.65521	8.49697
	CLM75_RS04830	9.00187	8.36327	9.00675	8.74444	8.73399	8.7861	8.45861	8.58627	8.39282	8.73579	9.49256	8.71082	8.59079	8.59247	8.7631	8.6242	8.43554	8.55581	8.72709	8.78347	CLM75_RS04830	8.03147	8.11355	8.05081	8.16285	8.10216	8.24477	8.15157	8.15917	8.14845	8.09118	8.18966	7.96612	8.11653	8.10581	8.29847	8.14534	8.12347	8.09747	8.21954	8.07205
	CLM75_RS04835	8.53675	8.09429	8.57378	8.0829	8.29681	8.16913	7.78959	8.09148	7.88068	8.1354	9.01863	8.12378	7.84439	8.04944	8.31018	8.18349	7.94978	7.92432	8.26551	8.22111	CLM75_RS04835	8.19476	7.8723	7.93314	7.98393	7.92531	8.51377	7.90119	8.18868	8.12822	8.0815	8.10545	7.85335	8.08553	8.21239	8.04011	8.0485	8.40687	8.17472	8.14894	7.77802
	CLM75_RS04840	8.49151	8.44401	8.66627	8.29671	8.21795	8.66045	8.36144	8.47115	8.20906	8.35206	8.8872	8.56275	8.1944	8.45363	8.29509	8.42814	8.11406	8.23996	8.65311	8.62059	CLM75_RS04840	8.07072	8.20189	8.10238	8.0662	8.34599	8.07127	8.21965	8.09614	8.1059	8.10571	8.14217	7.99667	7.92332	8.08902	8.14269	8.14429	7.91171	8.1354	8.10409	8.19177
	CLM75_RS04845	9.41925	8.96291	9.63078	9.28193	9.51033	9.58427	9.20584	9.74238	8.88625	9.50244	10.1654	9.49525	9.10306	9.51598	9.62085	9.30287	9.45367	8.79408	9.75234	9.4038	CLM75_RS04845	10.708	9.90016	10.3688	10.6365	10.4987	10.3892	10.335	10.5524	10.6226	10.5285	10.6871	10.4293	10.4997	10.6054	10.1006	10.5106	10.5343	10.3845	10.4429	10.6168
	CLM75_RS04850	9.45965	9.15416	9.43676	9.34575	9.41364	10.2938	9.48906	9.70996	9.3332	9.50941	9.54926	9.22301	9.4783	9.69047	9.39222	9.43244	9.3423	9.50199	10.3491	9.13102	CLM75_RS04850	8.97873	9.28568	9.14456	9.3318	9.1337	8.57464	9.38722	9.06485	9.08291	9.25766	8.88837	9.25583	9.03087	9.01465	9.54732	9.49564	8.97928	9.34973	9.49485	9.26951
	CLM75_RS04855	6.31199	5.92091	6.03562	6.04597	6.27984	5.73931	5.73124	5.95844	5.97257	5.97761	6.37809	6.10385	5.64377	5.78652	6.2478	5.99414	6.44099	5.82465	5.71968	6.50343	CLM75_RS04855	5.19137	4.90183	4.92855	5.13298	5.09223	5.39879	4.81964	4.96105	4.95708	5.05398	5.07496	5.11653	4.58868	5.33694	5.0217	4.90387	5.04342	5.01611	4.91432	4.82906
	CLM75_RS04860	6.55532	5.9567	6.53114	6.45005	6.70271	7.32812	6.40327	7.15052	6.26358	6.73326	5.39584	6.28552	6.59104	6.93418	7.22129	6.61862	6.76644	6.35878	7.31007	5.64171	CLM75_RS04860	5.18116	5.02458	5.15172	5.23359	4.99672	5.02235	5.14064	5.29544	5.15498	5.30658	4.95175	5.24529	5.25935	5.24935	5.48248	5.26122	5.11369	5.16501	5.23924	4.79172
	CLM75_RS04865	5.51287	5.62543	5.55841	5.57283	5.59057	5.40312	6.00133	5.57421	5.75943	5.40954	5.81447	5.90017	5.56468	5.32282	5.51659	5.85709	5.57413	5.92262	5.2449	6.15983	CLM75_RS04865	5.01095	4.89211	4.82764	4.56202	4.64008	5.15935	4.5074	4.83338	5.05064	4.87901	4.80838	4.95437	4.21485	4.85671	4.39016	4.25491	4.98173	4.73963	4.44983	4.55377
	CLM75_RS04870	6.70759	5.86462	6.09622	5.63931	6.61403	5.36295	5.63891	6.09261	5.73205	5.62318	6.63055	6.19549	5.48706	5.7918	6.34404	6.17068	6.62794	5.90405	5.42167	6.61044	CLM75_RS04870	5.69971	5.5531	6.02541	5.06862	5.12039	5.98388	4.73503	5.82164	6.02056	5.46786	5.91223	5.734	6.57998	5.85145	5.09602	5.15544	6.08794	5.83197	5.1735	5.37821
	CLM75_RS04875	6.41158	6.48786	6.50456	6.29786	6.45475	6.01726	6.36398	6.33357	6.3606	6.26364	6.45096	6.65637	6.25108	6.34087	6.29672	6.63004	6.25574	6.53165	6.16365	6.67389	CLM75_RS04875	6.7366	6.25498	6.36252	6.31257	6.50664	6.72095	6.20581	6.34754	6.39125	6.6004	6.56652	6.51574	6.62825	6.45374	5.9181	6.34356	6.5698	6.29069	6.1349	6.1002
	CLM75_RS04880	3.31994	3.49352	3.33272	2.94182	3.03271	3.18101	3.58017	3.02207	3.3224	3.27147	3.47725	3.60724	3.46684	2.94104	3.23146	3.60594	2.98095	3.55865	3.38304	3.36261	CLM75_RS04880	2.90185	2.83014	2.84496	2.66241	2.74709	2.77196	2.54126	2.83059	2.49707	2.55379	3.23446	2.62632	2.36258	2.87847	1.71802	2.69393	2.70821	2.63694	2.43791	2.89988
	CLM75_RS04885	5.34508	5.52032	5.31136	5.42229	5.07212	6.38976	5.88891	5.53313	5.71253	5.68656	4.80989	5.90268	5.80548	5.83431	5.04812	5.63617	5.60031	6.04745	6.63594	5.4915	CLM75_RS04885	4.1384	4.5577	4.33214	4.64828	3.89232	3.45157	4.76379	3.93116	3.69687	4.07134	3.89038	4.03034	3.63997	4.07045	5.41576	4.77679	3.26525	3.9365	4.5049	4.16348
	CLM75_RS04890	3.48605	4.39694	3.89491	3.58355	3.73971	3.85117	4.32168	3.91591	4.24678	3.5157	3.63052	4.11452	4.66655	4.01299	3.68476	4.16789	3.74221	4.72824	3.9211	4.14692	CLM75_RS04890	2.94541	2.956	2.98989	2.60406	3.14815	3.26776	3.01786	3.19167	3.16965	2.84844	3.07654	2.85878	2.96116	2.84801	3.24064	2.95623	2.54716	3.00264	3.05677	2.50399
	CLM75_RS04895	2.97334	5.33477	3.6657	4.32192	3.18692	3.41053	5.64175	4.16047	5.63054	4.42865	3.66069	4.82024	6.00546	4.01299	3.48385	4.49199	3.45141	5.82728	3.93544	4.02755	CLM75_RS04895	2.85694	3.06912	2.70565	3.07275	2.72525	3.22589	2.77816	2.94416	3.25657	2.68118	2.93136	2.94558	0.353599	2.91565	3.14503	2.81771	3.2811	3.09723	3.19133	2.30638
	CLM75_RS04900	3.17261	3.4047	3.25479	3.37312	2.80334	2.92924	3.25243	3.68967	4.12519	3.53213	3.46151	3.48738	2.95057	3.71529	3.2566	3.18908	3.28634	3.53525	3.3655	3.78047	CLM75_RS04900	4.28335	3.21535	3.66072	3.79801	2.95527	4.33907	3.47016	3.40067	3.45467	3.71318	3.47174	4.04614	4.36482	3.84227	3.22514	3.68335	4.16173	3.46737	3.49322	3.26207
	CLM75_RS04905	5.64889	5.16084	5.3645	5.98113	5.27335	5.24551	5.37226	5.60826	5.87059	5.80248	5.62147	5.7923	5.77108	5.88894	5.50155	4.83072	5.58291	5.374	5.82291	6.13825	CLM75_RS04905	5.14892	4.52615	4.69477	5.1926	4.01738	5.20855	5.0132	4.24124	4.13531	4.09233	3.83022	4.9269	5.18868	4.94389	5.13802	5.06566	5.10259	4.60892	4.95014	4.58029
	CLM75_RS04910	6.27944	6.64867	6.46076	6.39674	6.1981	6.46393	6.83935	6.28175	6.64563	6.42539	6.11695	6.67804	6.70867	6.50871	6.25756	6.60447	6.03123	6.76907	6.72048	6.5368	CLM75_RS04910	5.73427	6.07014	5.68083	5.73426	5.83391	5.81412	5.76583	5.60752	5.61193	5.80698	5.66582	5.78785	5.60516	5.72727	5.53999	5.85435	5.79557	5.8042	5.82159	5.54456
	CLM75_RS04915	7.27904	6.75011	7.07749	7.66102	7.05747	7.26015	7.01622	7.18816	7.19657	7.62942	7.1537	6.89629	7.02771	7.28045	7.0176	7.00272	7.13214	6.83917	6.80717	6.93566	CLM75_RS04915	7.00453	6.48097	6.79332	6.52482	6.48569	7.20283	6.1381	6.78283	6.67397	6.38934	6.57978	6.43778	6.46841	6.84496	6.47665	6.44582	6.46877	6.32975	6.39565	6.00446
	CLM75_RS04920	4.83088	5.27733	5.11997	4.71372	5.08525	4.80358	4.94286	4.81671	5.06817	4.80562	5.07669	5.19702	5.02878	4.97539	4.94363	5.14995	5.07968	5.19138	4.79612	5.31759	CLM75_RS04920	4.77029	4.25356	4.40233	4.44555	4.34069	4.92975	4.12231	4.74819	4.67748	4.63191	4.62184	4.67333	4.8952	4.69714	4.609	4.58331	4.7846	4.55921	4.51076	4.32551
	CLM75_RS04925	4.29461	5.56308	4.77565	4.30999	4.18573	4.1847	5.18207	4.83264	5.46889	4.72503	4.20045	5.39915	5.5308	4.73389	4.61104	4.81937	4.52225	5.19138	3.88216	5.5738	CLM75_RS04925	5.94944	5.0239	5.34233	4.57575	5.49846	6.26413	4.05409	5.1199	5.30737	5.53533	5.39986	5.87778	6.11319	5.37215	4.40399	4.50112	5.86687	4.97554	4.73264	4.63753
	CLM75_RS04930	3.2291	4.49644	3.76742	2.97243	3.45693	3.50725	4.17127	3.66399	4.16935	3.21967	3.48764	3.6715	4.94749	3.44251	3.12627	3.80554	3.77936	4.60284	3.25932	3.58661	CLM75_RS04930	3.43237	3.15663	3.29722	3.12349	3.33757	3.48153	2.60621	3.11289	3.36847	3.54675	3.17658	3.19978	2.41855	3.49942	3.12846	2.75115	3.13179	3.03209	2.84295	2.14206
	CLM75_RS04935	1.58808	1.59266	0.872468	0.984668	0.470567	0.491385	1.8284	1.14094	1.7211	1.02408	0.922351	1.67819	2.68092	1.03068	0.425582	1.22657	0.563257	1.65353	0.410341	1.51432	CLM75_RS04935	1.33334	1.22755	1.84168	0.419008	1.74492	2.30003	0.44792	1.59404	1.49197	1.44259	1.49387	1.26072	2.80194	1.99068	0.653046	1.237	1.4948	1.39559	1.10182	0.959834
	CLM75_RS04940	4.06082	4.84628	4.32727	4.118	4.09654	4.14152	4.71743	4.50042	4.96442	4.15827	3.97149	4.51778	5.11098	4.60448	4.37459	4.5175	4.35327	4.64022	4.01185	4.53573	CLM75_RS04940	5.5133	5.15968	5.19674	5.24509	5.04893	5.60068	4.93476	5.2372	5.19651	5.12496	5.05903	5.3056	5.06262	5.37882	4.99909	5.06808	5.14217	4.89081	4.70325	4.71136
	CLM75_RS04945	3.55907	4.09918	3.4201	3.89649	3.81906	3.59523	3.90106	3.61458	3.85936	3.98056	3.61163	3.69101	4.41607	3.47695	3.8068	3.91411	3.55023	4.13268	3.64683	4.16292	CLM75_RS04945	4.18229	3.74516	3.65792	3.94629	3.74455	4.1355	3.85466	3.73293	3.95884	3.97517	3.79218	4.04221	3.70892	3.70457	3.8583	3.82332	3.81506	3.91181	3.88492	3.80722
	CLM75_RS04950	1.90855	2.55656	2.40798	2.57879	2.73224	2.59234	2.68544	2.6753	2.75756	2.69166	2.16103	2.41993	2.85369	2.47988	2.44084	2.35211	2.38926	2.85437	2.32505	2.69159	CLM75_RS04950	2.16855	1.91142	2.06922	1.98986	1.80167	2.32007	1.6197	1.97279	1.58757	2.68118	2.23291	1.57574	1.63627	1.85942	1.80401	2.06679	1.54817	1.9393	1.82082	1.65777
	CLM75_RS04955	4.23644	4.7318	4.97562	4.62499	4.019	4.6152	4.98097	4.99976	4.65848	4.82774	3.97704	4.88605	4.47629	4.58397	3.71455	4.94481	4.41619	4.71788	4.7935	4.91905	CLM75_RS04955	3.37777	3.62757	3.4602	3.18847	3.28381	3.43329	3.77214	3.40948	3.30238	3.56489	3.72033	3.29542	3.70892	3.64381	3.5453	3.59458	3.42356	3.51285	3.42284	3.20262
	CLM75_RS04960	4.84902	5.36606	5.00567	5.02426	4.44672	4.67447	5.3784	5.08326	5.45807	5.21621	4.45341	5.28695	5.08588	5.07818	4.47172	5.19456	4.74721	5.33878	4.70001	5.16715	CLM75_RS04960	3.93465	4.37229	4.12901	4.2596	4.00535	3.9657	4.21112	4.3076	4.23464	4.12121	4.02768	3.99415	4.18288	4.05387	4.17304	4.21915	4.03662	3.9365	4.34479	4.02877
	CLM75_RS04965	3.70102	4.10512	4.29112	4.47273	3.45325	4.62438	4.67931	4.3912	4.53056	4.46845	3.66299	4.55445	4.6065	4.4937	3.82162	4.22407	4.01559	4.40102	4.38531	4.57061	CLM75_RS04965	3.2138	3.38482	2.84987	3.08561	2.93638	3.03298	3.23367	2.96823	2.98184	2.61309	2.81891	2.74723	2.75923	3.04882	3.72136	3.02744	2.78801	3.05686	3.05998	3.26207
	CLM75_RS04970	0.769529	1.09165	0.342476	-0.276646	0.686568	0.468272	0.353584	0.239969	0.287043	0.556289	0.322983	0.585094	0.410756	-0.339361	0.511639	0.183623	0.465358	0.47257	-0.80476	0.630862	CLM75_RS04970	1.95074	0.990348	0.958422	0.936735	1.2693	1.39434	0.706779	1.61706	1.3021	2.46645	1.405	1.02595	-1.10772	1.26287	-0.0493716	1.64326	0.897235	1.06203	1.26609	0.886175
	CLM75_RS04975	5.11539	4.88827	5.19361	4.84977	5.16166	5.32244	4.90088	5.26717	4.9026	5.01937	5.91562	5.09233	5.07383	5.19895	5.30166	4.90991	5.02059	4.91954	5.17714	5.13	CLM75_RS04975	8.72493	8.49133	9.39015	9.83072	9.40651	8.77492	9.18852	10.3639	10.2298	10.1087	10.4254	7.91191	8.52778	9.20963	9.45813	9.62235	8.60343	9.43552	9.87035	8.96332
	CLM75_RS04980	2.68106	3.13511	3.31363	3.10956	2.67651	3.20916	3.32477	3.46276	3.18437	3.80377	3.11104	3.56556	3.12155	3.40448	2.68262	2.89676	2.89708	3.20928	3.34058	3.17428	CLM75_RS04980	7.33672	7.28089	7.83735	8.4791	7.89425	7.27369	8.03991	8.76305	8.71412	8.82995	8.867	6.6779	6.76945	7.64925	8.08374	8.34529	7.10525	8.00992	8.56456	7.38928
	CLM75_RS04985	2.91095	3.43571	3.56436	2.9875	2.58531	3.26388	3.60362	3.38238	3.60713	3.30818	3.1541	3.40944	3.58472	3.1492	2.97544	3.31404	2.94508	3.58169	3.27067	3.60721	CLM75_RS04985	5.84479	6.86312	6.97957	7.64667	6.79526	5.89427	7.13991	7.55192	7.63465	7.68499	7.64193	5.73887	5.73206	6.53664	7.66252	7.50908	6.17427	7.19106	7.90982	6.61665
	CLM75_RS04990	3.27523	3.84754	4.00313	3.72284	3.3462	3.85785	3.77453	3.63124	3.82746	3.46698	3.54352	3.98141	4.02929	3.80768	3.52582	3.64248	3.24268	3.6186	3.83704	3.96279	CLM75_RS04990	5.75278	7.31653	7.50544	8.09204	7.23844	5.74168	7.47626	7.7966	7.96592	8.08177	7.83501	5.7156	5.67001	6.70382	8.42641	7.82727	6.10807	7.86226	8.41012	7.02381
	CLM75_RS04995	2.69346	3.21427	3.32797	2.86233	2.72615	3.62427	3.361	3.51756	3.33947	3.23981	3.14099	3.46035	3.39979	3.43175	2.51042	2.93513	3.01595	3.21197	3.25551	3.85372	CLM75_RS04995	6.03509	7.0725	7.35491	7.71546	6.84968	5.62706	7.07972	7.68688	7.7972	7.64151	7.57477	6.10972	5.54358	6.69315	8.17834	7.4912	6.05836	7.61363	8.07777	6.82442
	CLM75_RS05000	3.31593	2.97547	3.22955	2.94182	2.61855	3.57102	3.18873	3.33842	3.14392	2.96524	3.11104	3.30188	2.87853	3.49516	3.00911	2.96428	3.06357	3.17114	3.22081	3.68679	CLM75_RS05000	6.2711	7.45484	7.49097	7.76889	7.05073	6.03023	7.01764	7.99625	7.91511	7.80937	7.70681	6.20955	5.9566	6.81083	8.35654	7.5803	6.43641	7.68142	8.19699	6.92842
	CLM75_RS05005	5.58872	5.2134	5.58751	5.14001	5.55925	5.01073	4.80197	5.47341	5.28583	5.09816	5.69676	5.49439	4.72421	5.36162	5.41627	5.52317	5.75851	4.98854	4.82207	5.4383	CLM75_RS05005	6.60103	7.27745	7.36909	7.32588	7.11756	6.53665	6.77966	7.64456	7.68496	7.39646	7.52714	6.76758	6.73128	6.62966	7.85925	7.13214	6.68744	7.39528	7.67734	6.98354
	CLM75_RS05010	2.53012	2.73972	2.8201	2.80396	2.32836	2.76824	2.68544	2.45345	2.66731	2.576	2.45922	2.62858	2.57094	2.98588	1.98704	2.63193	2.56025	2.92484	2.25055	2.61809	CLM75_RS05010	5.58218	6.80814	6.57461	6.62249	6.18934	5.50764	5.97551	7.09781	7.04625	6.85435	6.89369	5.56473	5.69288	5.60397	7.17005	6.4867	5.59939	6.64502	6.9825	6.0526
	CLM75_RS05015	2.85682	2.72048	2.86012	2.34732	2.50227	3.247	2.49792	3.47019	2.95751	2.67104	3.03866	2.35292	2.31303	3.19766	2.49466	2.58979	2.75099	2.95723	2.92278	2.79782	CLM75_RS05015	5.68293	6.51716	6.37236	6.26299	6.00377	5.45121	5.60925	6.81678	6.95329	6.57452	6.47344	5.33162	5.74306	5.38414	6.93777	6.16372	5.61197	6.45308	6.86614	5.72042
	CLM75_RS05020	2.99856	2.67323	3.30399	2.81245	2.67019	3.21265	2.71588	3.09113	2.83181	2.72348	2.56608	2.73767	2.59362	3.23528	2.8027	2.54087	2.31251	2.84747	2.6017	2.6468	CLM75_RS05020	5.49876	6.53432	6.22991	6.49663	5.99771	5.37264	5.56193	6.89616	6.93296	6.45563	6.67502	5.4742	5.47924	5.38811	6.93777	6.11629	5.75359	6.53691	6.82486	5.7622
	CLM75_RS05030	3.93845	4.14319	4.13404	3.91434	3.73062	3.83093	4.057	3.93214	4.01619	3.72594	3.90324	4.28083	3.80151	4.17182	3.87536	4.2979	4.02593	4.19647	3.60559	4.23276	CLM75_RS05030	5.4495	6.05045	5.87878	5.68303	5.72166	5.39328	5.069	6.44027	6.50275	6.00262	6.06796	5.5551	5.56233	5.19291	6.31765	5.39673	5.75075	6.00744	5.95956	5.5683
	CLM75_RS05035	3.59258	3.90321	3.91088	3.97228	3.36981	4.4347	3.75372	4.42216	3.97674	4.11857	3.39127	3.97824	4.00129	4.61285	3.39324	3.71777	3.58328	4.05849	4.10571	3.7196	CLM75_RS05035	7.5221	9.56666	9.21338	9.07856	8.51182	7.48591	8.35308	9.69334	9.66366	9.16794	9.24017	8.12658	7.99984	8.23389	9.96106	8.85846	8.03336	9.20474	9.6382	8.45738
	CLM75_RS05040	5.08863	5.70981	5.7048	5.93379	5.20716	6.19936	6.16791	5.90874	6.00859	6.0778	5.15948	5.84202	6.10681	5.83124	5.41975	5.76364	5.30511	6.02395	5.97294	5.65166	CLM75_RS05040	4.20039	5.04496	4.66025	4.95533	4.71586	4.03199	5.05743	4.566	4.55036	4.40576	4.36812	4.5651	4.21485	4.26454	5.1667	4.91733	4.17451	4.64885	4.96985	4.98052
	CLM75_RS05045	5.20044	6.07201	5.77713	6.11619	5.05036	5.8591	6.35986	5.88602	6.32605	6.06431	5.31058	6.27457	6.27816	5.9744	5.38312	6.20161	5.22212	6.26196	5.59275	6.21071	CLM75_RS05045	4.97725	5.1984	5.21493	5.35886	4.97066	5.22192	5.09186	5.11451	5.13771	4.9148	5.18981	4.97308	5.23617	4.68642	5.30215	5.23065	4.92234	5.00767	5.05254	4.96719
	CLM75_RS05050	9.98487	10.0507	9.94473	9.58575	10.0069	8.00102	9.88066	9.71865	10.0944	9.85435	10.4359	10.4358	9.38409	9.56694	9.90929	9.93913	10.2487	9.34004	7.76118	10.6191	CLM75_RS05050	12.8766	11.4242	12.5755	12.5285	12.3895	12.9918	11.9333	12.6924	12.6449	12.389	12.6909	12.1904	12.7162	12.7893	11.577	12.3879	12.7108	12.2914	12.0088	12.204
	CLM75_RS05055	6.36094	6.24558	6.30213	6.13407	6.25046	6.55793	6.39758	6.44801	6.15904	6.31343	5.90063	6.54338	6.15016	6.48645	6.07616	6.50843	6.49471	6.16338	6.68485	6.28657	CLM75_RS05055	4.99808	5.20264	4.90162	5.19951	4.94884	4.81559	5.26277	4.91845	5.19878	5.0237	5.29865	5.15529	4.56407	5.09418	4.92906	5.18689	5.05038	4.96358	5.28442	4.77141
	CLM75_RS05060	4.4922	5.14865	4.8186	4.8037	4.73285	4.81851	4.90655	4.77833	4.86773	4.85346	4.46529	4.84135	5.06168	4.9558	4.75252	4.83411	5.05128	4.82003	5.05441	4.6465	CLM75_RS05060	3.18229	3.94056	3.65792	3.57313	3.50499	3.28825	3.89421	3.72059	3.75979	3.7768	3.47174	3.54376	3.99319	3.70457	4.01975	3.88305	3.31228	3.58275	3.73474	3.57497
	CLM75_RS05065	4.79678	5.32206	5.18707	5.08417	4.95859	4.90389	5.19988	5.32156	5.08007	4.96111	4.8924	5.24665	5.07249	5.24426	4.86305	5.28894	5.018	5.24352	5.20601	4.87604	CLM75_RS05065	4.05883	4.59596	4.38383	4.66265	4.41986	3.83717	4.50952	4.31465	4.3248	4.46168	4.29828	4.42712	4.06509	3.9715	4.01074	4.46003	3.96974	4.44655	4.52125	4.74039
	CLM75_RS05070	7.14543	7.22875	7.27331	7.26847	7.15414	7.58791	7.16058	7.58739	7.23305	7.30315	6.95849	7.05679	7.4644	7.40244	7.1886	7.02883	7.26319	7.21778	7.61647	6.9039	CLM75_RS05070	6.12308	6.9748	6.42595	6.61105	6.53673	6.02719	6.73361	6.30801	6.32968	6.49557	6.35329	6.34982	6.54897	6.51257	6.94251	6.56771	6.31658	6.67367	6.63558	6.97579
	CLM75_RS05075	5.75777	6.13658	6.35386	6.59787	5.25233	6.67391	6.30118	6.34321	6.46473	6.55282	5.54887	6.05047	6.41018	6.19771	5.673	6.0142	5.87175	6.26842	6.22525	6.15083	CLM75_RS05075	5.05511	5.9664	5.48171	5.16259	5.4054	4.9254	5.21151	5.30905	5.03631	5.35428	5.09499	5.19303	5.28967	5.04469	5.3205	5.19354	5.00338	5.33921	5.21933	5.69098
	CLM75_RS05080	5.57705	5.4711	5.3423	6.42814	5.81792	5.87621	5.73973	6.07688	5.44762	6.12973	4.7753	5.38484	5.54639	7.05615	5.45954	5.67699	6.10053	5.21836	6.36951	4.9424	CLM75_RS05080	4.32723	3.99185	4.13506	3.8961	4.75231	4.07586	4.20064	4.0501	3.84544	4.18904	3.93867	4.14482	3.95585	4.17843	3.81753	4.15094	3.92505	4.28644	3.98432	4.50232
	CLM75_RS05085	4.20645	4.35763	4.34383	4.49661	4.36094	4.5534	4.01038	4.74045	4.52311	4.22648	3.74327	4.04647	4.24995	5.02098	4.18952	4.1057	4.34916	4.10114	4.60304	3.92109	CLM75_RS05085	3.02369	3.22014	3.23852	3.23151	3.35664	3.11556	2.79219	3.16328	3.13209	2.61309	3.07078	3.21384	2.84342	2.85568	2.97008	3.28713	3.58546	3.35866	3.20875	4.01588
	CLM75_RS05090	4.63894	4.34261	4.03844	4.98163	4.57756	4.71308	4.37171	4.91386	4.26376	4.54734	3.89546	4.66907	4.45787	5.40423	4.03463	4.59277	4.5088	4.37968	4.693	4.39895	CLM75_RS05090	3.62884	3.30144	3.77095	3.41241	3.66649	3.81851	3.60738	3.63484	3.81614	3.46542	3.90017	3.83046	2.75923	3.3821	3.27115	3.49999	3.8313	3.29414	3.62228	3.71451
	CLM75_RS05095	5.42352	4.90541	5.10061	5.96647	5.28272	5.28738	5.15217	5.86856	4.87034	5.63882	4.72017	5.38484	5.1472	6.3235	5.19353	5.24295	5.59395	5.10802	5.36894	5.17407	CLM75_RS05095	4.84406	4.12672	4.47564	4.91509	4.45124	4.90232	4.88327	4.95805	4.7308	5.07522	4.83244	4.8412	4.63666	4.82578	4.54801	4.95173	4.95481	4.38593	4.87032	4.89861
	CLM75_RS05100	6.147	6.32639	6.30998	6.20345	5.9878	6.06955	6.26744	6.45083	6.1726	6.1129	6.14719	6.48311	6.00546	6.2557	6.16474	6.4195	6.22504	6.12148	6.00161	6.62746	CLM75_RS05100	5.10997	5.09338	5.35015	5.43197	5.07074	5.45121	5.1597	5.36224	5.41424	5.22529	5.32432	5.14065	5.34126	5.3342	5.1748	5.44025	5.36113	5.27468	5.45586	4.98273
	CLM75_RS05105	5.72263	5.80832	5.61992	5.73726	5.38959	5.70573	5.63835	6.09381	5.7506	5.26075	5.56981	6.14546	5.66266	5.92632	5.49298	5.67825	6.10947	5.503	5.4953	6.09515	CLM75_RS05105	4.84981	4.96094	5.47299	4.43889	4.9457	5.30973	4.40614	5.3301	5.26679	4.71275	5.20041	5.41002	4.97202	5.14517	4.97149	4.56063	4.9299	4.99276	4.41899	5.07471
	CLM75_RS05110	6.15935	7.0919	6.64673	6.44324	6.25258	6.68867	6.99266	6.54175	6.90424	6.53826	6.16673	6.37629	7.11193	6.16437	6.57426	6.20379	6.30504	7.01504	6.32935	6.89015	CLM75_RS05110	6.94375	7.0735	7.35102	6.93806	6.82551	7.23397	6.61335	6.96169	6.95643	7.02998	7.04179	7.17796	7.29558	6.92146	6.93658	6.95605	6.85827	6.87341	6.60768	6.57989
	CLM75_RS05115	7.51076	7.38095	7.52486	6.63989	7.55783	6.6494	6.99466	7.15427	7.09805	6.80852	7.36668	6.79039	7.02875	6.70055	7.23381	6.96536	7.15037	7.18704	6.76096	7.00356	CLM75_RS05115	5.94207	6.10582	5.85699	5.82327	5.86003	5.95427	5.85205	5.85026	5.87563	6.00483	5.93938	6.11815	5.96131	5.8884	5.83628	5.77726	6.20055	5.99361	5.94534	5.61036
	CLM75_RS05120	4.84067	5.02942	4.91358	4.21239	4.59937	3.86451	4.79689	4.59006	4.66602	4.15933	4.77954	4.38752	5.09782	4.22266	4.36739	4.51046	4.45879	4.99557	4.26557	4.42571	CLM75_RS05120	4.45704	4.33416	4.08388	3.86662	4.53103	4.52176	3.93588	4.14686	4.13373	4.38889	4.37749	4.65542	4.53904	4.28174	4.6327	4.09836	4.50652	4.09041	4.15273	4.34282
	CLM75_RS05125	3.06691	4.23825	4.06722	3.66779	3.58352	3.28388	3.91049	3.66075	3.7055	3.39516	3.66528	3.36154	4.40757	3.23528	3.49446	3.78701	3.06022	4.16354	3.6293	3.65605	CLM75_RS05125	4.12662	3.59476	3.29001	3.11933	3.98712	3.64403	2.37414	3.03242	3.13842	4.23129	3.72033	4.40279	3.75313	3.34441	2.98856	2.98036	3.44482	3.33522	2.85037	3.66581
	CLM75_RS05130	3.14125	3.68037	3.92981	3.49409	3.79018	3.56013	3.33881	3.53537	3.47092	3.52722	3.30867	3.71408	3.23648	3.64247	3.37613	3.90554	2.9083	3.80808	3.70099	3.71689	CLM75_RS05130	3.25333	2.97878	3.40456	2.9563	3.39864	3.2574	2.28767	2.81076	3.16035	3.94779	3.144	3.46367	3.46498	2.86332	1.96198	2.69393	3.01345	3.25899	2.87603	2.46657
	CLM75_RS05135	4.37384	3.19209	3.17771	2.80821	4.28016	2.93347	3.08257	2.97063	3.18437	2.85465	4.7806	2.84607	3.00233	2.61923	4.10553	3.10182	3.99819	3.28523	3.12398	3.90929	CLM75_RS05135	4.92245	3.76986	3.89253	3.2121	4.22355	4.68002	3.56716	4.18843	4.43557	4.64617	4.5176	4.0849	4.4207	4.43559	2.51459	3.37035	4.50652	4.1964	3.43522	3.77698
	CLM75_RS05140	0.986729	1.95725	1.42849	1.26985	1.37215	1.50372	1.77156	1.15944	1.61296	1.15712	2.07403	0.857906	1.65504	1.38331	1.33315	1.40727	1.09545	1.95878	1.0251	2.18111	CLM75_RS05140	2.60865	2.08417	1.83178	1.80536	2.42462	2.58588	1.11658	2.09806	2.38976	2.42733	2.55546	2.28394	1.72772	2.14896	1.62658	1.92481	2.69644	1.99164	1.66133	1.78481
	CLM75_RS05145	4.04638	4.17746	4.0297	3.89049	3.97861	3.9895	4.15549	3.98235	4.12628	3.82259	4.32016	4.09121	3.99279	3.97457	4.34559	4.38055	3.75884	3.81517	3.66702	4.35438	CLM75_RS05145	4.33339	3.75674	4.17081	3.54239	4.10172	4.55596	3.4875	4.44794	4.27109	3.95239	4.27088	4.11517	4.35051	4.28742	3.34473	3.80607	4.55621	3.94537	3.62444	3.74087
	CLM75_RS05150	2.19699	2.84297	2.58559	1.96895	2.29585	2.21584	2.24704	1.48684	2.16161	2.30105	2.30905	1.34542	2.5479	2.25411	2.24119	2.32668	1.79684	2.47498	2.06303	2.45881	CLM75_RS05150	3.4476	2.68532	2.84003	2.70745	2.86495	3.19728	2.44688	3.03242	2.82198	3.23567	3.144	2.90283	2.75923	3.17686	2.20261	2.30377	2.73147	2.70643	2.51925	2.64464
	CLM75_RS05155	3.57256	3.91002	3.85585	3.66545	3.4968	3.43458	3.7579	3.71489	3.72439	3.37709	3.55345	3.99403	3.52698	3.66562	3.31761	3.9541	3.49424	3.61455	3.23634	3.639	CLM75_RS05155	3.31274	3.18873	3.20059	3.16848	3.44836	3.18276	3.16526	3.43129	3.45467	3.1013	3.52753	3.13477	2.88375	3.62597	2.8937	3.12033	3.82591	3.28718	3.37993	2.65577
	CLM75_RS05160	4.7648	5.32334	5.0012	4.80901	4.7099	4.90173	4.87895	4.82831	5.06817	4.64044	4.99525	5.14986	4.86134	4.9726	5.01167	5.05828	4.99713	5.04312	4.66028	5.03437	CLM75_RS05160	4.37778	4.11005	4.42554	4.24631	4.50776	4.8366	4.3947	4.49736	4.26098	4.35456	4.37749	4.21289	4.91479	4.50312	3.61832	4.5118	4.49638	4.34963	3.98432	4.15174
	CLM75_RS05165	4.31683	4.69875	4.28624	4.06218	3.80758	3.88647	4.17441	4.21232	4.43763	4.20615	3.81931	5.01394	3.7819	4.0886	3.90746	4.58207	4.13024	4.41041	3.83959	4.7507	CLM75_RS05165	3.96142	3.63834	3.87095	3.6815	3.29374	4.39996	3.13806	3.92195	3.8102	3.74003	3.71664	3.67148	3.43815	3.67451	2.95136	3.68755	3.87372	3.41084	3.6941	2.58769
	CLM75_RS05170	5.1719	5.44672	5.14718	5.19377	5.16166	5.41903	5.37158	5.30504	5.3759	5.22836	5.1191	5.25454	5.17629	5.153	5.07928	5.33988	5.26421	5.59438	5.36011	5.36242	CLM75_RS05170	4.26627	4.08665	4.11276	4.14354	3.96555	4.08955	4.07719	4.05432	4.06064	4.2237	4.00367	3.91031	3.97464	4.07375	3.59439	3.94391	4.05977	3.83988	3.99607	4.09566
	CLM75_RS05175	5.02991	5.55821	5.31736	5.37151	4.97537	5.27245	5.43309	5.43787	5.40096	5.5669	4.71021	5.66589	5.26137	5.29859	4.979	5.41571	4.88232	5.4997	5.24778	5.89487	CLM75_RS05175	5.12899	4.92033	4.84126	5.11219	4.86312	5.0881	4.84845	4.95127	5.038	4.85464	5.10772	4.95017	4.81406	4.85288	4.78847	5.00898	5.14	4.96686	5.08434	4.65704
	CLM75_RS05180	2.98852	3.60264	3.2894	3.59343	3.13273	3.78256	3.82728	3.39414	3.82746	3.51405	2.92469	3.92321	3.58472	3.66102	2.96021	3.4498	3.3091	3.79201	3.80096	3.26967	CLM75_RS05180	2.77481	2.84571	2.81011	3.11097	2.75429	2.74257	2.81298	2.99776	2.59694	2.47925	2.54718	2.34907	2.24368	2.75258	2.40879	2.82153	2.33582	2.98983	2.75086	2.12615
	CLM75_RS05185	4.43977	4.55301	4.77565	4.68166	4.46145	4.42723	4.94837	4.64851	4.90387	4.75823	4.95086	4.7401	4.6913	4.55822	4.5815	4.50764	4.40568	4.662	4.20965	4.80648	CLM75_RS05185	5.30441	5.20204	4.90634	5.12262	5.48445	4.70944	5.13927	5.06655	5.14244	5.71794	5.39063	5.19834	5.19671	4.94748	4.28941	5.25275	4.7423	5.18482	5.04771	5.55202
	CLM75_RS05190	4.9154	4.87702	5.09223	5.08942	5.16616	4.78031	4.8171	4.93415	4.71988	4.98934	5.31204	5.05216	4.8629	5.00201	5.2073	5.07937	5.03089	4.80587	4.98373	5.12185	CLM75_RS05190	5.07853	4.81589	4.77956	4.58935	5.13702	4.85961	4.53685	4.66412	4.93997	4.94742	4.94388	5.14065	4.93412	4.96533	4.4245	4.56519	5.02707	4.78605	4.4836	4.77651
	CLM75_RS05195	5.52072	6.07769	5.81071	5.84146	5.7002	5.91999	6.07868	5.9338	6.06782	5.8722	5.63848	5.53921	5.80872	5.88451	5.60795	5.61663	5.37418	5.8666	6.14526	5.5633	CLM75_RS05195	5.07363	5.31263	4.94471	4.96231	5.12873	4.79664	5.20234	4.80526	4.89956	4.83982	4.90714	4.94807	4.84503	4.84904	5.30584	4.98278	4.74801	5.09697	5.11082	5.13757
	CLM75_RS05200	5.18843	5.5231	5.31377	5.39642	5.36532	5.42579	5.67423	5.06988	5.66254	5.65241	5.25917	4.9667	5.44508	5.139	5.02819	5.30612	4.77404	5.49364	5.56074	5.16019	CLM75_RS05200	5.20376	5.25431	4.60904	4.90667	5.21744	4.56298	5.23737	4.696	4.71924	5.35775	4.84938	4.9936	4.61287	4.96178	4.35498	4.77384	4.4017	5.08598	4.53742	5.19016
	CLM75_RS05205	7.64418	8.25369	7.67147	7.69268	7.65274	5.85075	8.31789	7.23551	8.358	7.45517	8.02901	7.57936	7.18872	6.8085	8.07028	7.69949	7.37239	7.47497	5.45854	8.42611	CLM75_RS05205	10.1129	8.97705	9.31535	8.8364	9.65227	9.97435	8.9349	9.53362	9.59971	9.48061	9.78383	9.45352	9.28535	9.86605	7.2754	8.93492	9.61294	9.63743	7.93423	9.59476
	CLM75_RS05210	3.49317	6.60291	4.41273	5.47401	4.02645	4.43917	6.98263	4.399	7.25833	6.05041	4.35464	5.64303	6.45059	4.43697	4.04188	4.17681	3.60413	6.32567	4.02978	5.83375	CLM75_RS05210	8.81235	7.51488	7.67323	7.29093	8.7591	8.02586	7.55421	7.86169	7.77262	8.47305	8.11037	7.90137	7.6308	8.02899	5.2302	7.16691	7.53673	8.15561	5.72505	8.78798
	CLM75_RS05215	2.60428	5.28652	2.84025	3.69098	2.25416	2.72502	5.07121	2.66886	5.50673	4.18137	2.85413	4.13175	4.94896	2.81002	2.1569	2.67791	2.31813	4.77532	2.34667	3.92344	CLM75_RS05215	6.85303	5.87677	5.55645	5.05997	6.92983	5.80704	5.57619	5.60848	5.59247	6.49715	6.09236	6.15231	5.80211	5.87713	3.401	5.06888	5.57066	6.19256	3.60484	6.88653
	CLM75_RS05220	3.49671	5.03254	4.24401	3.93973	3.40834	3.27724	4.89234	3.72113	5.1639	3.93927	3.81931	4.24959	4.81063	3.67249	3.71228	4.21889	3.33981	4.58014	3.34416	4.68023	CLM75_RS05220	5.50696	4.72871	4.58863	3.94394	5.75438	4.8687	4.60001	4.60778	4.54442	5.19844	4.97971	4.79987	4.70577	4.695	3.59439	4.06973	4.7163	4.97987	3.63307	5.81897
	CLM75_RS05225	6.76162	6.4727	6.99602	7.20464	6.6926	6.57223	6.41756	6.91096	6.52255	7.11081	6.71785	6.85581	6.11467	6.67909	6.56925	6.91292	6.51595	6.29147	6.19924	7.02696	CLM75_RS05225	5.88659	5.37782	5.48724	5.61744	5.68348	5.79456	5.74254	5.7016	5.69424	5.74338	5.60926	5.43424	5.13957	5.85145	5.32778	5.56744	5.77892	5.58965	5.69859	5.40813
	CLM75_RS05230	7.54561	7.33393	7.34469	6.90703	7.42534	6.55588	7.3612	6.90069	7.37765	7.04122	7.6918	7.07918	7.13434	6.72142	7.18492	7.32234	7.2931	7.53279	6.22913	7.77867	CLM75_RS05230	6.73039	6.33551	6.47046	6.5106	6.38018	6.94207	6.53991	6.46928	6.47926	6.78706	6.49674	6.4549	6.64887	6.57725	6.20362	6.57988	6.74285	6.45346	6.48858	6.44612
	CLM75_RS05235	7.88465	8.51154	8.35985	7.45309	7.82352	7.80438	8.43069	8.10317	8.26049	7.34058	7.85413	8.63491	8.50293	7.84469	7.88116	8.5617	8.00341	8.73168	7.33055	8.8208	CLM75_RS05235	6.09796	6.83706	6.65815	6.6577	6.87387	6.30282	6.76596	6.65266	6.69586	6.57676	6.71623	6.69177	6.7855	6.7338	7.08565	6.82941	6.63213	6.97953	6.96915	6.83302
	CLM75_RS05240	5.12687	5.15512	4.68571	4.61168	5.38477	5.66819	5.26457	5.13674	5.08458	4.54976	4.33607	5.0894	4.92978	5.2163	5.59075	5.41345	5.29304	5.19953	5.52642	4.84788	CLM75_RS05240	4.59506	5.16713	4.77311	4.55895	4.75231	4.49556	4.77266	4.87535	4.7731	4.9428	4.60996	4.85696	4.79304	4.69072	4.48432	4.57767	4.50989	4.77116	4.69503	4.62909
	CLM75_RS05245	5.37042	5.65106	5.2182	5.58154	5.22885	5.57728	5.58985	5.24786	5.50757	5.34592	5.269	5.65599	5.7544	5.52435	5.03728	5.26403	4.96346	5.7397	5.42252	6.00432	CLM75_RS05245	6.34868	6.87682	6.43005	6.32752	6.79176	6.19121	6.36444	6.64731	6.50336	6.87811	6.76123	6.64261	6.6692	6.39109	6.49939	6.33356	6.28745	6.4743	6.30004	6.82934
	CLM75_RS05250	5.7459	6.84711	5.80816	5.8523	5.51404	5.7217	6.40994	5.71371	6.43174	5.36805	4.26533	6.06326	6.3454	6.80173	5.76731	5.94066	5.53665	6.27775	6.0849	4.95737	CLM75_RS05250	3.92652	4.66605	4.66165	4.65261	4.23905	4.37463	4.44217	4.60873	4.5468	4.12121	4.28091	4.13007	4.56407	4.19365	4.99453	4.57767	4.63848	4.27769	4.64687	3.61542
	CLM75_RS05255	6.39125	7.43477	6.48603	5.7779	6.01052	5.63614	7.73382	6.00584	6.6973	5.74057	4.76252	7.27417	6.78905	7.10418	6.41135	7.89992	6.33584	7.19419	6.41243	6.0307	CLM75_RS05255	3.30858	5.41587	5.01415	4.99674	4.51839	4.3456	4.76912	4.88091	4.7953	4.45197	4.61789	3.94021	3.56756	4.61134	6.08626	5.18318	4.47931	4.58073	5.35845	3.59244
	CLM75_RS05260	3.48248	4.37987	4.15027	3.9436	3.6135	4.27571	4.60921	4.08508	4.28252	4.10106	2.89376	4.55871	4.53018	4.13911	3.54124	4.55905	3.64271	4.78347	4.33572	4.26646	CLM75_RS05260	3.40143	3.86921	3.49822	3.56703	3.50499	3.65984	3.69211	3.4485	3.46226	3.35163	3.30983	3.49279	4.16663	3.66144	3.69909	3.40896	3.20838	3.74144	3.68376	2.91847
	CLM75_RS05265	11.7461	12.3212	11.8238	11.2445	11.5717	10.101	12.2024	11.6699	12.0535	11.809	11.6438	12.5411	11.6625	11.6095	11.7184	12.1595	12.1082	11.9811	9.62188	12.8028	CLM75_RS05265	13.4235	12.3119	13.4069	13.6623	12.5735	13.7204	13.2825	13.4746	13.3143	13.2008	13.1926	13.3677	13.7348	13.41	13.3449	13.7304	13.4352	12.921	13.4325	12.6274
	CLM75_RS05270	4.45806	4.61475	4.66703	4.00596	4.67872	4.35975	4.75771	4.30661	4.77319	4.42425	4.52581	4.88605	4.6065	4.62471	4.45145	4.65284	4.36417	4.96723	4.18586	4.85158	CLM75_RS05270	5.48406	5.34641	5.19674	4.74055	5.57065	4.98623	5.08475	4.76289	4.95797	5.68792	5.10631	5.75578	5.03604	4.97769	4.55423	5.05109	4.9071	4.74472	4.36306	5.14351
	CLM75_RS05275	6.53822	6.65856	6.86159	7.16564	6.52918	6.68742	6.70946	7.03101	6.69103	7.04423	6.47041	7.06803	6.60133	6.81525	6.38558	6.93281	6.26268	6.82542	6.59512	6.94696	CLM75_RS05275	6.02371	5.9774	5.91143	5.87785	5.84745	5.95213	5.56704	5.73618	5.87941	5.97236	5.99829	5.75699	5.635	5.80662	5.32778	5.83085	5.907	5.70451	5.80975	5.51737
	CLM75_RS05280	4.77651	4.84095	4.89283	4.90734	4.89219	4.80473	4.73665	5.01508	4.75846	5.20601	5.12494	4.9012	4.82027	4.79711	5.21213	4.93958	5.35927	4.67374	4.72911	4.95852	CLM75_RS05280	5.28865	4.74872	4.96408	4.76473	5.1162	5.44894	4.47298	5.20781	4.92998	5.22149	5.00714	4.41196	5.31938	5.30226	4.66752	4.6493	5.10259	4.65562	4.71243	4.67081
	CLM75_RS05285	2.45923	2.17643	2.43473	4.45251	2.893	4.31187	2.28235	3.28888	2.59966	4.93787	2.41088	2.93384	2.10779	3.19129	2.94869	3.182	2.66098	2.6595	4.64291	2.57093	CLM75_RS05285	3.3044	3.60761	3.10114	3.495	3.91178	2.06694	3.25408	2.80074	2.94621	3.2432	2.86628	2.55081	2.75923	3.63937	1.92408	3.24791	1.62468	3.01534	2.22622	3.67678
	CLM75_RS05290	1.77482	1.37368	1.7315	3.84779	1.54807	3.87992	1.71238	2.17309	1.88507	4.49467	1.93661	1.89558	1.16308	2.37703	2.03868	2.24758	1.48336	1.70021	4.17985	1.24062	CLM75_RS05290	3.0186	3.4817	2.95386	3.25824	3.53459	2.23819	3.0991	2.90729	2.7244	2.9804	2.61214	2.20169	2.1141	3.13963	2.68291	2.8959	2.4663	2.65868	2.60066	3.37408
	CLM75_RS05295	3.29979	3.22796	3.61981	3.64184	4.23157	4.21799	3.41767	3.94018	2.72618	4.34651	3.45887	3.50071	3.24128	3.4638	4.3645	4.10757	4.6514	3.4604	4.94528	3.27335	CLM75_RS05295	2.69412	3.45351	3.06782	3.11933	3.24341	1.95178	3.12149	3.10206	3.0028	2.96227	2.69694	3.0667	2.1141	3.06215	2.63679	2.7269	2.69644	3.14423	2.59625	3.36733
	CLM75_RS05300	4.72456	3.72932	4.55363	6.03332	5.54202	6.12371	3.95858	4.85267	3.56099	6.25624	5.06372	4.41359	4.10227	5.191	5.72965	5.01117	5.41343	3.86723	6.86606	4.03191	CLM75_RS05300	4.18457	4.5377	4.31626	4.44887	4.73966	3.82554	4.28985	4.19864	4.36177	4.60587	4.3468	4.23718	3.23495	4.23837	3.99254	4.4038	4.22863	4.34293	4.15573	4.71136
	CLM75_RS05305	3.03801	2.16509	2.80651	4.22515	3.37371	3.94205	2.17373	3.55296	1.73263	4.19174	3.42412	3.09484	1.72518	3.6118	3.79398	3.14974	3.13217	1.69253	4.89358	2.18111	CLM75_RS05305	2.49599	2.55496	2.56941	2.32218	2.61081	2.07482	2.29754	2.08711	2.14147	2.76723	1.94844	2.11447	1.89488	2.43166	2.40879	2.65592	1.67353	2.31968	2.132	2.36178
	CLM75_RS05310	2.90029	2.40572	2.95557	4.09732	3.36981	3.81269	2.66329	3.54243	2.10062	3.97816	3.07013	2.84607	2.36668	3.60942	3.59644	3.3866	3.3006	2.87146	4.45332	2.69709	CLM75_RS05310	3.2138	3.0342	2.63345	2.77777	2.81758	2.36577	2.42003	2.33862	2.98184	3.35163	2.79112	2.97063	1.89488	2.79311	3.09473	2.59471	2.85307	3.01954	2.66935	2.9092
	CLM75_RS05315	3.89345	4.01955	4.32964	4.85901	4.48507	4.89091	4.1697	4.54681	4.0546	4.83835	4.29966	4.38273	3.94949	4.89734	4.45009	4.4877	4.44345	4.39039	5.21387	4.12872	CLM75_RS05315	3.85123	4.1545	3.47934	3.77967	3.9993	3.68838	3.98555	3.64421	3.97307	4.17336	3.89365	4.05397	3.83767	3.75878	4.04646	3.8628	3.79313	3.93427	3.80512	4.03731
	CLM75_RS05320	3.39403	3.45446	3.21933	3.41829	3.69367	4.08186	3.35824	3.67367	3.49143	3.41301	3.33193	3.19115	3.43789	3.9351	3.84667	3.43797	3.555	3.34765	4.22724	2.72966	CLM75_RS05320	2.58818	2.77914	2.47723	2.98402	2.89786	2.01051	3.22335	2.50827	2.71172	2.06914	2.60418	2.78538	1.97171	2.47216	2.7276	2.85919	2.93549	2.78761	2.98784	3.16419
	CLM75_RS05325	5.10729	5.17575	5.16327	5.40696	5.30023	6.01576	5.68031	5.62583	5.4809	5.8163	5.27201	5.20925	5.78017	5.7631	5.45683	5.09452	5.20478	5.42641	6.06873	4.90009	CLM75_RS05325	4.70051	5.41952	4.89569	5.10379	5.0693	4.1449	5.21801	4.70766	4.73915	4.54626	4.72823	4.71346	5.16434	4.67779	5.26852	5.13869	4.28866	4.97879	5.13075	5.20538
	CLM75_RS05330	12.1271	11.8128	12.2191	11.7979	11.9579	12.6489	11.6896	12.4398	11.6151	11.5793	11.2221	11.9538	11.8697	12.209	12.0162	12.3371	12.1109	11.8601	12.4638	12.1415	CLM75_RS05330	11.1695	11.8022	11.4877	11.5312	11.8002	10.8028	11.9013	11.3596	11.2042	11.7133	11.5011	11.8656	11.6671	11.2294	12.2087	11.7423	11.1209	11.7674	11.6288	12.0346
	CLM75_RS05335	5.54831	6.00242	5.79961	5.97263	5.72331	6.36494	6.11911	6.1498	5.84425	5.93994	5.43598	5.53166	6.13091	6.01011	6.03997	5.85153	5.58407	5.91068	6.10935	5.67066	CLM75_RS05335	4.67324	5.64052	4.99322	5.21714	5.00278	4.77139	5.45358	5.04478	5.03716	4.87417	4.77685	5.16074	5.13957	5.19442	5.7332	5.41392	5.05959	5.16407	5.4369	5.37317
	CLM75_RS05340	9.37937	8.55624	9.11753	9.2515	9.47402	9.57842	8.74387	9.57358	8.61399	9.20287	9.47451	8.67673	8.97604	9.50069	9.60305	9.06149	9.40697	8.76733	9.61155	8.37125	CLM75_RS05340	7.69872	8.6144	8.1846	8.45588	8.14956	7.53084	8.54909	8.11344	8.0788	8.04509	8.09447	8.11398	8.01012	7.99941	8.56754	8.53912	7.75918	8.27688	8.46028	8.41525
	CLM75_RS05345	6.29122	6.37025	6.35269	6.88483	6.10384	6.70576	6.32783	6.74752	6.67282	6.74546	6.36863	6.6514	6.56975	6.69774	6.18575	6.58951	6.34653	6.48715	6.30839	6.55092	CLM75_RS05345	4.7958	5.28719	5.0337	5.17065	4.89769	4.81794	5.31835	4.88091	4.77005	4.93353	4.63753	4.80452	5.19671	4.66255	5.56791	5.13486	4.72791	4.95152	5.22362	5.22792
	CLM75_RS05350	4.97124	4.94822	5.01161	5.50313	4.83253	5.42729	5.21671	5.73698	5.40366	5.50167	4.87271	5.12999	5.99698	5.60021	4.99589	5.1225	5.14359	5.6209	5.63216	4.82167	CLM75_RS05350	4.41505	4.89286	4.48039	4.75939	4.32141	4.30763	4.71124	4.39676	4.42914	4.11302	4.30075	4.67841	4.30669	4.72254	5.29845	4.67803	4.08256	4.6824	4.70325	4.59481
	CLM75_RS05355	8.39711	7.87713	8.42634	8.39284	8.40828	8.65542	8.06686	8.75215	8.16093	8.70936	8.52998	8.16186	8.03525	8.50459	8.48065	8.05012	8.24512	8.07709	8.59634	8.28472	CLM75_RS05355	7.92568	8.55654	8.2421	8.43689	8.46702	7.61486	8.57417	8.13121	8.23006	8.42897	8.19812	8.23974	8.18368	8.03639	8.2399	8.42468	7.80922	8.41223	8.39229	8.65985
	CLM75_RS05360	7.20839	7.67459	7.41691	7.59969	7.26272	8.20824	7.89539	7.53921	7.73306	7.69754	7.17235	7.70894	8.07827	7.68518	7.20221	7.54525	7.24246	7.99514	8.41828	7.36259	CLM75_RS05360	5.9163	6.68628	6.3387	6.47441	6.14753	5.88981	6.52844	6.10079	6.14638	6.17879	6.0328	6.38674	6.37955	6.23214	7.14246	6.40151	6.21093	6.38664	6.5669	6.57404
	CLM75_RS05365	8.02564	7.84606	7.98129	7.96834	8.03848	8.47695	7.47588	8.10003	7.85008	7.96611	7.90082	7.67652	7.96271	8.14366	8.1307	7.81545	7.74219	7.93055	8.54991	7.30115	CLM75_RS05365	6.13899	6.64682	6.37577	6.64798	6.37959	6.0717	6.75436	6.18728	6.25083	6.35327	6.17799	6.44077	6.51728	6.38977	7.05529	6.74617	6.37312	6.57314	6.79563	6.46917
	CLM75_RS05370	8.91795	8.86127	8.74208	9.01595	8.90285	9.61197	8.97436	9.0305	9.07574	8.89969	8.89771	8.54383	9.18514	9.18956	8.92659	8.62949	9.02337	9.01852	9.60254	8.28689	CLM75_RS05370	7.55893	8.52437	8.03702	8.00579	8.09154	7.14924	8.28512	7.88696	7.73866	7.93146	7.81618	8.00251	7.87037	7.77549	8.53255	8.15701	7.48251	8.07617	8.07836	8.36148
	CLM75_RS05375	9.26731	8.3487	8.84736	8.58173	9.28647	9.22547	8.15114	8.89004	8.29006	8.46604	9.08939	8.35906	8.53086	8.94366	9.13816	8.59454	8.89887	8.62573	9.52723	8.07638	CLM75_RS05375	6.96672	7.67099	7.39136	7.34003	7.34132	6.777	7.71332	7.21024	7.14226	7.30411	7.0946	7.32037	7.38959	7.17406	7.94396	7.52615	7.3098	7.50118	7.47003	7.4687
	CLM75_RS05380	7.1264	6.3619	6.56786	7.39602	7.09839	7.48515	6.64707	7.13659	6.45976	6.99115	7.11148	6.66872	7.02249	7.38563	6.93655	6.76928	7.20314	6.604	7.63964	6.31771	CLM75_RS05380	5.6129	6.44154	6.13103	6.15536	6.16993	5.52931	6.38367	5.9898	5.9121	5.89921	5.85383	6.10501	5.75398	5.76444	6.60945	6.25061	5.83099	6.03576	6.24871	6.33718
	CLM75_RS05385	7.74056	6.81686	7.48621	7.73248	7.79255	7.70685	6.87328	7.56827	6.73827	7.56022	7.78601	6.97241	6.8122	7.70975	7.81817	7.31609	7.6117	6.51461	7.75614	6.44209	CLM75_RS05385	6.57267	6.97657	6.76598	6.94219	6.79001	6.39977	7.03249	6.76147	6.62129	6.82078	6.86525	6.84131	6.67208	6.6263	7.20899	6.96902	6.6574	6.8396	6.93816	7.18223
	CLM75_RS05390	4.62606	3.73316	4.53727	4.20112	4.60435	4.59933	4.1697	4.26023	3.94115	4.06877	4.48099	3.64774	4.18174	4.35103	4.59758	4.45139	4.25561	4.52935	4.78824	3.68125	CLM75_RS05390	3.98509	4.30854	3.47934	3.89123	3.612	3.75123	3.94532	3.71171	3.82204	4.16942	3.80613	4.25768	3.29599	3.64824	3.67647	3.67915	3.87372	3.92757	4.00938	3.47802
	CLM75_RS05395	6.15767	6.12784	6.02392	6.39674	6.05429	6.73964	6.39825	6.33204	6.08563	6.63706	5.89283	6.2239	6.07895	6.39486	5.78578	6.33354	6.04908	6.12932	6.86294	5.90323	CLM75_RS05395	5.08341	5.9781	5.35534	5.59813	5.38697	4.84123	5.73802	5.25443	5.15263	5.50277	5.16432	5.49017	5.34126	5.1199	5.87901	5.65784	5.08238	5.46717	5.66849	5.89135
	CLM75_RS05400	6.58184	6.08936	6.3919	6.48961	6.53267	6.77273	5.90599	6.39192	6.37239	6.80142	7.18458	6.04896	6.19039	6.43213	6.45646	6.0559	6.58663	6.03347	7.08069	6.19184	CLM75_RS05400	6.11177	6.31635	5.9531	6.08457	6.10659	6.04636	6.26044	6.06287	6.03548	6.08661	6.17262	5.88987	5.84359	6.16114	6.24649	6.21981	6.0618	6.28981	6.11001	6.08588
	CLM75_RS05405	5.78194	5.10925	5.59543	5.47401	5.936	5.79842	4.63561	5.62832	5.13106	5.57445	6.49413	5.05065	4.8551	5.57047	5.76895	5.18928	5.51907	5.13658	5.86159	5.23868	CLM75_RS05405	4.51058	4.80318	4.54539	4.79764	4.77197	4.29419	4.8767	4.29099	4.45218	4.49359	4.52606	4.50063	4.48764	4.42274	4.93384	4.69999	3.78203	4.61171	4.63726	4.51459
	CLM75_RS05410	4.88597	5.20995	5.26863	5.45178	5.24277	6.00376	5.14339	5.37298	5.53746	5.57643	4.98336	4.83083	5.58651	5.58936	5.39873	5.34067	5.02403	5.22635	5.91382	4.45847	CLM75_RS05410	3.56395	4.53194	3.95082	4.05265	3.94365	3.42406	4.29479	3.66277	3.89487	4.13746	3.70552	3.61434	3.17122	3.55704	4.6209	4.32792	3.85267	4.30896	4.27211	4.44576
	CLM75_RS05415	4.60322	5.05422	4.79814	5.50509	4.64363	5.94585	5.69785	5.18267	5.59347	5.68729	4.28334	5.19838	5.88806	5.37713	4.88841	4.99208	4.58303	5.36979	5.96597	4.79498	CLM75_RS05415	4.06625	4.97729	4.302	4.45053	4.17605	3.96357	4.58398	4.05713	4.30945	4.08815	3.80959	3.9612	3.85805	4.21469	4.8146	4.48072	3.98917	4.38756	4.65854	4.38354
	CLM75_RS05420	3.847	4.3811	4.28379	4.28734	3.6102	4.32479	4.44624	4.56253	4.35145	4.46075	3.67213	4.34628	4.30595	4.4794	4.14982	4.31417	3.75055	4.49887	4.83615	4.33863	CLM75_RS05420	3.2918	3.34811	3.46661	3.32117	3.34714	3.39601	3.42586	3.56159	3.25366	3.44598	3.33891	3.18558	2.92297	3.25439	3.71027	3.2954	3.31228	3.35533	3.56258	2.93683
	CLM75_RS05425	4.82947	4.68194	5.08803	5.12901	4.82258	5.46354	5.14419	5.41303	5.1008	5.55288	4.45473	5.13996	5.10705	5.51354	4.34705	5.13446	4.78118	5.10369	5.7511	5.29419	CLM75_RS05425	5.00324	4.63053	4.37193	4.71183	4.72872	4.65657	4.69639	4.63434	4.45851	4.9148	4.38215	4.51489	4.32144	4.56059	4.73475	4.66533	4.36871	4.30552	4.58599	4.42964
	CLM75_RS05430	6.69261	7.15668	7.50053	6.70939	7.01379	7.68759	7.50279	7.43727	6.84438	7.77757	6.56426	8.18234	7.30636	7.68589	7.97468	7.90274	6.97337	7.70597	7.20228	8.38676	CLM75_RS05430	8.50855	8.62515	8.74184	9.12702	9.09706	8.32639	9.13252	8.79136	8.80219	9.16435	9.07609	8.8304	8.67578	8.50566	8.529	9.06944	8.40912	8.69484	8.89151	8.89616
	CLM75_RS05435	4.84207	5.35612	5.3795	4.94352	4.71606	5.03453	5.79883	5.02015	5.29412	5.21112	4.90506	5.76587	5.45646	4.97446	5.12778	5.63358	4.93356	5.78551	4.87882	5.73892	CLM75_RS05435	5.69494	5.16092	5.30528	5.01253	4.74871	5.64769	4.65093	5.4288	5.47987	5.08363	5.17779	5.36821	5.49234	5.56588	4.82493	4.77778	5.56582	4.96686	4.80025	5.05594
	CLM75_RS05440	4.62282	3.38529	4.64429	5.66297	4.82401	4.61652	3.89157	4.61875	3.91735	5.30013	3.64685	4.14878	3.86813	5.1846	4.2934	4.18568	4.6142	3.6186	4.61942	3.45966	CLM75_RS05440	2.97198	3.31493	2.91691	2.9563	2.89786	3.11173	3.02975	2.7565	2.94981	2.90648	2.9814	2.20169	2.52436	3.13333	3.16141	2.94926	2.56021	2.95071	2.97772	2.44108
	CLM75_RS05445	4.35834	4.13885	4.6557	5.03879	4.1338	3.51855	4.2625	4.67125	4.80767	4.98458	3.53853	4.86902	4.68779	5.47409	3.87738	4.20674	4.73885	4.15798	3.69539	4.22897	CLM75_RS05445	3.71	3.21055	3.43755	3.72869	3.06366	4.1449	3.0991	3.87019	3.9959	3.31639	3.93232	3.45778	2.75923	3.48465	4.01074	3.3885	3.955	3.43309	3.88492	2.92768
	CLM75_RS05450	2.77161	3.09981	3.51089	3.51243	2.83762	2.54894	3.30488	3.36655	3.84084	3.41478	2.43256	3.72926	3.53871	3.80976	2.62104	3.22048	2.77979	3.32549	2.70574	2.87751	CLM75_RS05450	3.2138	2.90042	2.9028	2.4991	3.06945	3.02893	2.72065	2.93503	3.01317	2.87775	3.29507	2.84078	2.96116	3.09494	1.92408	2.75115	3.16633	2.82174	2.51925	2.59927
	CLM75_RS05455	2.19699	2.74354	3.0393	2.83344	2.49513	2.06223	2.78726	2.6296	3.7215	2.94576	2.09458	3.10068	3.26972	3.35121	1.74203	2.79844	2.49724	3.20659	2.08892	2.58286	CLM75_RS05455	3.12187	2.62523	2.38553	2.61592	2.29225	3.06104	2.83347	2.83386	3.05725	2.0174	3.14948	2.63679	2.41855	2.67663	2.70543	2.54473	2.38063	2.22084	2.5239	2.63343
	CLM75_RS05460	3.61558	3.83508	3.92352	3.62026	3.7989	3.03528	3.93289	3.70863	4.19145	3.69564	3.70145	4.35364	3.5191	4.05743	3.32357	4.23436	3.32872	4.04198	3.4243	4.44872	CLM75_RS05460	4.1337	4.04274	4.11276	3.66733	3.82547	4.23385	3.2692	3.92349	4.17433	3.94317	4.0974	4.10011	3.13826	4.16922	3.07757	3.65151	4.32351	4.14149	3.71049	3.34
	CLM75_RS05465	0.42723	1.45974	1.75998	1.80856	1.11699	0.854367	1.26001	0.962866	1.77228	1.34736	0.391016	1.73944	1.29807	1.91856	0.357494	1.29374	0.724296	1.2239	1.24058	1.8369	CLM75_RS05465	0.601784	0.956321	0.700231	1.21145	0.740578	0.955971	1.02452	0.877718	0.80974	0.948346	1.09993	0.29473	-0.199446	1.06523	0.34417	-0.184589	1.69735	0.692076	0.798701	0.285654
	CLM75_RS05470	4.19777	4.8648	4.52072	4.53172	4.06795	4.49741	4.62304	4.62042	5.00718	4.57138	4.026	4.7457	4.72078	4.83641	4.10207	4.7517	4.19886	4.85225	4.58648	4.42902	CLM75_RS05470	3.54991	3.76167	4.09839	4.07645	3.87589	3.61188	3.77567	4.06552	3.90418	3.88662	4.11712	3.69171	4.36482	3.66144	4.16494	3.78861	4.02255	3.77915	3.7267	3.88964
	CLM75_RS05475	5.14956	5.7592	5.36913	5.38935	5.15147	5.52012	5.48263	5.57162	5.6872	5.36713	4.93954	5.67767	5.5799	5.58633	4.92317	5.46899	5.2459	5.59335	5.61816	5.28051	CLM75_RS05475	4.31897	4.54631	4.69204	4.60728	4.67278	4.3093	4.60399	4.53813	4.54917	4.54016	4.43921	4.48333	4.6831	4.41756	4.6327	4.60786	4.51325	4.3794	4.56698	4.52979
	CLM75_RS05480	5.48101	5.62025	6.26659	6.37614	5.29921	7.12142	5.50148	5.96371	5.28925	6.35903	5.57165	6.04745	4.8629	5.73054	5.3601	6.24	5.10753	5.11378	6.74748	5.31043	CLM75_RS05480	4.42085	6.15696	5.53831	5.41933	6.65021	4.55596	4.87835	6.07088	6.07106	6.55121	6.31783	4.49489	4.02959	5.53872	5.59832	5.31845	4.5266	5.79809	5.47097	5.84472
	CLM75_RS05485	9.76659	9.32849	9.28393	8.61454	9.89594	9.19774	9.26292	9.7724	9.22154	8.81956	9.13112	9.43419	9.74528	9.82627	10.0396	9.47045	9.73398	9.57049	9.71633	8.99986	CLM75_RS05485	9.4534	8.8512	9.36405	9.56021	9.40193	9.59515	9.35088	9.45545	9.53602	9.42534	9.46804	9.42397	9.67029	9.42514	9.23106	9.47839	9.77087	9.37401	9.38995	9.44439
	CLM75_RS05490	3.50378	3.64407	3.57643	3.29959	3.40453	3.28388	3.77866	3.28888	3.61494	3.52394	3.37176	3.64774	3.7753	3.24146	3.38756	3.72509	3.37259	4.00528	3.2286	3.85126	CLM75_RS05490	3.79877	3.37627	3.43428	3.53616	3.4078	4.0739	3.24391	3.61973	3.73495	4.08397	3.64472	3.40974	3.29599	3.32243	2.97008	3.43912	3.87372	3.52769	3.18548	2.93683
	CLM75_RS05495	3.22484	3.77106	3.29914	3.53054	2.91457	4.38157	4.16341	3.93483	3.86199	3.08364	2.79677	3.97187	3.93477	3.90623	2.94869	4.12058	3.45906	4.05101	4.38705	3.59842	CLM75_RS05495	2.6813	2.90637	3.05512	3.27704	2.81068	2.59138	3.30877	2.9135	2.96413	3.05072	3.0416	2.97063	2.80194	3.4394	3.07757	3.43164	2.30514	2.96823	3.39268	3.23265
	CLM75_RS05500	4.77359	5.3163	5.08662	4.49134	4.79377	5.17588	5.32296	5.03149	5.19654	4.61136	4.60194	5.46522	5.31238	5.1106	4.83203	5.40891	4.86131	5.45674	5.60252	4.96195	CLM75_RS05500	3.85695	4.22883	4.33914	4.4034	4.08181	4.00749	4.35509	4.32168	4.23759	4.21224	4.40754	4.25768	4.13357	4.4458	3.87826	4.23356	3.955	3.92757	4.3183	4.04579
	CLM75_RS05505	5.89235	6.5277	6.43615	5.73893	5.88911	5.59005	6.78089	6.19196	6.28062	6.48166	6.27646	6.85711	6.35317	6.02451	6.04809	6.46356	5.86409	6.45263	5.99136	6.49714	CLM75_RS05505	6.10037	6.3944	6.84126	6.46706	6.14753	6.19347	5.99989	6.66605	6.87706	6.64441	6.69155	5.89206	5.47265	6.93329	5.942	6.26646	6.1025	6.50538	6.28439	6.24259
	CLM75_RS05510	5.54318	6.27192	6.20382	5.55145	5.74454	5.14706	6.46379	5.97615	6.02128	6.03407	5.90548	6.46735	6.04507	5.6677	5.78632	6.27075	5.87414	6.06279	5.52484	6.29929	CLM75_RS05510	6.39605	6.65281	7.08223	6.43394	6.06879	6.34214	5.7587	6.84081	6.99072	6.38083	6.78256	6.36722	6.31466	6.87407	6.07333	6.08683	6.22738	6.59304	6.0669	6.0589
	CLM75_RS05515	2.85129	3.05135	2.8862	2.77387	2.80334	2.81021	3.26719	2.60283	3.12436	3.05665	3.06319	3.23434	3.51119	2.95238	2.57181	3.04837	2.81599	3.46941	2.63722	3.2807	CLM75_RS05515	3.52859	3.29465	3.65231	3.32479	3.45279	3.93354	3.06484	3.56356	3.71391	3.27292	3.78867	3.61434	3.87815	3.90649	3.0602	3.21052	3.93511	3.47045	3.25418	3.24006
	CLM75_RS05520	3.77877	4.15614	3.9077	3.70927	4.01402	3.86451	3.99273	3.93483	4.02677	3.7626	4.14242	4.28083	4.20156	3.77825	3.94661	4.44254	3.55261	4.23528	3.90176	4.05565	CLM75_RS05520	3.56395	3.1466	3.33272	3.10677	3.52198	3.76103	3.05905	3.49066	3.44959	3.54065	3.40914	3.15677	3.41082	3.49451	3.25598	3.17213	3.59817	3.25542	2.90836	3.41394
	CLM75_RS05525	2.71796	3.09084	2.61707	2.85002	2.33637	2.85099	3.1637	2.85057	3.18017	2.80685	2.84608	2.96623	3.0303	3.02221	2.33859	3.00092	2.64318	2.93138	2.94185	3.22085	CLM75_RS05525	2.56743	2.51656	2.22095	2.42688	2.43362	2.4651	2.01611	2.45817	2.36299	1.54359	1.93581	2.08418	1.81372	2.52124	1.71802	2.38348	2.59866	2.60929	2.08248	1.84437
	CLM75_RS05530	2.60428	2.94596	2.65548	1.96895	2.84326	2.55443	3.08591	2.88432	2.66431	2.38665	2.80094	3.14663	2.96803	2.6659	2.8489	3.09053	2.52667	3.1004	3.01568	2.98486	CLM75_RS05530	2.74431	2.00316	2.34437	2.51819	2.64997	2.6922	1.94255	2.18278	2.58309	2.03485	2.47915	2.14413	2.04466	2.6504	2.20261	2.38864	2.4663	2.39286	2.30928	2.36178
	CLM75_RS05535	1.82078	2.60772	2.34356	2.08555	2.13058	2.3672	2.29968	2.26135	2.45054	2.2182	1.67983	2.97262	2.33113	2.52109	1.92566	2.55189	2.0875	2.10471	2.86902	2.27974	CLM75_RS05535	1.50327	1.55763	1.26817	1.62931	1.09862	1.20617	1.20312	1.57849	1.56895	0.7929	1.97338	1.46257	-0.199446	1.84407	1.57859	1.4593	0.675367	1.38258	1.53817	1.84437
	CLM75_RS05540	4.68161	4.95646	4.92306	4.4754	4.39395	4.66179	4.743	4.60532	4.92413	4.70995	4.94238	4.9968	4.72934	4.87168	4.37889	4.99006	4.40039	5.20628	4.72361	4.92609	CLM75_RS05540	4.82233	4.30854	4.30379	4.37577	4.61259	4.71575	4.46424	4.53511	4.57506	4.8021	4.58792	4.5733	5.02706	4.63383	4.01074	4.56291	4.70166	4.29861	4.28448	4.14386
	CLM75_RS05545	6.8972	6.44659	6.73188	6.44801	6.97132	5.56371	6.26303	6.24054	6.53639	6.58211	7.29432	6.6839	5.85794	5.95621	6.6756	6.57	6.8342	6.23083	5.51134	7.39342	CLM75_RS05545	8.08372	6.86579	7.49274	7.12656	7.33892	8.26063	6.90396	7.69974	7.78528	7.35537	7.61668	7.45332	7.55479	8.03428	6.86586	7.06058	7.92248	7.41956	7.16083	6.91806
	CLM75_RS05550	6.72734	6.67114	7.22112	7.24614	6.85027	7.74777	6.61771	7.45586	6.76537	7.21458	6.21601	6.51794	6.80614	7.42958	6.86146	7.05253	6.64509	6.88598	7.71534	6.26775	CLM75_RS05550	5.59506	6.04776	5.66351	5.86983	5.49631	5.22636	6.20974	5.71678	5.72452	5.50747	5.72576	5.89751	6.18755	5.7917	6.26366	5.98318	5.61041	6.27493	6.01464	6.09817
	CLM75_RS05555	5.2869	5.61973	5.5675	5.21792	5.47101	5.34641	5.50273	5.60236	5.46241	5.35748	5.36516	5.67277	5.41462	5.49104	5.29864	5.65481	5.45929	5.55259	5.55068	5.48992	CLM75_RS05555	5.62131	5.22306	5.3133	5.18167	5.22783	5.49887	5.3507	5.41956	5.37793	5.34556	5.22398	5.33323	5.39107	5.37882	5.43947	5.22633	5.63065	5.19973	5.20204	4.87023
	CLM75_RS05560	3.52476	4.47594	4.1822	4.25347	3.3776	4.62438	4.63561	4.05576	4.61086	4.26532	3.89936	4.02511	4.7664	4.06093	3.88949	4.15891	3.56448	4.50217	4.61348	3.91402	CLM75_RS05560	3.71	4.65372	4.07552	3.88634	4.41532	3.76348	4.70939	3.70097	3.80225	4.23884	3.93867	4.17746	4.01151	3.66581	4.28194	4.1418	4.02255	4.12986	4.20573	4.21328
	CLM75_RS05570	6.99159	7.78521	7.47122	7.19169	7.01535	7.05	7.74362	7.59632	7.82488	7.29907	7.22417	7.88358	7.84459	7.38336	7.29215	7.53349	6.91291	7.84021	7.00821	7.88989	CLM75_RS05570	6.15067	6.03151	6.43046	6.8203	6.25558	6.43733	6.60791	6.547	6.55543	6.44507	6.40748	6.37896	6.62528	6.41596	6.3213	6.73557	6.52475	6.28327	6.75694	6.38225
	CLM75_RS05575	5.32827	5.9314	5.59445	5.68912	5.3867	5.91413	5.9196	5.97811	6.01096	5.55046	5.50157	5.89513	6.02575	5.95527	5.60367	5.74216	5.51907	5.74759	5.72657	5.91094	CLM75_RS05575	4.39163	4.4939	4.59156	4.41872	4.67658	4.61392	4.40614	4.35172	4.47985	4.29786	4.29086	4.25088	4.27672	4.60907	4.68463	4.47588	4.42328	4.34461	4.50137	4.30446
	CLM75_RS05580	3.64781	4.0842	3.93606	3.83119	3.51103	3.96906	4.25363	3.94286	3.94239	3.84512	3.8837	3.91659	3.87122	3.82835	3.67547	3.98897	3.37259	3.81694	3.74236	3.96735	CLM75_RS05580	3.85409	3.88738	3.70203	3.8032	3.98099	4.07979	3.69957	3.77618	3.88173	3.81266	3.3437	3.90599	4.09974	4.19062	4.24398	3.98708	4.09606	3.87514	3.90107	3.86588
	CLM75_RS05585	3.6731	3.78224	3.89812	3.55603	3.65574	3.91453	3.82129	3.37844	3.897	3.47889	3.73892	3.90995	3.61089	3.7633	3.74374	3.69559	3.34532	3.81694	3.36903	4.03408	CLM75_RS05585	3.48128	3.41436	3.4473	3.51731	3.4704	3.81381	3.24391	3.50513	3.43425	3.19743	3.72768	3.41583	3.61623	3.24857	3.63014	3.29265	3.49324	3.50986	3.44994	3.28374
	CLM75_RS05590	4.69092	4.49531	4.75103	5.23853	4.7894	4.649	4.63675	4.82252	5.03247	5.33659	5.04361	4.40652	4.61021	4.51298	5.15227	4.85982	5.16635	4.57702	4.37658	4.60174	CLM75_RS05590	3.99549	3.64369	3.75534	3.78756	3.75537	4.39209	3.65805	4.09861	4.04557	3.45249	3.6486	3.02744	3.13826	4.28458	3.359	3.67493	3.79864	3.64942	3.82971	3.65477
	CLM75_RS05600	5.51112	5.95916	5.81071	5.8456	5.4453	6.23959	6.06227	6.20426	5.85715	5.93841	5.2622	5.94473	5.97411	6.14226	5.24783	6.00521	5.31076	6.04783	6.50306	5.74557	CLM75_RS05600	4.41118	4.94657	4.69204	4.83491	4.63033	3.97204	5.04723	4.24986	4.38058	4.68814	4.46582	4.48042	4.48764	4.43046	5.03954	4.86182	4.20391	4.60613	4.79161	4.52676
	CLM75_RS05605	5.10149	5.11442	5.20271	5.17168	5.17289	5.36843	5.18907	5.39851	5.24464	5.29869	5.05064	5.06717	5.03708	5.42133	4.81097	5.33111	4.7903	5.3722	5.63436	4.72535	CLM75_RS05605	3.76574	4.26055	3.75272	3.95332	3.80826	3.46062	3.96403	3.99844	3.78622	3.97517	3.73863	4.01838	4.27672	3.77101	3.91737	4.02569	3.80961	4.16066	4.12701	4.16348
	CLM75_RS05610	4.78233	5.10851	5.01899	5.10763	4.57417	5.56711	5.35025	5.26611	5.19132	5.35148	4.63388	4.88943	5.53862	5.14478	4.85072	5.15537	4.64135	5.22436	5.79828	4.75861	CLM75_RS05610	3.99808	4.40735	4.14907	3.86165	3.98406	4.18915	4.24211	3.98818	4.04051	4.34059	4.21185	4.28123	3.41082	3.90649	4.69028	4.38197	3.86849	4.23671	4.29539	4.27229
	CLM75_RS05615	3.74638	3.81345	4.07291	3.35291	4.03878	3.56559	3.65615	3.61458	3.69816	3.45669	4.04548	4.14878	3.55035	3.67706	3.87738	3.76587	3.48677	3.88249	3.91146	4.12872	CLM75_RS05615	3.61542	3.60943	3.78127	3.3284	3.48347	3.91389	3.21296	3.50923	3.52881	4.01089	3.62911	3.32161	3.66332	3.73402	2.8937	3.42412	3.79313	3.50386	3.01119	3.91763
	CLM75_RS05620	7.24151	7.72807	7.42499	7.67955	7.12755	7.67912	7.72195	7.73765	7.54497	7.82692	7.14347	7.85035	7.52194	7.76734	6.96208	7.66551	7.62678	7.52484	7.60306	7.57675	CLM75_RS05620	7.46315	7.07284	7.65213	8.00014	7.32053	7.79553	7.5524	7.87567	7.80704	7.47688	7.49574	7.38314	7.62635	7.48671	7.45142	7.86848	7.63442	7.21923	7.77981	7.24711
	CLM75_RS05625	6.3384	6.32702	6.527	5.65532	6.31626	6.57629	6.04952	6.04802	5.84824	6.42715	6.74193	6.57102	6.35428	6.15622	6.30239	6.07417	5.9206	5.74388	7.01498	5.75352	CLM75_RS05625	1.75656	2.1102	1.67463	1.68667	1.92174	2.08266	1.41737	1.70563	1.96757	1.8696	2.191	1.85224	2.41855	2.0851	1.36888	1.74334	1.52173	1.85706	1.89441	1.28046
	CLM75_RS05630	5.10032	4.7874	5.03947	3.93973	5.0467	5.14433	3.98739	4.82542	3.96579	4.65025	5.52004	4.8361	4.81867	4.72841	4.89743	4.55631	5.02918	4.057	5.3206	3.87329	CLM75_RS05630	-0.733972	-1.33367	-0.936367	-2.10265	-1.94967	-0.379084	-1.02092	0.170369	-0.841205	-0.160266	-0.593228	0.126596	-1.10772	-0.14876	1.31131	-0.694039	-0.228311	-1.20101	-0.327949	-0.762054
	CLM75_RS05635	5.44936	4.65584	5.32215	3.66779	5.37508	4.8423	4.08726	4.78728	3.75722	4.60826	5.86917	4.86215	4.54189	4.60568	5.12095	4.83185	4.9945	4.22734	5.4377	4.36133	CLM75_RS05635	1.76874	0.299011	0.330397	0.445836	0.852254	1.0708	0.482934	1.04548	1.02994	1.41619	1.16632	0.240833	2.18035	0.739916	1.31131	-0.0389067	1.4948	0.649276	0.199037	-0.542726
	CLM75_RS05640	7.59336	7.3445	7.72461	6.59909	7.39641	7.67613	7.03941	7.26916	6.76729	7.36589	7.63024	7.69548	7.41539	7.07961	7.40503	7.44946	7.22966	7.00616	7.98504	6.99214	CLM75_RS05640	3.16397	2.35184	2.94471	2.2479	3.01649	3.61458	2.15284	2.88217	3.14472	2.65884	3.1385	2.36175	2.75923	3.1459	3.02483	2.08598	2.95538	2.33327	2.50052	1.70137
	CLM75_RS05645	8.52779	8.9247	9.0977	7.88041	8.40006	8.95754	8.56525	8.44924	8.19441	8.71827	8.75508	8.76671	8.59852	8.53956	8.4533	8.7066	8.13202	8.567	9.37276	8.41979	CLM75_RS05645	5.88379	5.03549	5.73624	5.27158	5.16973	6.2137	5.10034	5.69305	5.76853	5.63311	5.64463	5.25212	5.28215	5.8086	5.15448	5.33258	6.04566	5.66745	5.39504	5.0664
	CLM75_RS05650	8.59547	7.65724	8.52417	7.74846	8.56088	8.76314	8.10382	8.18415	7.82547	8.43154	8.87624	7.82496	8.49843	7.75835	8.61164	7.70614	8.18939	7.61489	8.38895	7.67324	CLM75_RS05650	3.35373	2.96744	3.01196	3.20034	3.36137	3.47559	3.28912	3.25663	3.65995	3.26555	3.38145	2.80408	2.52436	2.94473	2.97008	3.03074	3.69006	2.98123	3.1195	3.23265
	CLM75_RS05655	10.8587	9.33657	10.6427	9.87266	10.6038	10.5247	9.61243	11.0011	9.20637	10.6834	11.1499	10.3924	9.90688	10.4834	10.693	10.1328	10.8427	9.08986	10.8454	9.93435	CLM75_RS05655	3.92108	3.49756	3.76577	4.28211	3.75537	4.31097	3.4123	4.41329	4.61532	4.04574	3.9976	3.70172	4.60082	4.10628	3.95544	3.83849	3.95993	3.91181	4.36694	3.45909
	CLM75_RS05665	8.69977	7.43963	8.26179	7.32349	8.62944	7.71439	7.46023	8.1611	7.05263	7.82024	9.31415	7.846	7.36025	7.76881	8.23982	7.99101	8.48618	7.34224	8.20516	7.67062	CLM75_RS05665	4.82815	4.76027	4.87537	4.45384	4.8928	4.97574	4.26994	5.02842	4.98368	4.82234	5.03554	4.92903	5.10588	4.80611	4.57883	4.4378	4.8284	4.84057	4.48836	4.76885
	CLM75_RS05670	8.91207	8.10314	8.59604	8.11487	8.74532	8.4726	8.15789	8.57888	7.90039	8.45903	9.24201	8.38534	7.95343	8.44805	8.61597	8.47845	8.66338	8.25216	8.7969	8.12234	CLM75_RS05670	5.86902	5.62526	5.63179	5.37727	5.59193	5.80408	5.38118	5.66801	5.61534	5.56266	5.56995	5.66406	5.7154	5.42984	5.63397	5.44645	5.87603	5.64788	5.47277	5.56388
	CLM75_RS05675	9.01575	8.14081	8.57014	8.06814	8.88196	8.15969	8.05362	8.48336	7.8422	8.52883	9.32152	8.37377	7.75564	8.27395	8.46144	8.39526	8.65389	8.20245	8.5815	8.06365	CLM75_RS05675	5.97002	5.84264	5.79088	5.99204	5.80557	6.00467	6.01342	5.86235	5.96824	5.99372	5.95434	5.74856	5.90365	5.84761	5.80534	5.96645	5.94977	5.81089	5.89514	5.66231
	CLM75_RS05680	5.6473	4.48736	5.24615	5.43676	6.07838	5.13335	4.62534	5.30088	4.50977	5.18279	5.73925	4.74757	4.68779	5.33587	5.56393	5.14359	5.52698	4.77259	5.2781	4.77821	CLM75_RS05680	3.66185	3.89339	3.7369	3.83653	4.0732	3.95932	4.0886	3.74169	3.69901	3.74534	3.51059	3.75556	3.20344	3.52371	3.14503	3.99218	3.99878	4.14727	4.07573	3.27656
	CLM75_RS05685	5.87883	5.23118	5.8699	6.53485	6.25628	6.23959	5.35992	5.90395	5.49282	6.28051	5.86966	5.38604	5.59683	5.9744	5.90038	5.66879	5.96918	5.48867	6.10248	5.37191	CLM75_RS05685	4.82379	5.41535	4.83632	4.97618	4.86312	4.56158	5.11436	4.78083	4.85223	5.04755	4.82732	4.93328	4.18288	4.83552	5.0217	4.92356	4.72212	4.94711	4.93103	4.90794
	CLM75_RS05690	6.01667	5.74308	5.98523	6.7951	6.26418	6.83307	5.72483	6.21811	5.81574	6.4736	5.85719	5.65897	5.676	6.24767	6.03498	5.90191	6.11473	5.77237	6.56815	5.62593	CLM75_RS05690	5.01351	5.83173	5.11854	5.20247	5.16838	5.00182	5.7966	4.81109	4.95797	4.88624	4.8561	5.23843	4.36482	5.12943	5.46609	5.42338	4.91981	5.29478	5.24558	5.12761
	CLM75_RS05695	7.92549	5.80923	7.38726	8.46751	8.18324	7.97564	6.02324	7.74895	5.97318	7.88586	7.4381	6.82612	5.63559	7.8038	7.71453	6.92541	8.15663	5.82246	7.81273	6.63966	CLM75_RS05695	7.48775	7.28232	7.58599	7.47435	7.3556	7.72668	7.45767	7.65375	7.62383	7.50415	7.45205	7.28959	7.686	7.68846	7.1006	7.39751	7.3951	7.38716	7.32653	7.30567
	CLM75_RS05700	6.54765	4.89943	6.17634	7.25958	6.78407	6.82314	4.8251	6.5338	5.20017	6.75529	6.06453	5.65202	5.00501	6.56274	6.55127	5.48488	6.78254	4.72166	6.7512	5.38646	CLM75_RS05700	5.80691	5.98971	5.87637	6.02243	5.9763	5.82935	6.31003	6.01313	5.97753	5.59685	5.73399	6.01856	5.4858	5.89679	6.02938	6.06039	6.00687	5.84566	5.94837	6.04521
	CLM75_RS05705	5.54831	4.25439	5.31617	5.84663	5.67515	6.10557	4.3826	5.77496	4.5912	5.80214	5.05676	4.9842	4.87991	5.4342	5.38881	4.76123	5.73244	4.20997	6.09079	4.90841	CLM75_RS05705	5.47108	5.79971	5.73359	5.6788	5.67875	5.43599	6.09702	5.40199	5.54325	5.48065	5.43057	5.61723	5.36993	5.72622	5.86907	5.63793	5.69121	5.9111	5.70729	6.02391
	CLM75_RS05710	10.3635	8.84471	10.0748	11.2023	10.526	10.9809	9.26486	10.7996	9.02397	10.9568	9.96833	9.85318	8.93103	10.6903	10.3364	9.7717	10.7152	8.86253	10.5311	9.7028	CLM75_RS05710	9.5481	10.3165	10.0902	10.0561	9.93772	9.73157	10.2565	9.92381	9.88456	9.62652	9.69625	9.923	9.97181	9.95442	9.95945	10.009	9.73248	9.91976	10.0674	10.3303
	CLM75_RS05715	11.0194	10.5123	10.8104	9.43633	11.0467	9.93713	10.812	10.4222	10.7216	9.88143	10.7259	10.7992	10.2467	10.445	10.6352	10.4959	11.0779	10.1814	10.1423	10.9926	CLM75_RS05715	10.551	10.0619	10.1915	10.2853	10.2482	10.5383	10.4384	10.1245	10.0733	10.0695	10.1068	10.2858	10.3539	10.1632	10.3135	10.2538	10.2686	10.01	10.0614	10.3817
	CLM75_RS05720	6.54037	6.99114	6.83003	6.71195	6.58153	7.14393	7.08782	7.16203	6.76677	6.88995	6.07836	7.00785	7.18406	7.09952	6.61036	6.99315	6.53176	6.93985	7.16651	6.88534	CLM75_RS05720	5.9877	6.26197	6.2379	6.24066	6.20651	6.20114	6.21561	6.24814	6.15772	5.81332	6.16722	5.9923	6.40055	6.24388	6.35373	6.24813	6.11472	6.14425	6.31319	6.16393
	CLM75_RS05725	8.98217	9.01061	9.18416	7.15129	8.97593	9.1473	9.08467	9.37727	8.91986	7.53079	6.59463	8.85108	8.82132	9.3398	8.48871	8.91153	9.02847	8.94604	9.35725	8.66592	CLM75_RS05725	7.40144	7.85711	7.74533	8.06011	7.41932	7.62194	7.81772	7.92464	7.90389	7.7262	7.76175	7.46291	7.36844	7.72348	8.21706	7.98816	7.79031	7.74282	8.23299	7.41406
	CLM75_RS05730	8.56277	8.50431	8.68241	6.82633	8.58567	9.1755	8.68366	8.71169	8.46286	6.7775	7.07553	8.43897	8.53623	8.64998	7.95273	8.5882	8.69301	8.72123	9.23676	8.53245	CLM75_RS05730	5.70685	6.42401	6.50589	6.54357	5.84913	6.10817	6.38193	6.4459	6.5052	6.02244	6.14201	6.10501	6.43826	6.41661	7.41773	6.67165	6.57623	6.37888	6.98776	5.70042
	CLM75_RS05735	6.18044	6.32352	6.25225	5.71254	6.25152	6.22328	6.20939	6.20259	6.02186	5.74621	6.16673	6.21853	5.93395	6.06774	6.31815	6.26532	5.62546	6.26196	6.10988	6.59468	CLM75_RS05735	5.23041	5.49947	5.20155	5.50155	5.40196	5.50764	5.63282	5.45139	5.58843	5.35775	5.19512	5.37135	5.18061	5.64441	5.29475	5.55601	5.52648	5.62529	5.6955	5.16896
	CLM75_RS05740	6.50297	6.90961	6.75595	7.32404	6.68635	7.23469	6.81821	6.94	6.83739	6.84135	6.30356	6.50201	6.80574	6.89969	6.77384	6.67324	6.59302	6.82674	7.27479	6.50461	CLM75_RS05740	5.99873	6.55886	6.15899	6.50103	6.13585	6.05037	6.51052	6.25519	6.07064	6.25337	6.22872	6.18746	6.16319	6.11872	6.61393	6.47886	6.17215	6.33313	6.54107	6.22309
	CLM75_RS05745	5.67416	5.83674	6.03998	7.08718	5.6432	6.85189	6.81695	6.13819	6.61032	6.81003	5.85569	5.90017	6.86713	6.3333	5.84655	5.7124	5.86745	6.56723	6.62049	5.75087	CLM75_RS05745	5.55959	6.62781	6.06289	6.36138	5.66926	5.47076	6.25602	5.82412	5.82406	5.64452	5.8121	5.74614	5.61717	5.95242	6.67795	6.26646	5.54464	5.93078	6.27374	6.23982
	CLM75_RS05755	6.21205	6.39109	6.18949	5.7478	6.30405	4.96089	6.61598	5.98719	6.17498	5.5645	6.40062	6.35627	5.79574	5.80853	6.16515	6.28979	5.9803	5.99109	5.00201	6.40979	CLM75_RS05755	6.3298	5.83602	6.09064	6.06144	5.9317	6.51762	5.72619	6.02716	6.06982	6.10428	6.27772	6.17763	6.32568	6.19405	5.64566	5.96645	6.48425	5.94246	5.89648	5.81029
	CLM75_RS05760	9.79084	9.44209	9.53488	9.64674	9.47237	10.4929	9.60544	10.1143	9.52159	9.8135	9.21733	9.68051	9.59136	10.1793	9.43104	9.70472	10.3268	9.49601	10.4728	9.35809	CLM75_RS05760	8.15763	8.38137	8.5019	8.89909	8.08458	7.94792	8.99867	8.46343	8.26573	8.38945	7.98836	8.39122	7.97673	8.19661	9.64011	8.94901	8.07628	8.2963	8.97328	8.29699
	CLM75_RS05765	9.84098	11.7288	10.4026	9.25447	10.2779	9.07336	11.3538	10.1849	10.9507	8.54375	10.3535	11.2134	11.4057	10.2248	10.0666	10.456	10.1446	11.3527	8.05798	11.0287	CLM75_RS05765	7.60549	8.27309	8.41833	8.34746	8.48797	7.71899	8.50466	8.11715	8.10811	7.8466	8.30682	8.48295	8.54045	8.12737	8.58966	8.57259	7.97153	8.31407	8.38122	8.28361
	CLM75_RS05770	2.75395	2.04648	3.2397	3.96087	2.16698	4.93056	1.86767	2.44594	2.14012	4.94341	3.02801	1.94842	2.36668	2.95989	2.41873	3.13882	2.32373	2.0517	5.94309	1.71204	CLM75_RS05770	5.03887	5.075	4.95043	4.88233	5.94278	4.34397	5.06756	5.0126	4.83869	4.77119	5.06775	4.69103	4.21485	5.03119	4.08131	4.98618	4.15744	4.92934	4.60365	5.23536
	CLM75_RS05775	9.99521	9.82929	10.1287	10.8564	9.98378	11.0887	10.3879	10.5651	10.3231	10.872	9.85547	10.2693	10.338	10.6253	10.2195	10.095	10.1371	10.2757	10.4311	10.0375	CLM75_RS05775	8.80562	9.88373	9.31929	9.64631	9.20726	8.84388	9.62778	9.42541	9.35024	9.0417	9.04251	9.25859	9.25108	9.06124	9.84066	9.55938	9.22424	9.28043	9.7046	9.63308
	CLM75_RS05780	5.40478	5.76343	5.41911	6.09113	5.40205	6.4426	5.70274	6.01412	5.97561	6.14262	5.0827	5.43198	6.11336	6.0083	5.43703	5.50769	5.52577	5.77146	6.38352	4.90604	CLM75_RS05780	4.53395	5.71575	5.10833	5.49674	4.87968	4.53038	5.38234	4.99073	4.87798	5.07522	4.78744	4.90324	4.6831	4.88323	5.7332	5.3512	4.75937	5.11772	5.48235	5.32694
	CLM75_RS05785	6.32849	6.67039	6.82414	7.2878	6.42782	7.28206	7.22721	6.92926	7.1727	7.3691	6.54292	6.61561	7.53298	7.08906	6.63783	6.46756	6.52205	6.68479	7.10071	6.57987	CLM75_RS05785	6.06625	6.77191	6.2625	6.36885	6.12199	6.04586	6.52529	6.17893	6.17437	6.08346	6.08021	5.9697	6.29611	6.18571	6.74607	6.43806	5.90189	6.28371	6.55759	6.44372
	CLM75_RS05790	6.40688	5.85891	6.1584	6.78031	6.05672	5.96352	6.30047	6.20426	6.80089	6.60733	6.55162	6.54714	6.34874	6.60976	6.17755	5.79991	6.43324	6.2348	6.45949	7.19871	CLM75_RS05790	6.14717	5.14339	5.54892	5.97602	4.15715	6.27871	5.66176	4.95955	5.01669	4.49674	4.78392	5.77842	6.05699	5.98952	6.15741	5.80502	5.95842	5.39695	5.92617	5.2335
	CLM75_RS05795	7.63073	7.16986	7.7752	10.2893	7.85838	9.56265	7.84733	9.08472	7.73153	9.19192	7.17738	7.53875	8.05633	9.28768	8.10811	7.88407	7.93088	7.6197	9.44061	6.91486	CLM75_RS05795	7.05853	8.5592	7.95524	8.27801	7.70988	6.79202	8.4767	7.68438	7.70135	7.54888	7.6822	7.83868	7.78911	7.75537	8.83214	8.37192	7.32946	8.02321	8.46013	8.24038
	CLM75_RS05800	3.21196	3.83149	3.63911	4.08687	3.44215	4.27238	3.98739	3.64443	3.91356	4.02302	3.42412	3.70643	4.04034	3.75036	3.616	3.78701	3.68899	4.07777	4.20768	3.56571	CLM75_RS05800	3.18683	3.57247	3.51687	3.46908	3.56769	3.35451	3.56716	3.45064	3.44959	2.95312	3.44078	3.34735	3.97464	3.23097	3.71027	3.32262	3.13179	3.33522	3.16481	3.35373
	CLM75_RS05805	6.17602	6.68535	6.53114	6.23495	6.37967	6.38321	6.10439	6.17161	6.42731	5.94547	6.78656	6.32539	6.54718	6.12064	6.53209	6.63133	6.16393	6.35057	6.51783	6.52099	CLM75_RS05805	5.39163	5.34805	5.72626	5.1636	5.92693	5.71671	5.4291	5.58629	5.47363	5.51992	5.61125	5.23499	5.15613	5.70088	5.50832	5.36108	5.3329	5.73553	5.24698	5.29528
	CLM75_RS05810	4.47073	4.88482	4.88961	5.02152	4.19237	5.49318	5.3109	5.00361	5.05043	5.03155	4.53836	4.88266	5.17504	4.91773	4.56146	4.73368	4.85262	5.07076	5.16704	4.79627	CLM75_RS05810	4.07608	4.37444	4.15106	3.93686	3.93099	3.8232	4.24211	4.11487	4.05396	3.85258	4.18007	4.04614	3.35454	4.30435	4.22852	4.07133	3.70189	4.06621	4.21581	4.34282
	CLM75_RS05815	5.93019	5.57491	5.86417	5.92648	5.97631	6.30383	5.48831	5.71917	5.47147	6.06036	6.16834	5.54458	6.00405	5.77752	6.07218	5.68889	5.74345	5.74434	6.08276	5.69148	CLM75_RS05815	5.77256	5.51611	5.4706	5.06646	5.3916	5.6457	5.4133	5.38589	5.36382	5.60271	5.45955	5.50882	5.78625	5.44263	5.53372	5.28701	5.17647	5.38151	5.25399	5.1196
	CLM75_RS05820	8.34412	7.86853	8.33477	8.71186	8.27391	8.86572	8.17355	8.49797	8.22611	8.78807	8.30592	7.62115	8.572	8.51363	8.39956	7.81859	8.28987	8.06841	8.67624	7.38066	CLM75_RS05820	6.79506	8.22008	7.22181	7.50995	7.41649	6.50052	7.67315	7.07374	7.00117	7.07602	7.01351	7.2428	6.97705	7.07275	7.88722	7.50863	6.72919	7.2834	7.56661	7.77738
	CLM75_RS05825	6.30443	6.29584	6.34742	6.23614	6.33887	6.93511	6.02237	6.45691	6.01184	6.3426	6.02047	6.04442	6.19039	6.57165	6.32708	6.45184	6.23918	6.11324	7.16955	5.59311	CLM75_RS05825	4.99679	5.84806	5.01524	5.53473	5.19643	4.35048	5.78612	4.99952	4.97399	4.97932	5.1356	5.30888	4.80359	5.26672	5.88148	5.40821	4.972	5.51265	5.52352	5.71777
	CLM75_RS05830	6.89351	7.40556	7.12515	7.30237	6.6438	8.45847	7.66234	7.46843	7.65444	7.2567	6.90327	7.36503	7.96977	7.42534	6.93922	7.33276	7.17245	7.59329	8.13351	6.82444	CLM75_RS05830	5.76726	6.62375	6.40275	6.43687	6.30181	5.57797	6.72221	6.31037	6.09322	6.02789	5.96603	6.2646	6.51086	6.28496	7.29873	6.63792	5.86556	6.26389	6.53303	6.50882
	CLM75_RS05835	7.60879	7.04724	7.49842	7.68779	7.63884	7.53554	7.199	7.66993	7.19071	7.67497	7.76213	7.28255	7.43305	7.57225	7.56877	7.38336	7.4056	7.19368	7.51172	7.28023	CLM75_RS05835	6.97101	7.12753	6.84372	6.99849	7.03306	6.80512	6.9359	6.91891	7.00745	7.08128	6.94542	7.055	7.01385	6.8034	6.85079	6.9412	6.85297	6.9999	6.9325	7.13977
	CLM75_RS05840	6.06641	6.6217	6.3439	6.28382	5.9452	7.25129	6.75965	6.67747	6.45062	6.48715	5.78528	6.59608	6.53454	6.66767	5.92852	6.65196	6.48725	6.7845	7.23501	6.44373	CLM75_RS05840	5.06007	5.54215	5.51145	5.26029	5.21091	4.77865	5.55578	5.38645	5.30878	5.12903	5.14524	5.37761	5.31201	5.20648	6.01368	5.42212	5.01291	5.23633	5.47877	5.26108
	CLM75_RS05845	6.36483	5.30666	5.65258	4.99194	6.77451	4.77443	4.94286	4.75876	5.12123	5.40998	6.26026	5.4285	4.70177	5.51035	5.93972	4.95936	6.34447	4.86254	5.55301	4.88571	CLM75_RS05845	4.58304	5.1339	5.10525	4.80931	5.54283	4.24262	4.73866	5.34051	5.5113	5.55209	5.46615	4.31096	4.55161	5.35058	4.52287	4.92356	4.03194	5.29651	4.99013	4.67628
	CLM75_RS05850	7.36833	6.18335	6.67832	6.24869	7.70745	5.75611	5.75604	5.77496	6.18314	6.46229	7.44911	6.28423	5.72218	6.49972	7.27994	5.9537	7.31153	5.82114	6.33162	5.67902	CLM75_RS05850	5.40144	5.61348	5.91729	5.75987	6.47646	5.0556	5.87941	6.03857	6.20257	6.48609	6.40863	5.40237	5.92313	5.99126	5.33863	6.12095	4.88653	6.3756	5.68828	6.13341
	CLM75_RS05855	7.48154	6.16781	6.61784	5.94251	7.61289	5.55001	5.58102	5.7921	6.02509	6.0778	7.26062	6.08037	5.81597	6.42943	7.2874	5.93015	7.36307	5.66127	6.11461	5.67763	CLM75_RS05855	5.78085	5.47715	5.82681	5.71715	6.51992	5.30722	5.75423	5.89685	5.93682	6.2487	6.23839	5.75818	5.7098	5.6805	5.15857	5.73483	5.20167	5.94024	5.41331	6.37217
	CLM75_RS05860	6.4214	4.89257	5.44017	4.45793	6.58195	4.32801	4.45787	4.44307	4.71043	4.73358	6.31419	4.76055	4.40543	5.07991	6.23797	4.56857	6.27321	4.4485	4.74412	4.28118	CLM75_RS05860	4.14074	3.83529	4.2057	4.45053	5.16568	3.74383	4.35509	4.4067	4.56335	4.76859	5.09072	4.39972	4.39303	4.38611	3.60641	4.52358	3.69006	4.72553	4.34873	4.77396
	CLM75_RS05865	8.54811	7.27795	7.76667	7.01021	8.78758	6.4781	6.79216	6.77552	7.05162	7.28751	8.57569	7.16015	6.71342	7.31509	8.41805	6.94147	8.28468	6.73982	7.06854	6.77197	CLM75_RS05865	7.38077	6.98397	7.23899	7.15605	7.61954	7.40477	6.99281	7.30277	7.39787	7.68637	7.50886	7.09732	7.02065	7.37533	6.78359	7.09966	7.13553	7.34252	6.7797	7.25764
	CLM75_RS05870	8.66041	7.02917	7.60113	6.84014	8.86924	6.50816	6.60614	6.65483	6.66174	6.98206	8.5801	6.8747	6.4402	7.30369	8.3699	6.71181	8.36772	6.48103	7.10864	6.35081	CLM75_RS05870	6.19814	6.07444	6.58089	6.71671	7.36151	5.73548	6.68134	6.76448	6.85921	7.2901	7.06045	6.16774	6.69208	6.73847	5.99323	6.73025	5.93231	6.86875	6.47245	7.04088
	CLM75_RS05880	8.98138	7.81794	8.18098	7.35159	9.08956	7.02398	7.09859	7.22595	7.39363	7.15722	9.1496	7.48164	7.39832	7.84063	9.05311	7.26031	8.94597	7.0079	7.35298	6.8592	CLM75_RS05880	6.14542	6.55956	7.30215	7.17897	7.87124	6.11392	6.9947	7.43764	7.28064	7.36662	7.62605	6.24677	6.72575	6.99366	6.79151	7.20415	5.9006	7.38716	6.82156	7.5585
	CLM75_RS05885	10.6882	9.26824	9.78368	9.02213	10.8428	8.61604	8.72147	8.84532	8.90949	9.07522	10.6725	9.18455	8.67616	9.51713	10.4933	8.99972	10.3947	8.64624	9.18794	8.57836	CLM75_RS05885	8.51511	8.83139	9.21338	9.47176	9.92849	8.15593	9.32752	9.44202	9.43598	9.62472	9.76727	8.49199	8.70702	9.1718	8.94379	9.45001	8.19814	9.50342	9.07411	9.71031
	CLM75_RS05890	9.49286	8.22445	8.68136	8.341	9.68793	7.78712	7.75505	7.80748	7.99805	8.31629	9.57675	8.16361	7.73624	8.50467	9.38427	7.94017	9.22861	7.69533	8.21131	7.54659	CLM75_RS05890	7.4762	8.03209	8.247	8.52523	9.01825	7.04599	8.45055	8.40663	8.48386	8.80156	8.85835	7.17077	7.51363	8.17492	7.96918	8.61028	7.11523	8.77199	8.16576	8.68891
	CLM75_RS05895	9.23558	7.67596	8.15171	7.29369	9.3809	7.02076	7.16255	7.2681	7.28916	7.34245	9.17042	7.30457	7.14781	7.76787	9.08608	7.25905	9.09305	6.97111	7.40414	6.81181	CLM75_RS05895	6.91836	6.83472	7.4688	7.36132	8.04528	6.83211	7.24595	7.54793	7.48424	7.7607	7.6796	6.96125	7.50396	7.37533	6.8137	7.40278	6.58982	7.64546	7.01194	7.7331
	CLM75_RS05900	8.90542	7.38539	7.89523	7.10196	9.00426	6.88171	6.84354	6.96781	7.02403	7.23605	8.72409	7.19405	6.86791	7.49437	8.67128	6.99845	8.719	6.75648	7.26772	6.59799	CLM75_RS05900	6.801	6.92398	7.28117	7.17245	7.94886	6.58472	7.15016	7.45943	7.39951	7.79472	7.59926	6.90225	6.9103	7.07316	6.66077	7.20945	6.44698	7.56265	6.84356	7.61979
	CLM75_RS05905	6.76787	5.09364	5.57654	4.91031	6.82949	4.54789	4.58585	4.64031	4.72854	4.94893	6.47793	4.80779	4.43084	5.2045	6.23244	4.7836	6.56523	4.49115	4.94882	4.60321	CLM75_RS05905	4.91972	4.96451	5.03801	4.91269	5.77401	4.55172	4.98753	5.24523	5.3719	5.60563	5.53582	4.81147	4.48764	5.08442	4.51652	5.01983	4.44102	5.37659	4.56473	5.46931
	CLM75_RS05910	6.1515	4.75562	5.23732	4.3586	6.34584	4.01962	4.1234	4.44496	4.39745	4.42073	5.96109	4.6088	3.93477	4.85264	5.74139	4.33345	6.17443	3.89591	4.33572	4.1144	CLM75_RS05910	4.71474	4.44464	4.83756	4.87	5.32662	4.70055	4.74227	5.15571	5.00462	5.10651	5.15208	4.74042	5.13957	4.85862	4.61496	4.76195	4.66287	4.8178	4.4486	5.13359
	CLM75_RS05915	8.45212	6.88476	7.41579	6.53229	8.53511	6.13339	6.43041	6.50606	6.58092	6.7002	8.36781	6.76576	6.3454	6.9368	8.14697	6.62058	8.19942	6.4196	6.68131	6.23786	CLM75_RS05915	6.68614	6.51934	6.82826	6.8685	7.61978	6.4784	6.95901	7.06016	7.02826	7.26536	7.38131	6.66836	7.00474	6.85025	6.60497	6.97225	6.36292	7.24304	6.56915	7.39219
	CLM75_RS05920	7.39183	5.82823	6.21093	5.45652	7.50171	5.07143	5.43701	5.36205	5.52343	5.65653	7.14038	5.63701	5.00923	5.87956	7.01668	5.44407	6.76593	5.50409	5.67694	5.24808	CLM75_RS05920	5.1925	5.35242	5.51223	5.52925	6.14958	5.0978	5.3244	5.63879	5.6644	6.26544	5.84626	5.46542	5.35567	5.44518	5.26094	5.57595	5.12691	5.91956	5.16461	5.75962
	CLM75_RS05925	6.85329	5.47512	5.75873	5.11107	7.07074	4.75188	5.07121	5.01381	5.20794	5.2642	6.86665	5.22138	4.83462	5.47802	6.72457	5.10484	6.39719	5.20358	5.26302	4.95623	CLM75_RS05925	5.24247	4.98223	5.23571	5.34289	5.84239	4.93517	5.53612	5.44819	5.47113	5.70028	5.62607	4.99969	4.93412	5.13732	4.77257	5.35054	5.1291	5.7032	4.99516	5.75316
	CLM75_RS05930	7.29159	6.75035	6.8409	6.44153	7.40143	6.20111	6.228	6.59961	6.49636	6.45002	7.3751	6.6207	6.30303	6.73516	7.05234	6.26866	7.42102	6.13606	6.58151	6.30605	CLM75_RS05930	5.98052	6.24092	6.24676	6.18452	6.59709	6.00415	6.4371	6.39576	6.13456	6.46613	6.34973	6.13579	6.34386	6.23876	6.2825	6.26366	5.97678	6.26699	5.96938	6.34665
	CLM75_RS05935	9.4329	9.29637	9.4688	9.71564	9.44744	9.82002	9.41854	9.8041	9.40438	9.66372	9.40885	9.37895	9.35611	9.77613	9.39236	9.36641	9.55201	9.07135	9.67701	9.20118	CLM75_RS05935	9.69379	9.91081	10.1958	9.58786	9.9561	9.8147	9.43919	9.88265	9.86146	9.93513	10.0781	9.8839	9.87762	9.81959	9.64539	9.61535	9.56752	9.79356	9.47849	9.8474
	CLM75_RS05940	6.41345	6.72088	6.64816	6.45005	6.68752	7.18903	6.64	6.99188	6.71448	6.60228	6.35911	6.69312	6.68511	6.96157	6.34989	6.74429	6.85295	6.44037	7.03786	6.185	CLM75_RS05940	5.9387	6.54866	6.71812	6.23201	6.50023	6.06923	6.36032	6.56314	6.50275	6.38594	6.53179	6.20955	6.02129	6.52586	6.87955	6.19351	6.25271	6.54313	6.39089	6.44211
[truncated: 4,262 more rows]

## Sheet: Supplementary Table 2
DEG wspE liquid medium	Synonym	Gene	Product	Location	Strand	Length	logFC	logCPM	F	PValue	FDR
[truncated: 5,403 more rows]

[truncated: 19 more sheets: Supplementary Table 3, Supplementary Table 4, Supplementary Table 5, Supplementary Table 6, Supplementary Table 7, Supplementary Table 8, Supplementary Table 9, Supplementary Table 10, Supplementary Table 11, Supplementary Table 12, Supplementary Table 13, Supplementary Table 14, Supplementary Table 15, Supplementary Table 16, Supplementary Table 17, Supplementary Table 18, Supplementary Table 19, Supplementary Table 20, Supplementary Table 21]
